# Supplementary material for: Combinatorial expression motifs in signaling pathways
Source: PubMed Central journal article supplement (PMC10794782; doi:10.1016/j.xgen.2023.100463), 2024-01-10

**Cell Genomics, Volume 4**

**Supplemental information**

**Combinatorial expression motifs  
in signaling pathways**

**Alejandro A. Granados, Nivedita Kanrar, and Michael B. Elowitz**

Table S1. List of single-cell RNA seq datasets used in this study (related to main figures 1 and 2)

| <b>Dataset</b>                                                                                                  | <b>Time points</b>                                       | <b>Reference</b> | <b>Cells</b> | <b>Mice sampled</b>              | <b>Technology</b> | <b>No. of Cell States in Integrated Atlas</b> |
|-----------------------------------------------------------------------------------------------------------------|----------------------------------------------------------|------------------|--------------|----------------------------------|-------------------|-----------------------------------------------|
| Forelimb atlas (The changing mouse embryo transcriptome at whole tissue and single-cell resolution)             | E10.5, E11.0, E11.5, E12.0, E13.0, E13.5, E14.0, E15.0   | [28]             | 90,637       | Pair of forelimbs per time point | 10X               | 90                                            |
| A single-cell molecular map of mouse gastrulation and early organogenesis                                       | E6.5, E6.75, E7.0, E7.25, E7.5, E7.75, E8.0, E8.25, E8.5 | [63]             | 116,312      | 411 mouse embryos                | 10X               | 134                                           |
| The emergent landscape of the mouse gut endoderm at single-cell resolution                                      | E5.5                                                     | [30]             | -            | -                                | 10X               | 20                                            |
| Single-cell RNA-seq analysis unveils a prevalent epithelial/mesenchymal hybrid state during mouse organogenesis | E9.5, E10.5, E11.5                                       | [31]             | 1916         | 7 embryos                        | Smart-seq2        | 28                                            |
| Molecular recording of mammalian embryogenesis                                                                  | E6.5, E7.0, E7.5, E8.0, E8.5                             | [27]             | 88,779       | 50 embryos                       | 10X               | 181                                           |
| Tabula Muris, Tabula Muris Senis                                                                                | 1mo, 3mo, 18mo, 21mo, 24mo, 30mo                         | [25,26]          | 450,000+     | -                                | 10X, Smart-seq2   | 753                                           |

# Supplementary Figure 1

A

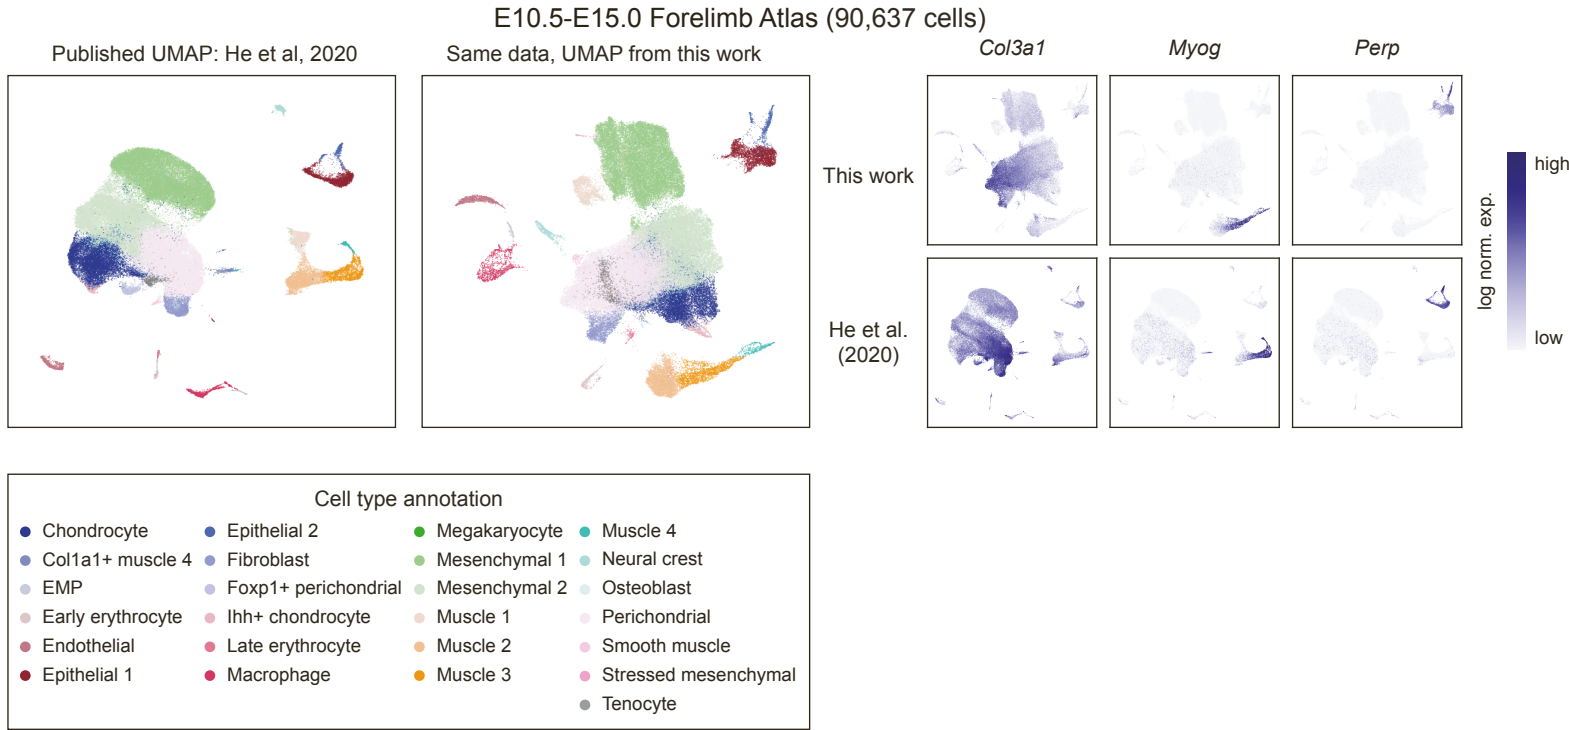

Figure S1. Single-cell RNA seq analysis and expression of TGF- $\beta$  receptors (related to main figure 2)

- A. Analysis of scRNA-seq datasets using the standard Scanpy pipeline recapitulates published analyses, including [28]. Independent analysis of mouse forelimb over days E10.5-E15.0 captures similarity in cell types (colors, left) and gene expression (right).
- B. The integrated atlas captures cell type similarity across datasets. Cell clusters with similar annotations in different data sets remain similar to each other in the integrated atlas.
- C. Cluster-averaged profiles reflect co-expression in single-cells. Shown is an example of a single cluster from the forelimb epithelial tissue data set at day E15. Left, expression of TGF- $\beta$  receptor genes averaged over all cells in the cluster corresponding to forelimb epithelial tissue at day E15.0. Right, pairwise conditional probability in single cells of gene 2 expression conditioned on gene 1 expression. Pairs of genes with significant entries (\*\*) are co-expressed in the cluster-averaged profile. Higher-order conditional probabilities were not computed due to dropout effects in scRNA-seq data.

Supplementary Figure 2

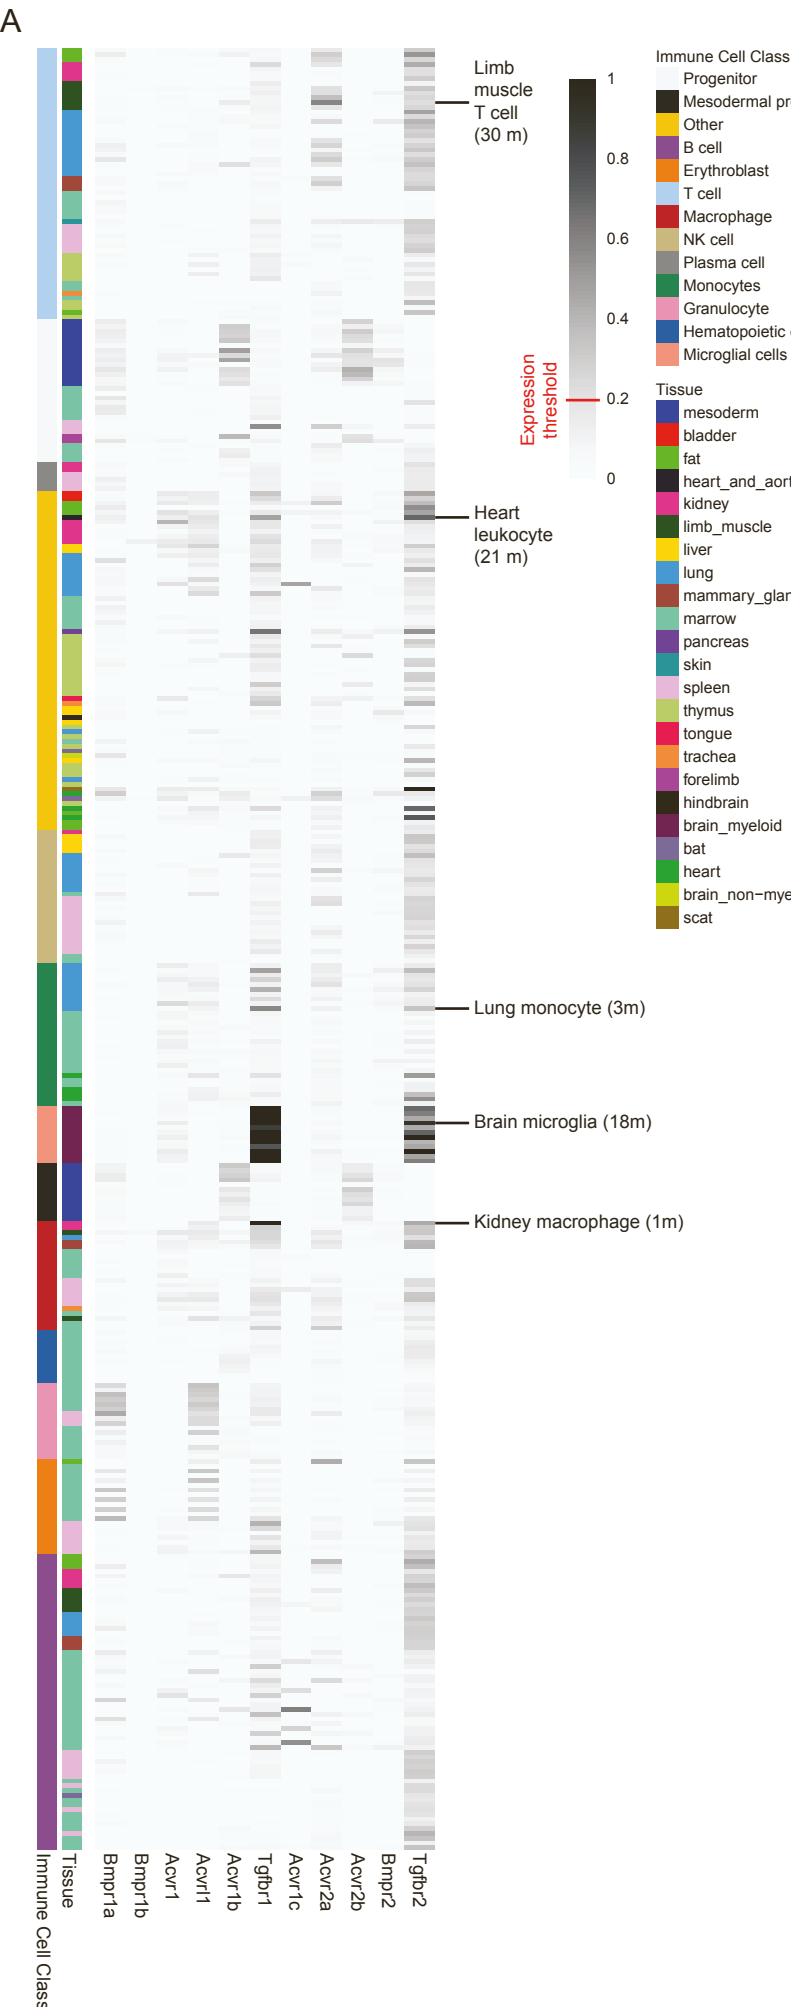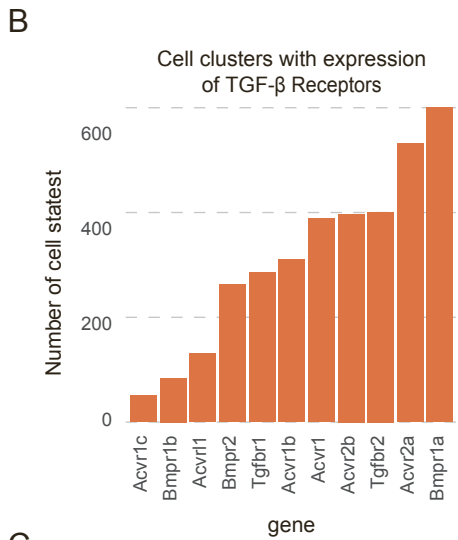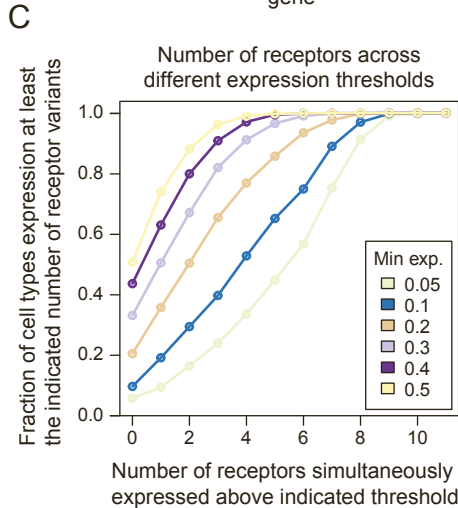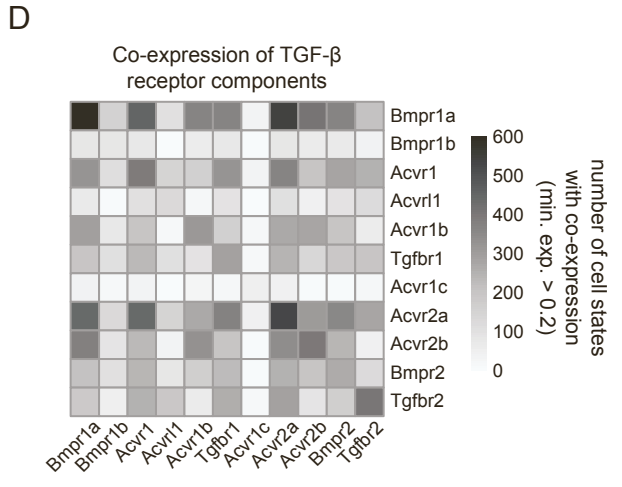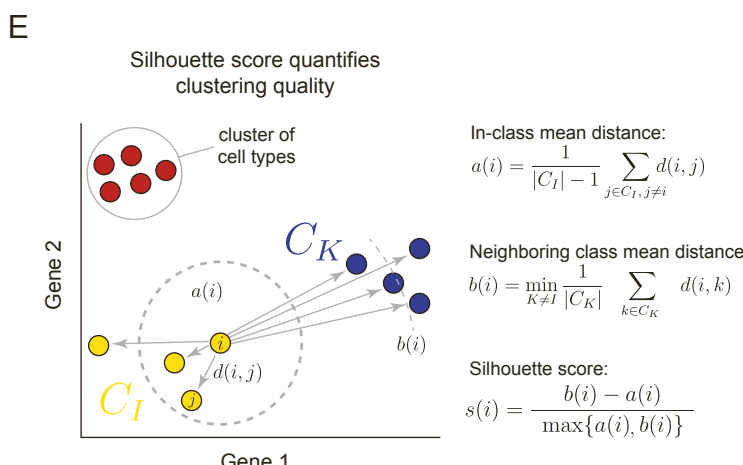

Figure S2. Co-expression statistics of TGF- $\beta$  receptors across all cell states (related to main figure 3).

- A. A heatmap showing the average normalized expression of TGF- $\beta$  receptors for the immune cell types not included in the clustering analysis due to low mRNA expression levels. Each gene's average expression level was normalized from 0 to 1 relative to the minimum and maximum values observed across all 1206 cell types (Figure 3B, Methods). A cell type was included if it showed normalized expression above 0.2 for more than two receptors. The color side bars indicate the tissue of origin and the broad immune cell class.
- B. Histogram showing the number of cell types in the integrated atlas with normalized expression of TGF- $\beta$  receptors above a threshold of 0.2 in standardized expression units.
- C. The number of TGF- $\beta$  receptor components simultaneously expressed for different values of the minimum expression threshold (colors).
- D. Pairwise co-expression of TGF- $\beta$  receptor expression reveals broad receptor co-expression patterns. Off-diagonal elements indicate the number of cell states co-expressing, above threshold, the indicated pair of components. Diagonal elements indicate the number of cell states expressing the corresponding individual gene (as shown in A).
- E. The silhouette score quantifies clustering quality (schematic). For a given clustering, we compute the silhouette score on every data point  $i$ . We compute  $a(i)$ , the mean distance between  $i$  and every other point in the same cluster, and  $b(i)$ , the mean distance between  $i$  and the nearest neighboring cluster. The silhouette score for the data point  $i$  is then defined as the difference between the inter- and intra-cluster distances, normalized to the maximum of the two (equations). A silhouette score value close to 1 corresponds to well-defined clusters, where the data point  $i$  is similar to other members of its cluster and dissimilar to others. In contrast, a value close to -1 suggests poor cluster assignment. Finally, the silhouette score for a given clustering, is taken as the average of the individual scores for all data points. In our analysis, a data point corresponds to a vector of the scaled, normalized counts of pathway gene expression of a single cell state.

# Supplementary Figure 3

A

## TGF- $\beta$ motifs obtained with different pairwise distance metrics

Mean of pairwise distances (in paper)

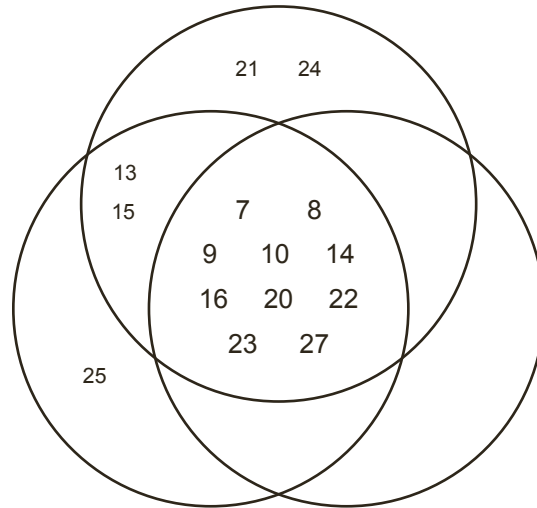

Top 10th percentile of pairwise distances

Maximum of pairwise distances

B

## Pairwise correlations

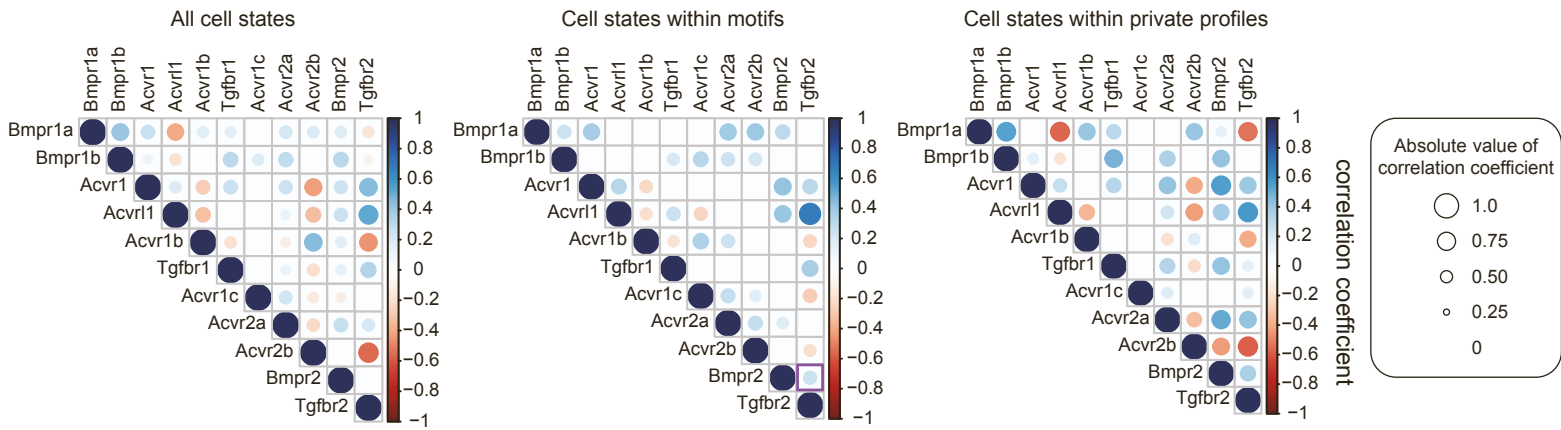

C

## Profile Tissue Composition

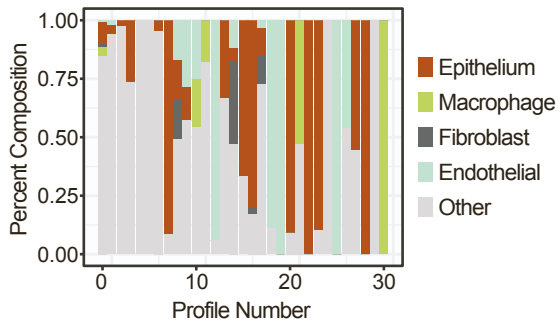

D

## TGF- $\beta$ 'private' profiles

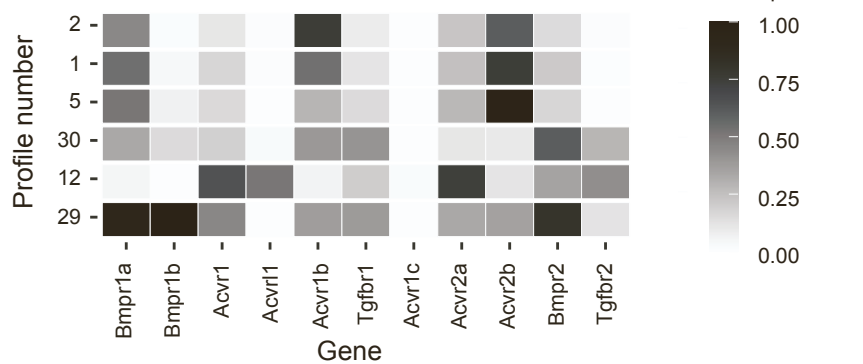

Figure S3. Dispersion metrics and private profiles for TGF- $\beta$  (related to main figures 3 and 4).

- A. Alternative definitions of the dispersion metric recover similar sets of motifs. The mean of intra-class pairwise distances was used as the dispersion metric throughout this work. Still, we tested two additional dispersion metrics, one that uses the maximum of intra-class pairwise distances, the second that uses the top 10th percentile. The Venn diagram shows profiles identified as motifs from these three distinct definitions of the dispersion metric. Most profiles (shown in the intersection of the three circles) are robust to the definition of dispersion. Notably, the dispersion metric that utilizes the maximum pairwise distances only captures profiles in this intersection. The mean pairwise distance, however, captures two additional profiles as motifs, profiles 21 and 24. Profile 24 contains only two cell states, liver B cells and bone marrow NK cells. The top 10th percentile of pairwise distances captures the adult endothelium-specific profile, 25, as a motif. However, the maximum metric omits profiles 13 and 15, even though they appear to be motifs since they are both dispersed across the adult smooth muscle and adult kidney epithelium.
- B. TGF- $\beta$  profiles exhibit unique pairwise receptor correlations. Each matrix represents the correlation coefficient for each pair of receptors across all cell states (left), cell states associated with motifs (middle), and cell states associated with private profiles (right).
- C. Cell class composition of each TGF- $\beta$  profile, matching classes depicted in Figure 4F. “Other” includes all cell states in the atlas that do not fall into the epithelial, macrophage, fibroblast, or endothelial cell classes.
- D. TGF- $\beta$  profiles with average dispersion less than the 50 percentile from the expected distribution were classified as *private profiles*.



Supplementary Figure 4

A

Well-defined peak (discrete profiles)

Broad peaks (continuous profiles)

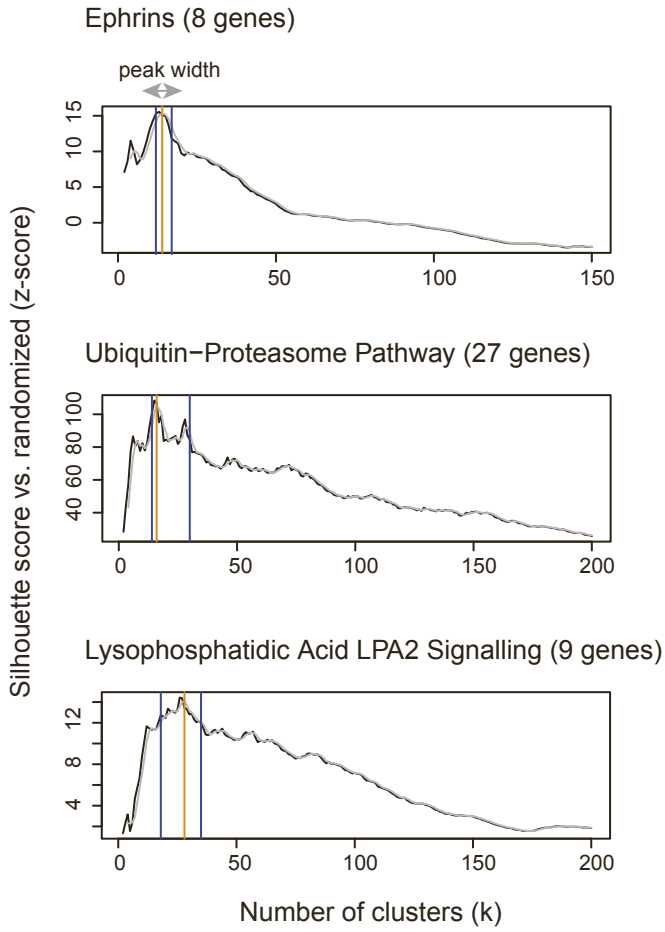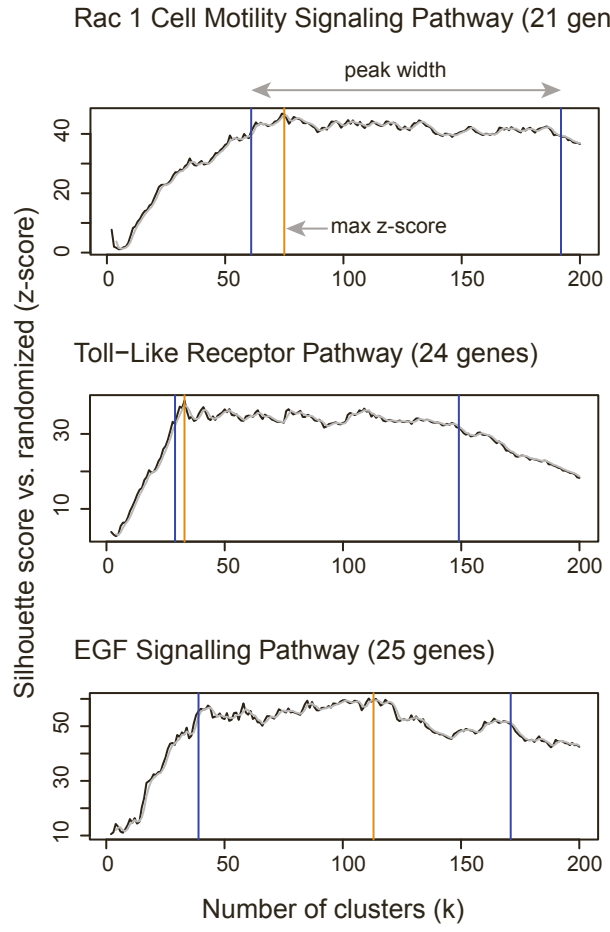

Figure S4. Silhouette analysis for other pathways (related to main figures 3 and 5).

Silhouette analysis of indicated pathways, as in Figure 3A and Figure 5A. A vertical yellow line indicates the value of  $k$  (the proposed number of clusters) with the maximum silhouette  $z$ -score. The peak width is shown with two blue vertical lines (the minimum and maximum values of  $k$  with a 10% difference from the maximum value). Finally, the relative peak width is calculated as the ratio of the peak width divided by the maximum number of  $k$  considered. We show three pathways with the lowest (left) and highest (right) relative width.

Supplementary Figure 5

A

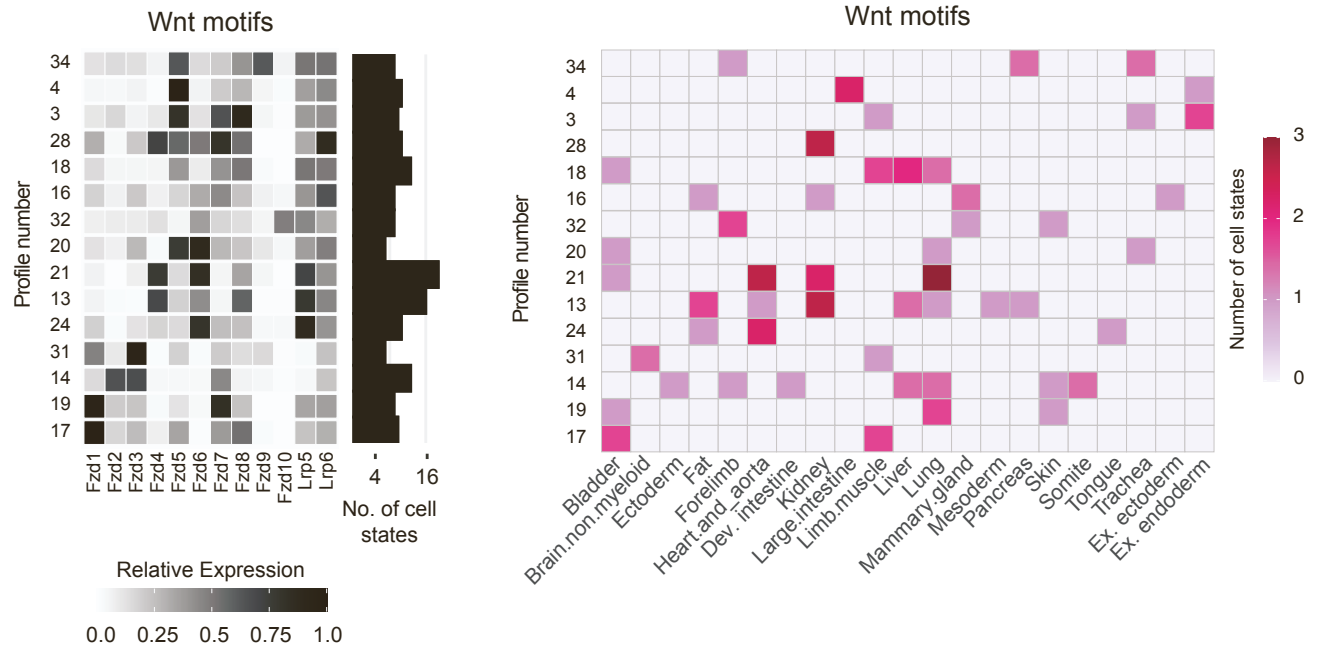

B

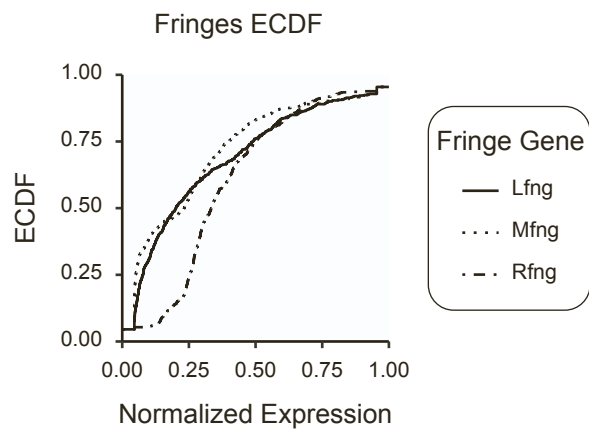

C

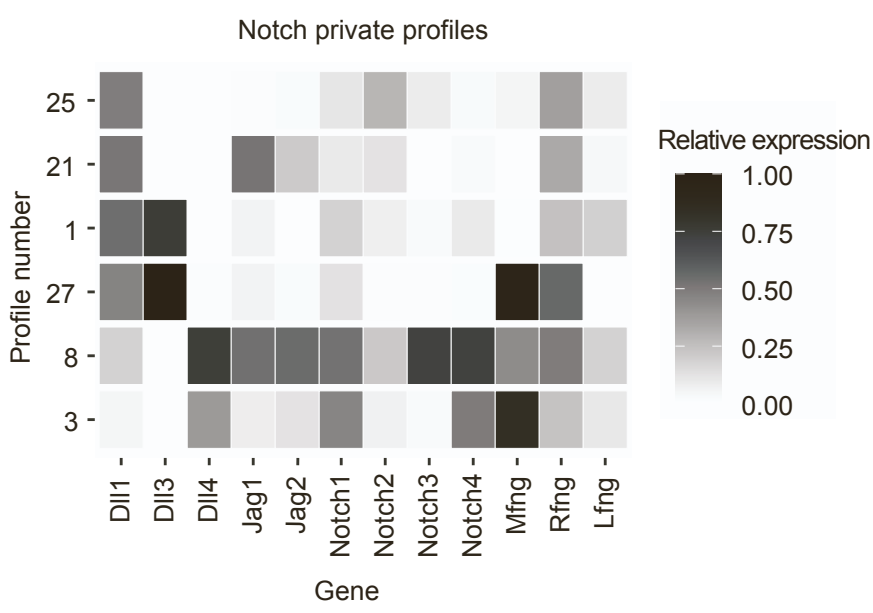

Figure S5. Motifs for Wnt and Notch pathways (related to main figures 4 and 5).

- A. Motifs in the Wnt pathway and their distribution across tissues and organs, similar to Figure 4D, E.
- B. Cumulative distribution histogram of Fringe gene expression across all cell states.
- C. Notch pathway private profiles.

# Supplementary Figure 6

A

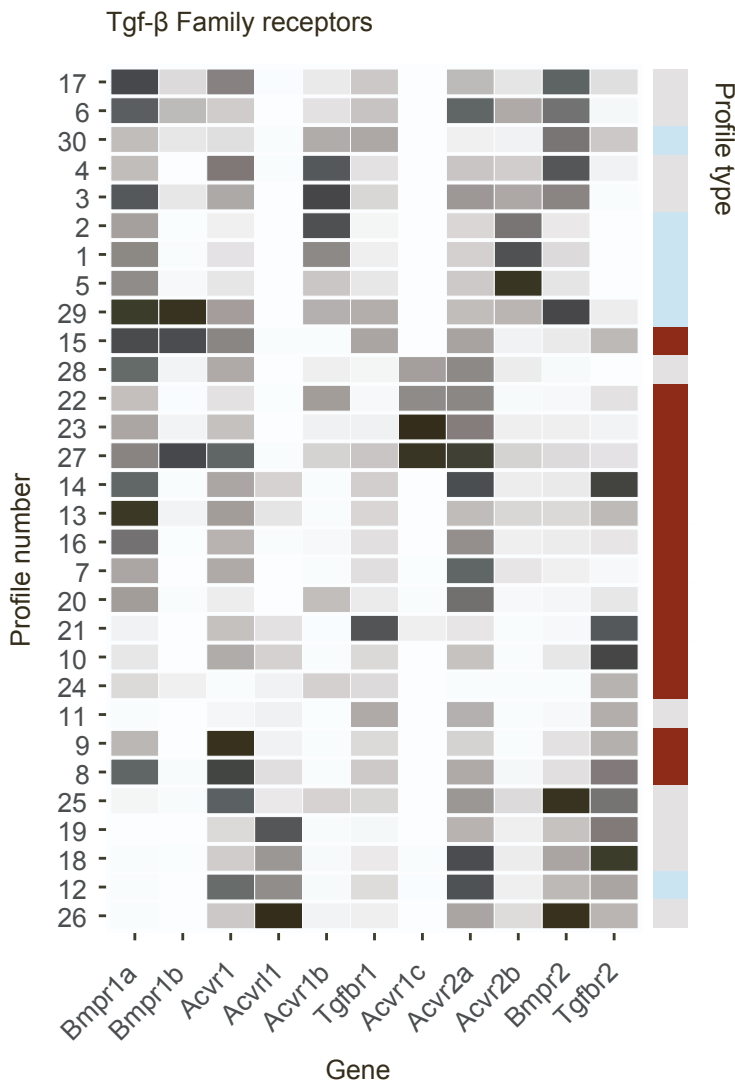

B

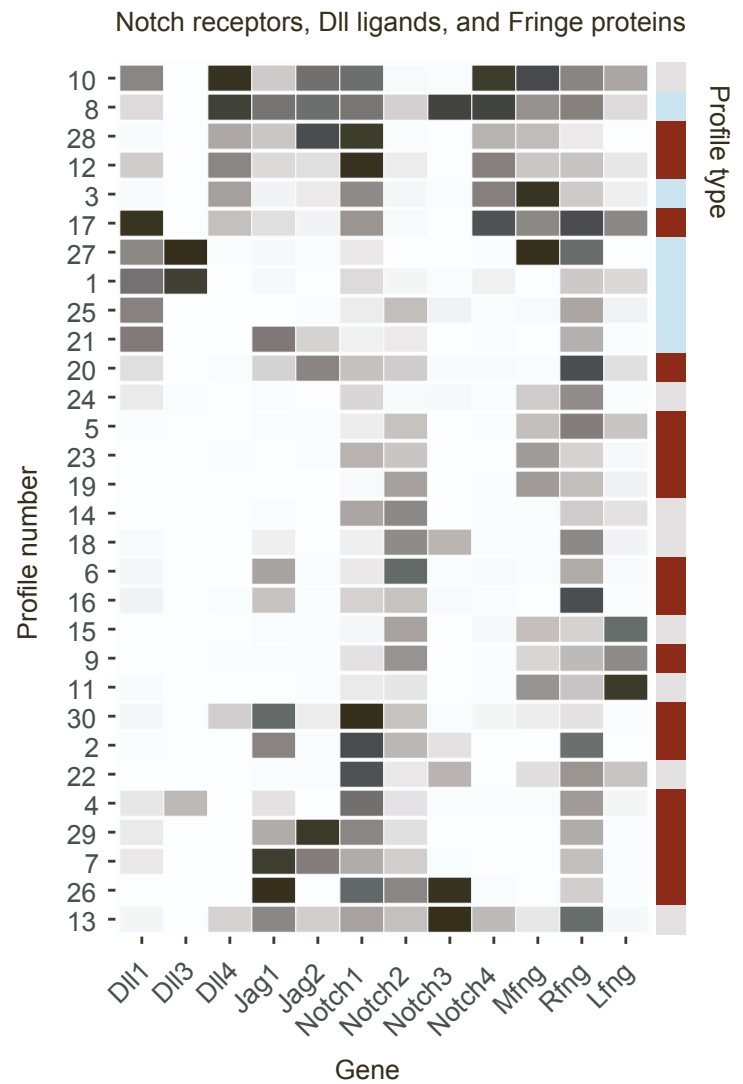

C

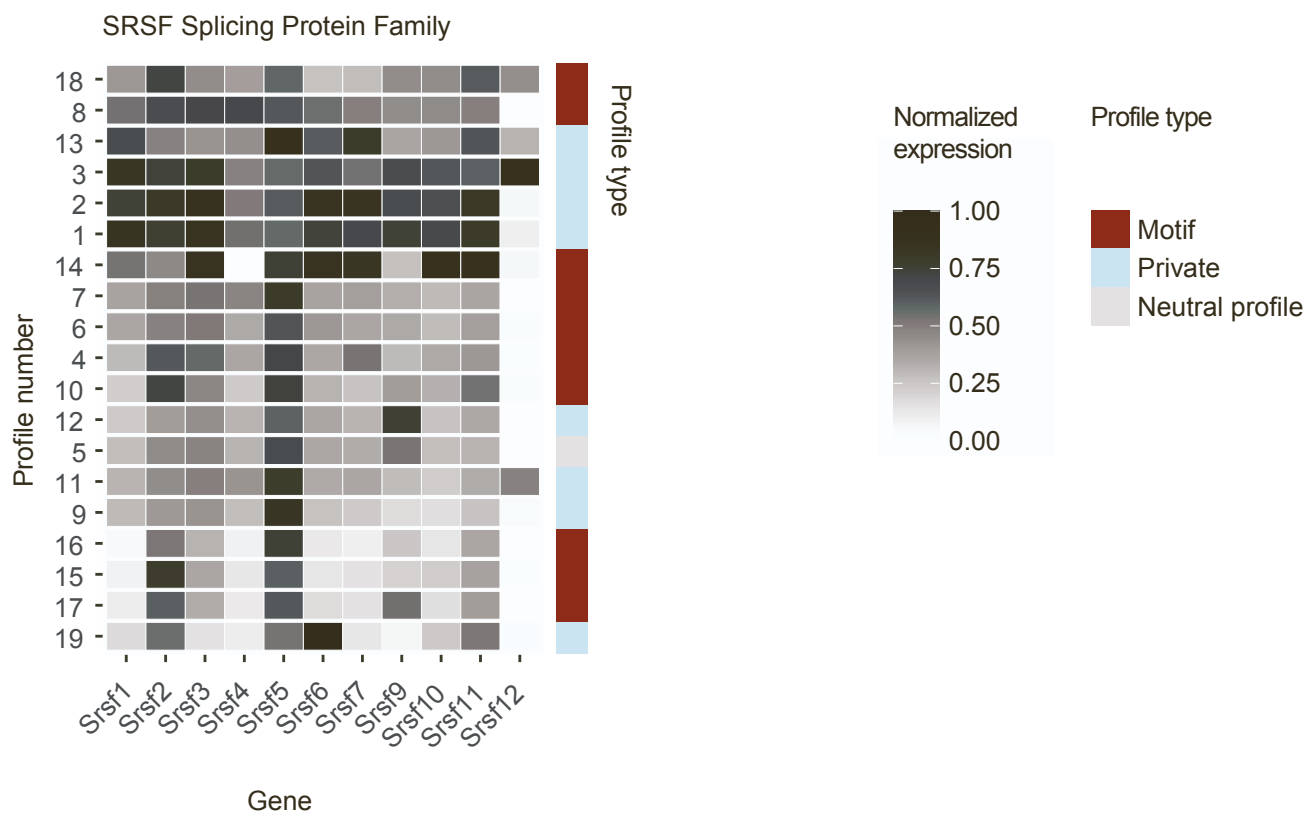

Figure S6. All profile classes for TGF- $\beta$ , Notch, and SRSF (related to main figures 5 and 6).

All profiles are organized by similarity and annotated by their profile number and profile type (motif, private, or neutral) for TGF- $\beta$  (A), Notch (B), and SRSF (C).

## Supplemental data S1

Global cell type dendrogram, as shown in Figure 3C, along with a heatmap of the projection of each cell type on the top 20 principal components computed from the whole-transcriptome space.





## Supplemental data S2

Analysis of pathways shown in Figure 5C. Each pathway has plots displayed on two pages. The first page has plots displayed for pathways as done for TGF-beta in Figures 3 and 4. The second page shows UMAPs highlighting each pathway motif (colored dots) and displays the dispersion score for the motif.

# BCR Signaling Pathway (k\_opt = 110)

Pathway genes

|        |        |        |
|--------|--------|--------|
| Plcg1  | Blnk   | Ppp3cc |
| Nfatc1 | Vav1   | Elk1   |
| Nfatc2 | Shc1   | Raf1   |
| Nfatc4 | Sos1   | Map2k1 |
| Nfatc3 | Grb2   | Mapk3  |
| Orai1  | Prkca  | Jun    |
| Lyn    | Prkcb  | Fos    |
| Cd79a  | Calm3  | Rac1   |
| Cd79b  | Ppp3ca | Map3k1 |
| Syk    | Ppp3cb | Mapk10 |

## Gene Co-Expression Above Threshold

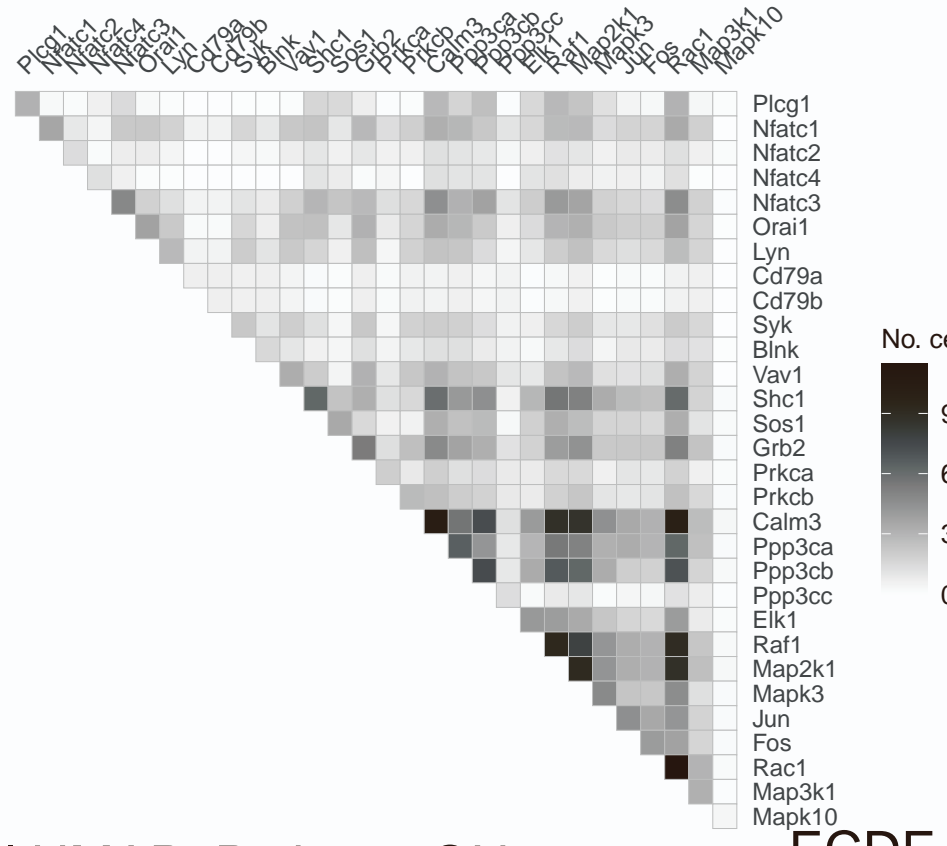

## Silhouette and Z-score

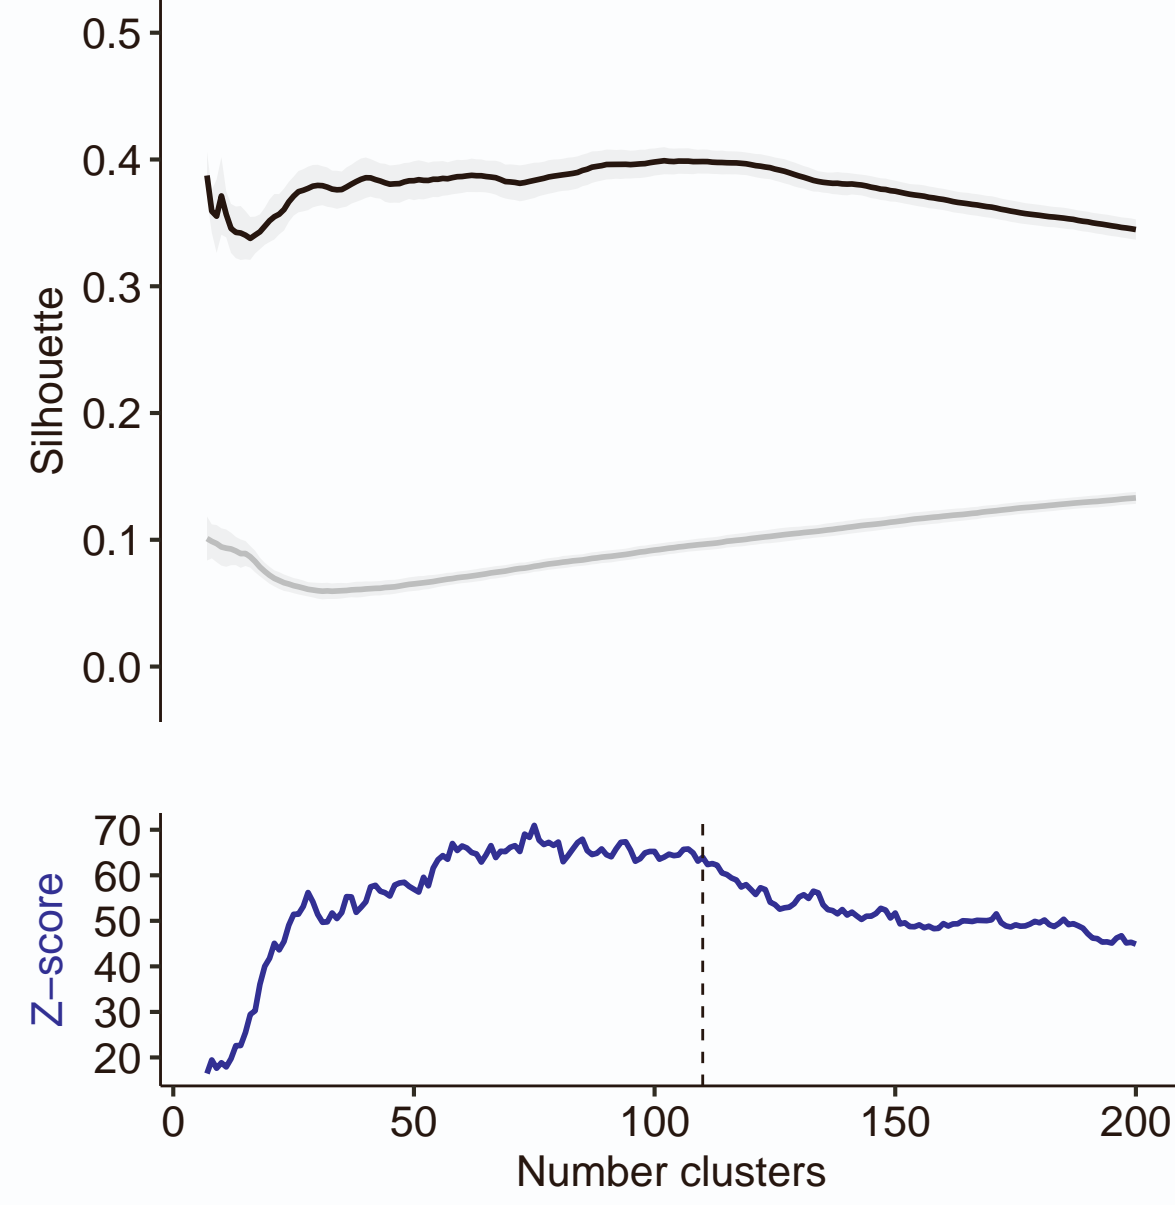

## Global UMAP: Pathway ON

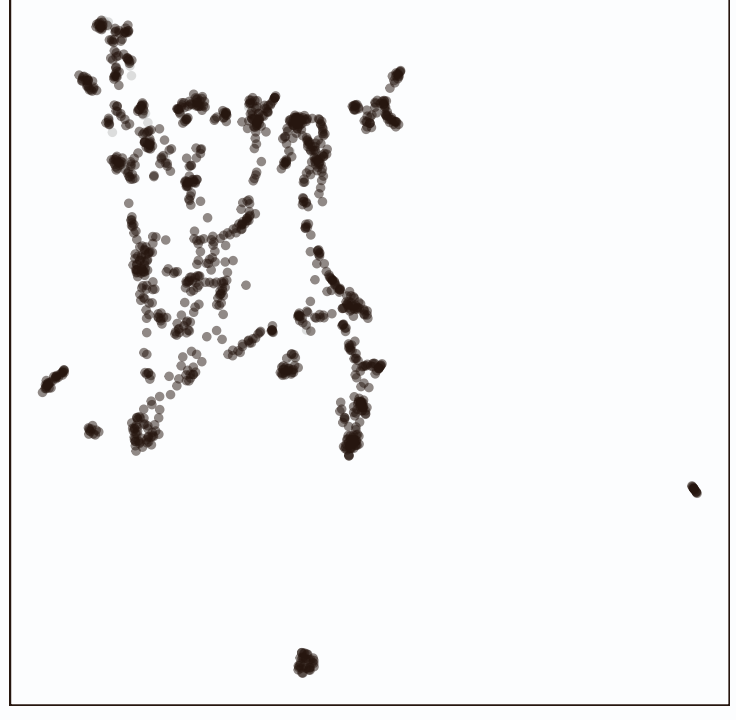

## ECDF of Profile Dispersions

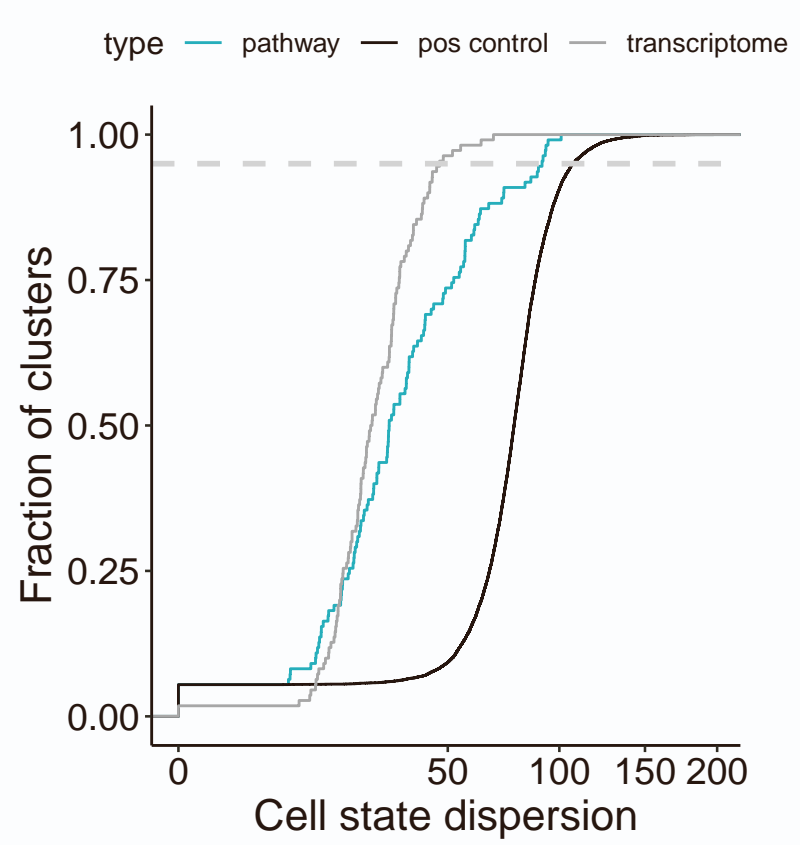

## Profile Dispersion Plot

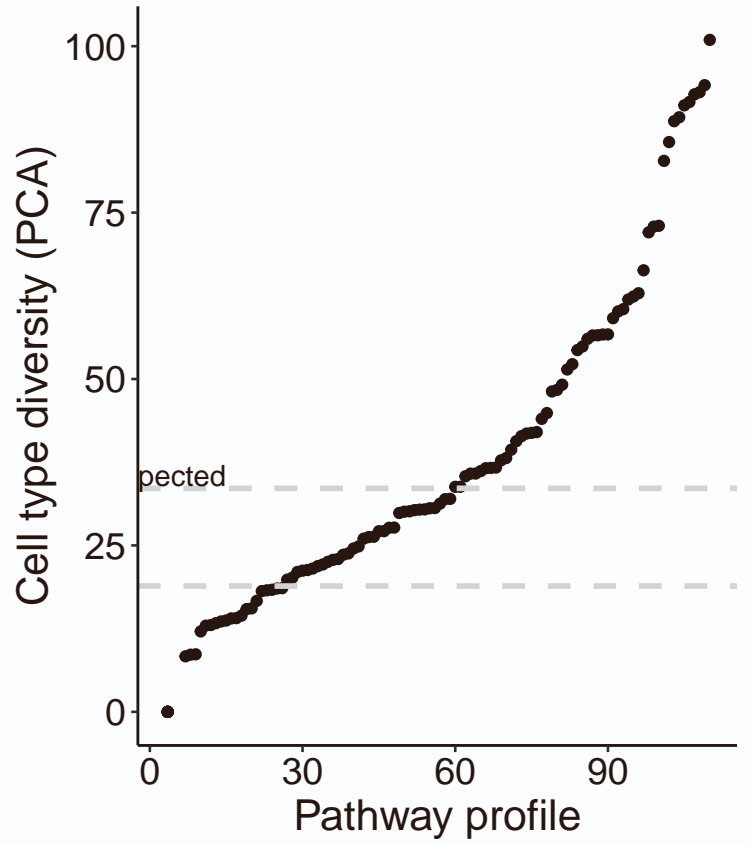

## Motifs, Dispersion $\geq 90^{\text{th}}$ percentile

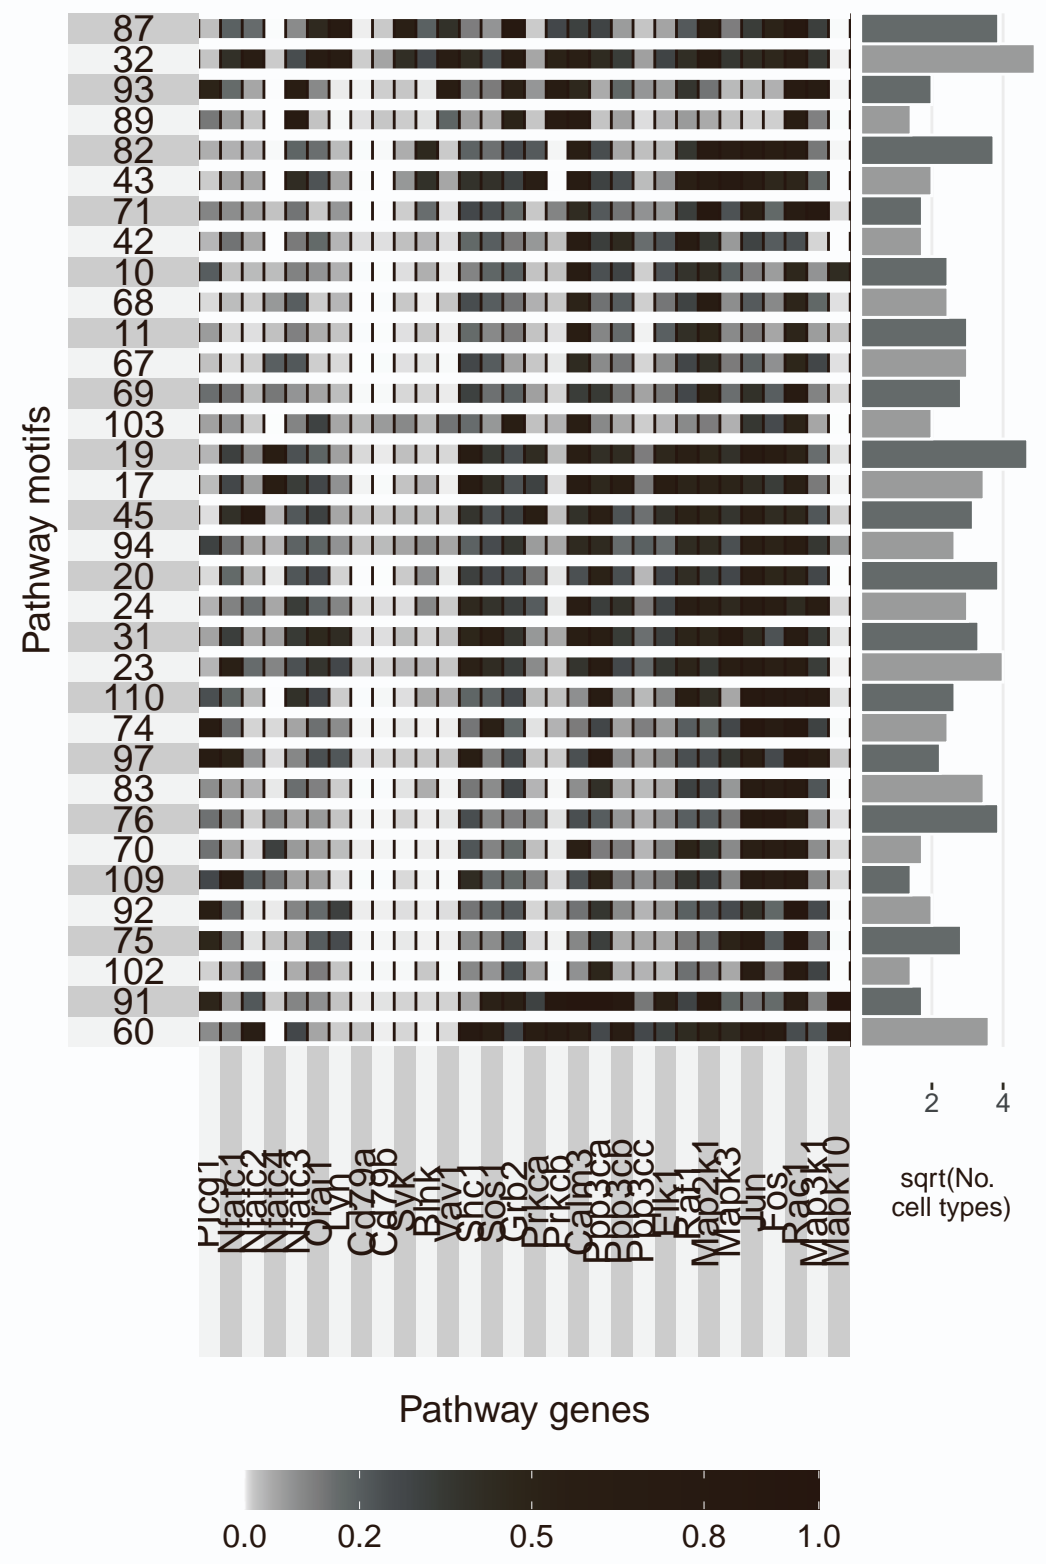

## Motif Tissue Composition

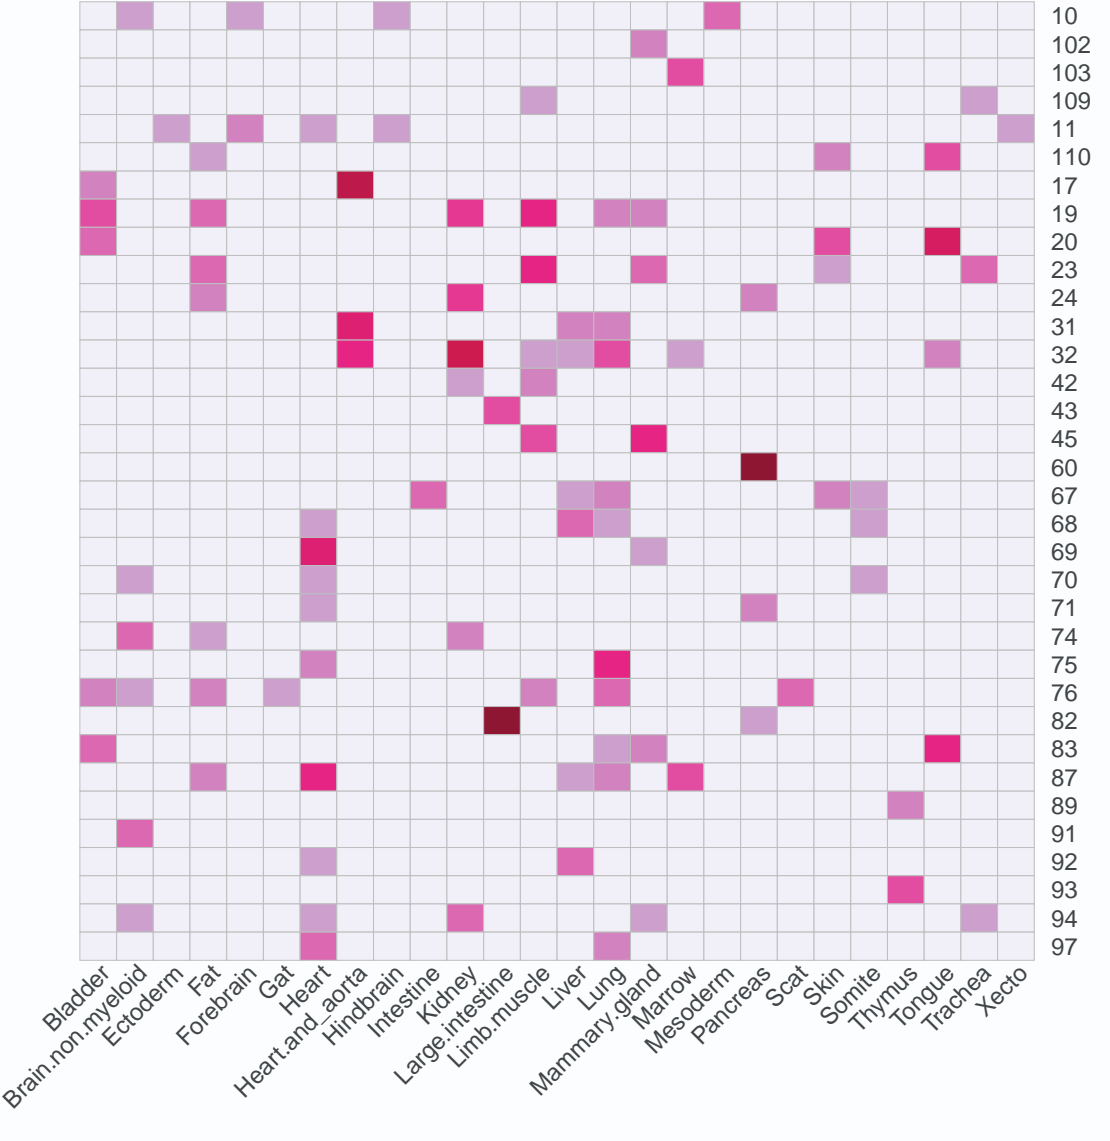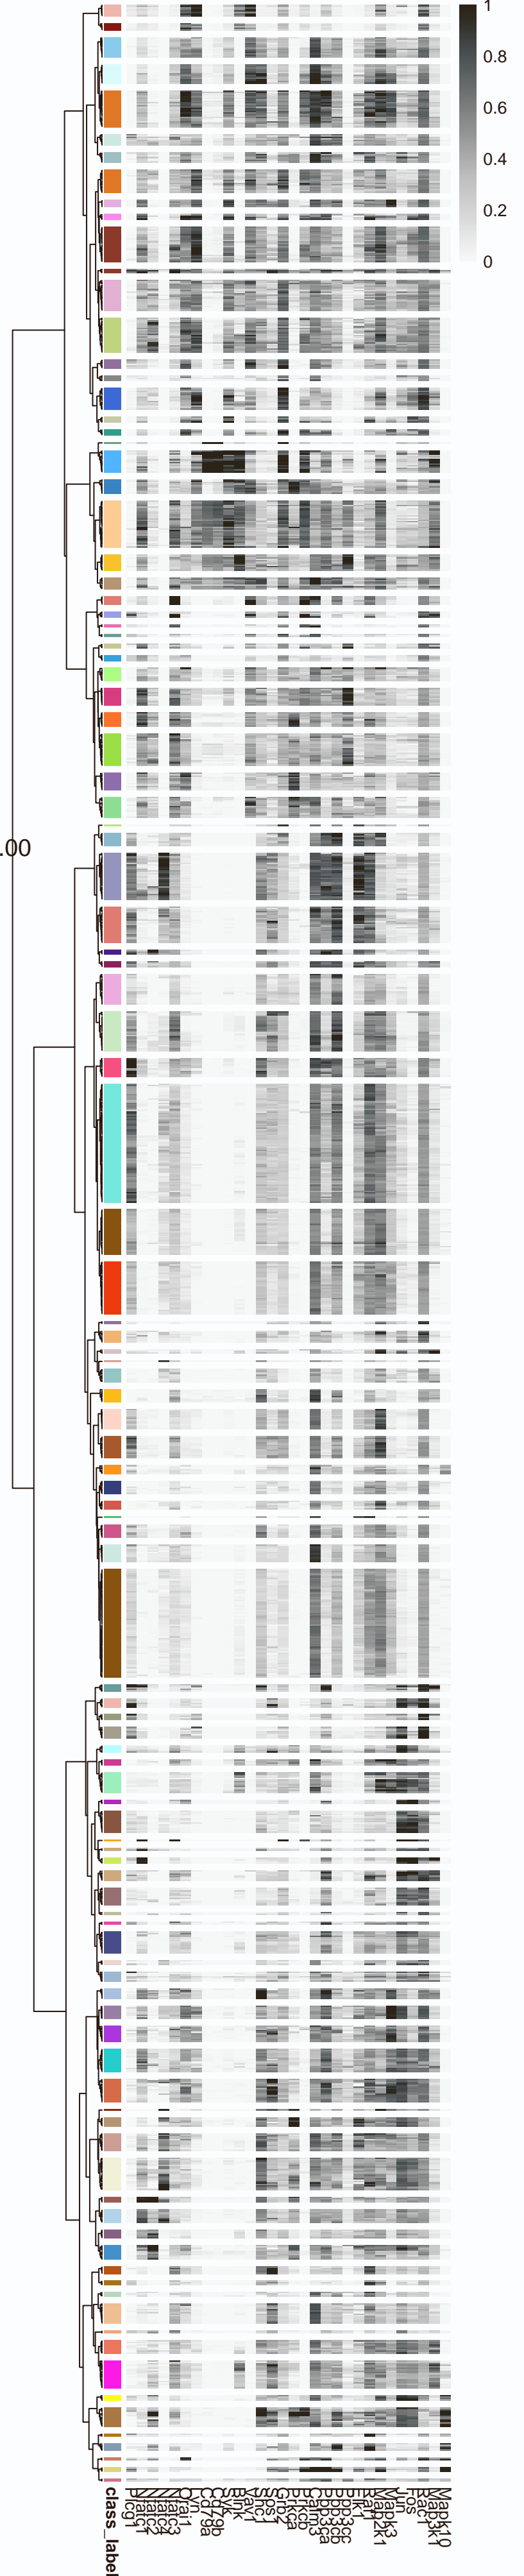

# BCR Signaling Pathway (k\_opt = 110)

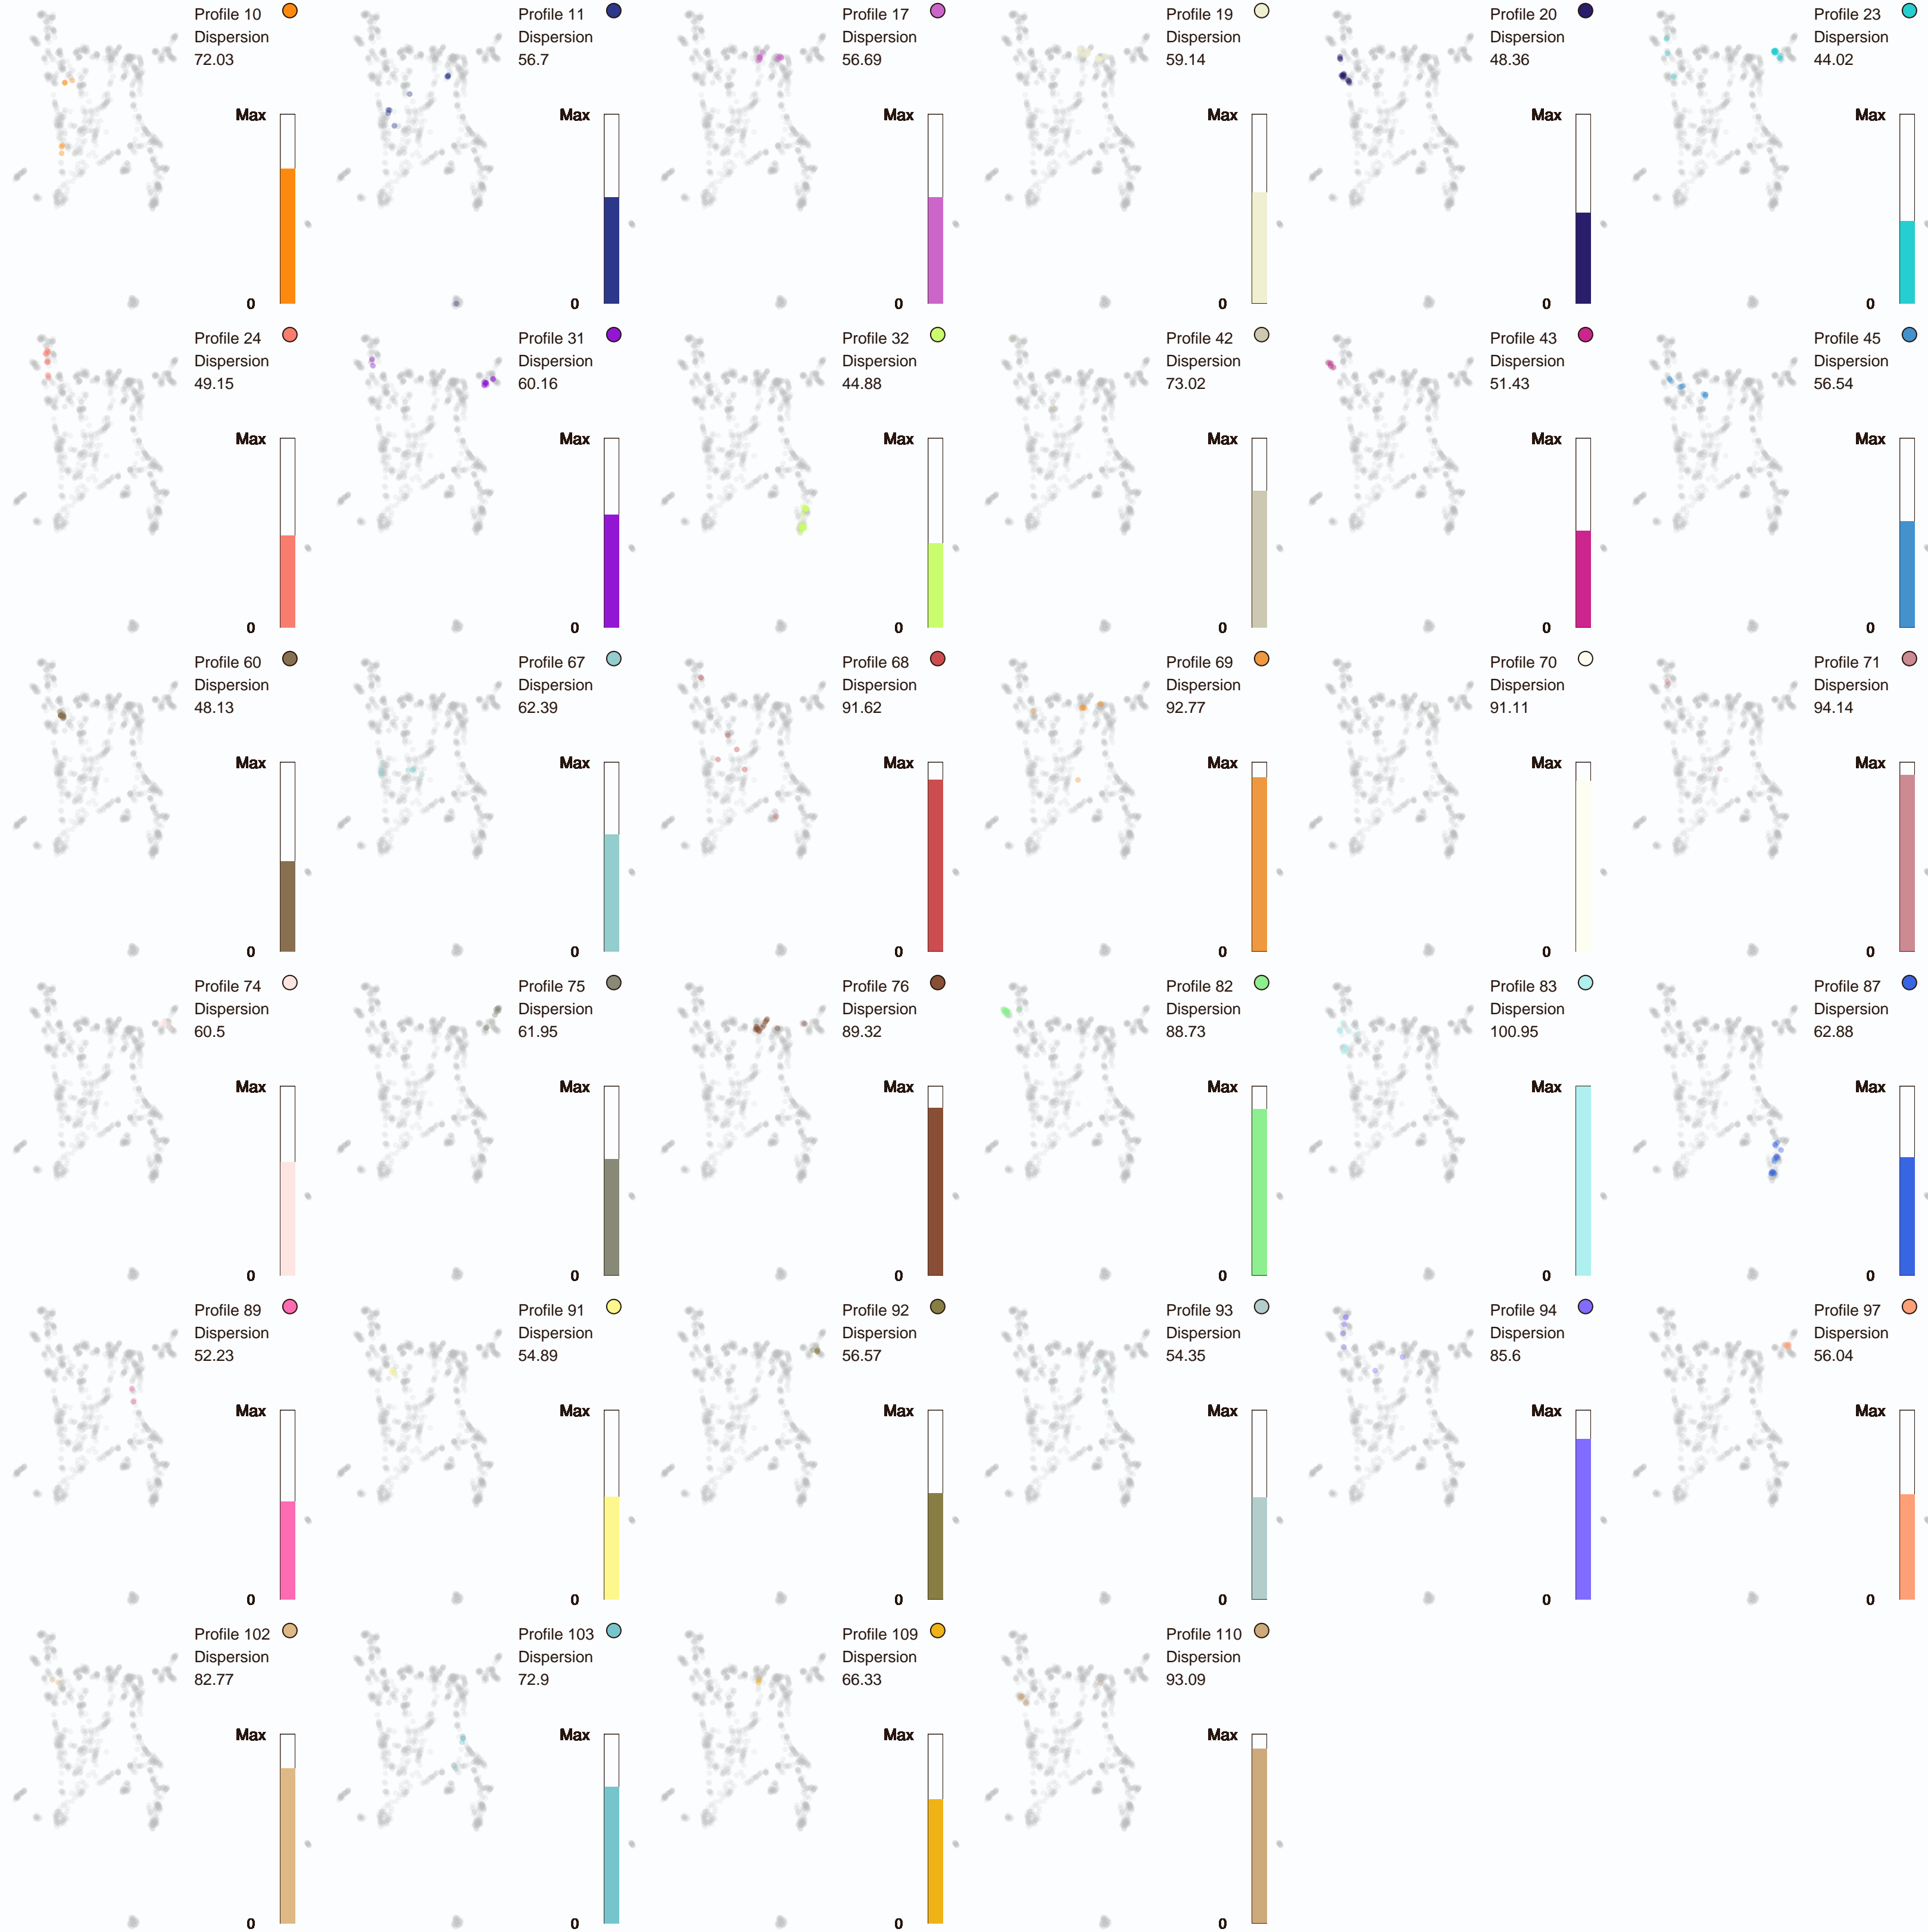

# CD40L Signalling Pathway (k\_opt = 67)

Pathway genes

|        |        |         |
|--------|--------|---------|
| Cd40   | Map3k1 | Ikbkg   |
| Traf3  | Dusp1  | Nfkb1   |
| Traf6  | Chuk   | Nfkbia  |
| Mapk14 | Ikbkb  | Tnfaip3 |

## Gene Co-Expression Above Threshold

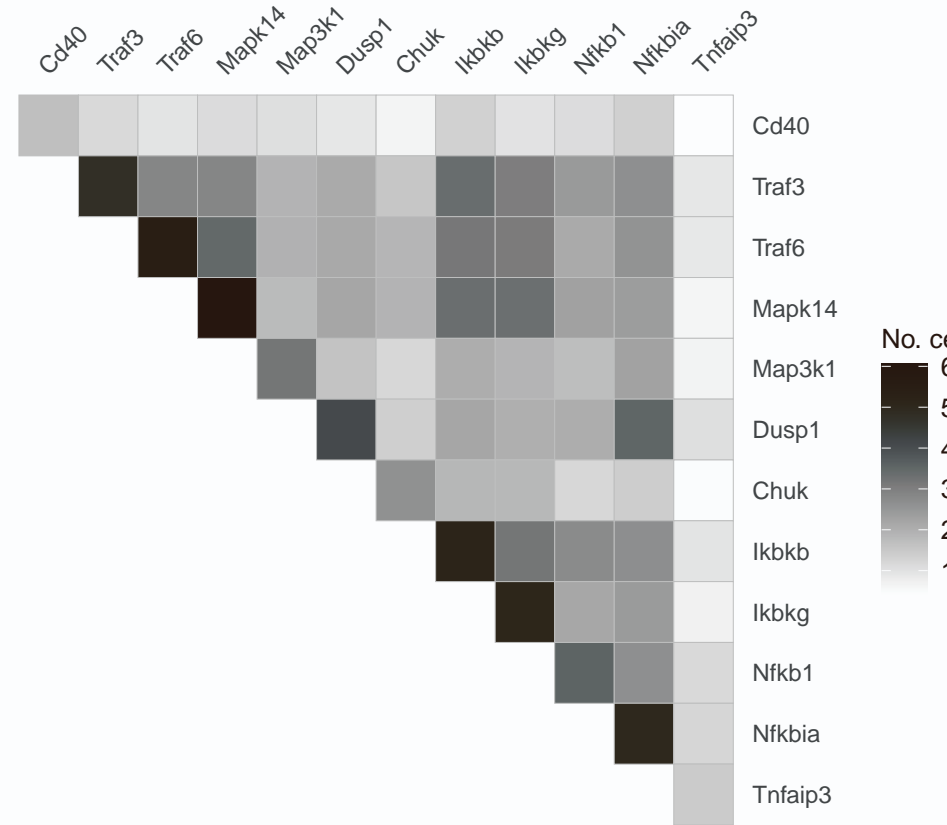

## Silhouette and Z-score

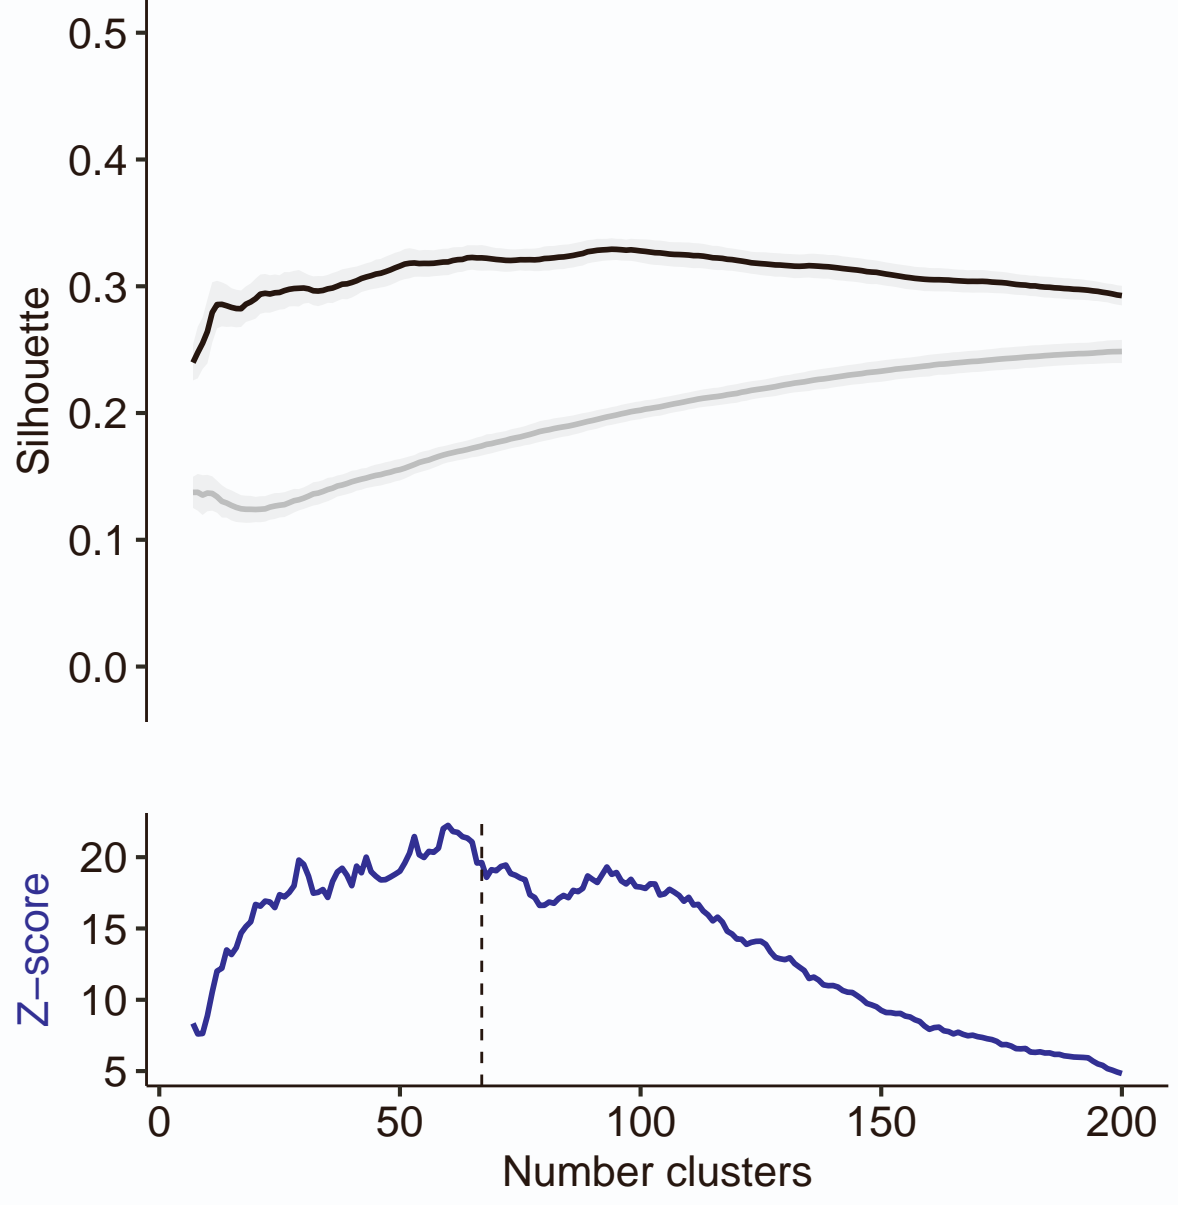

## Global UMAP: Pathway ON

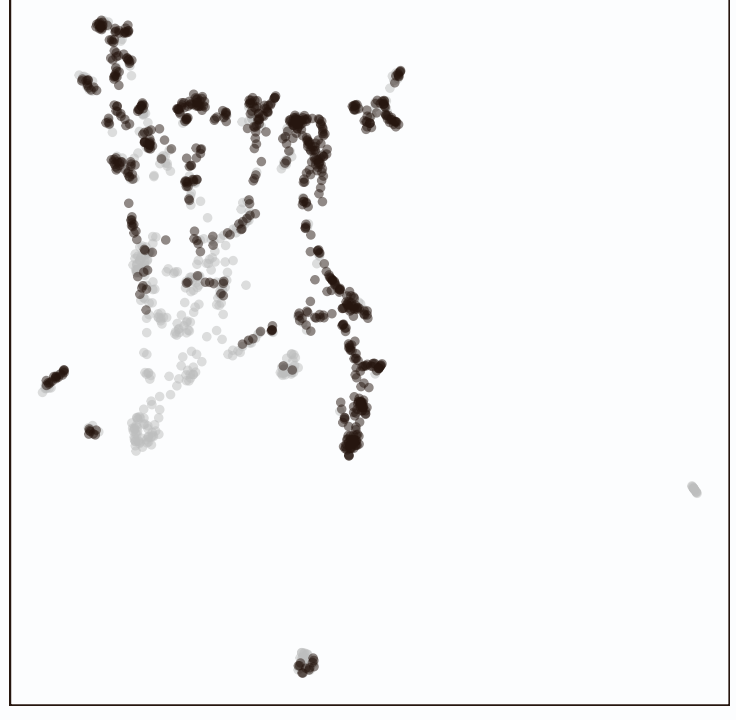

## ECDF of Profile Dispersions

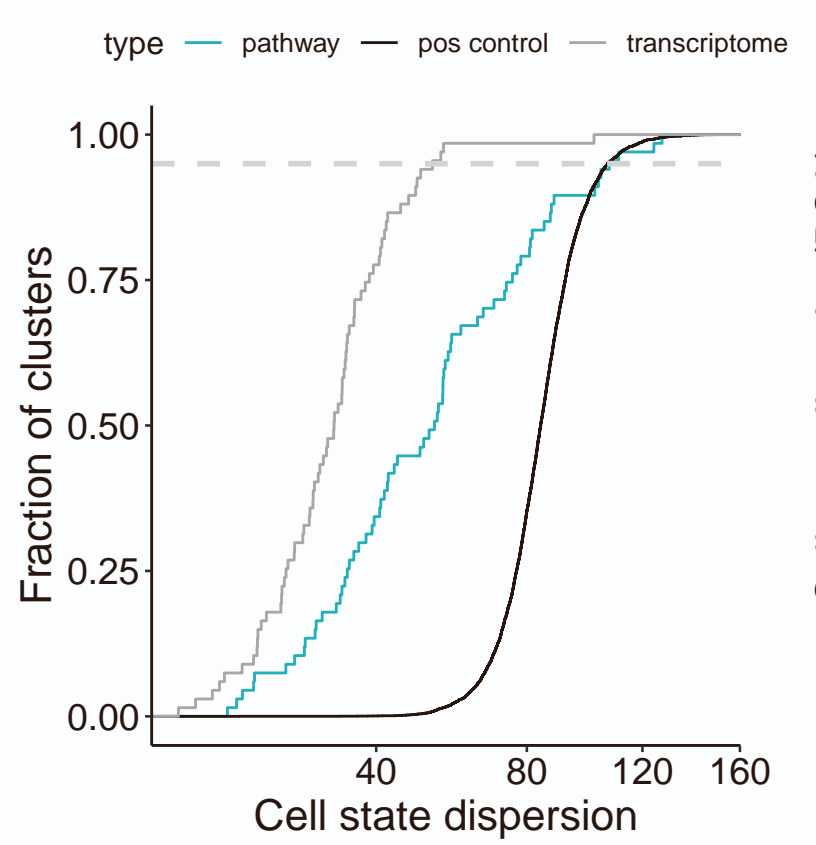

## Profile Dispersion Plot

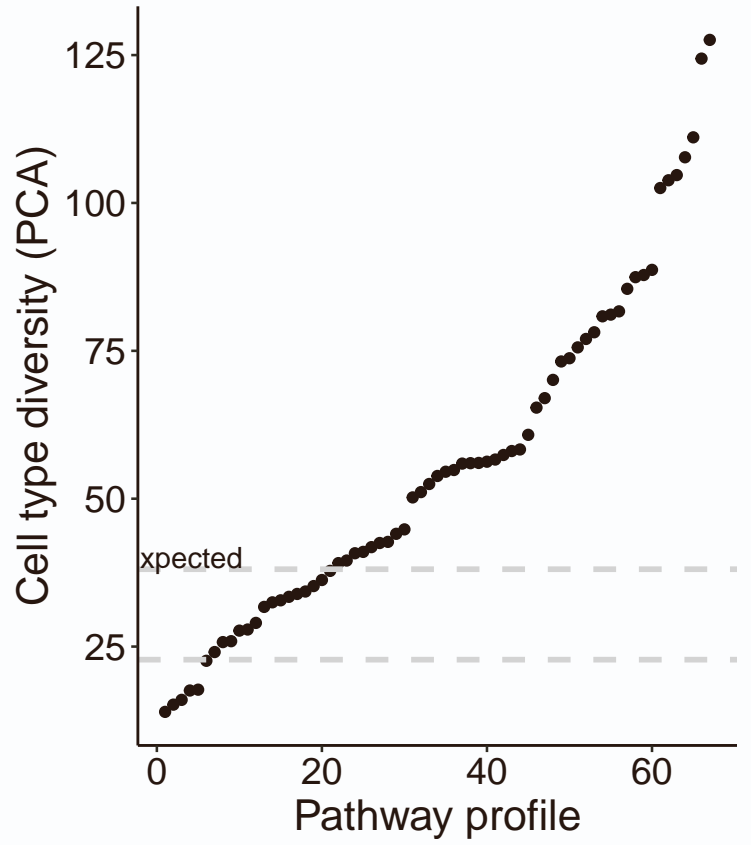

## Motifs, Dispersion $\geq 90^{\text{th}}$ percentile

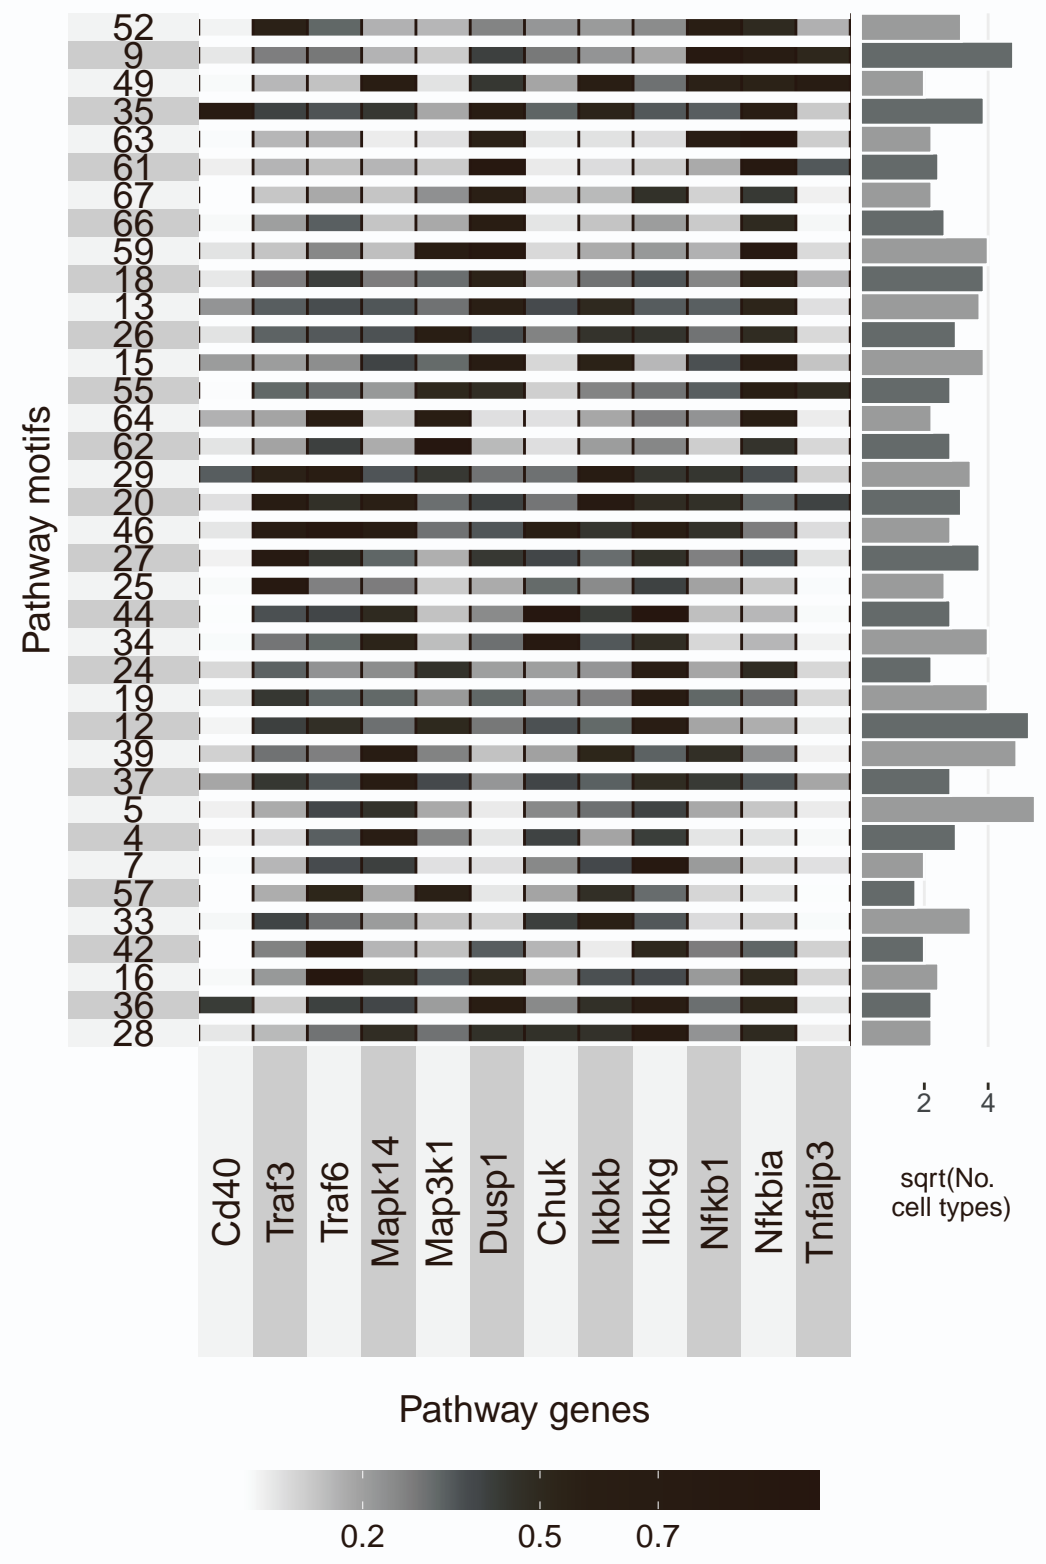

## Motif Tissue Composition

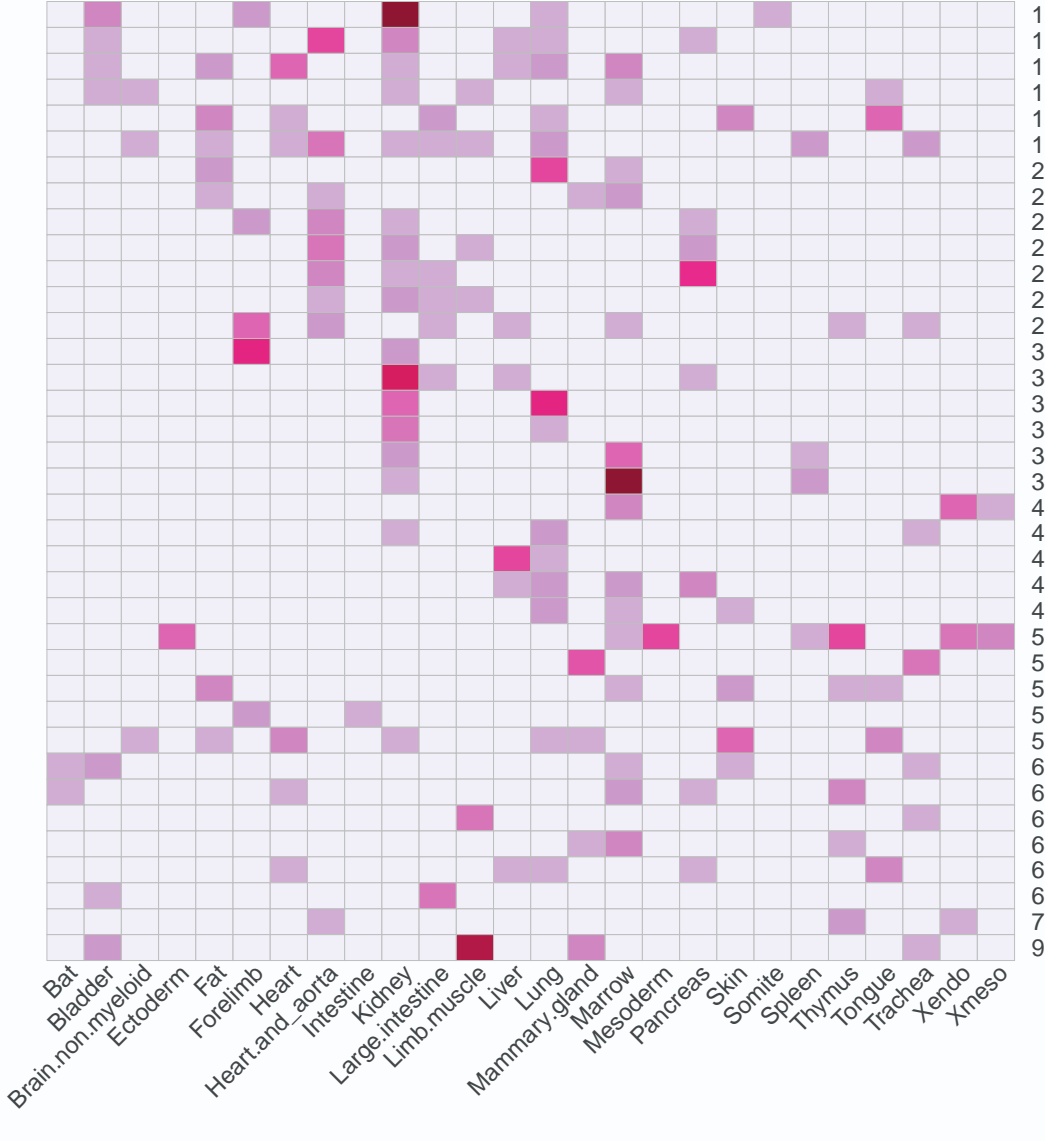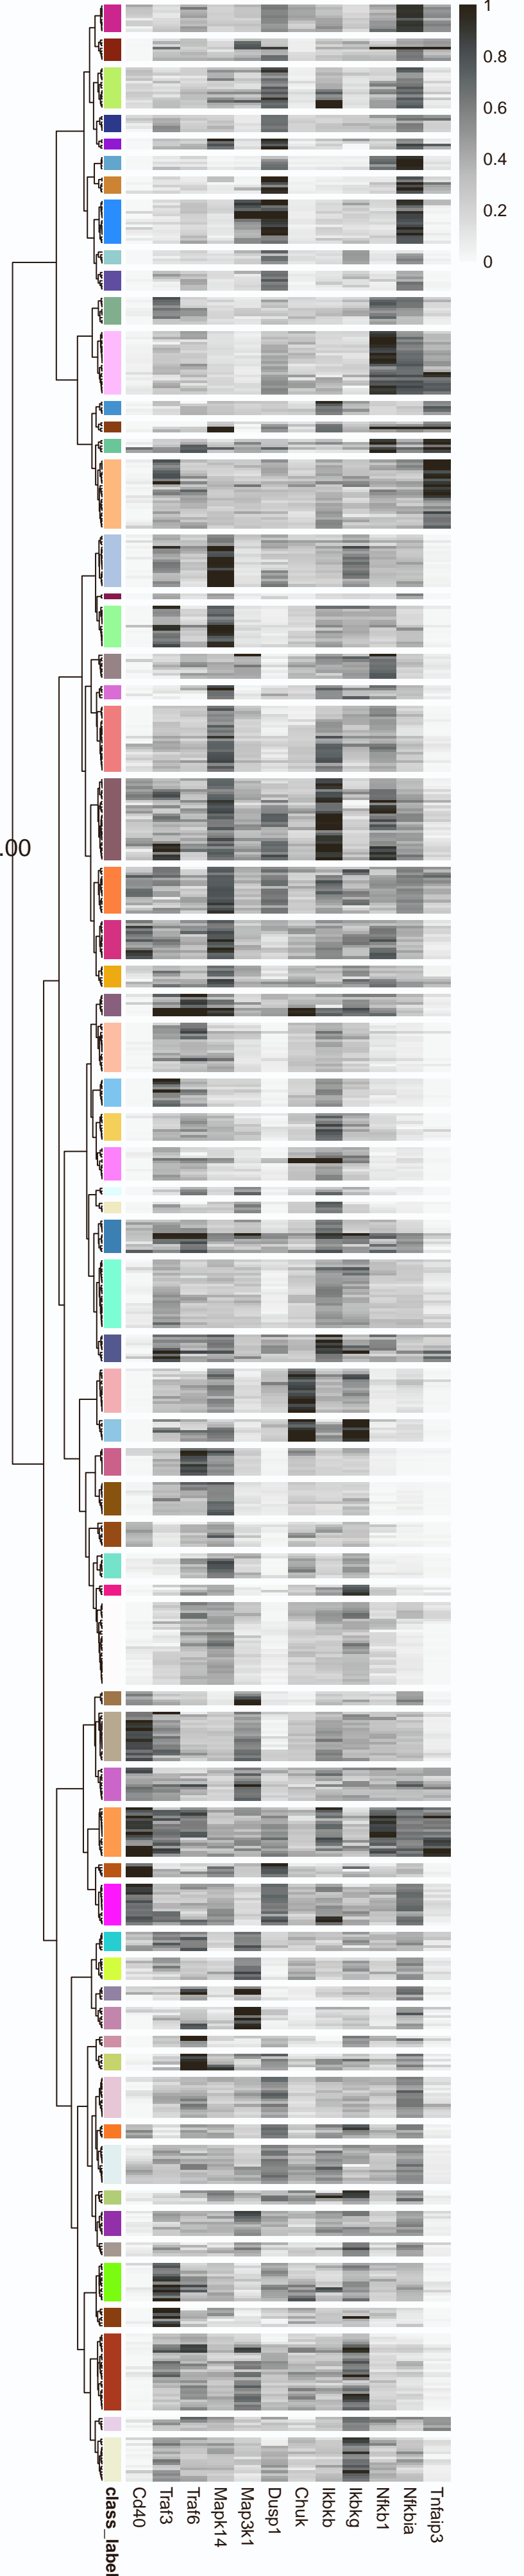

# CD40L Signalling Pathway (k\_opt = 67)

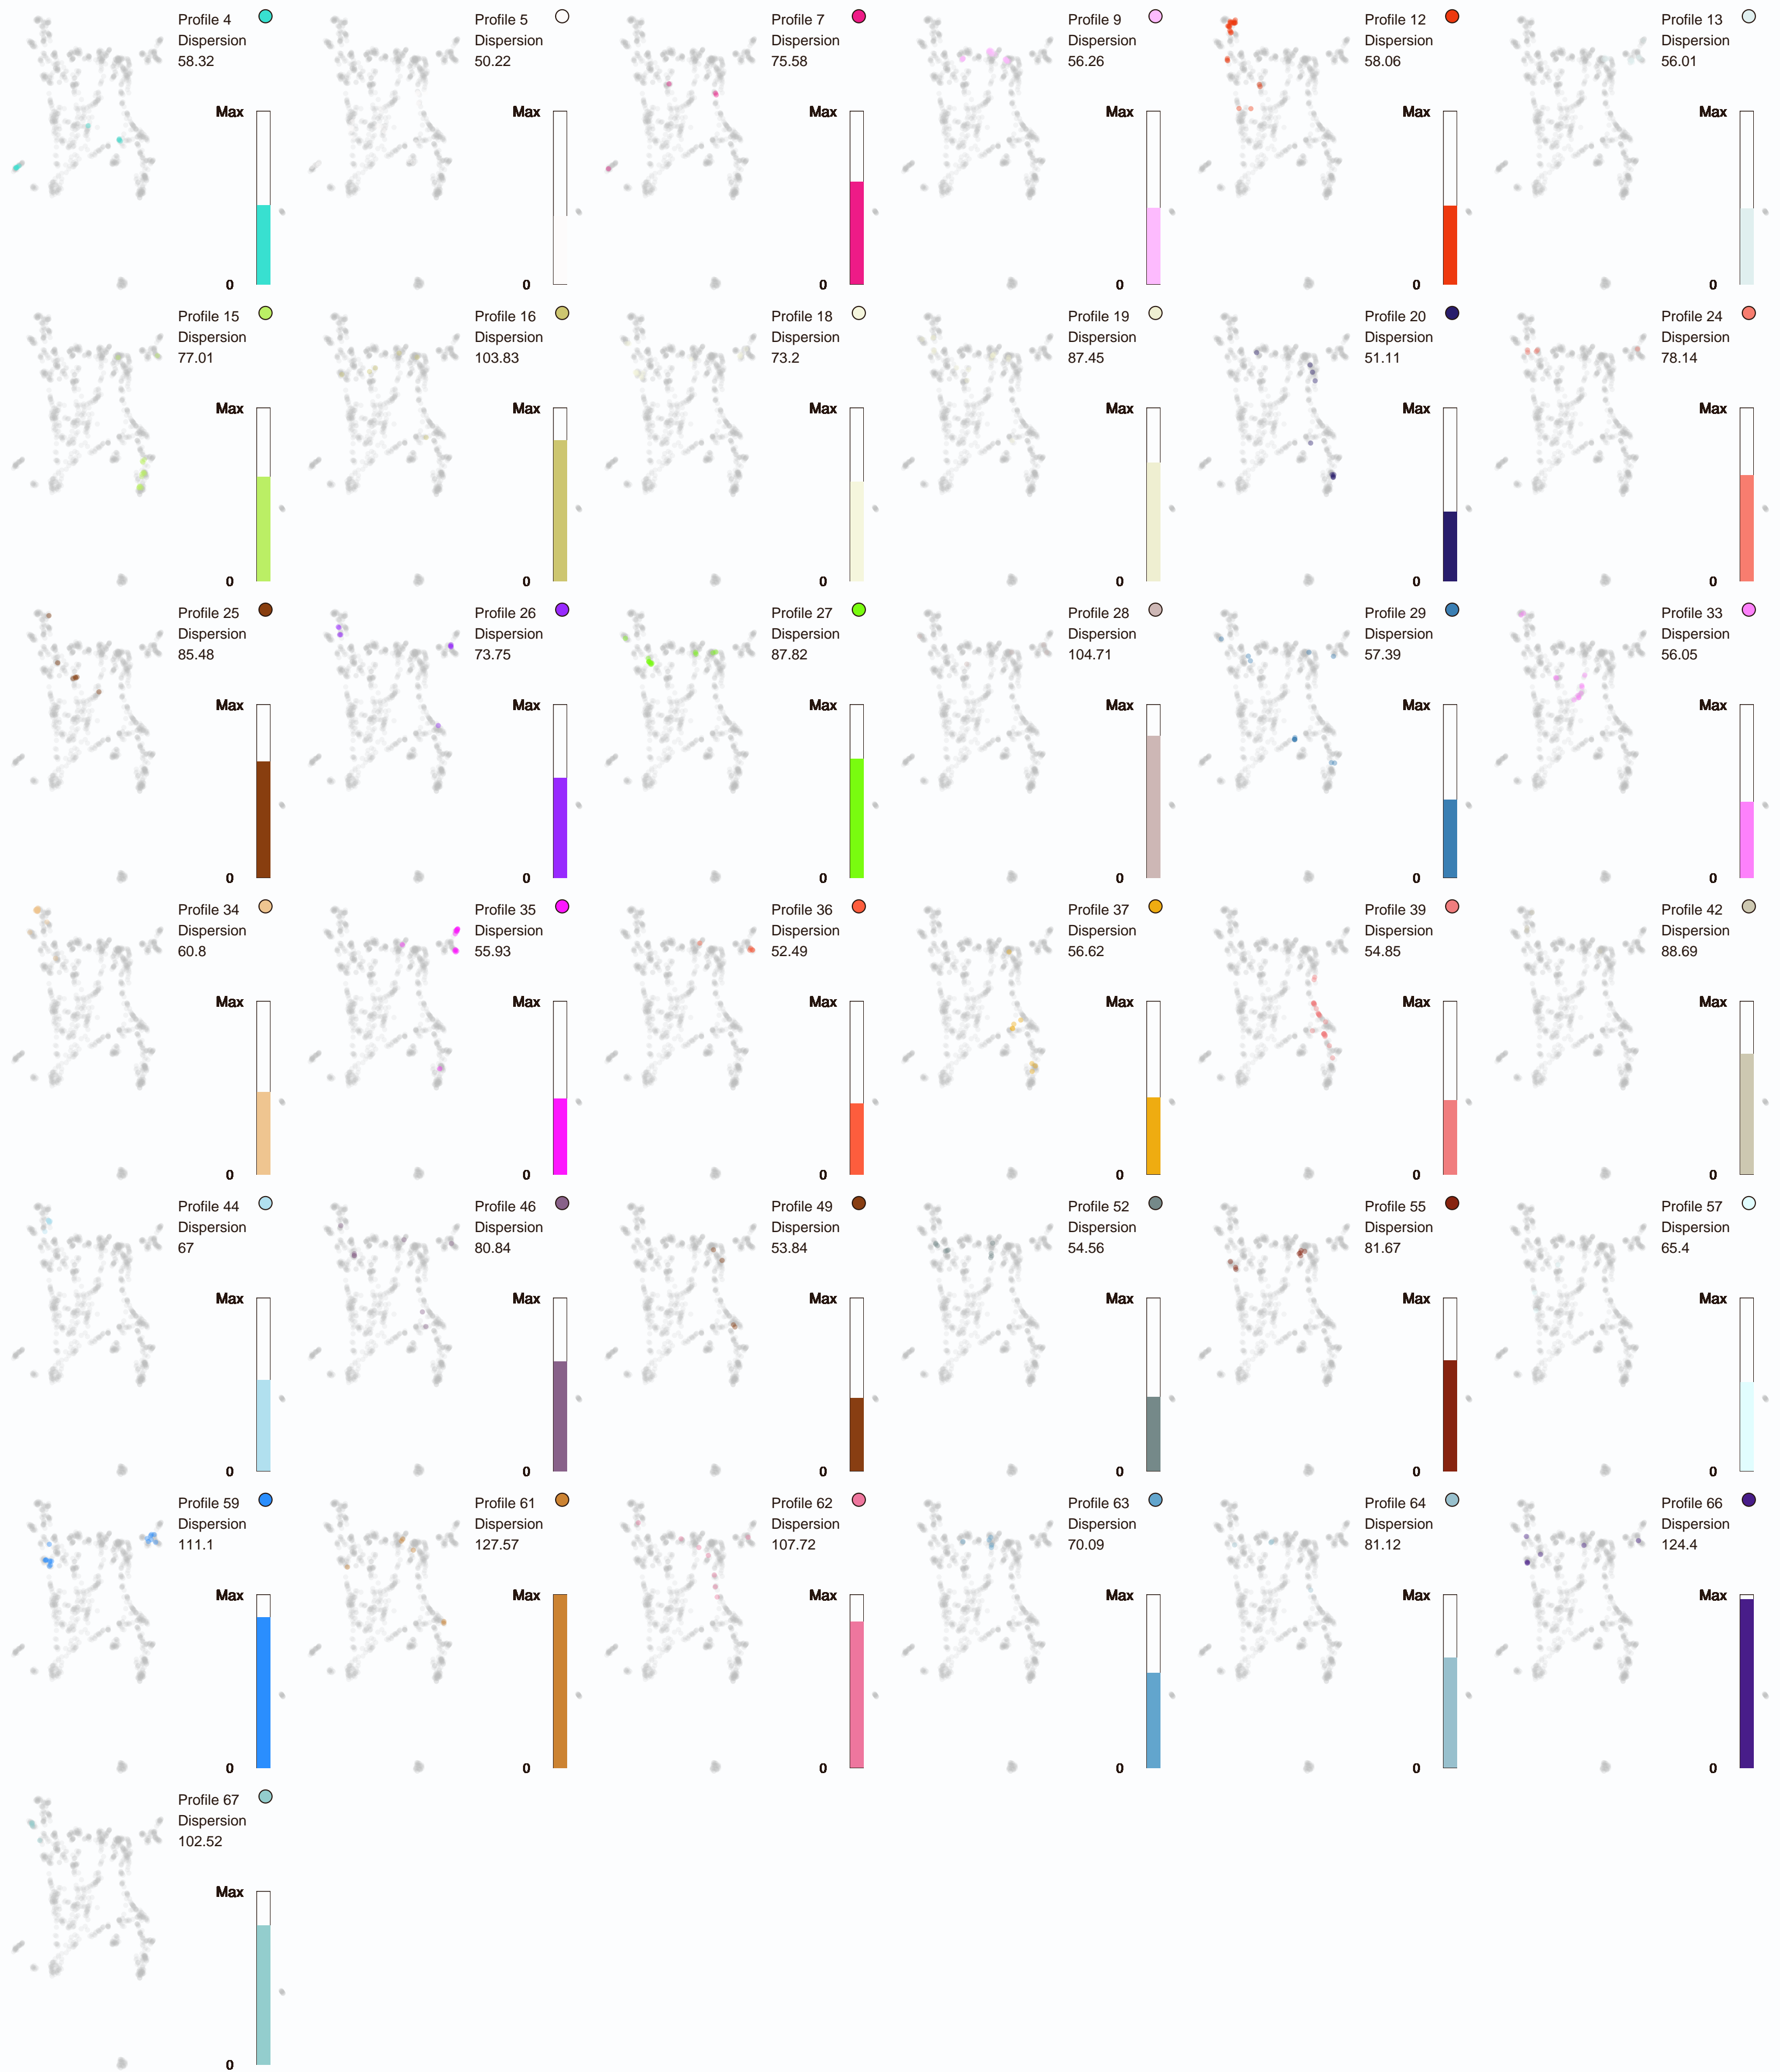

# D4-GDI Signaling Pathway (k\_opt = 77)

Casp3  
Cycs  
Apaf1  
Casp9

Pathway genes  
Casp8  
Arhgdib  
Arhgap32

Jun  
Arhgap5  
Parp1

Gene Co-Expression Above Threshold

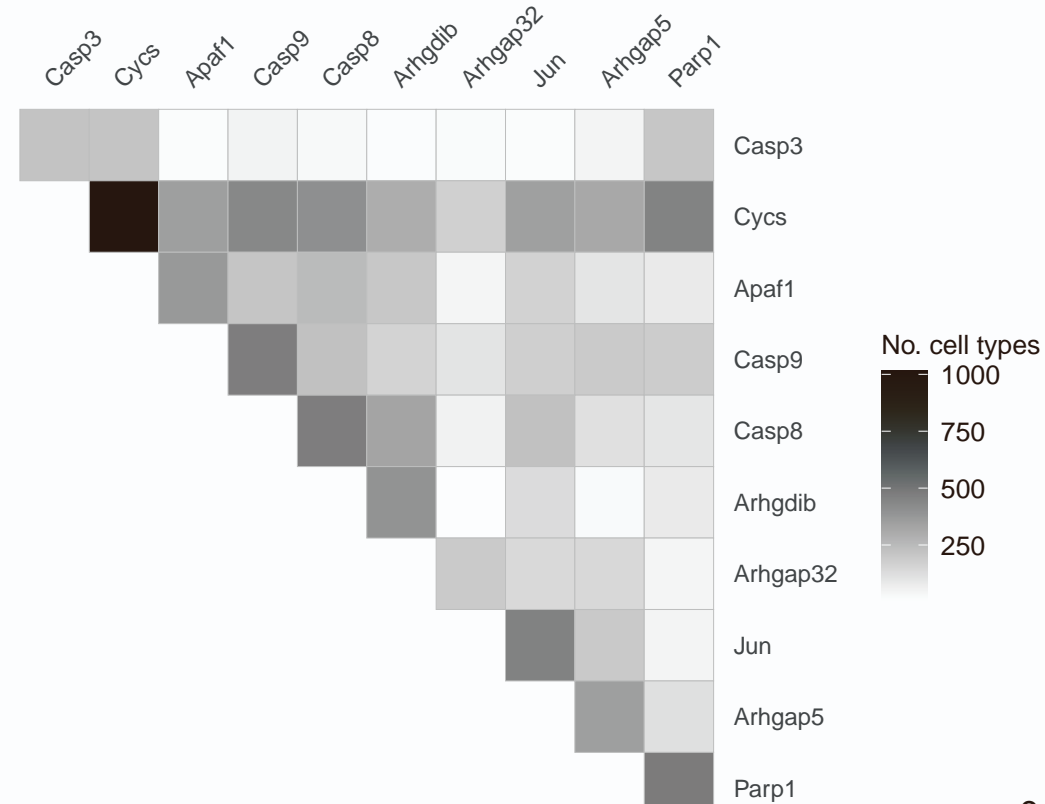

Silhouette and Z-score

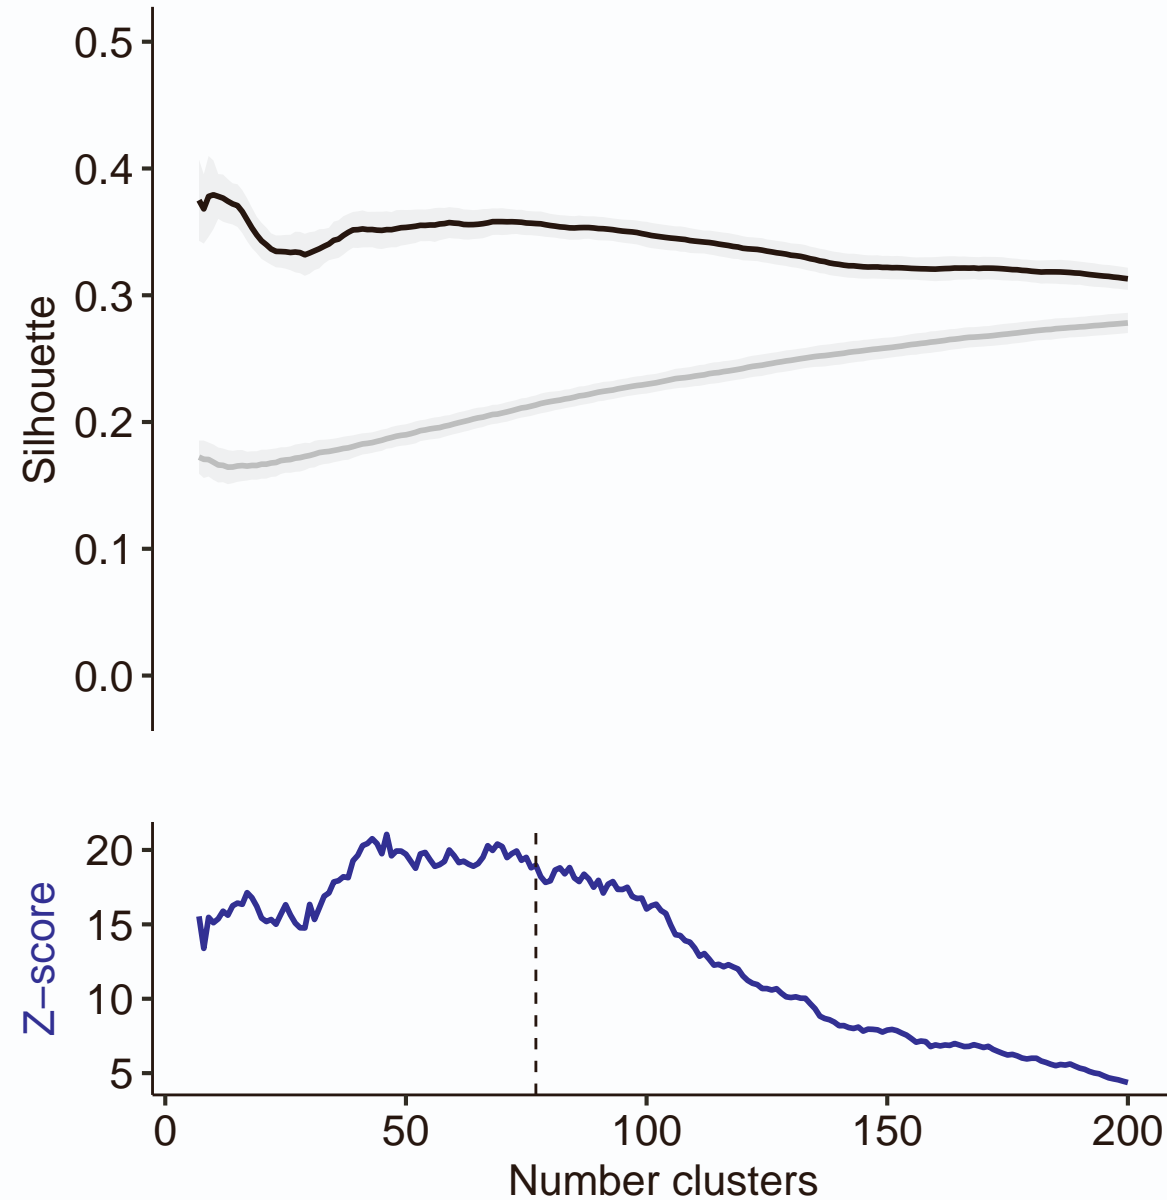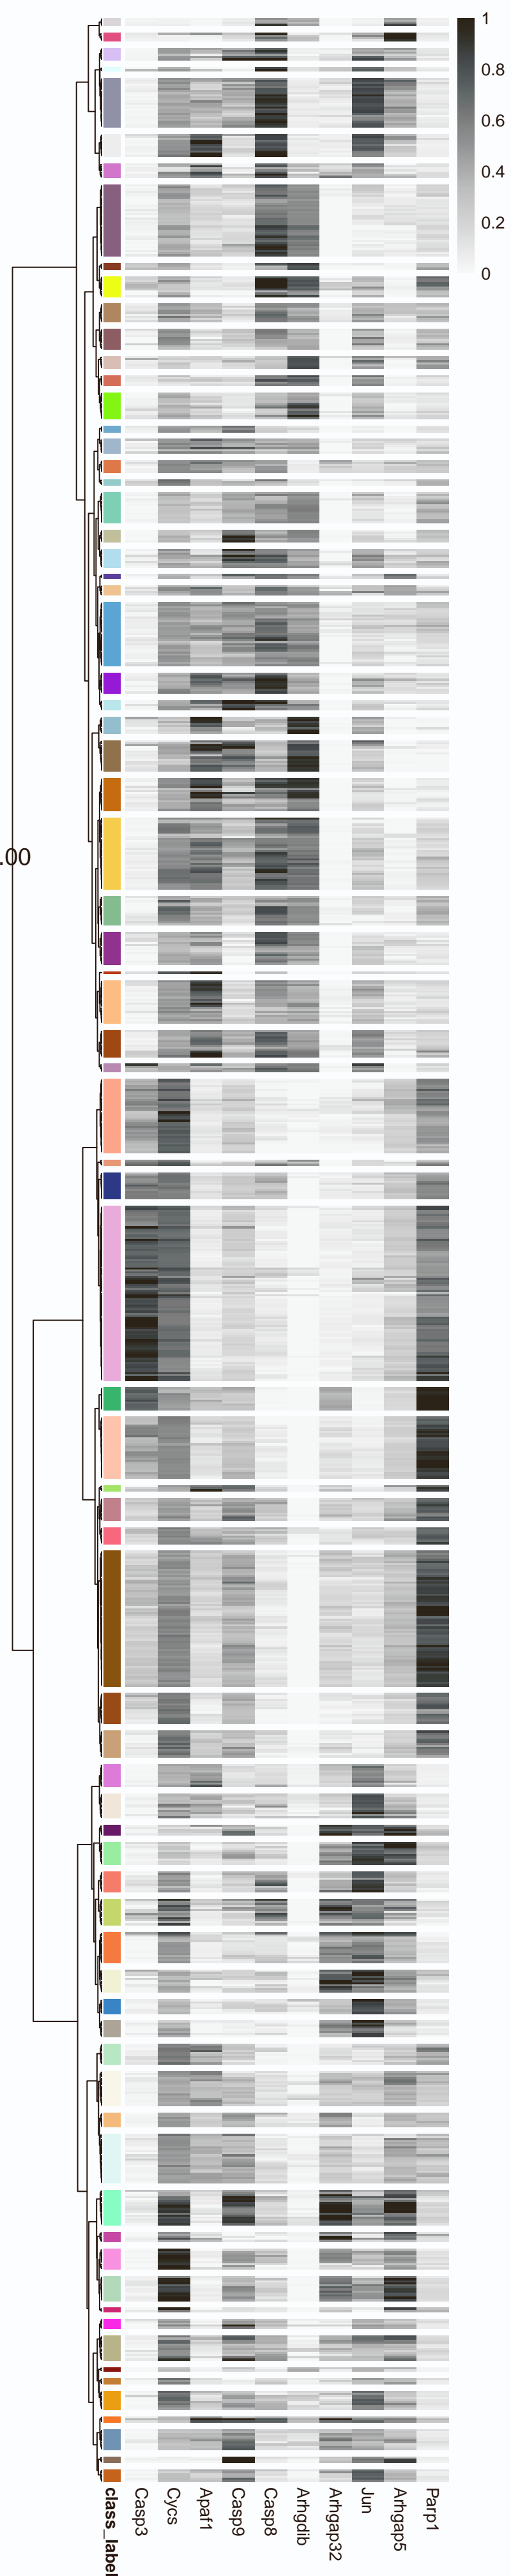

Global UMAP: Pathway ON

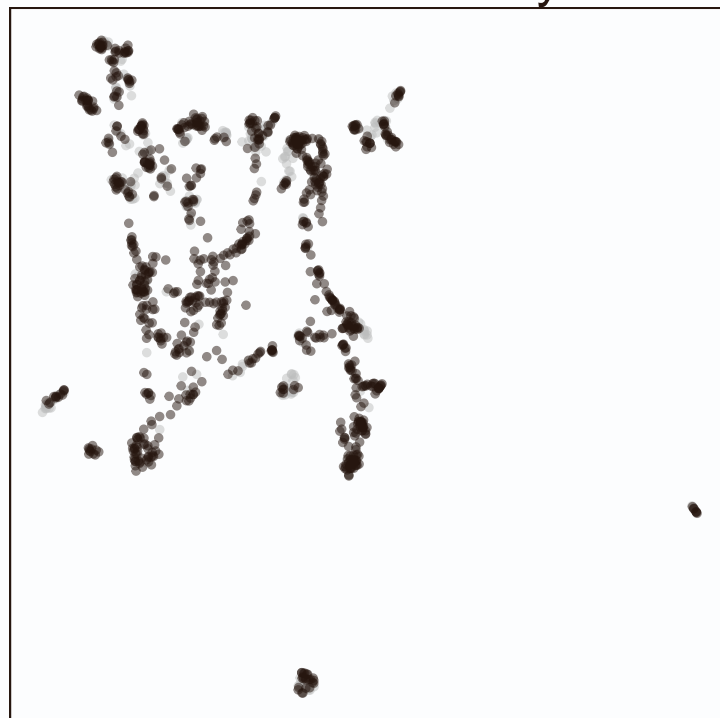

ECDF of Profile Dispersions

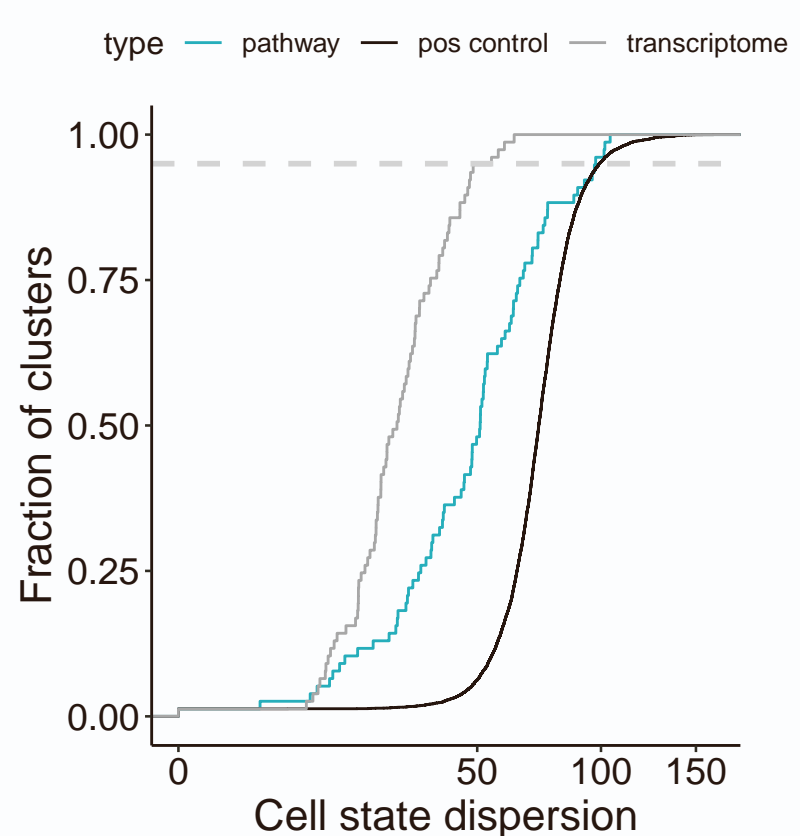

Profile Dispersion Plot

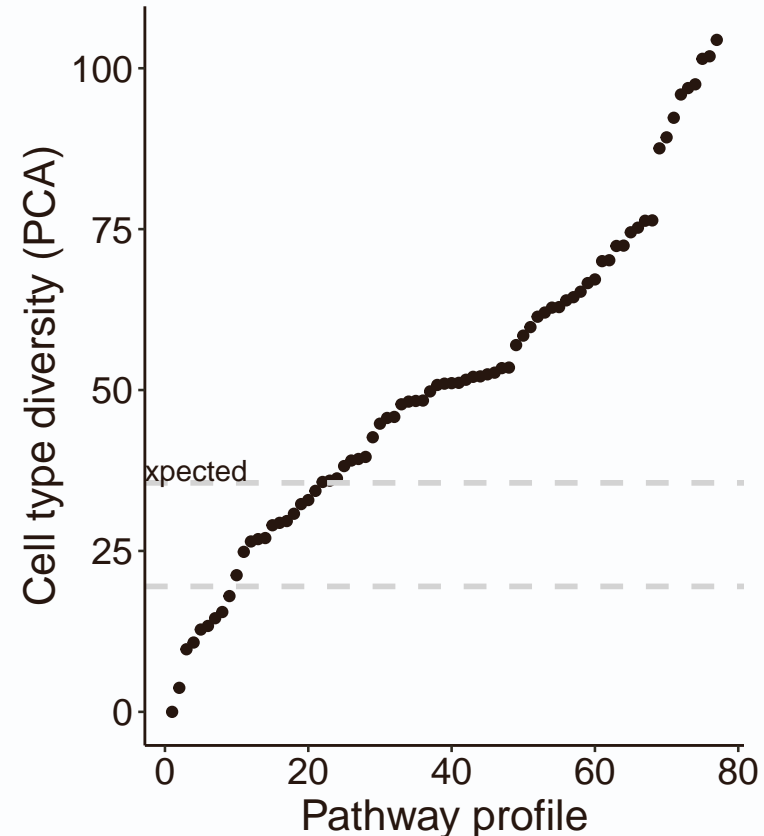

Motifs, Dispersion  $\geq 90^{\text{th}}$  percentile

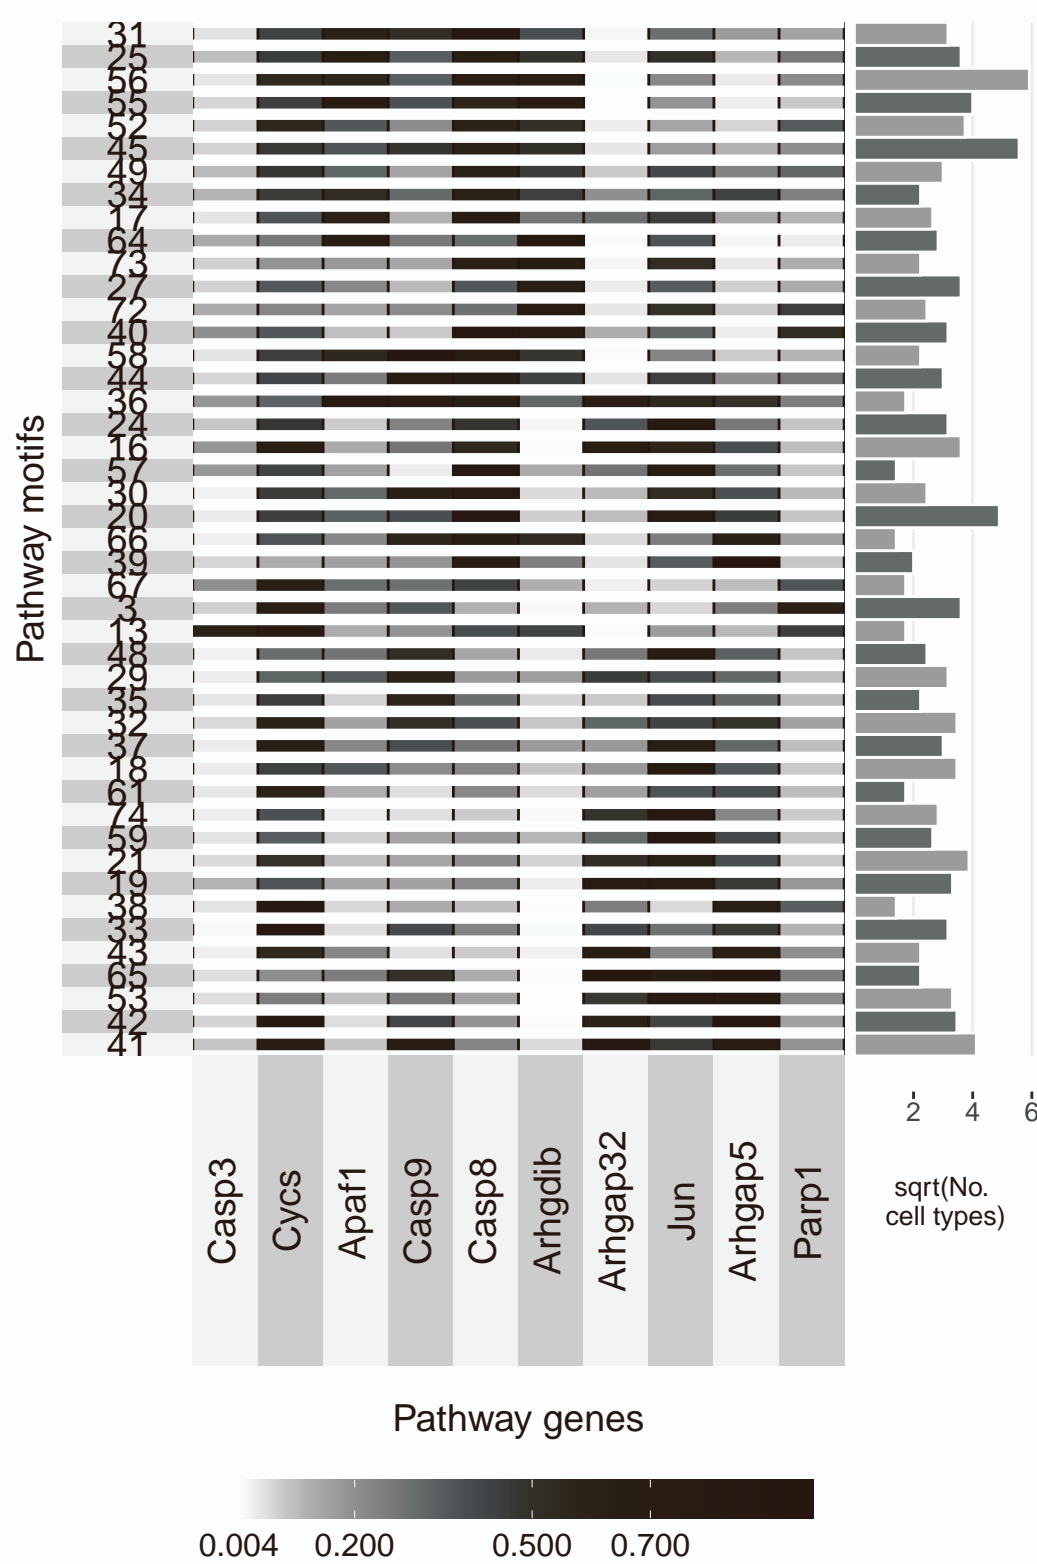

Motif Tissue Composition

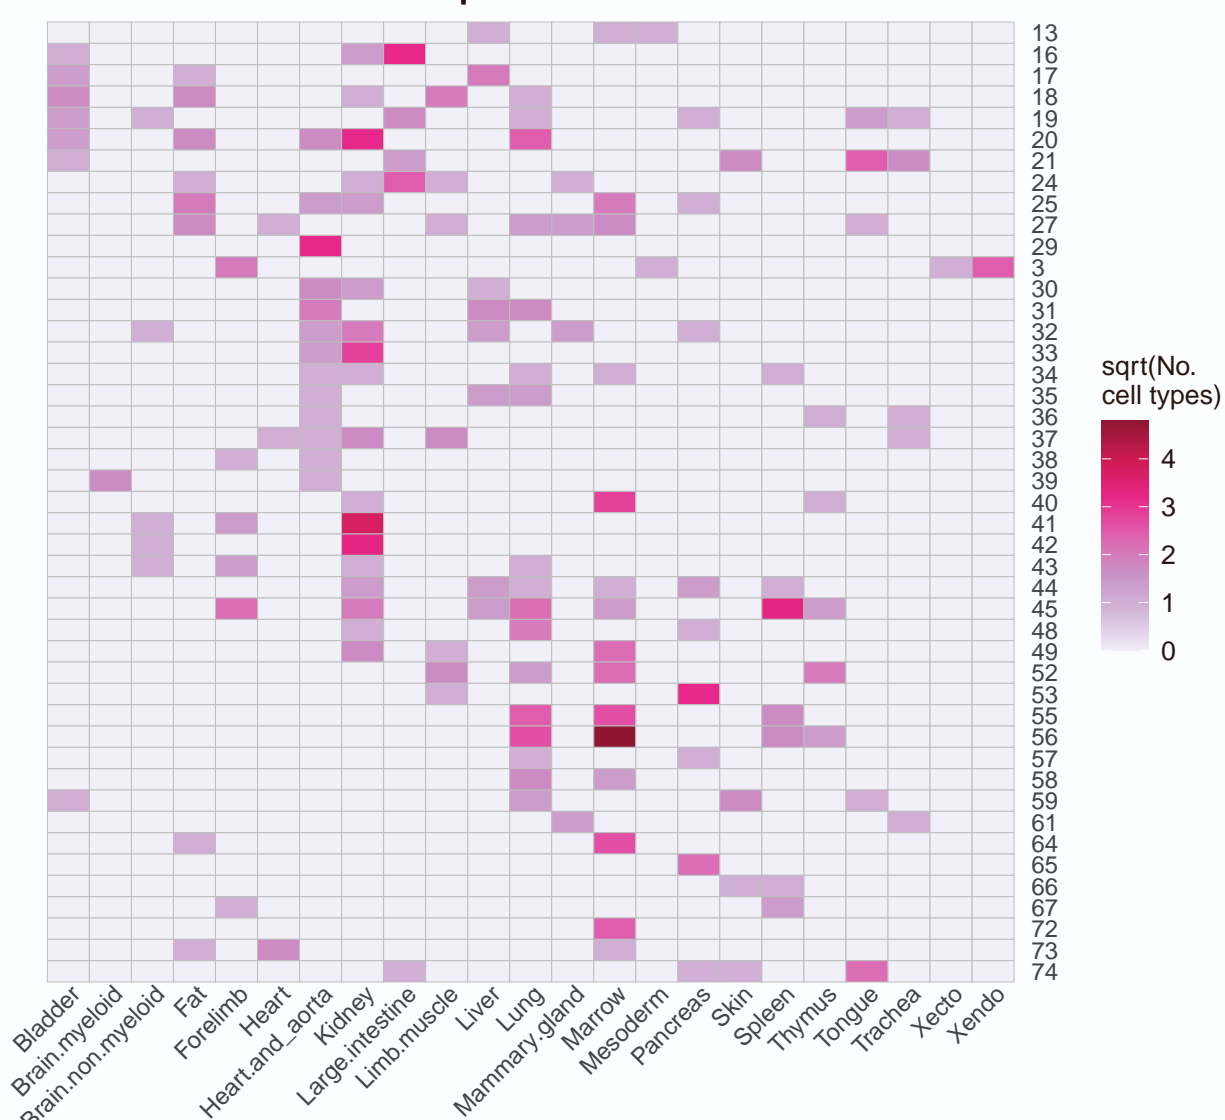

# D4-GDI Signaling Pathway (k\_opt = 77)

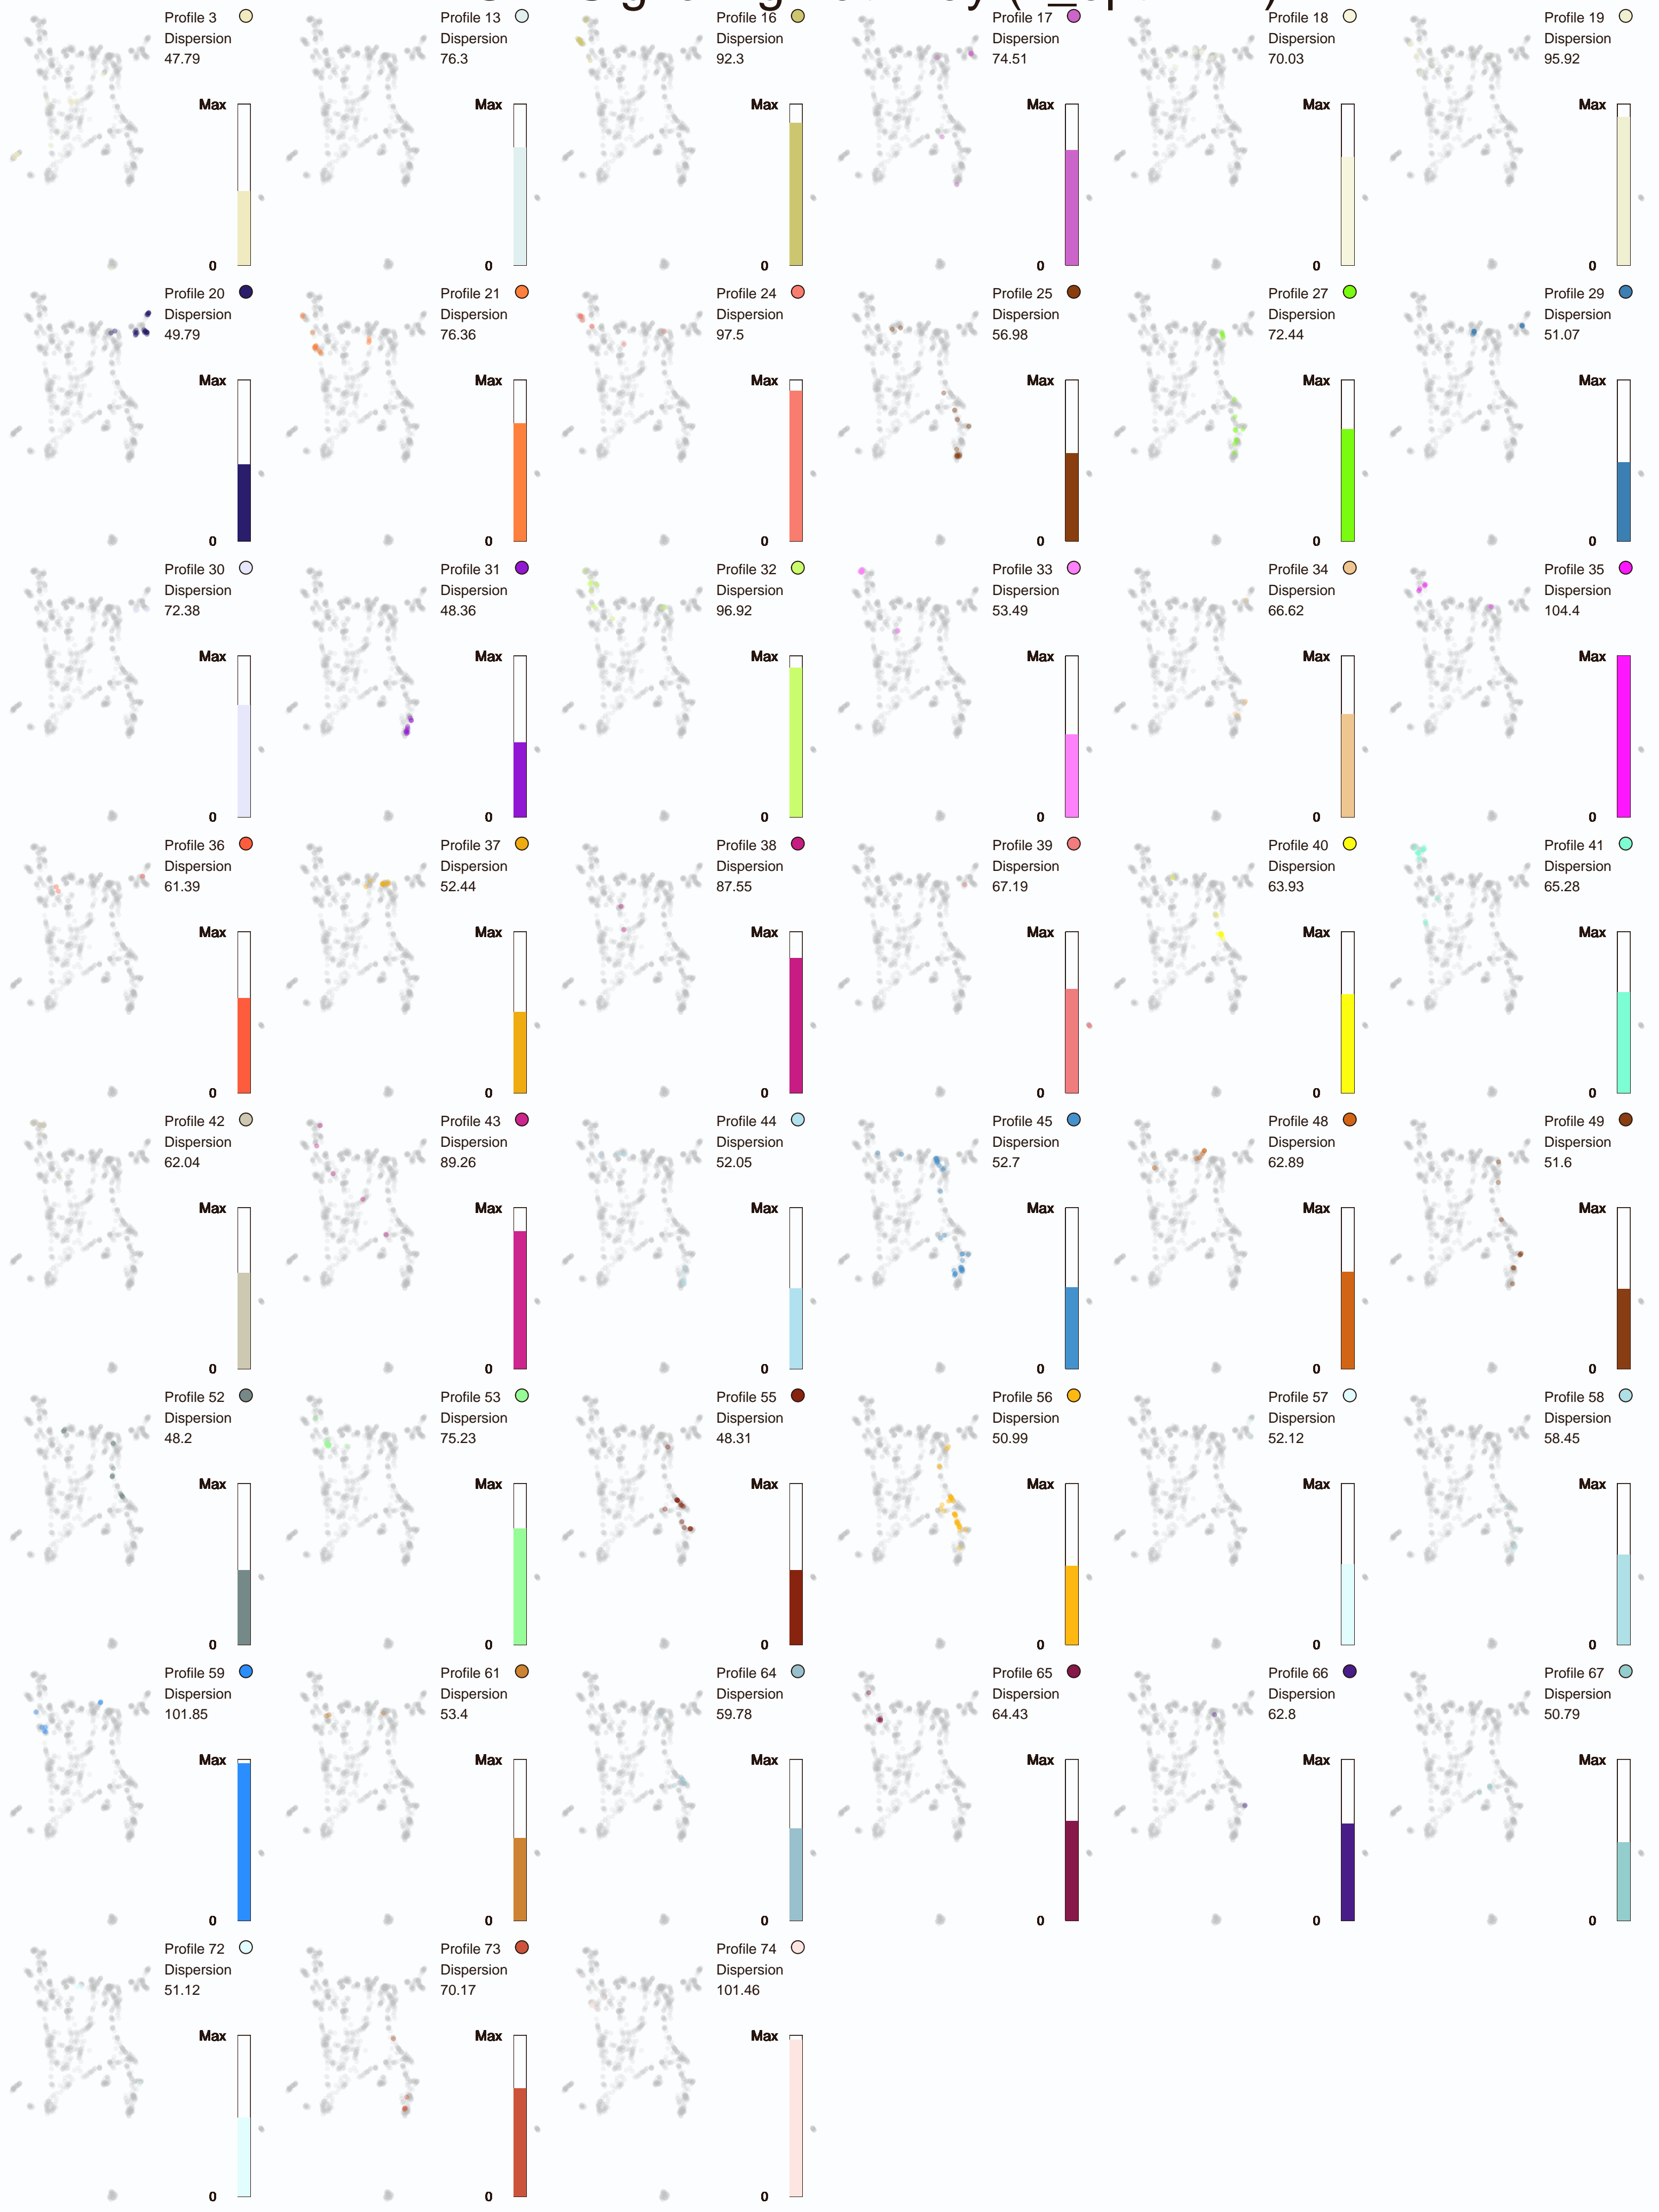

# Eph A-B receptors (k\_opt = 31)

Epha1  
Epha2  
Epha3  
Epha4

Pathway genes  
Epha5  
Epha7  
Ephb1

Ephb2  
Ephb3  
Ephb4  
Ephb6

## Gene Co-Expression Above Threshold

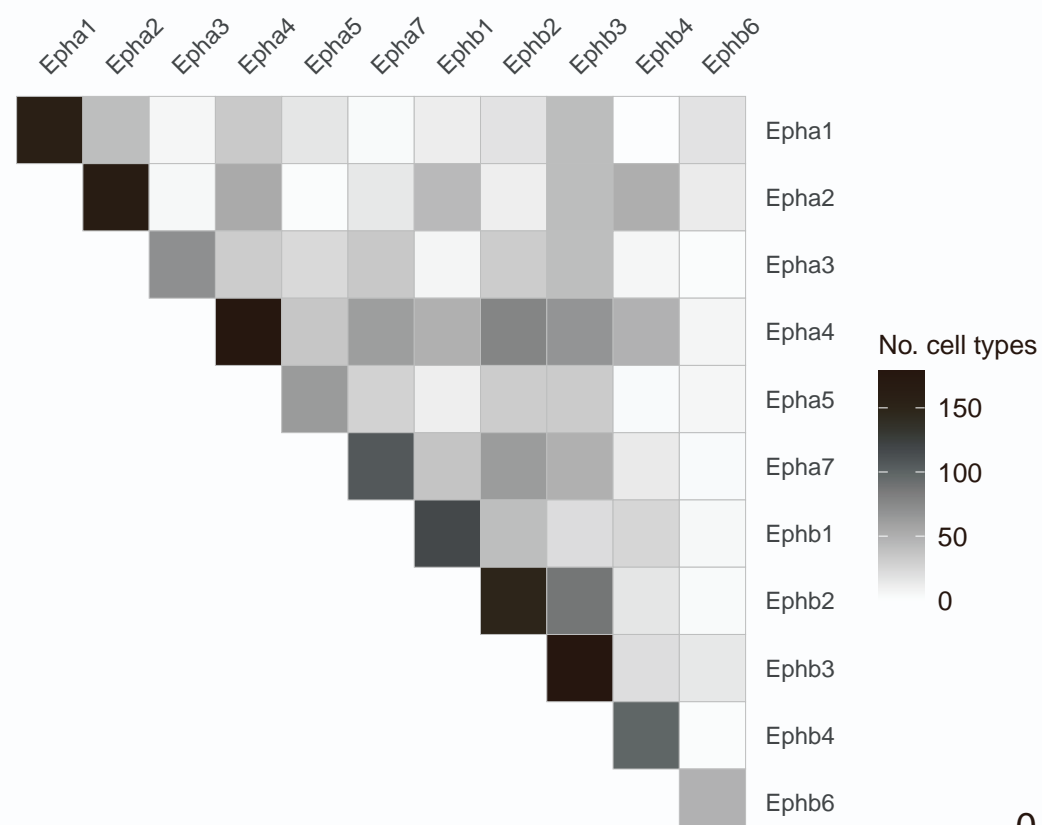

## Silhouette and Z-score

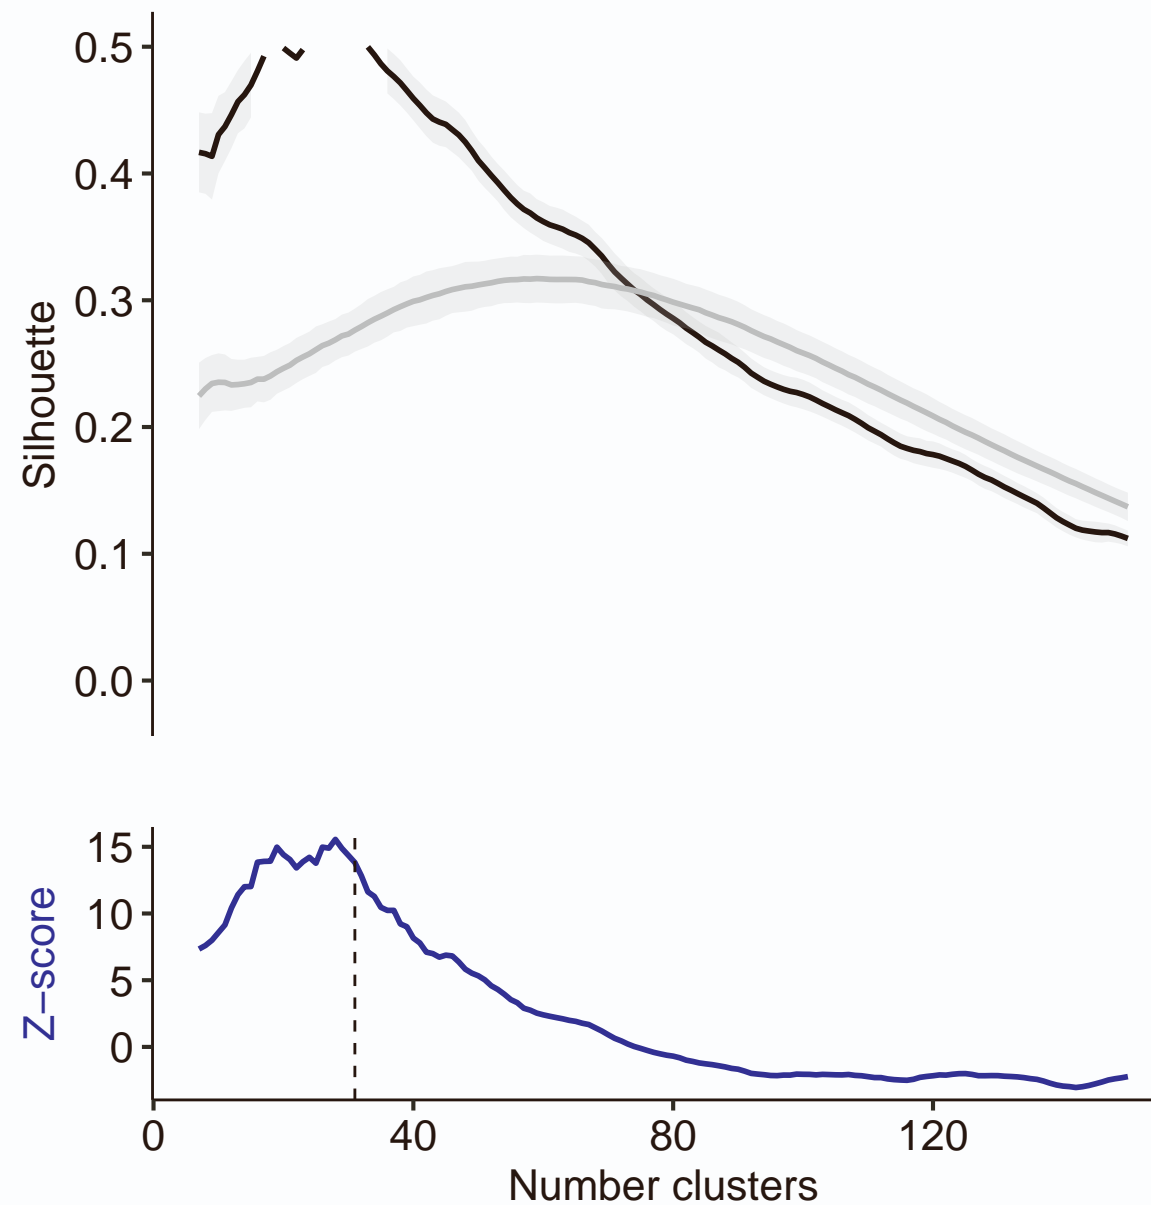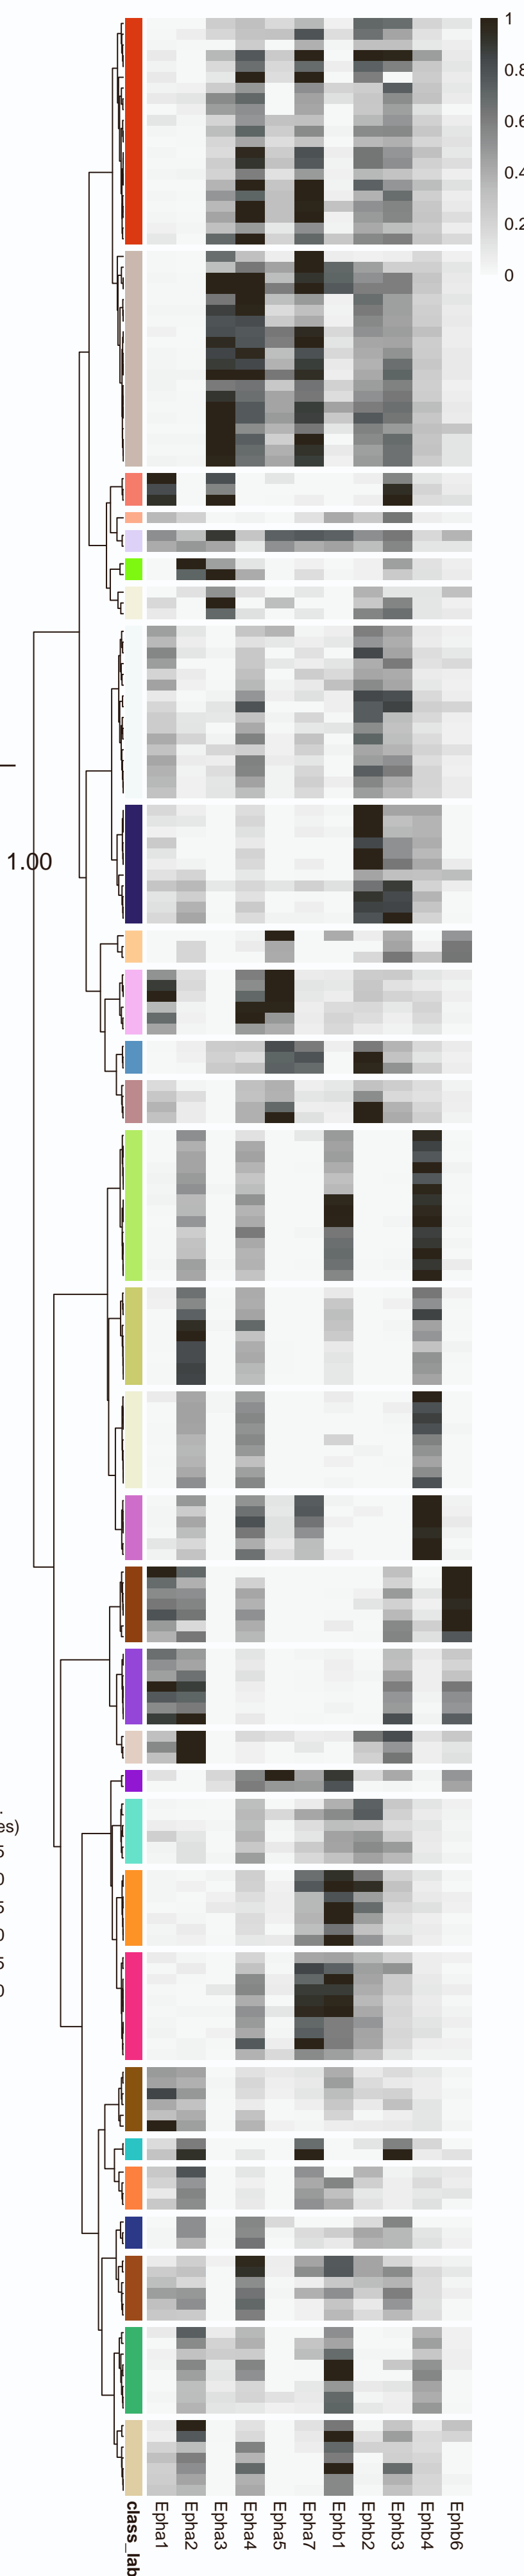

## Global UMAP: Pathway ON

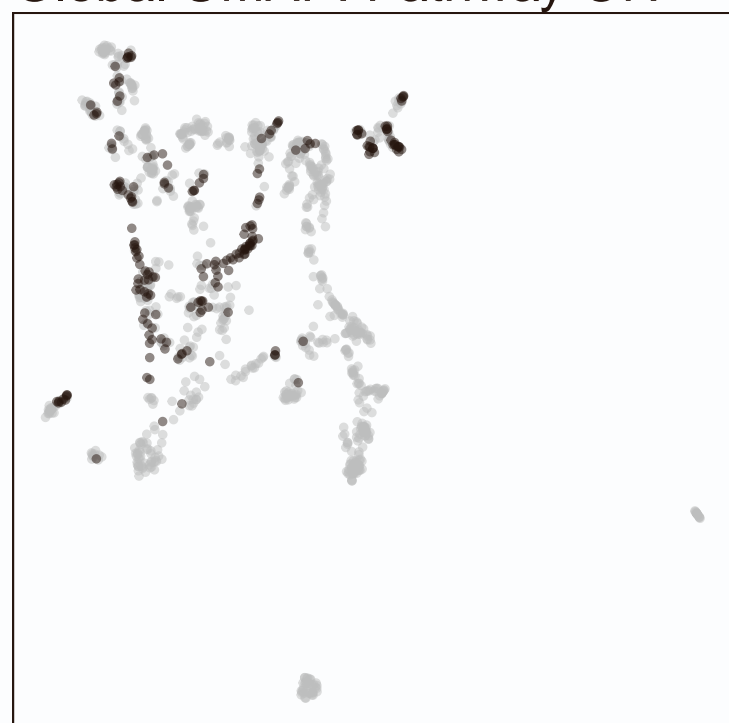

## ECDF of Profile Dispersions

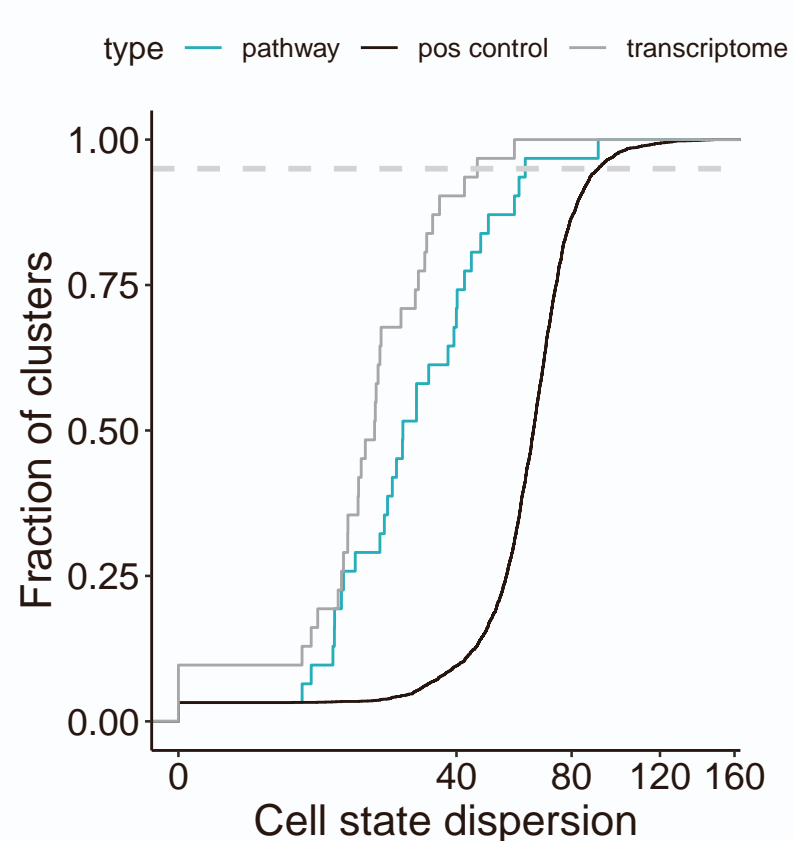

## Profile Dispersion Plot

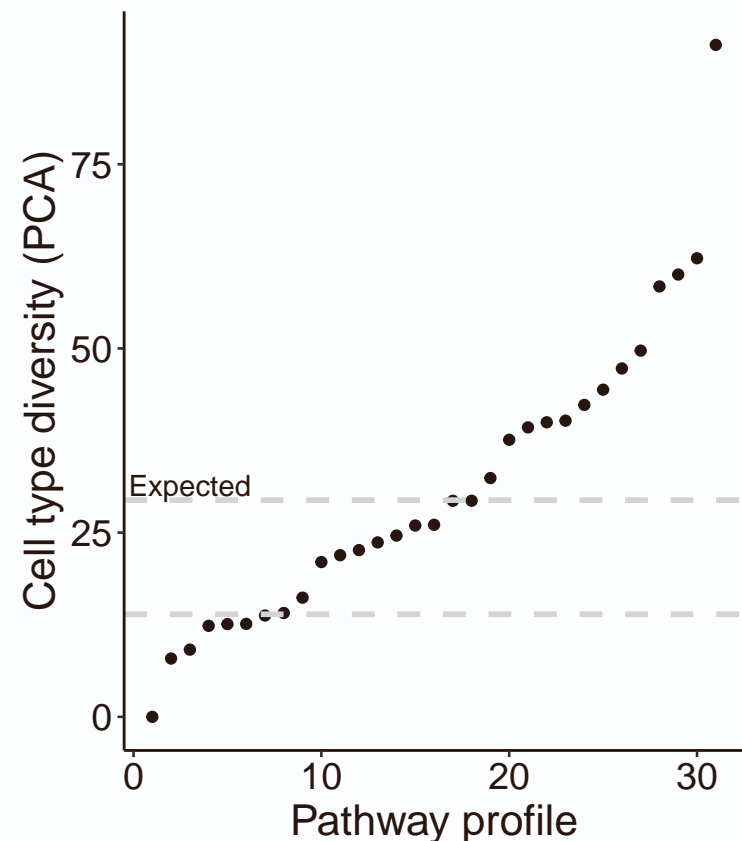

## Motifs, Dispersion $\geq 90^{\text{th}}$ percentile

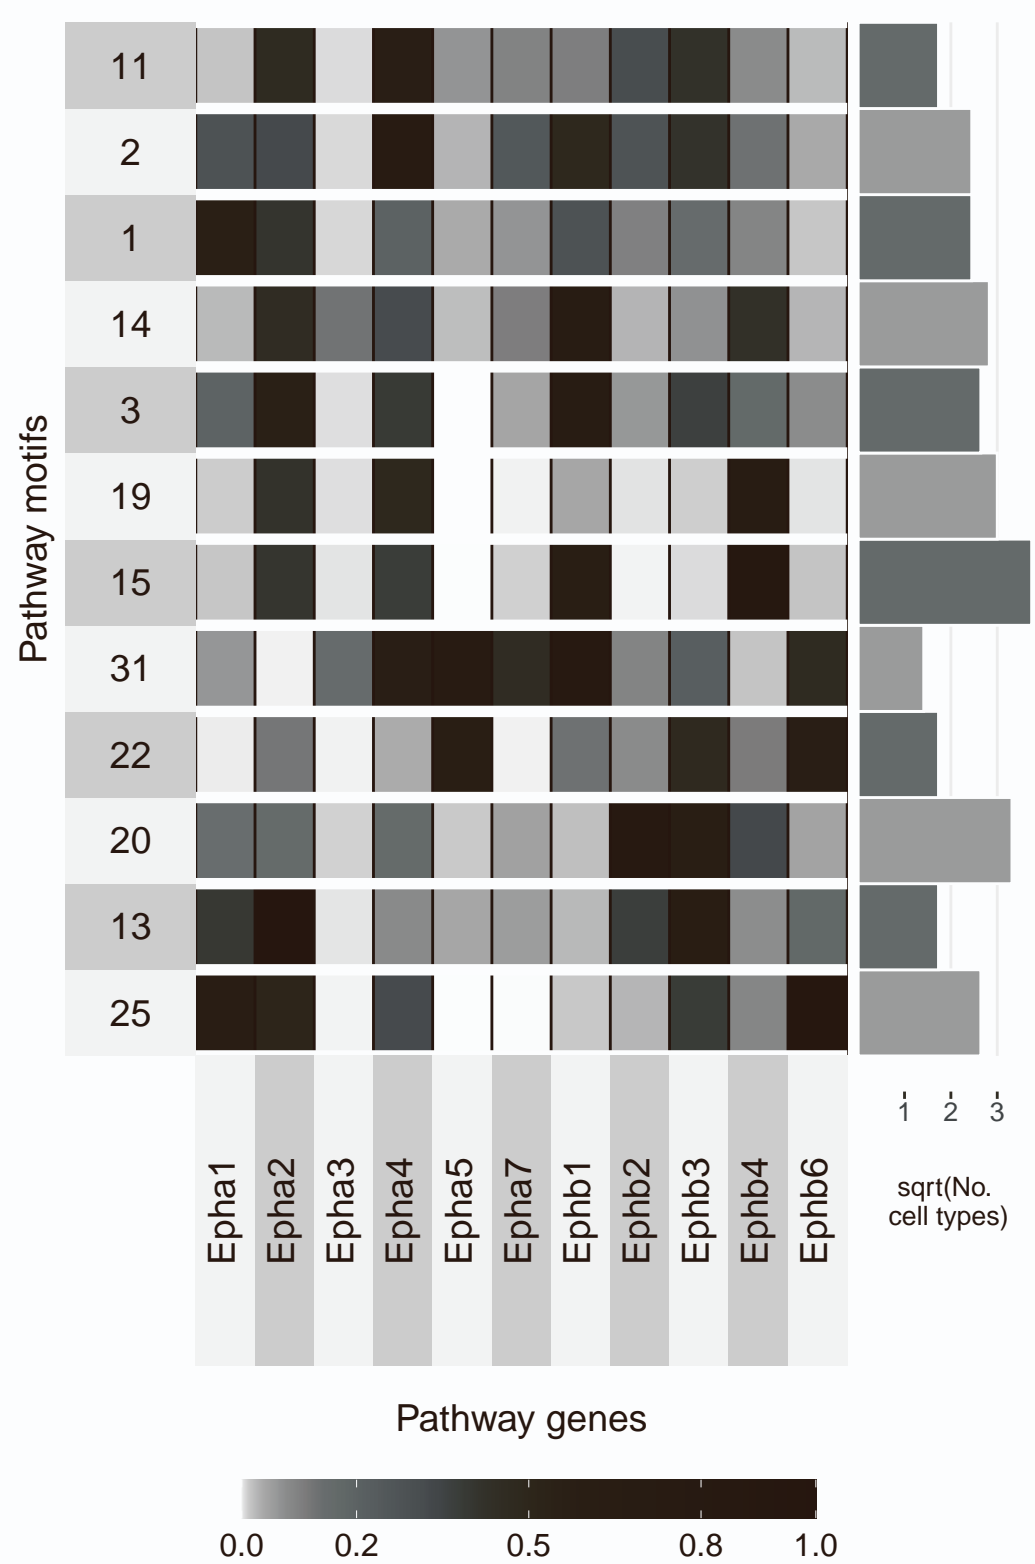

## Motif Tissue Composition

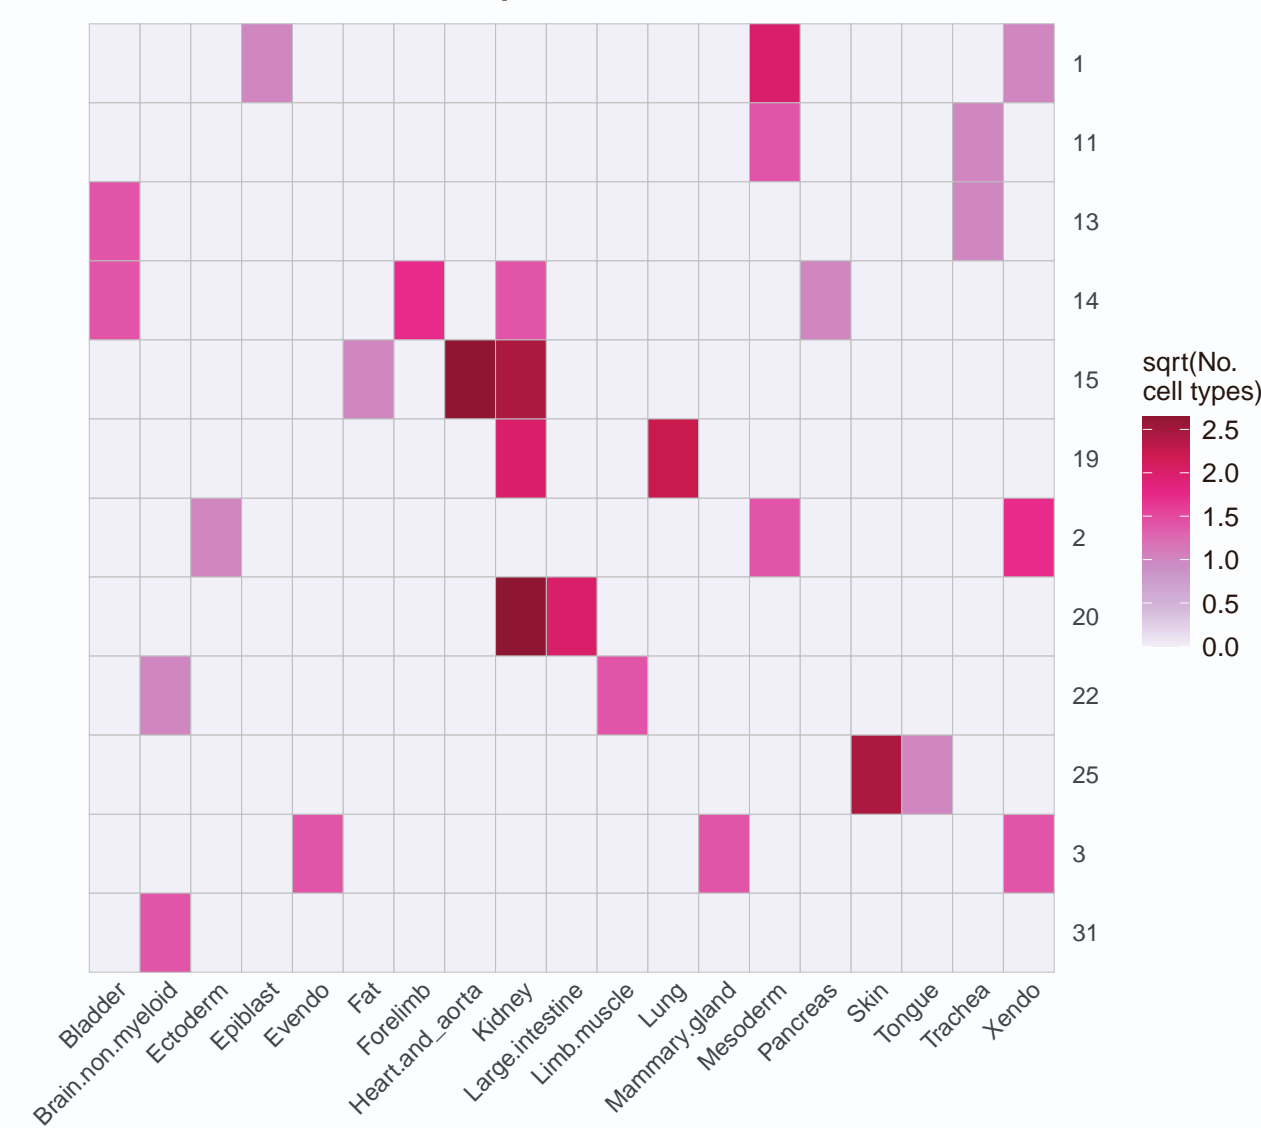



# Eph A–B receptors (k\_opt = 31)

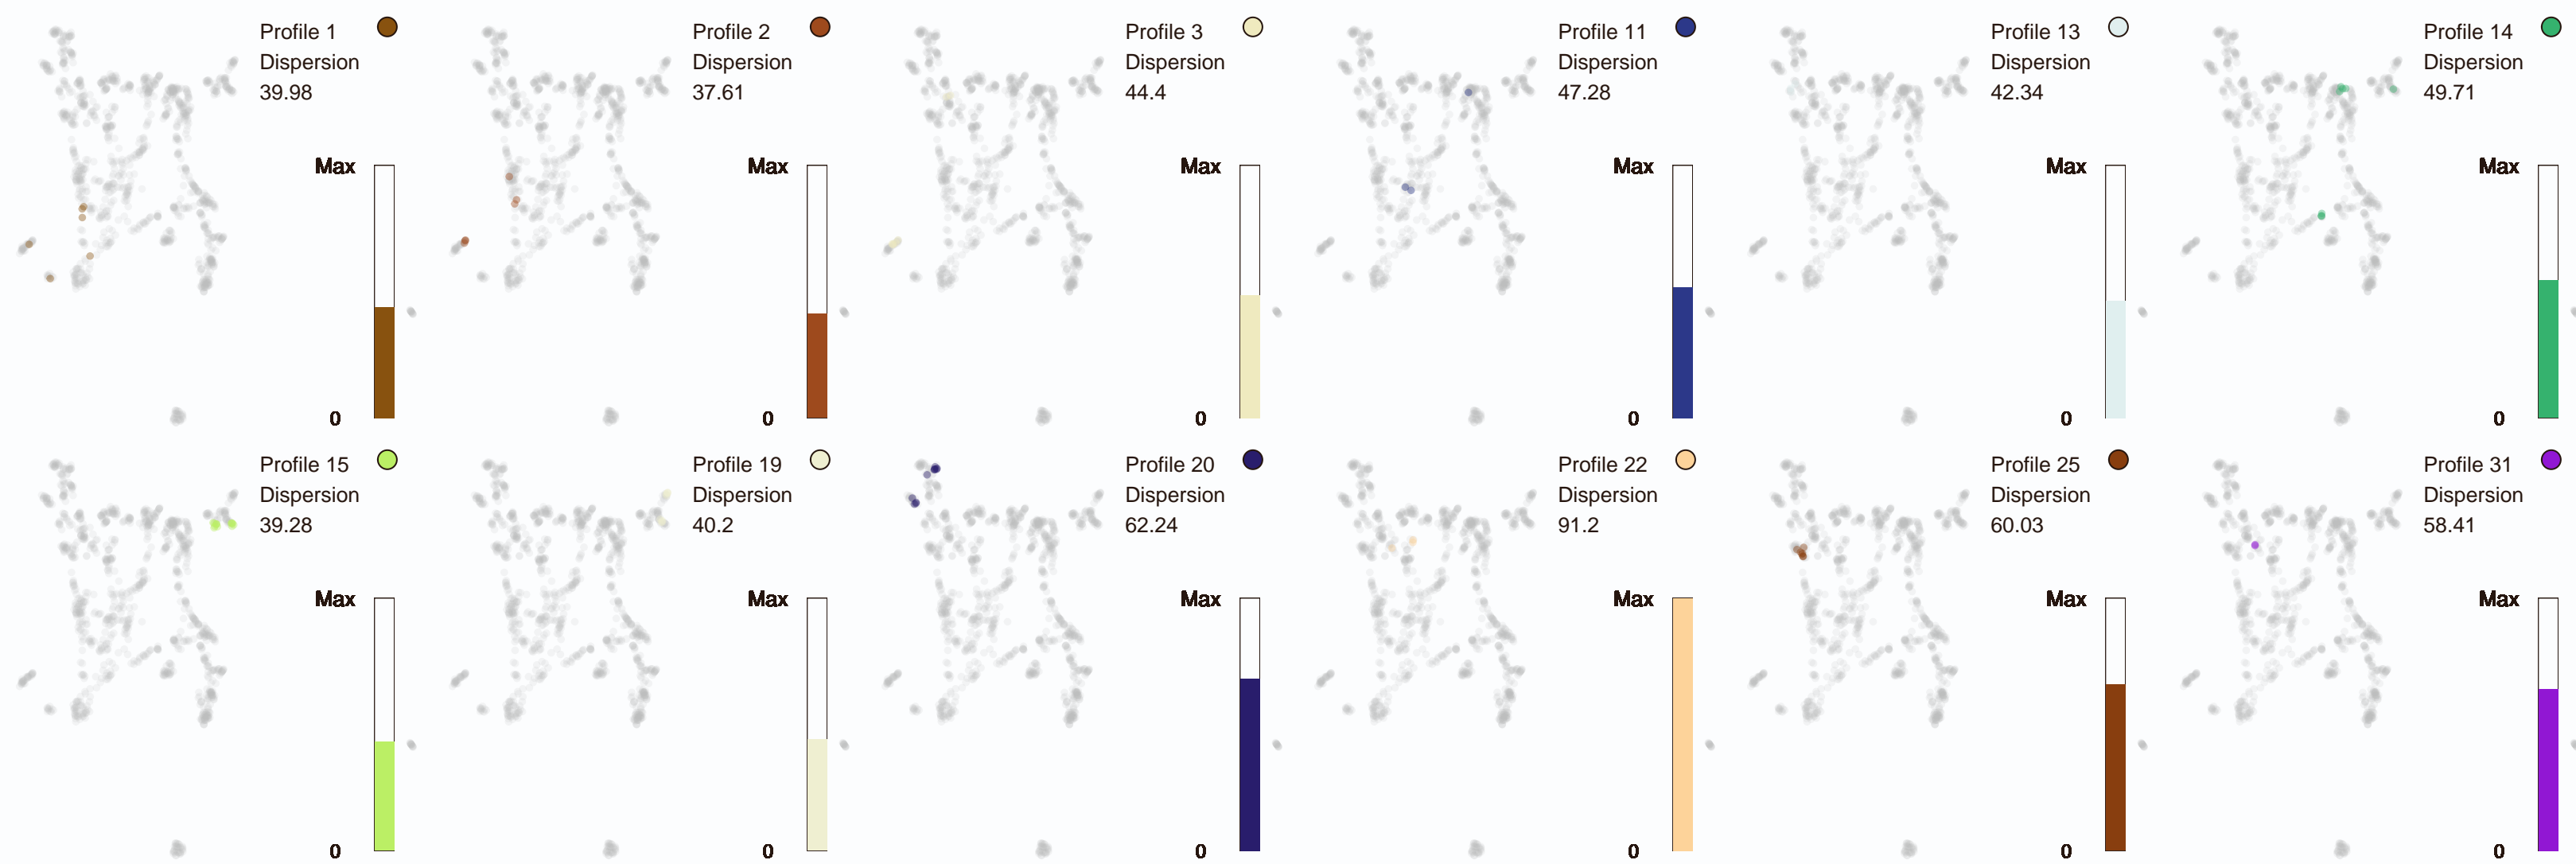

# Eph receptors and ligands (k\_opt = 52)

Epha1  
 Epha2  
 Epha3  
 Epha4  
 Epha5  
 Epha7  
 Ephb1  
 Ephb2  
 Ephb3  
 Ephb4  
 Ephb6  
 Efna1  
 Efna2  
 Efna3  
 Efna4  
 Efna5  
 Efnb1  
 Efnb2  
 Efnb3

## Gene Co-Expression Above Threshold

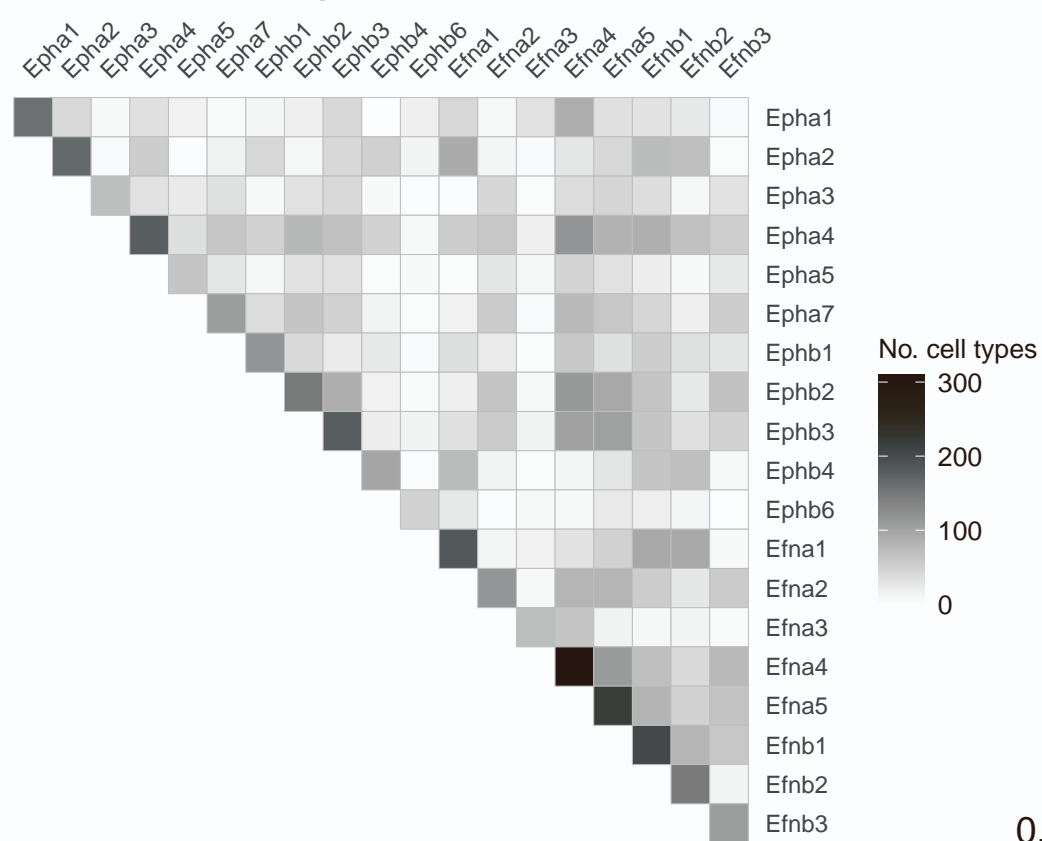

## Silhouette and Z-score

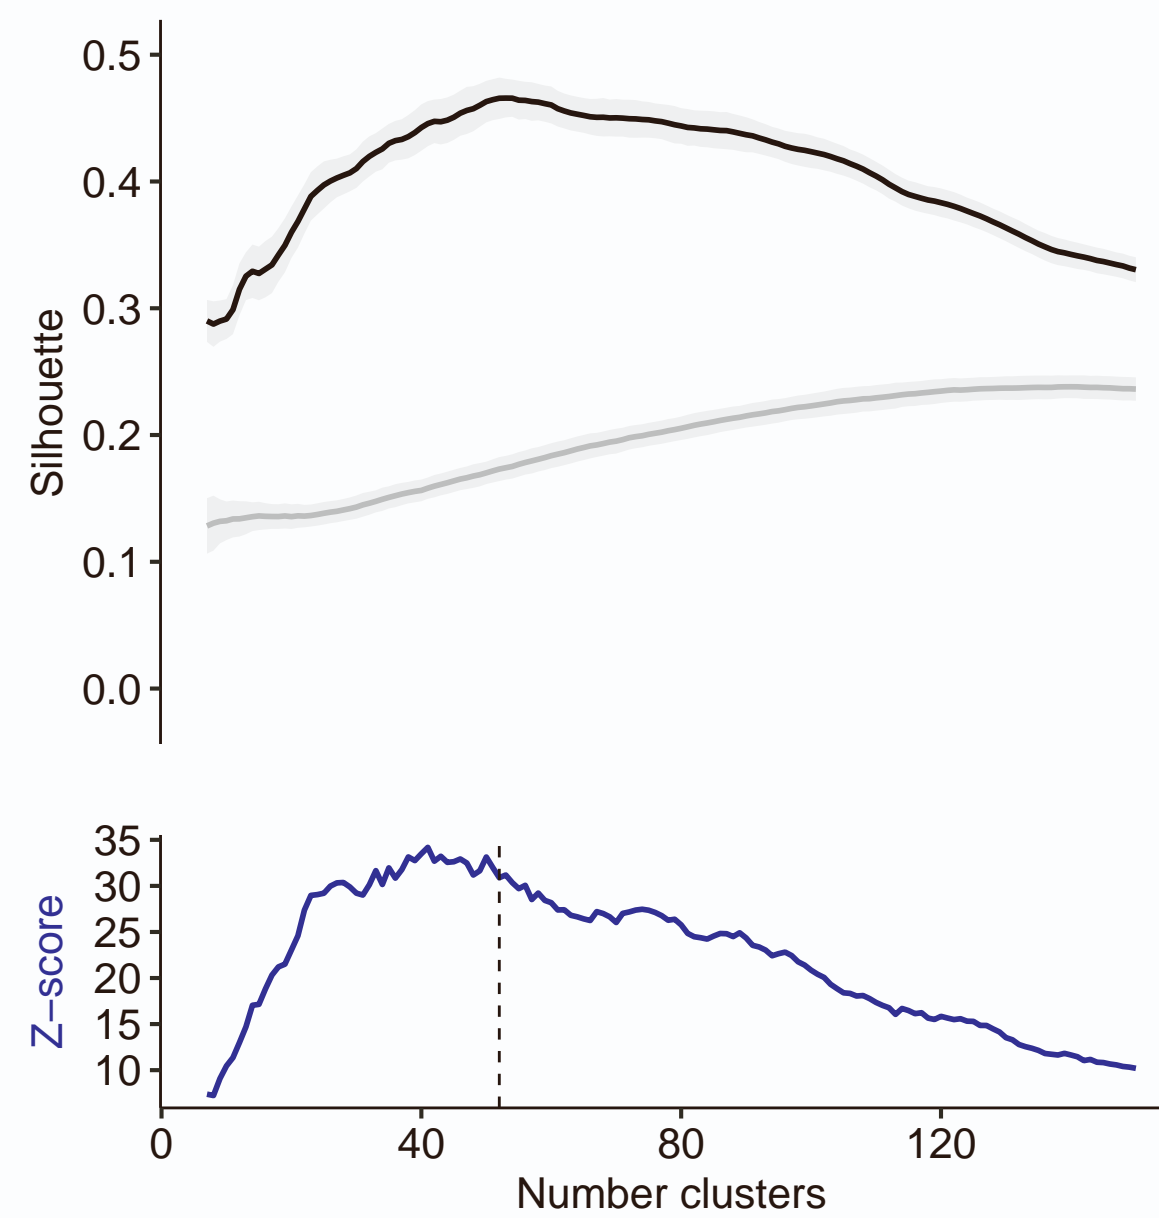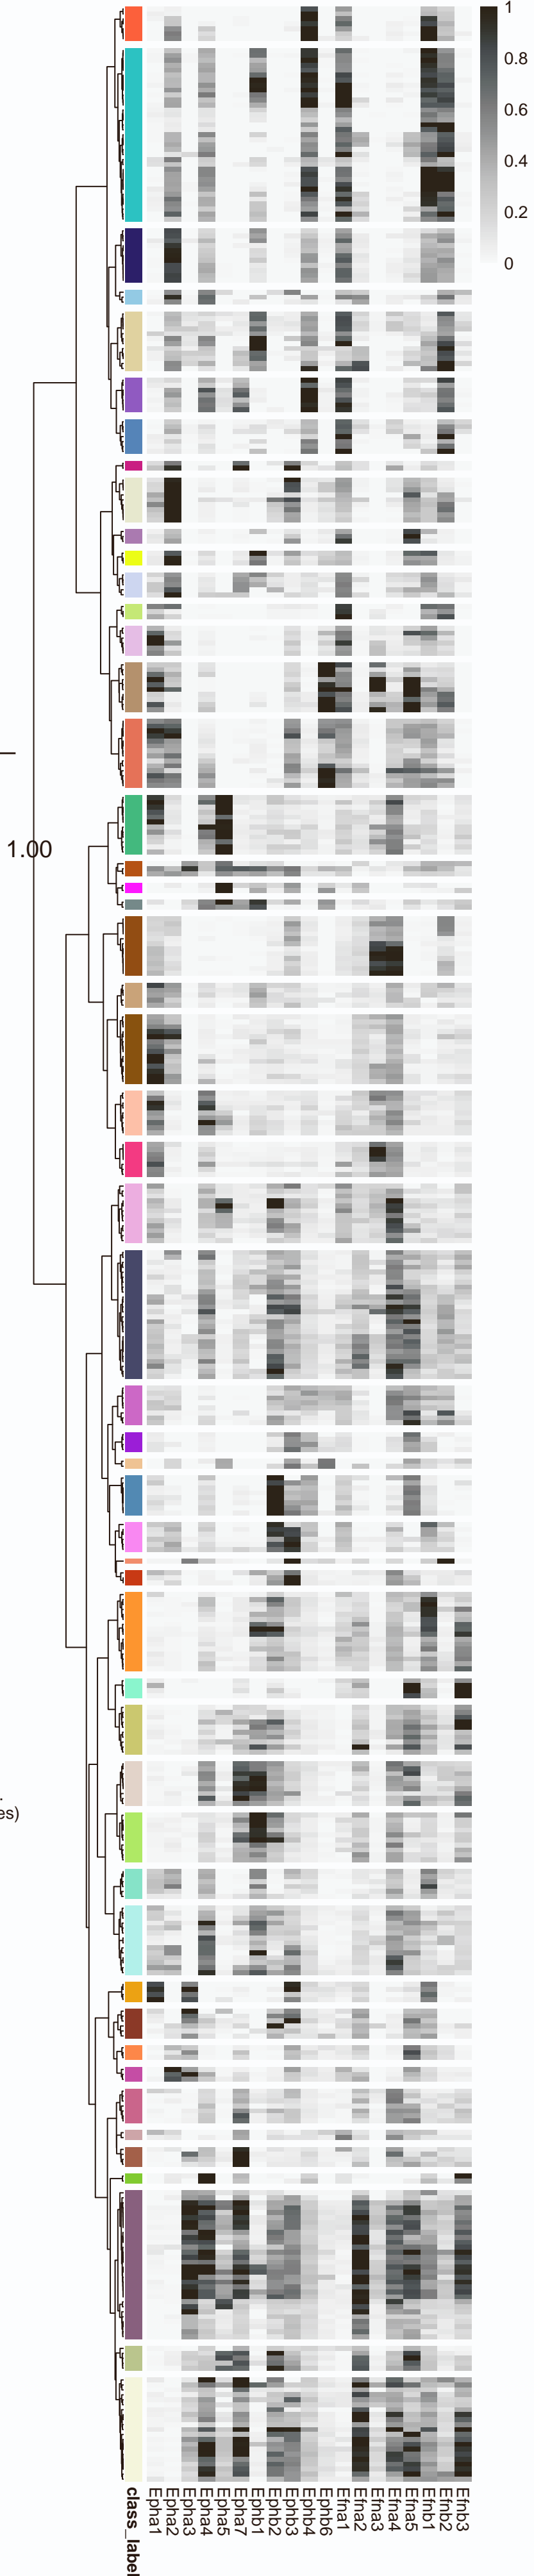

## Global UMAP: Pathway ON

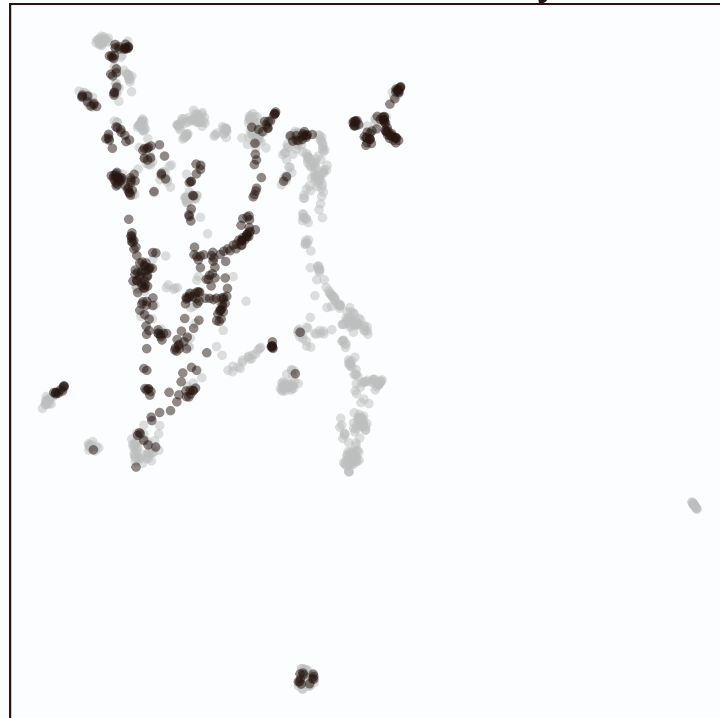

## ECDF of Profile Dispersions

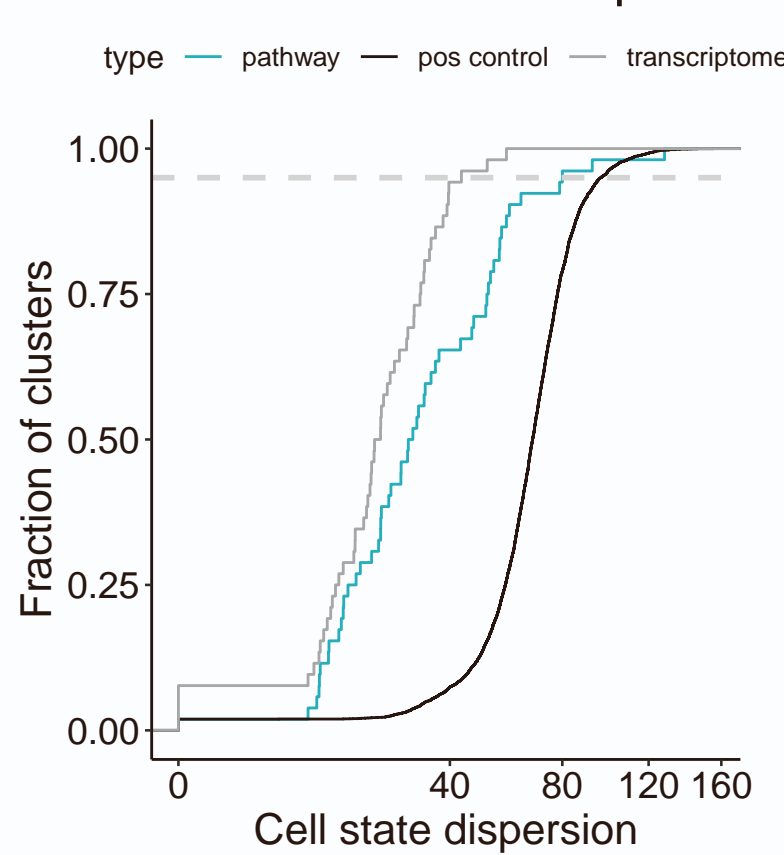

## Profile Dispersion Plot

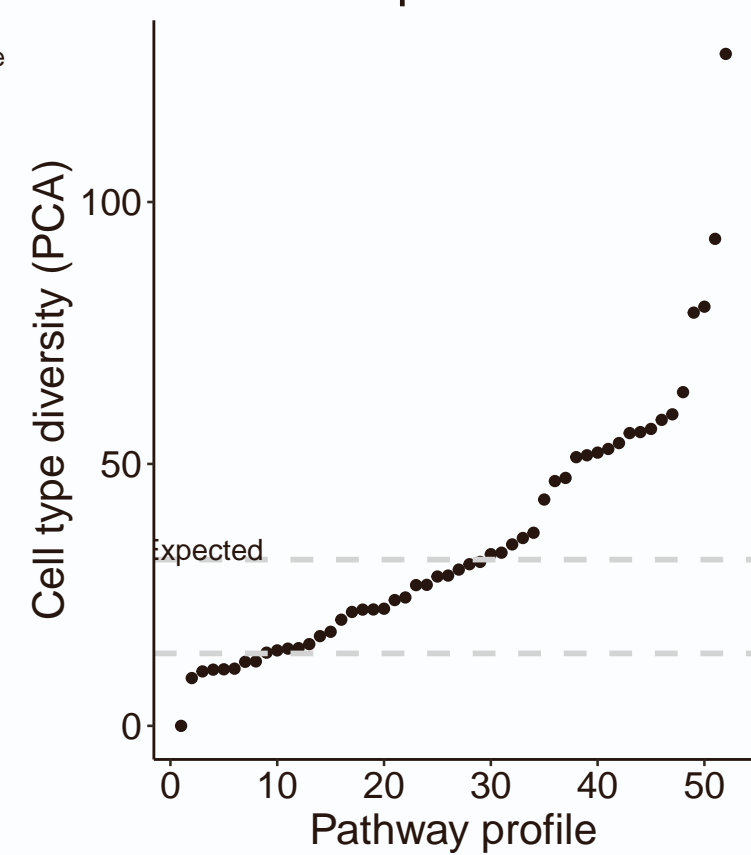

## Motifs, Dispersion $\geq 90^{\text{th}}$ percentile

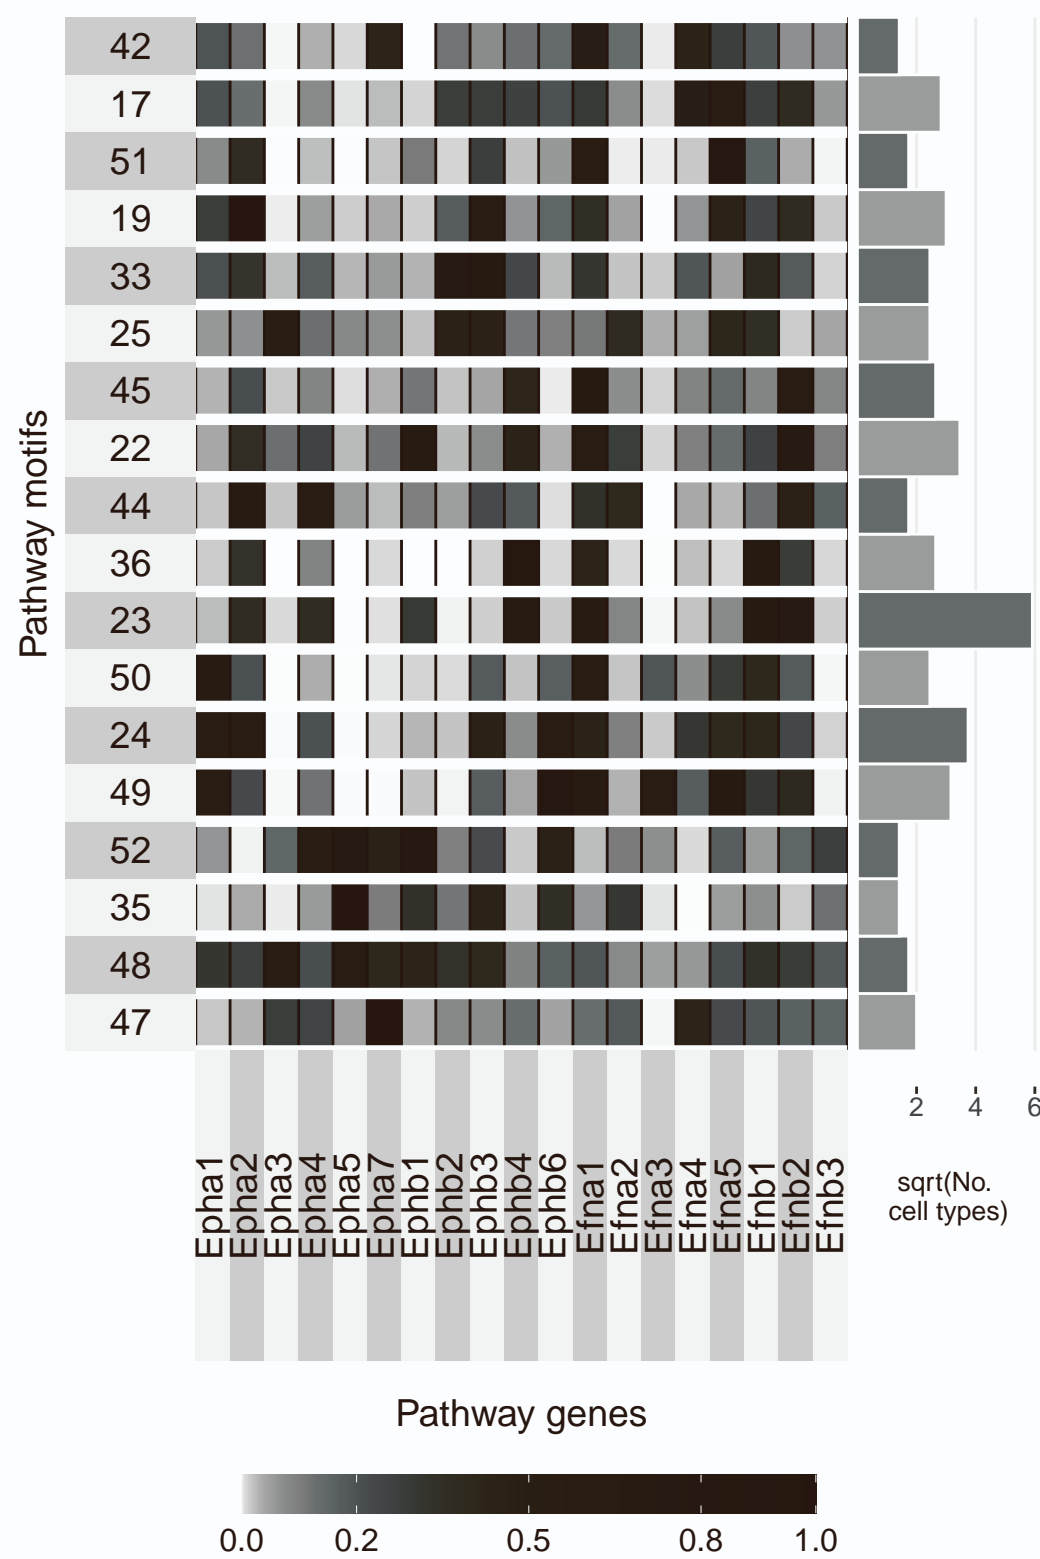

## Motif Tissue Composition

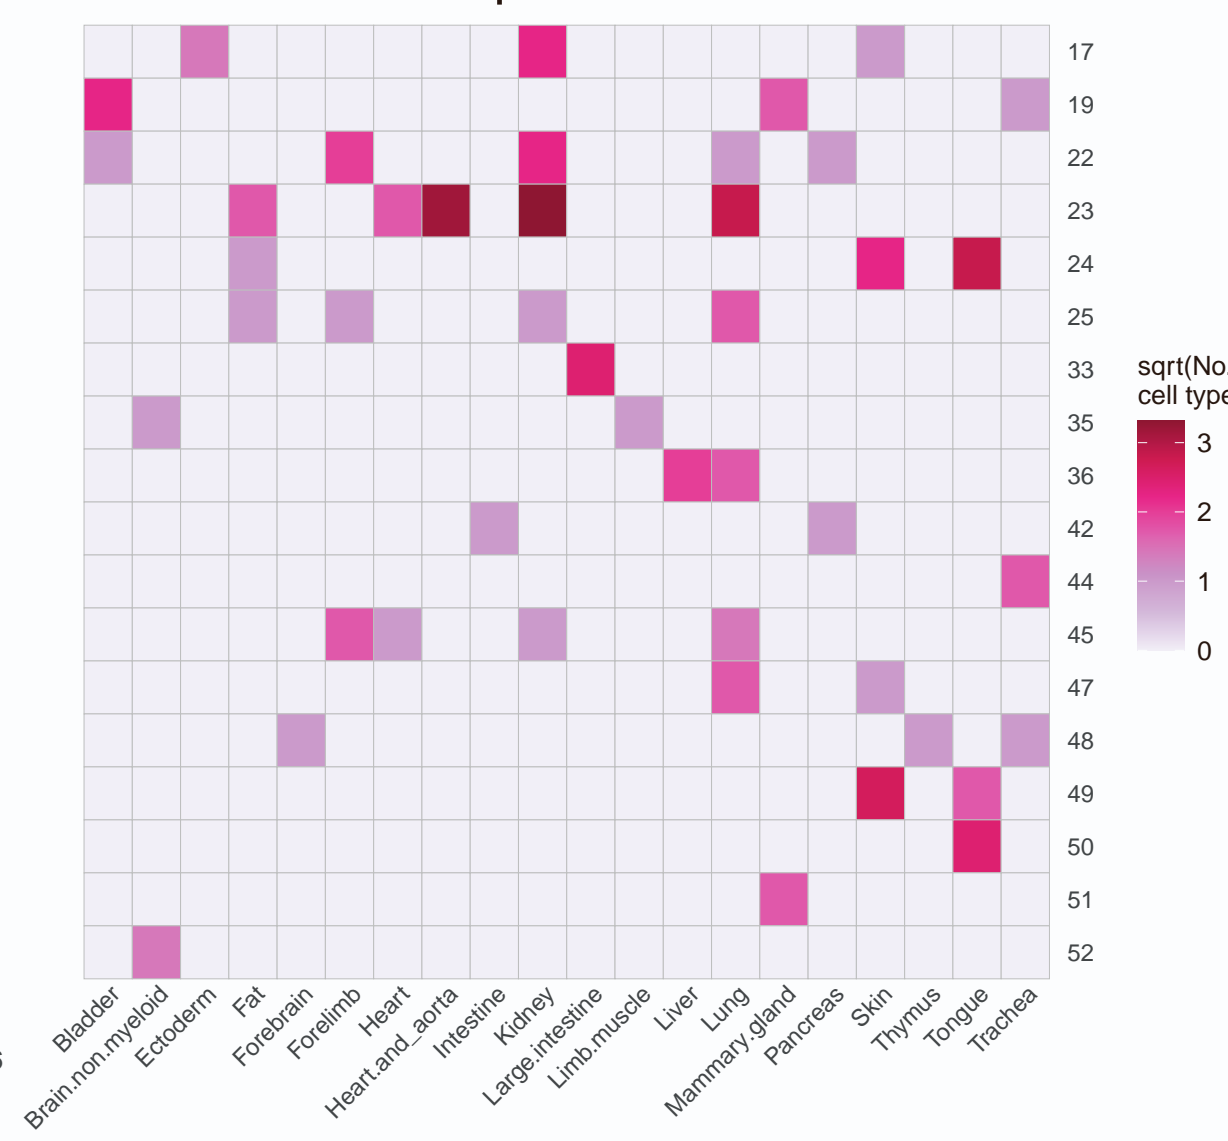

# Eph receptors and ligands (k\_opt = 52)

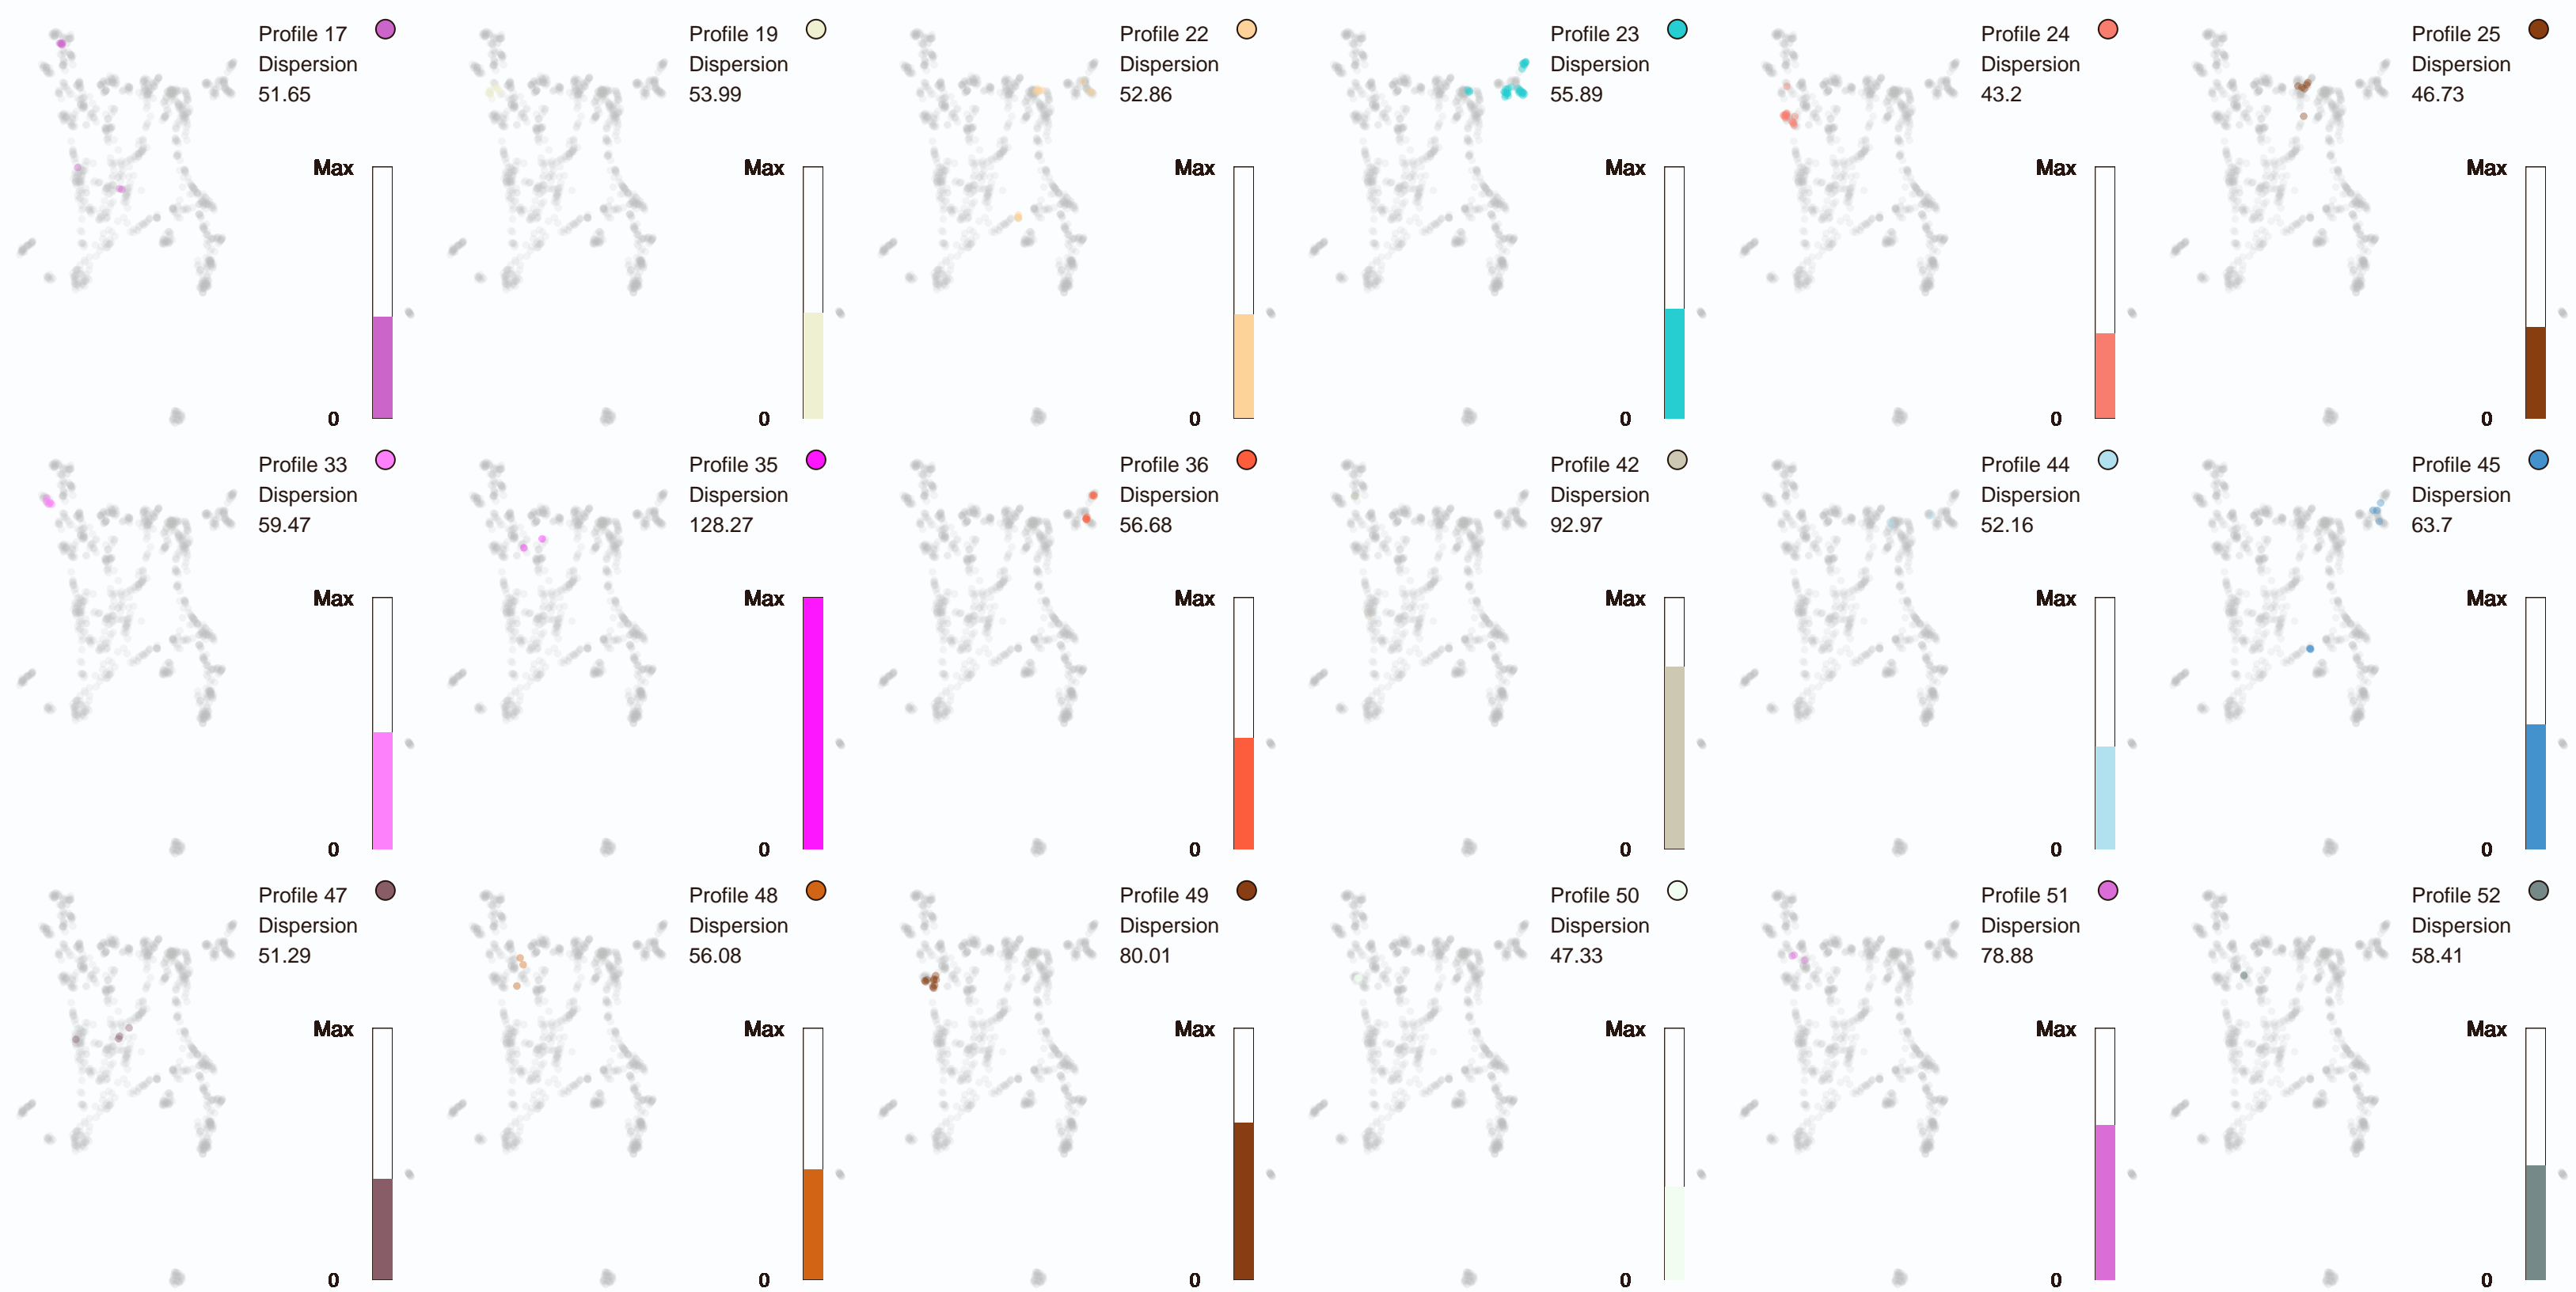

# Eph\_I (k\_opt = 16)

Pathway genes  
 Efna1 Efna2 Efna3 Efna4 Efna5 Efnb1 Efnb2 Efnb3

## Gene Co-Expression Above Threshold

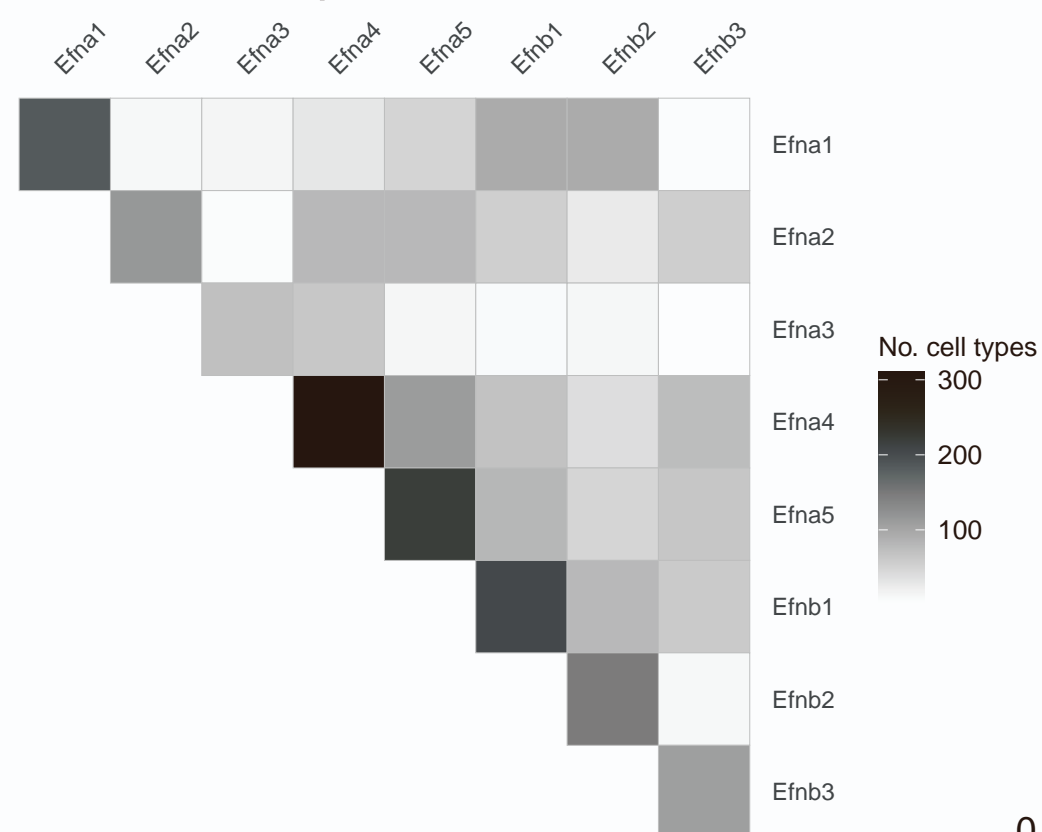

## Silhouette and Z-score

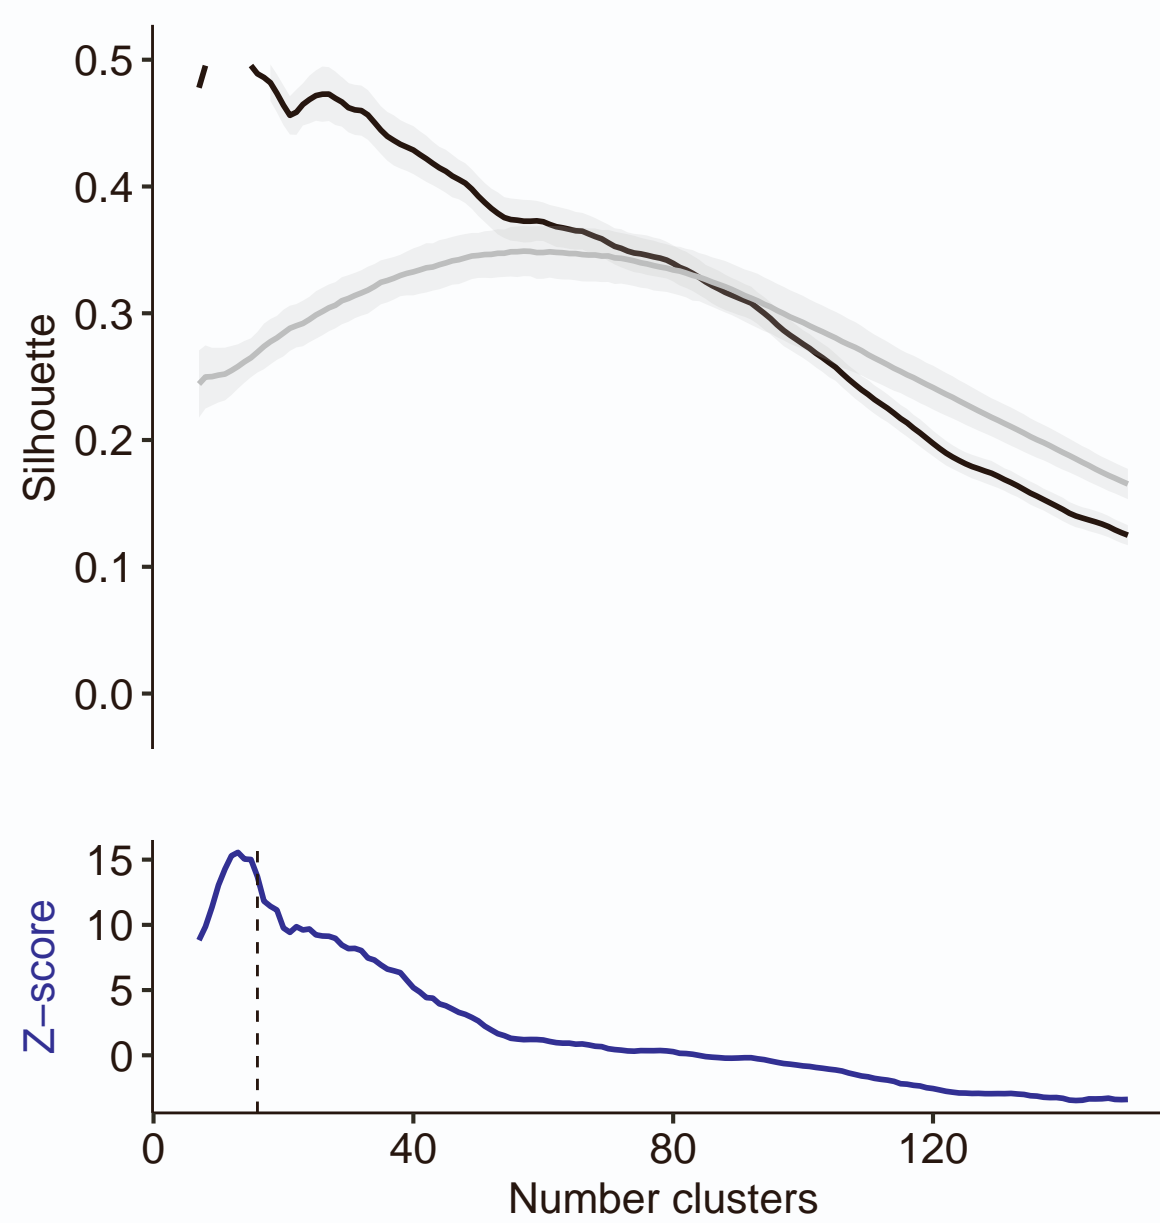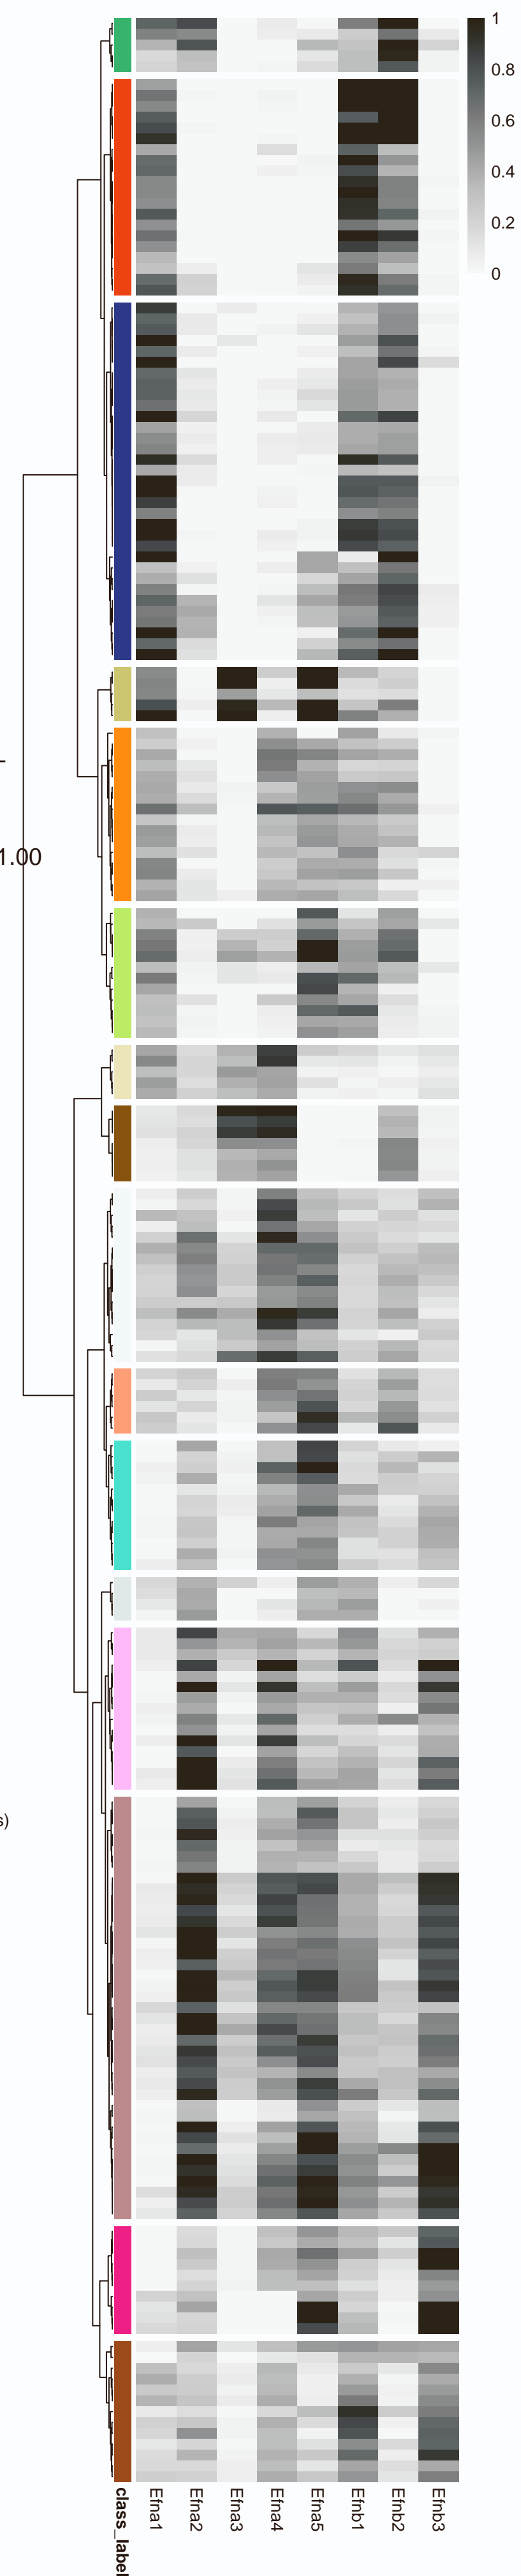

## Global UMAP: Pathway ON

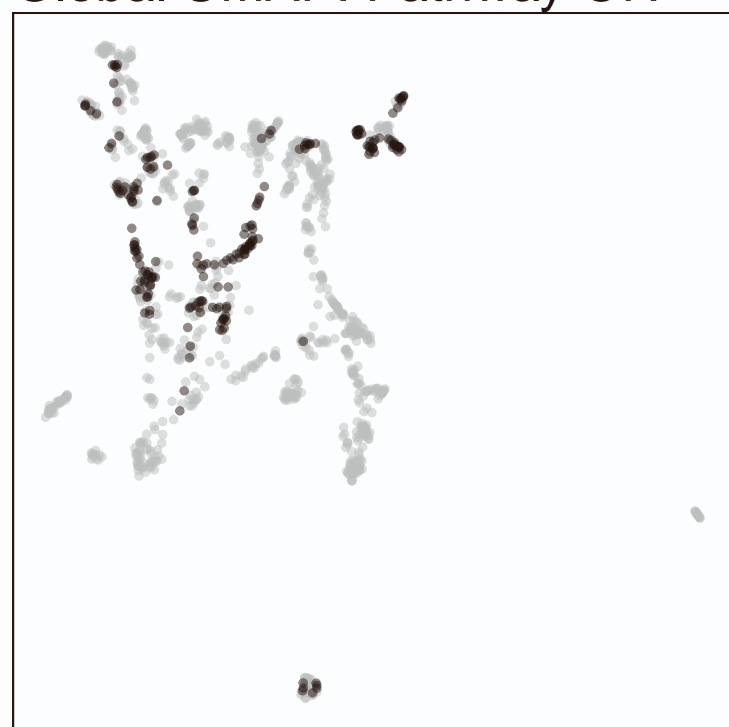

## ECDF of Profile Dispersions

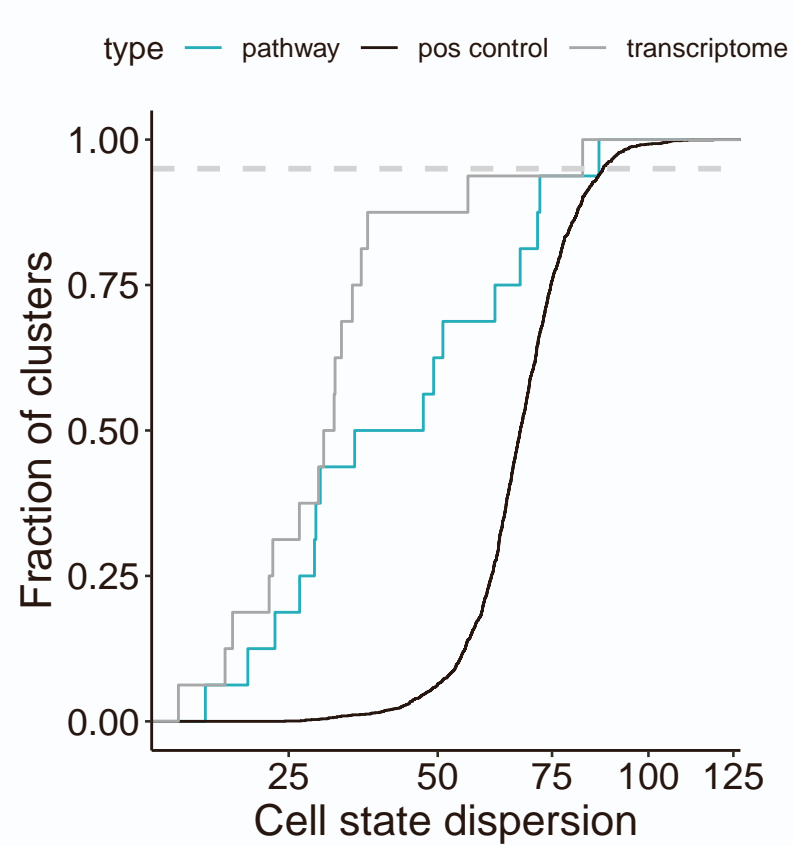

## Profile Dispersion Plot

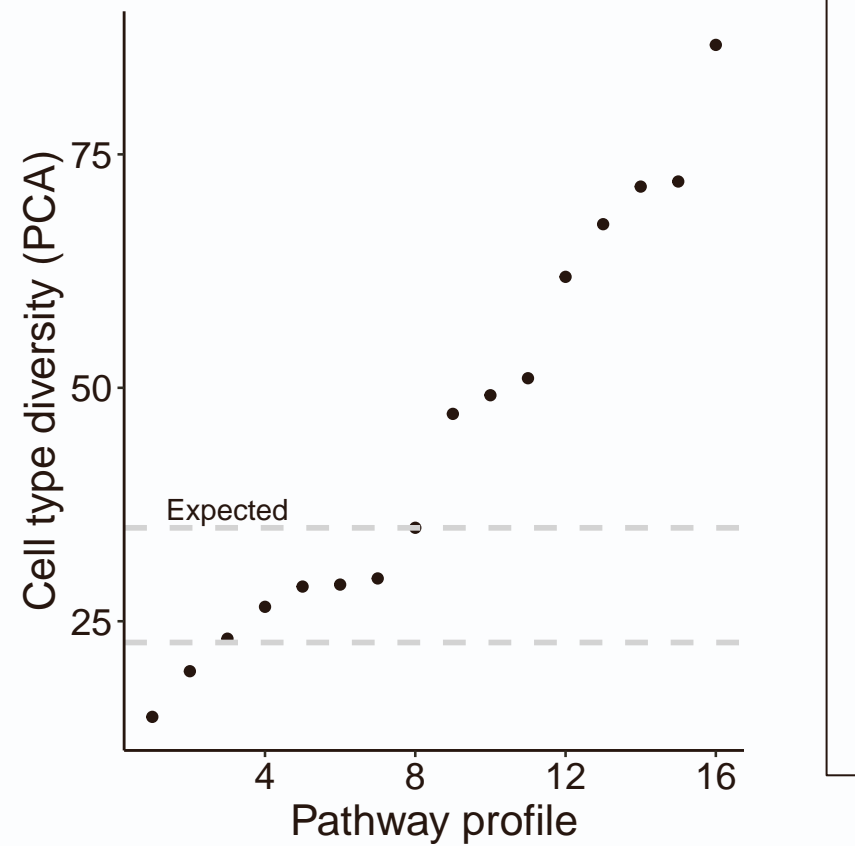

## Motifs, Dispersion $\geq 90^{\text{th}}$ percentile

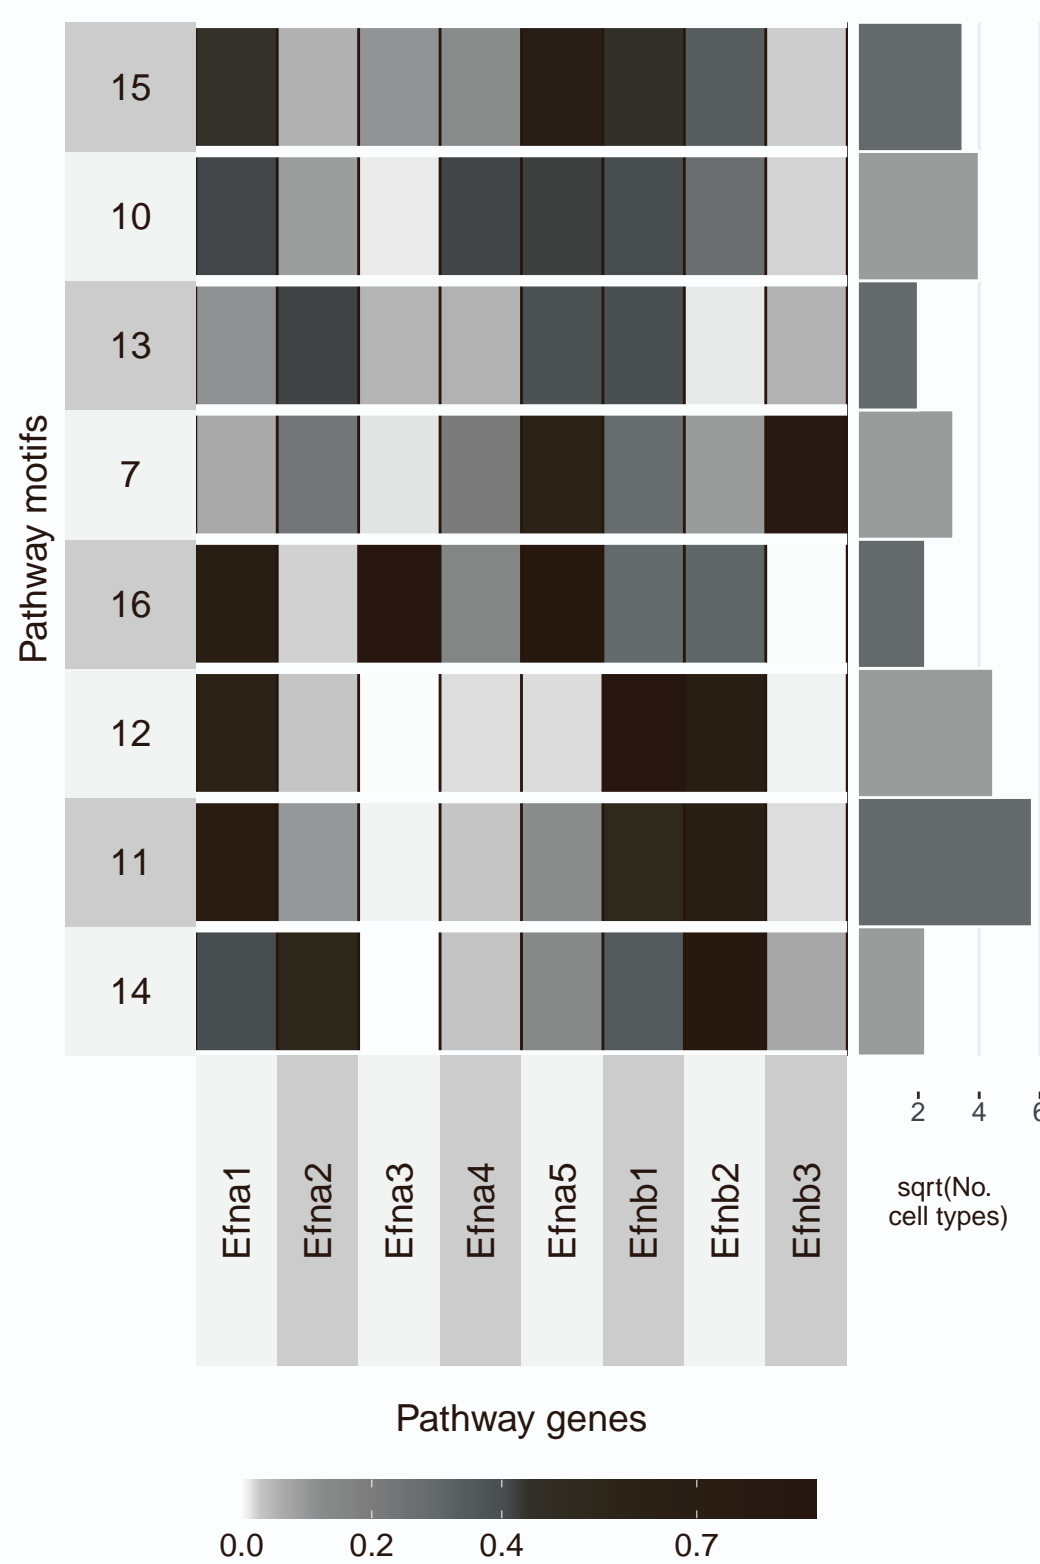

## Motif Tissue Composition

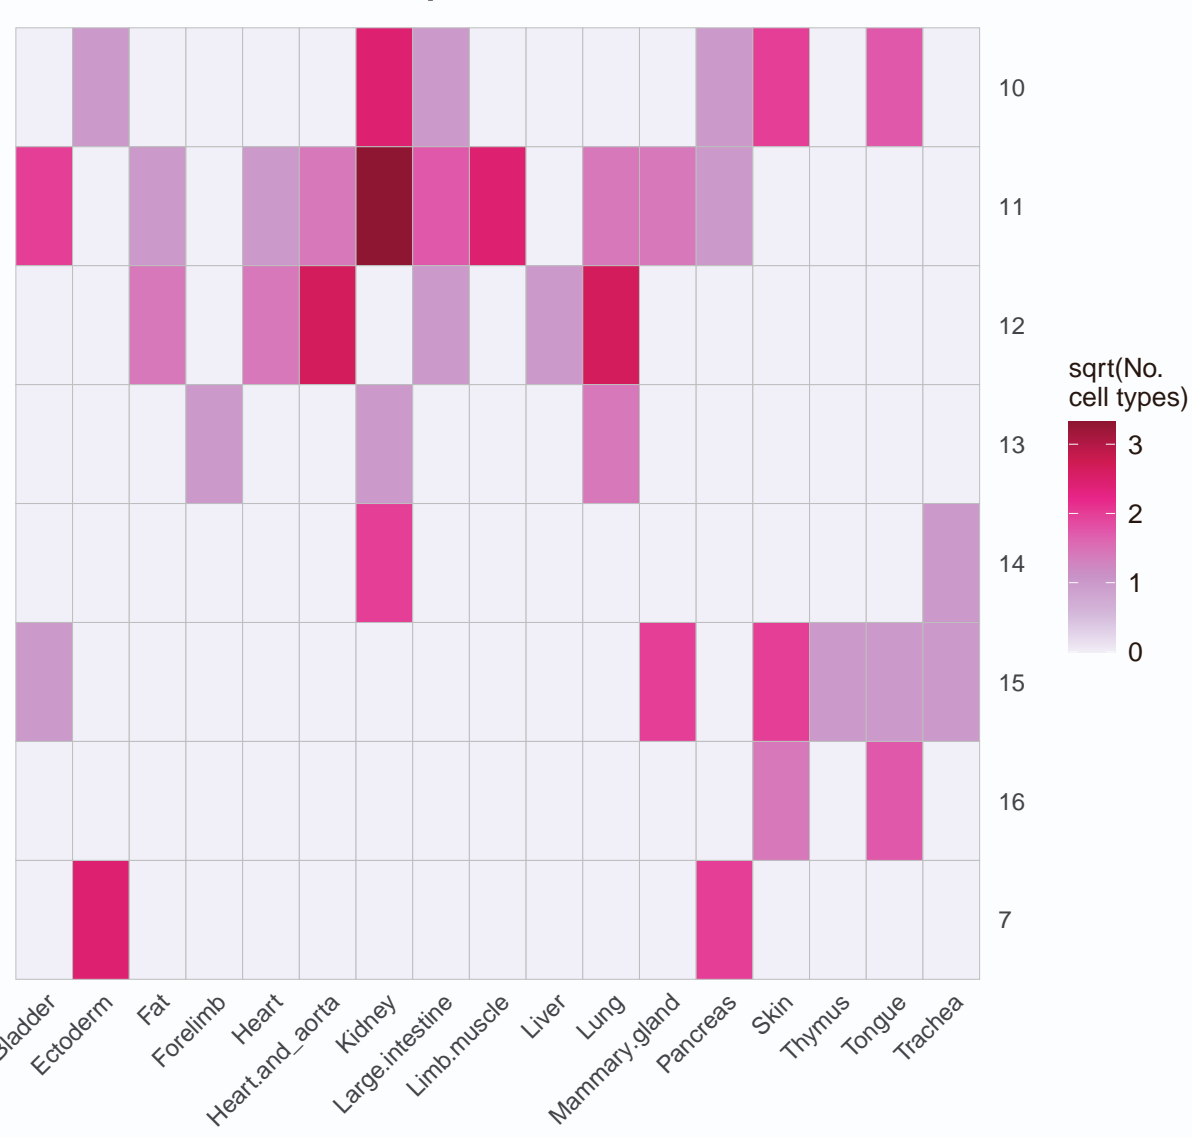

class\_label  
 Efna1 Efna2 Efna3 Efna4 Efna5 Efnb1 Efnb2 Efnb3

# Eph\_I (k\_opt = 16)

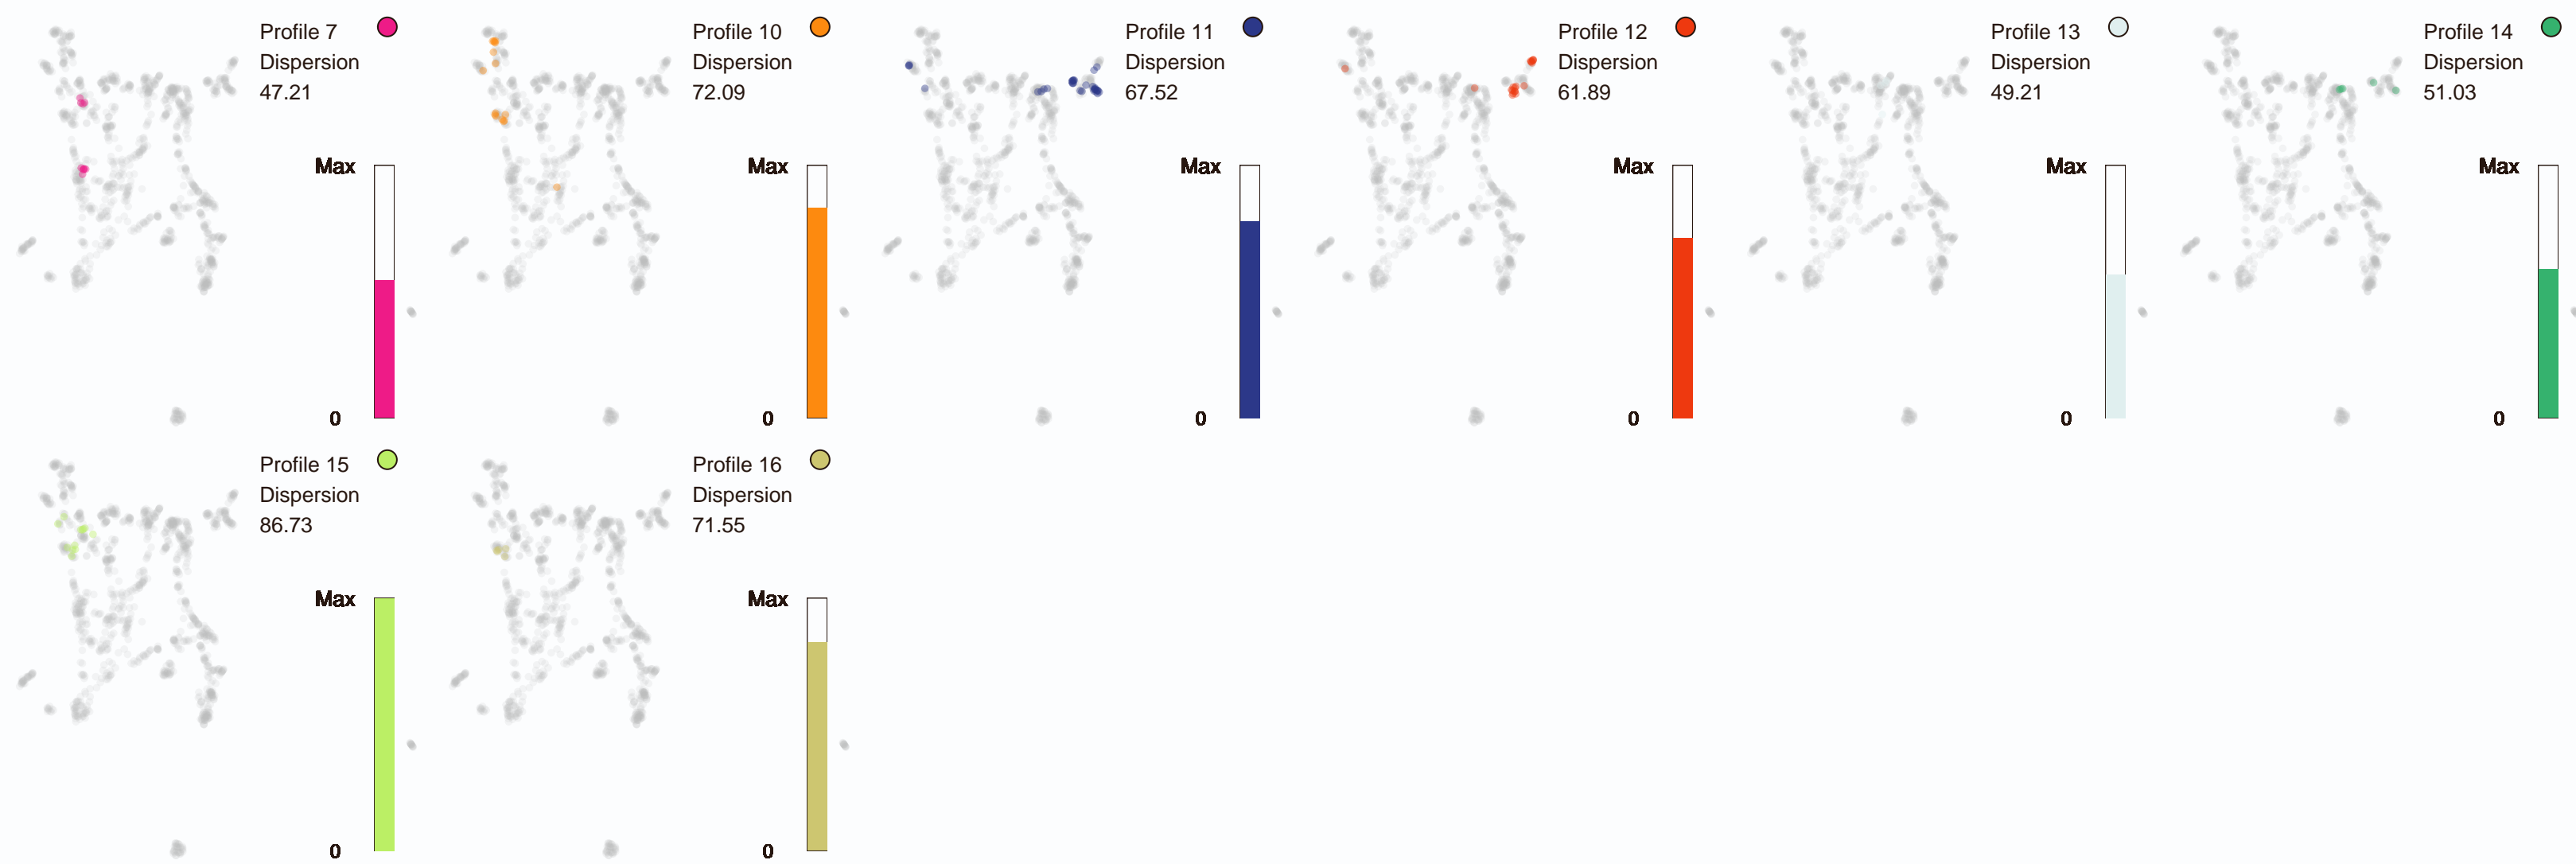

# FGF cell signaling proteins (k\_opt = 80)

Fgf1  
 Fgf10  
 Fgf11  
 Fgf12  
 Fgf13  
 Fgf14  
 Fgf16

**Pathway genes**  
 Fgf18  
 Fgf2  
 Fgf7  
 Fgf9  
 Fgfbp1  
 Fgfbp3

Fgfr1  
 Fgfr1op  
 Fgfr1op2  
 Fgfr2  
 Fgfr3  
 Fgfr4  
 Fgfrl1

## Gene Co-Expression Above Threshold

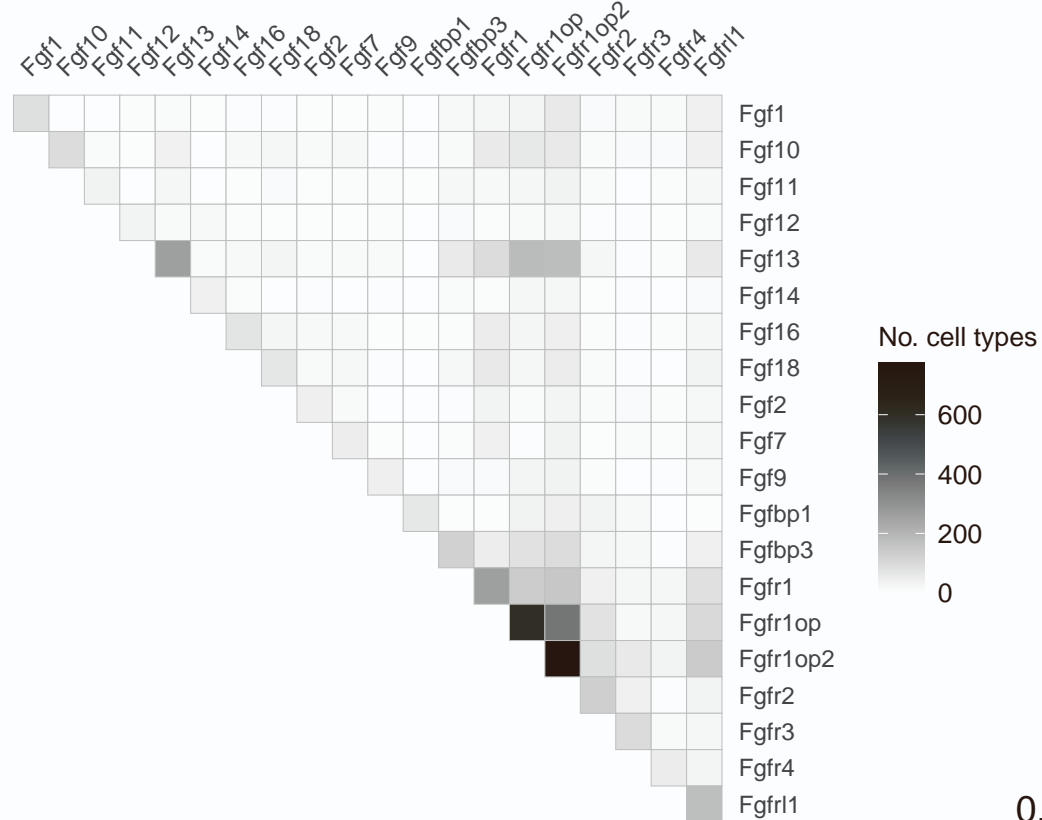

## Silhouette and Z-score

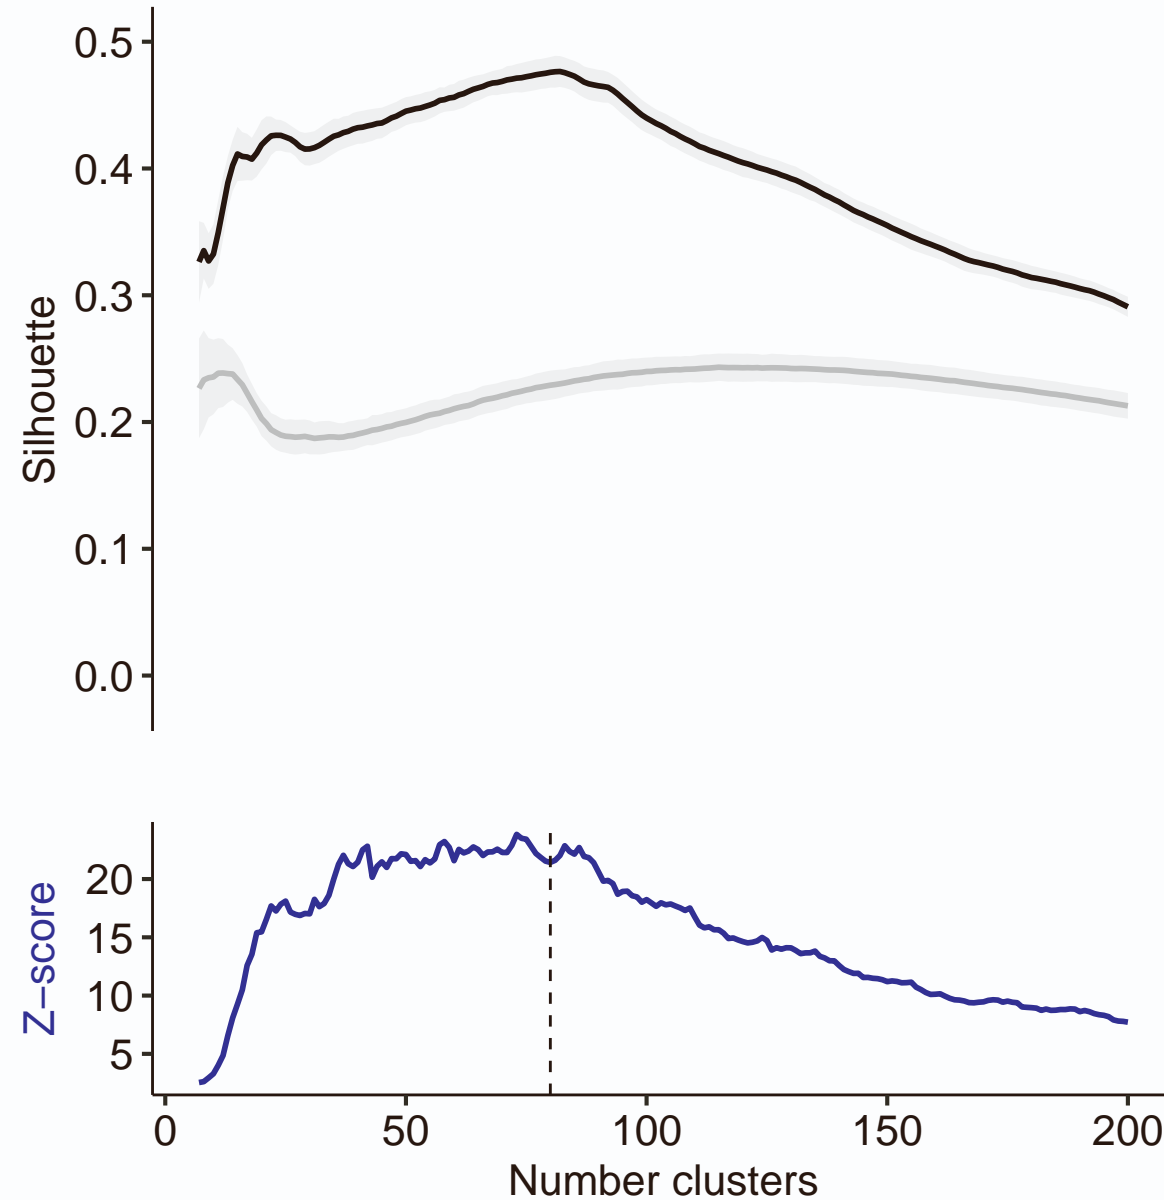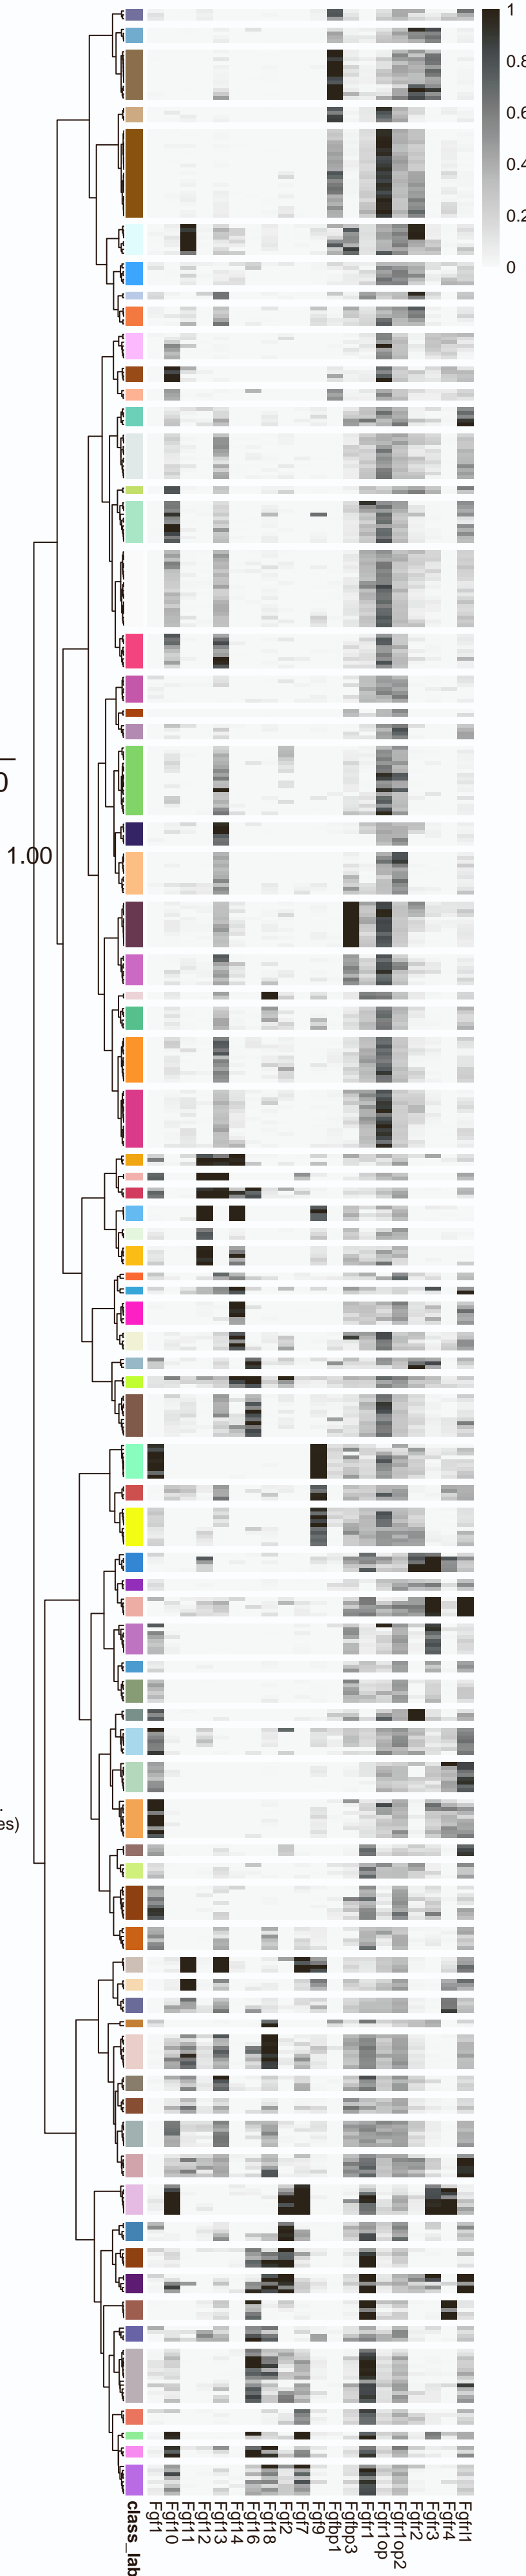

## Global UMAP: Pathway ON

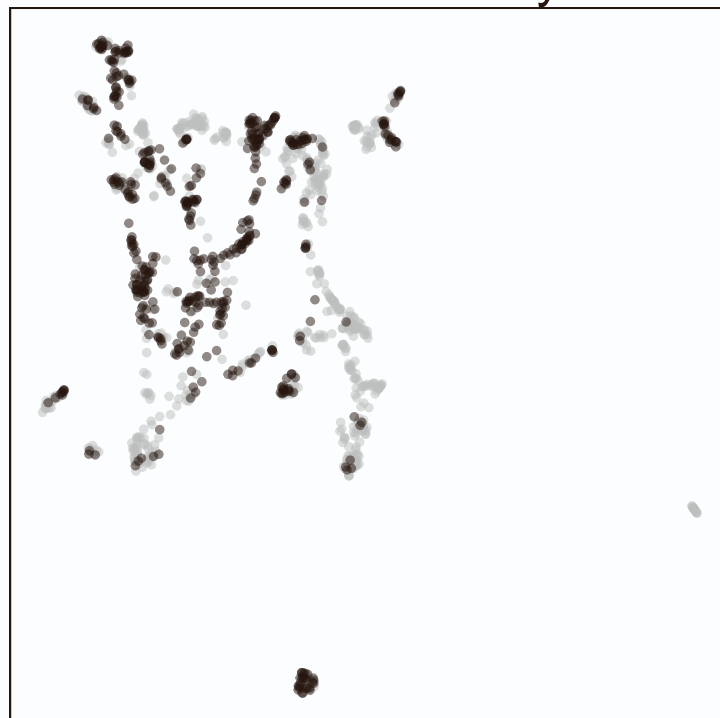

## ECDF of Profile Dispersions

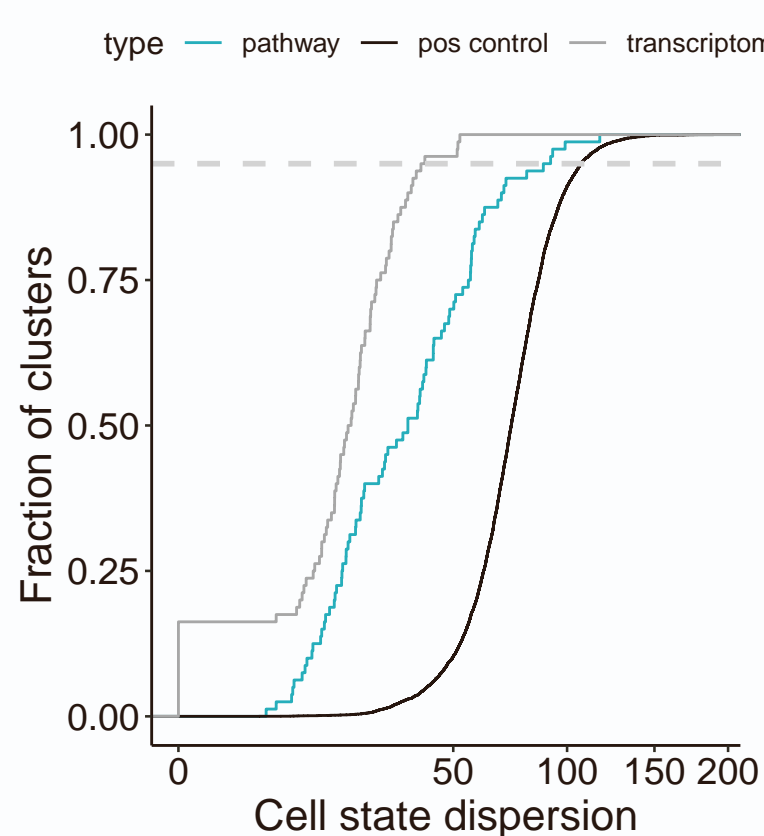

## Profile Dispersion Plot

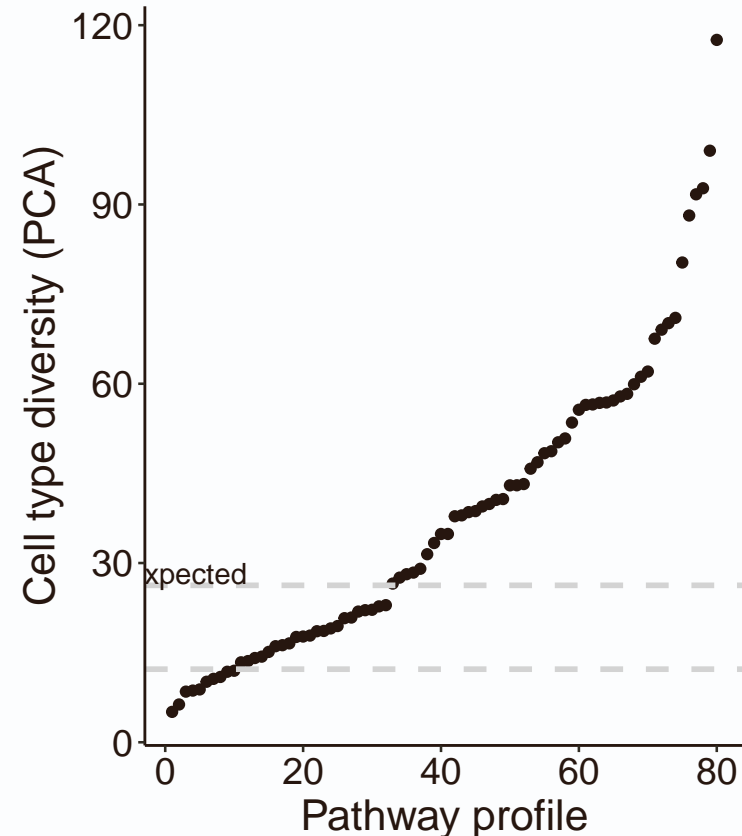

## Motifs, Dispersion $\geq 90^{\text{th}}$ percentile

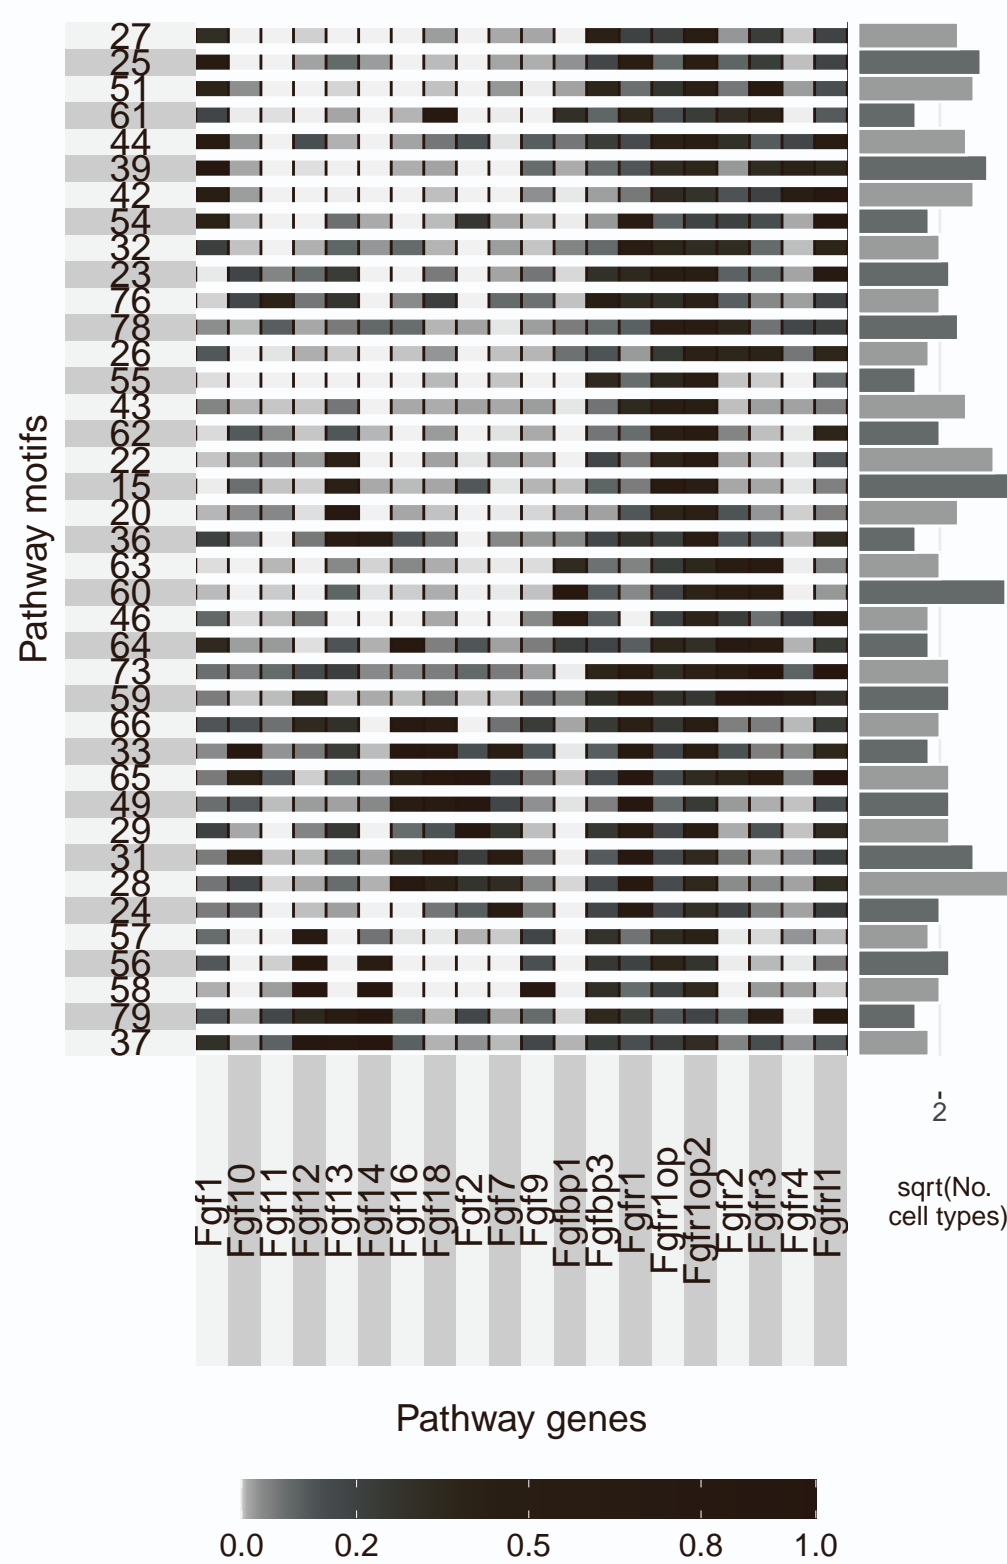

## Motif Tissue Composition

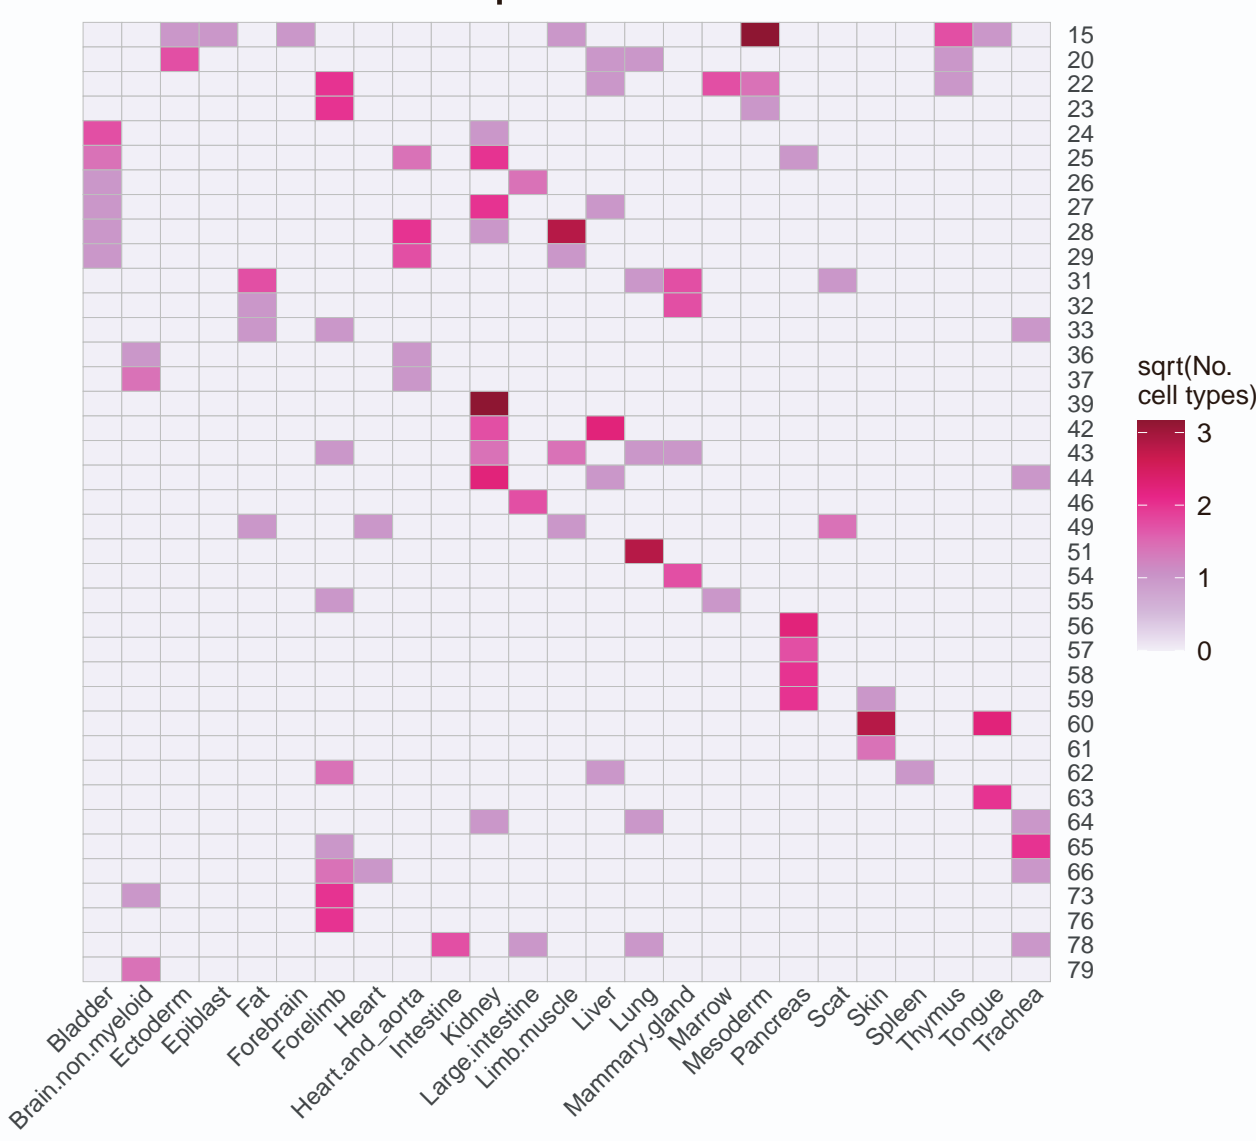

# FGF cell signaling proteins (k\_opt = 80)

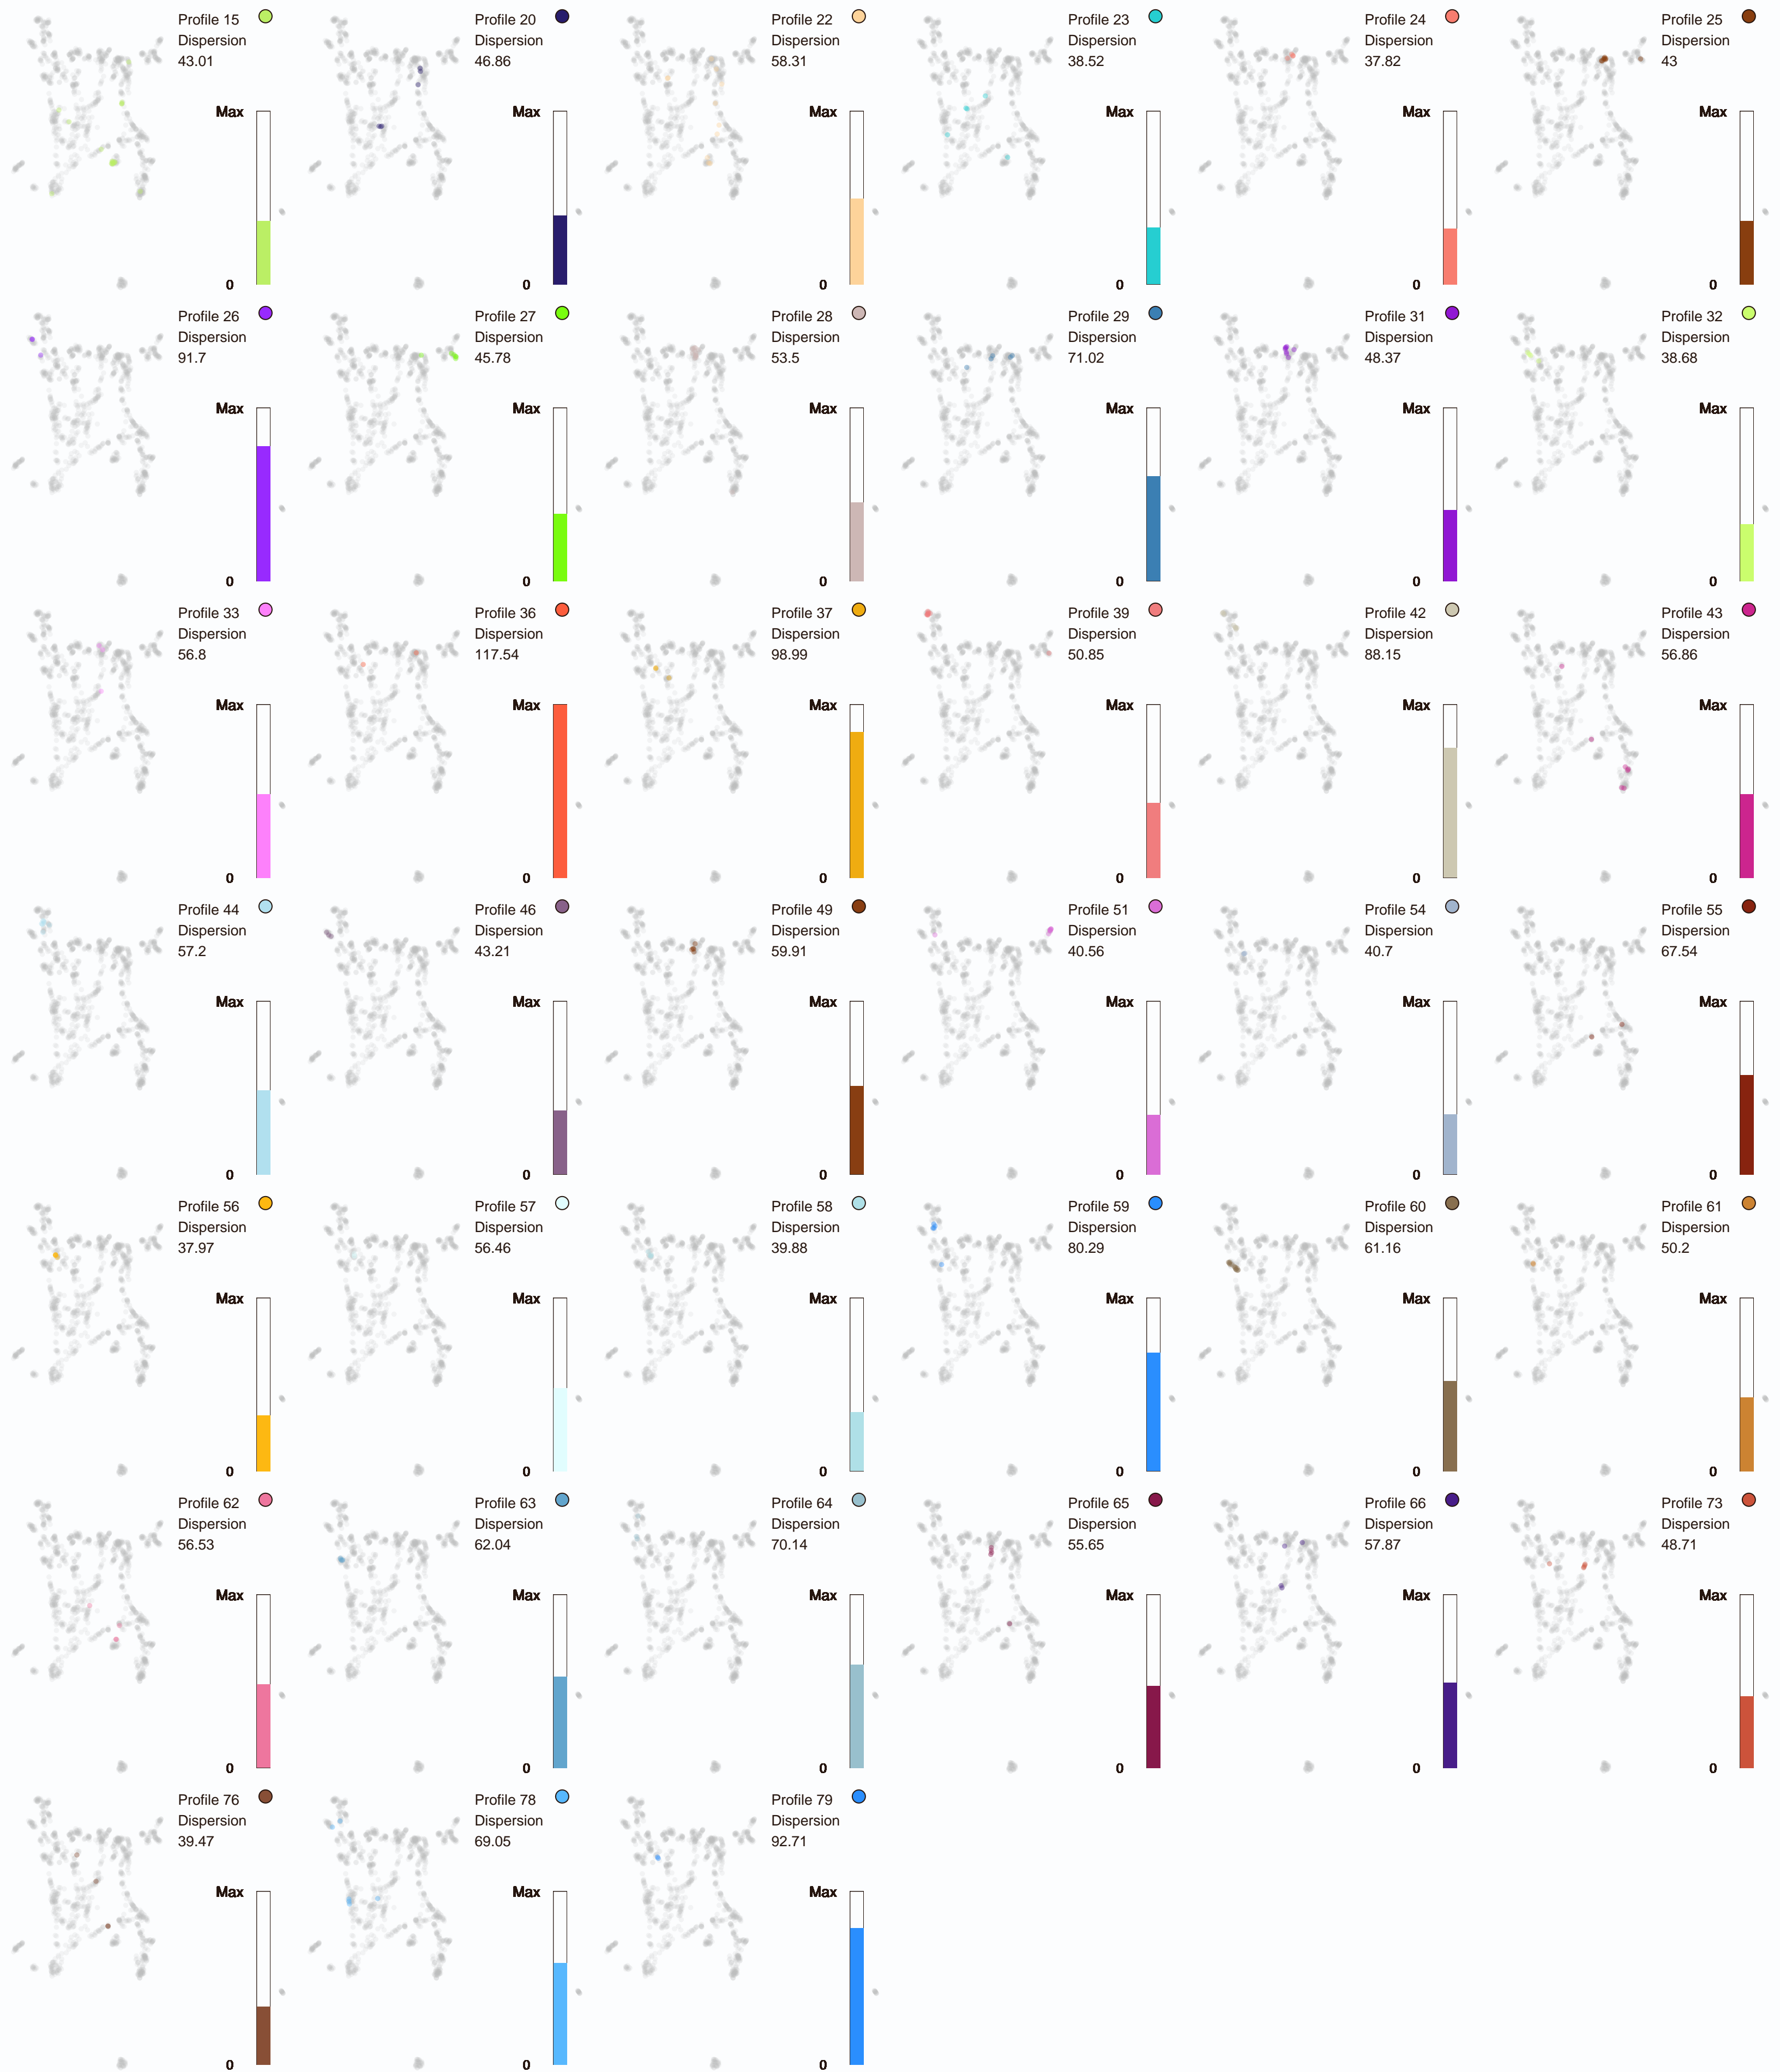

# Frizzled and Lrp5 6 receptors for Wnt B Catenin Signaling (k\_opt = 37)

Pathway genes

|      |      |       |
|------|------|-------|
| Fzd1 | Fzd5 | Fzd9  |
| Fzd2 | Fzd6 | Fzd10 |
| Fzd3 | Fzd7 | Lrp5  |
| Fzd4 | Fzd8 | Lrp6  |

## Gene Co-Expression Above Threshold

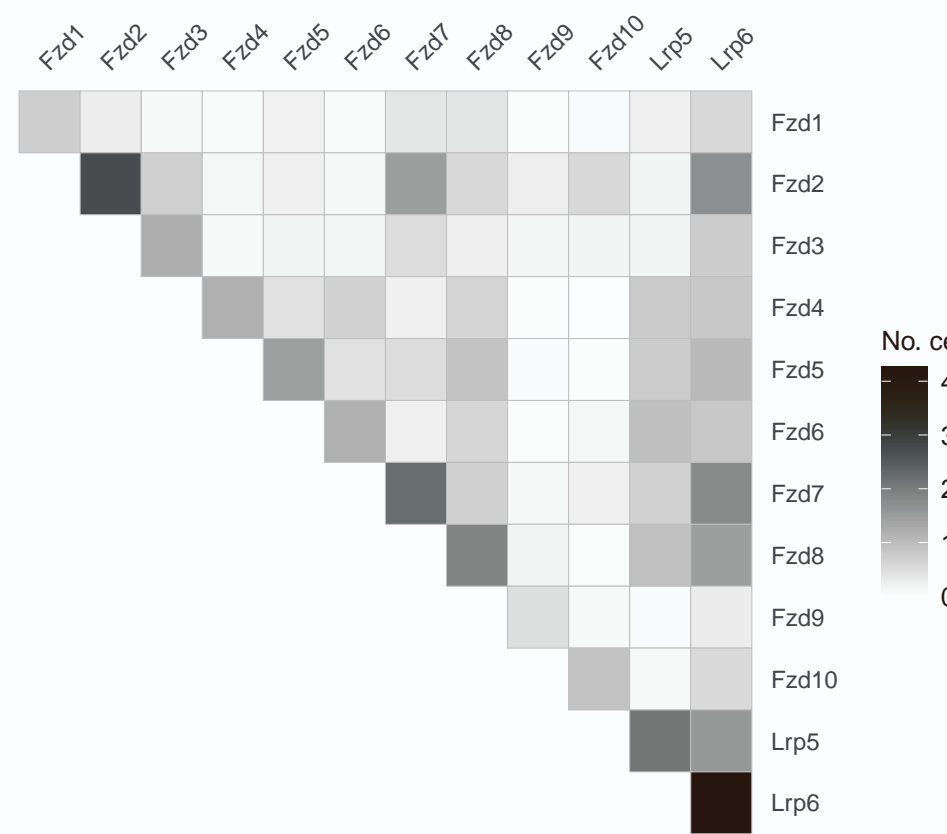

## Silhouette and Z-score

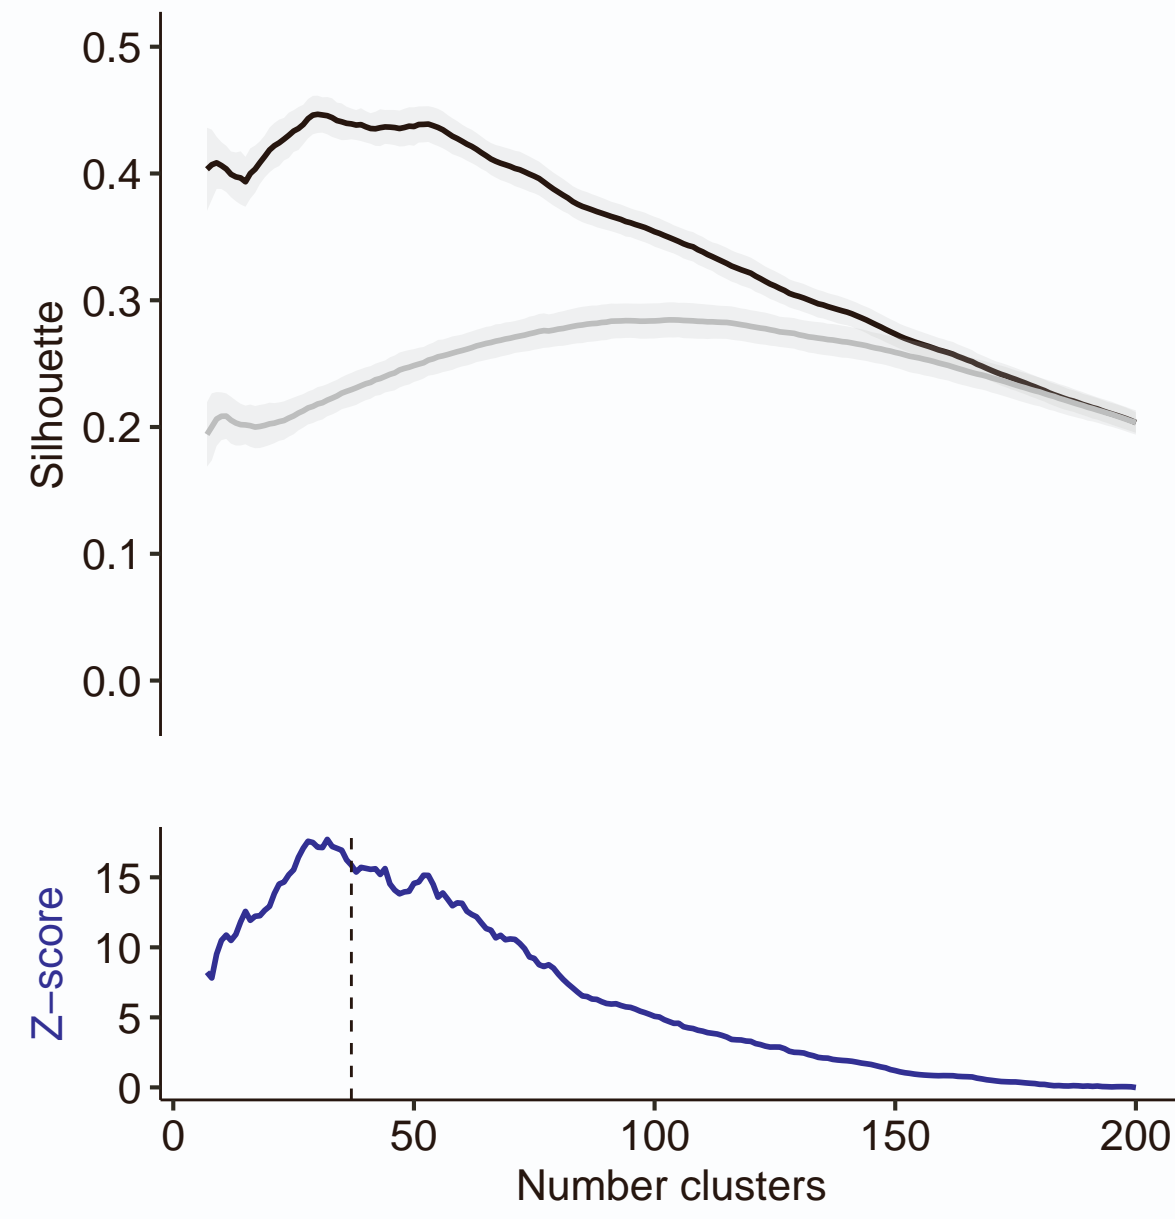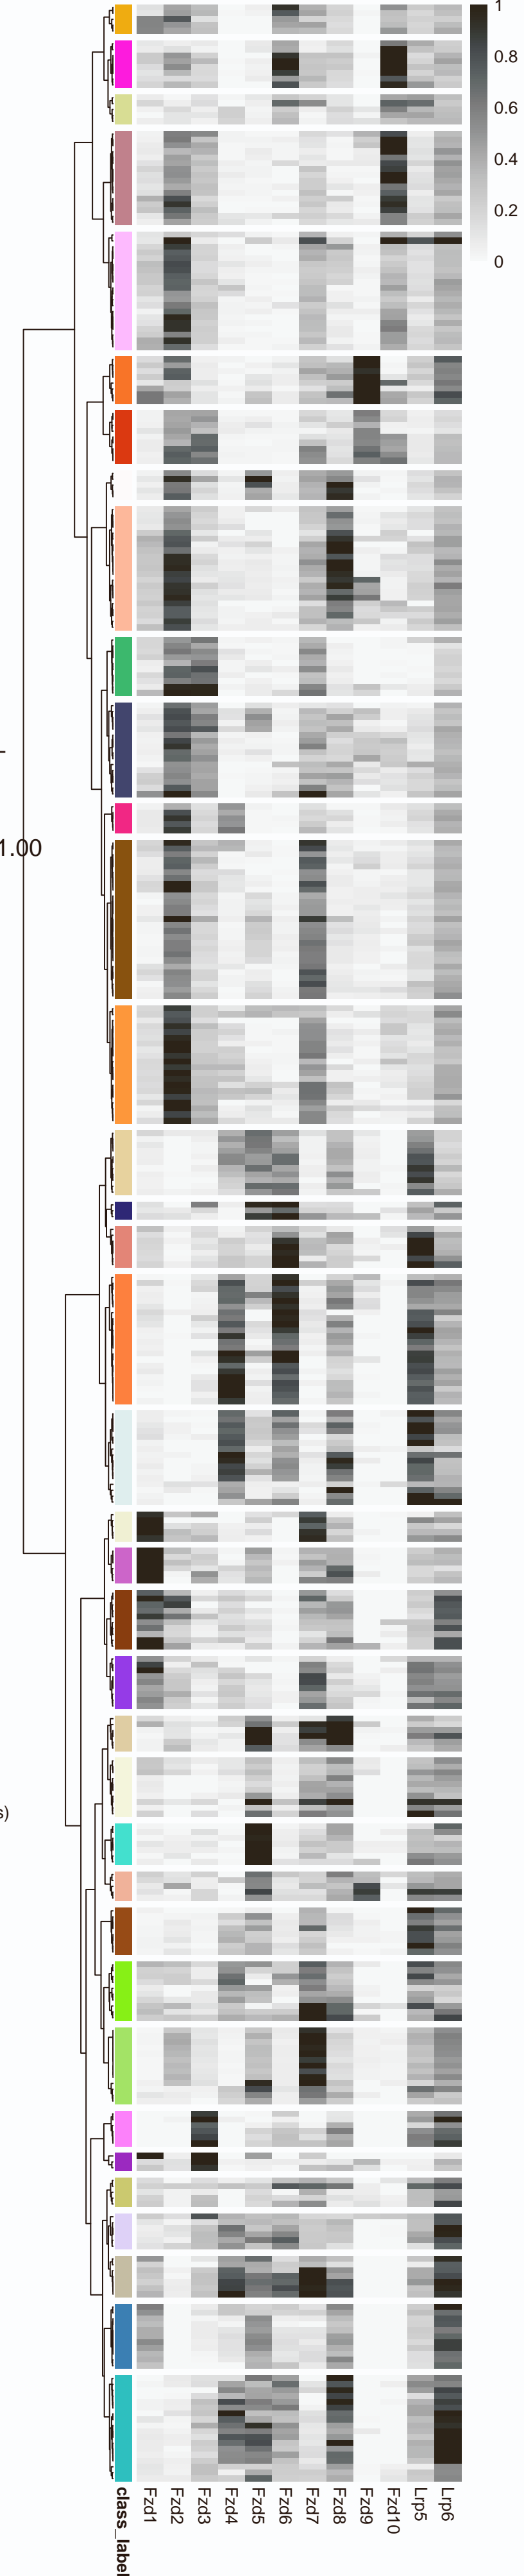

## Global UMAP: Pathway ON

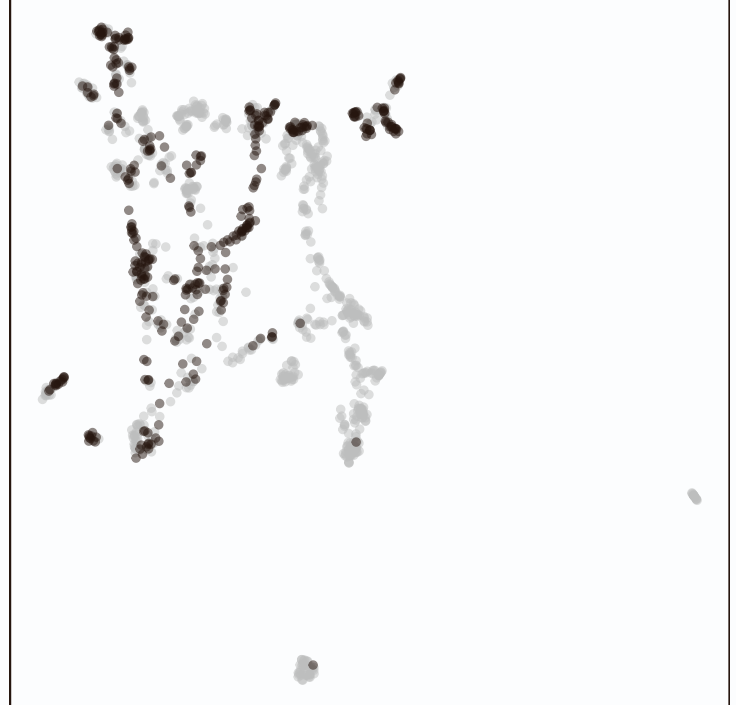

## ECDF of Profile Dispersions

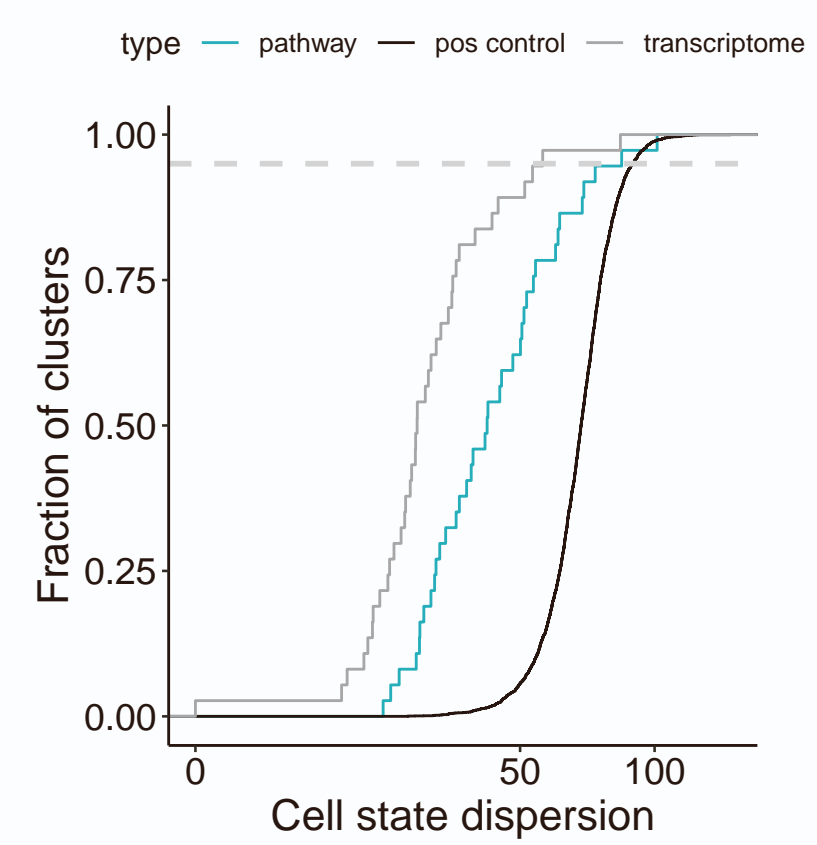

## Profile Dispersion Plot

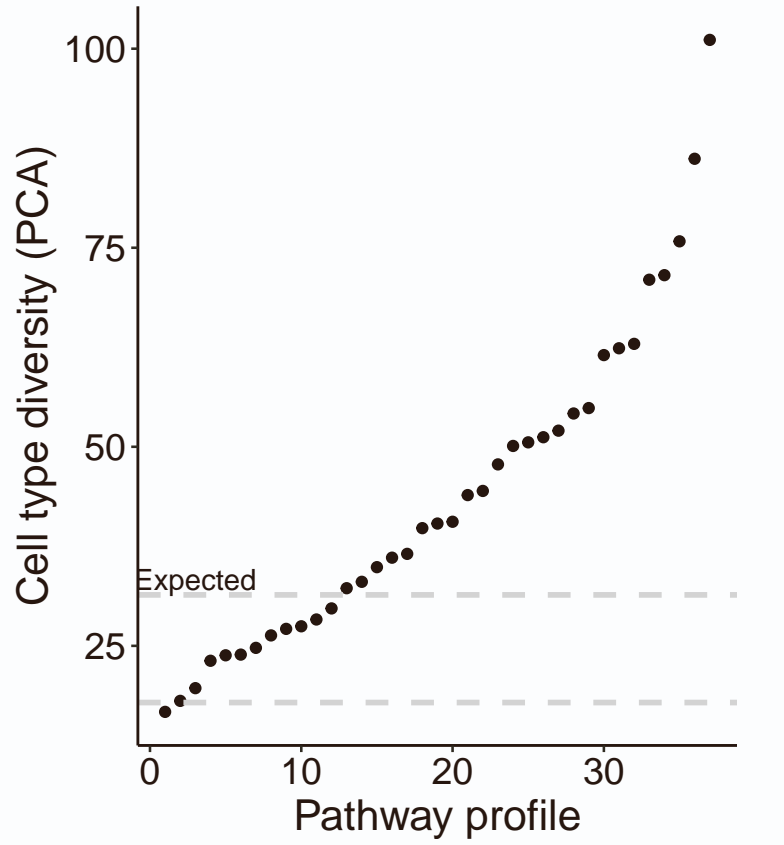

## Motifs, Dispersion $\geq 90^{\text{th}}$ percentile

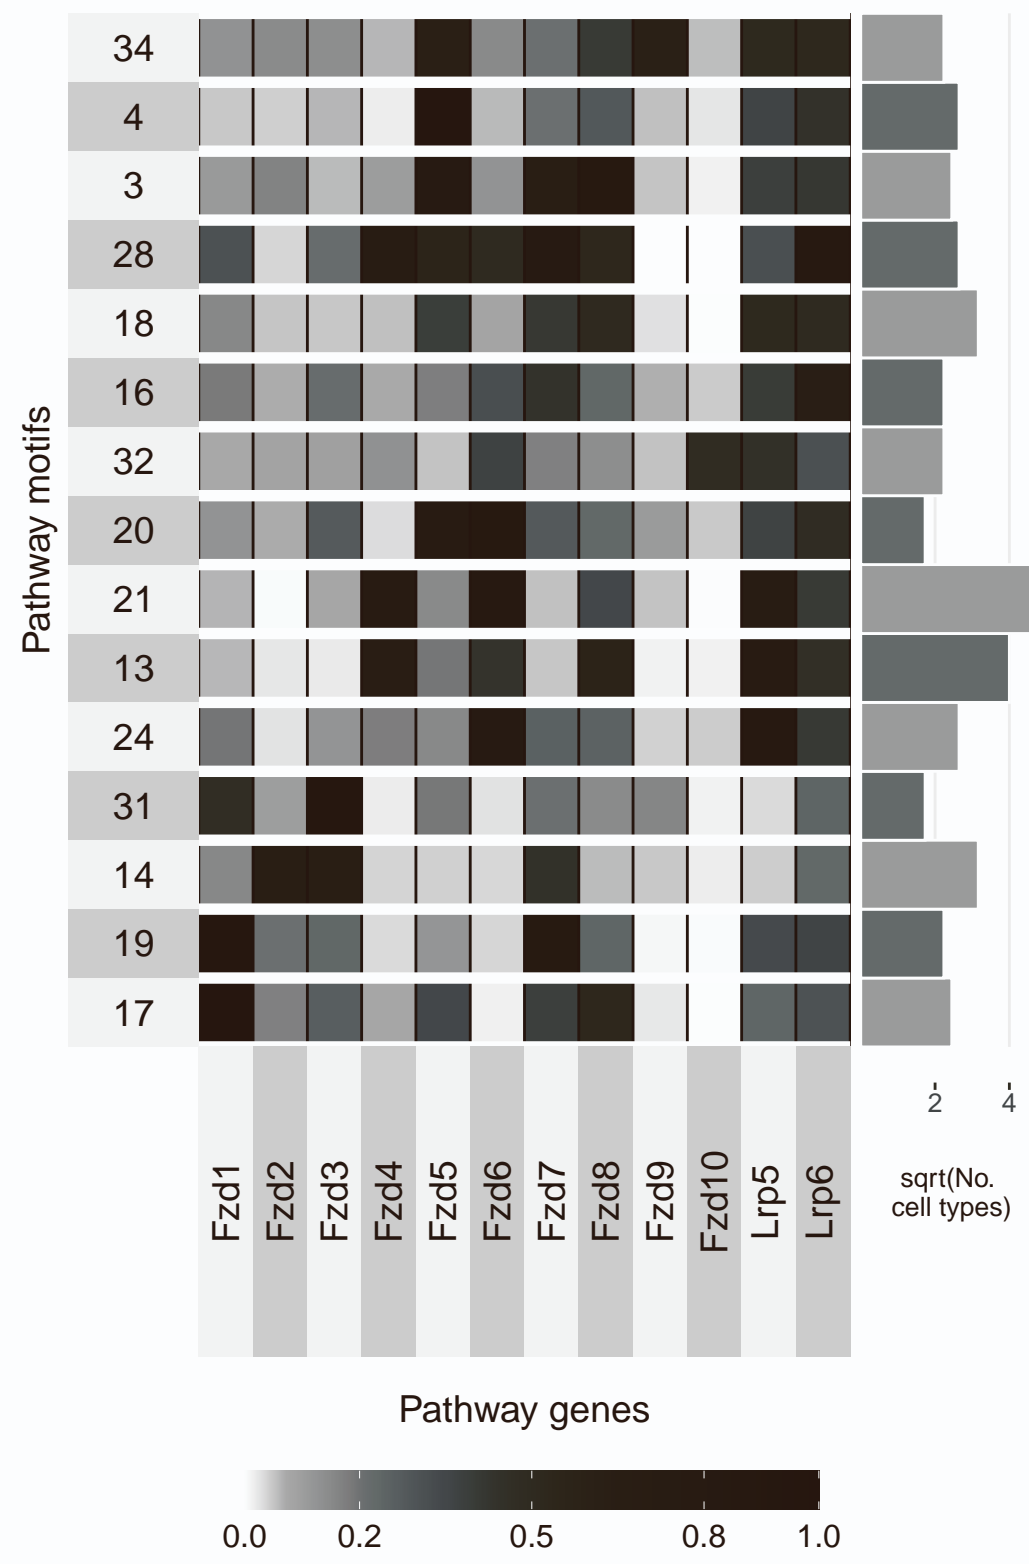

## Motif Tissue Composition

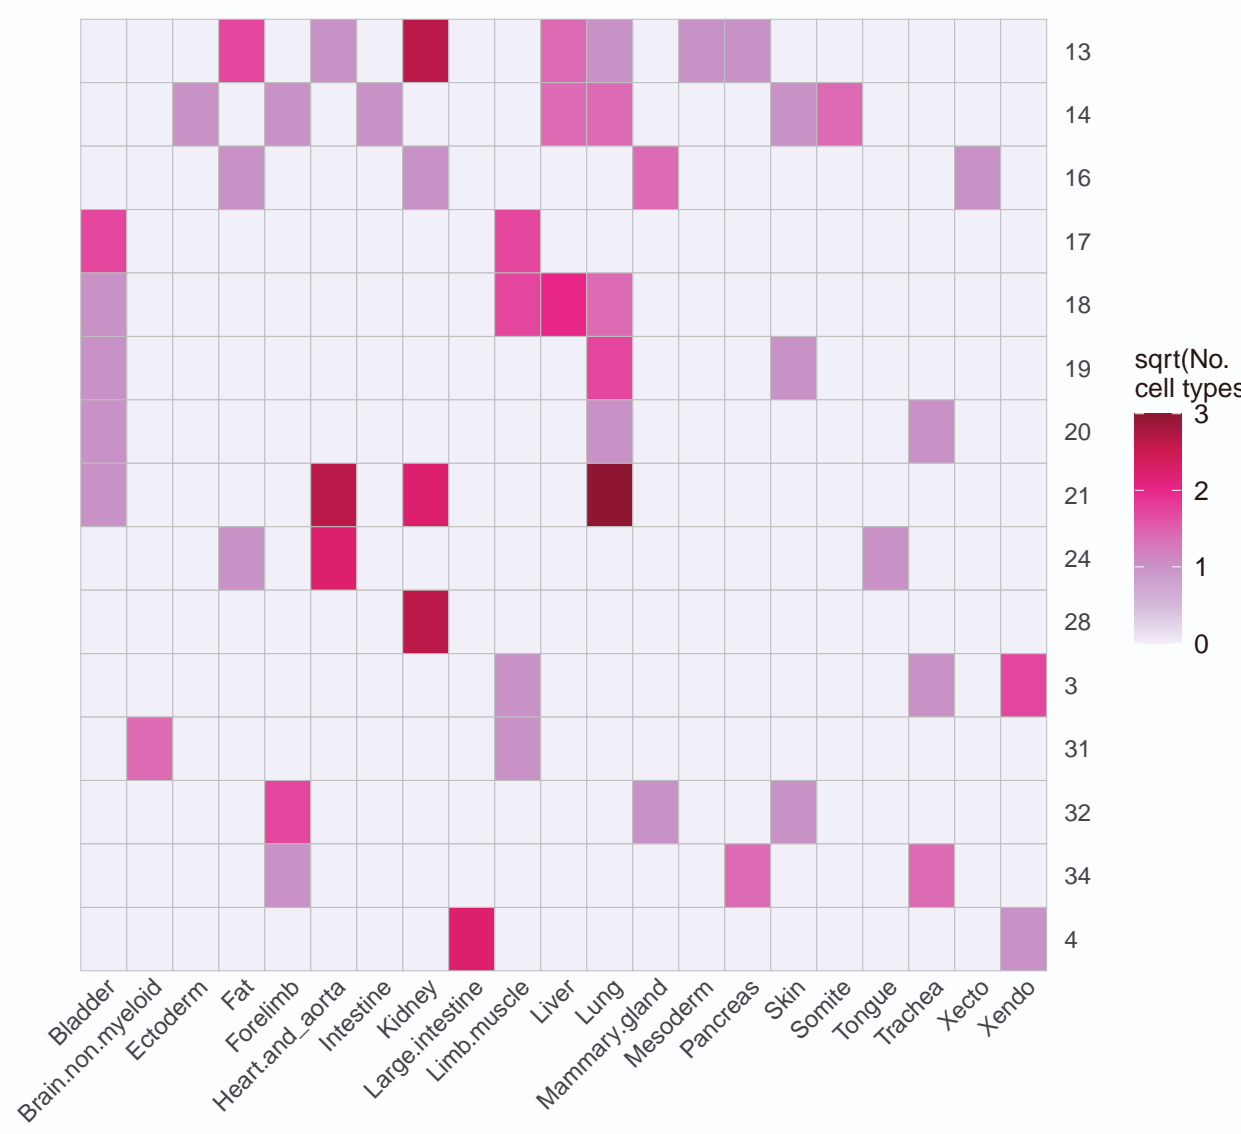



# Frizzled and Lrp5 6 receptors for Wnt B Catenin Signaling (k\_opt = 37)

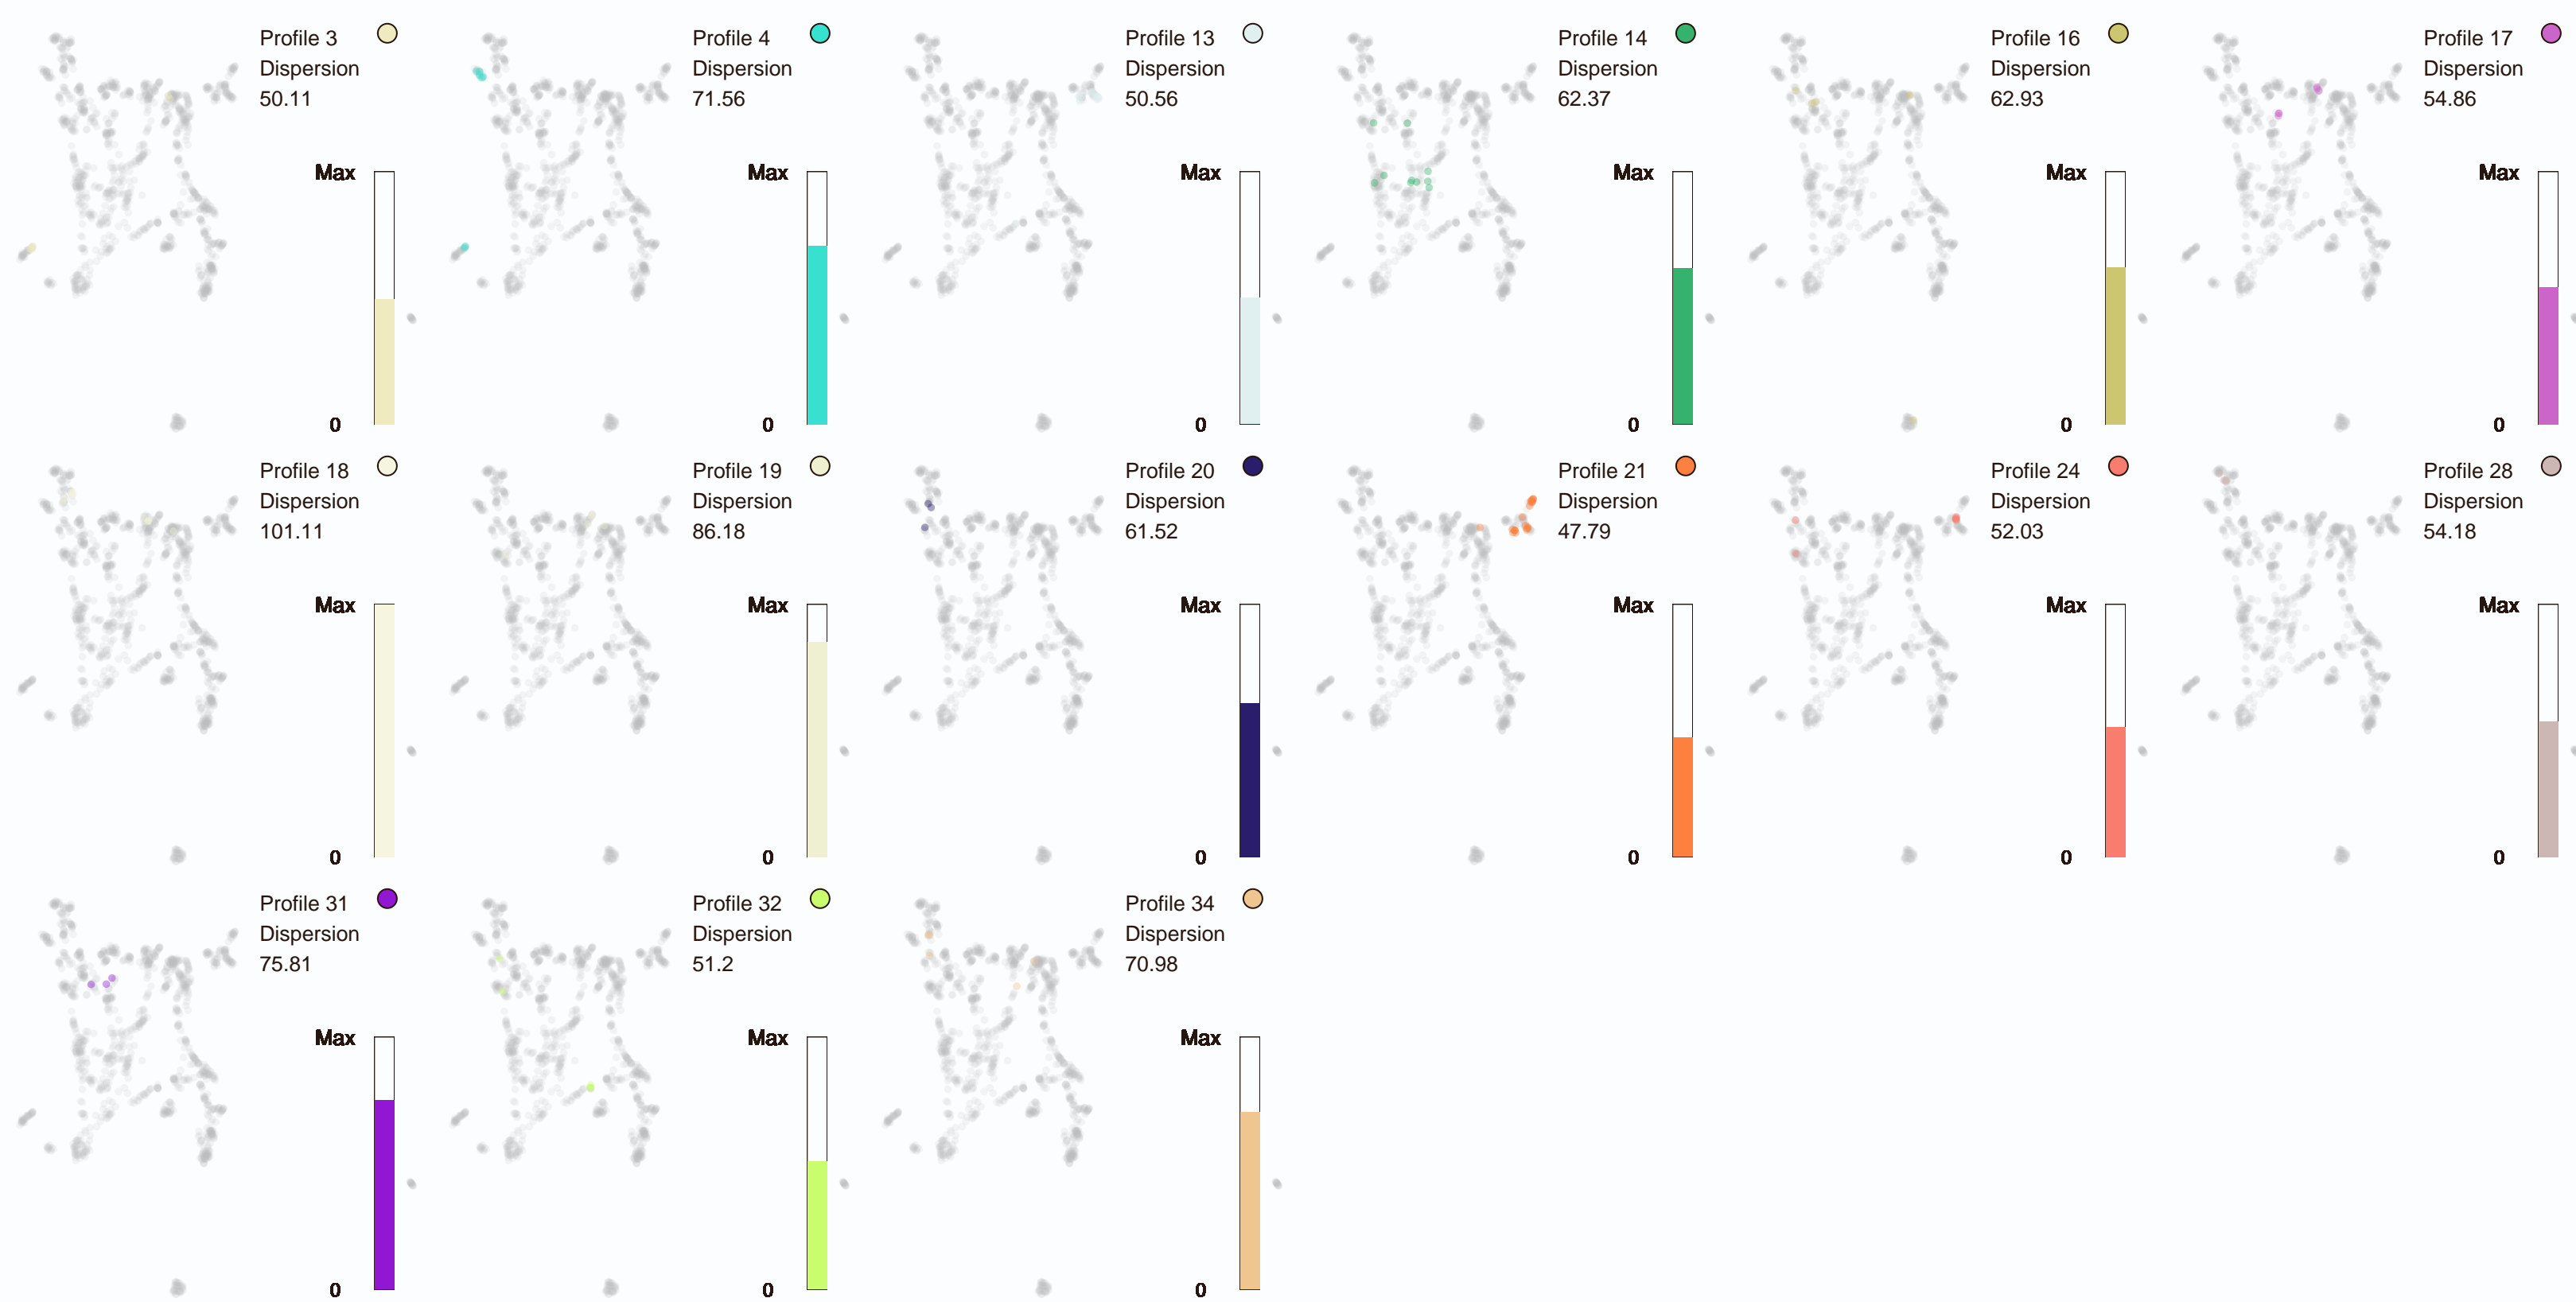

# Cellular Signalling Through Adenosine Receptor A2a and Adenosine (k\_opt = ...)

Gene Co-Expression Above Threshold

Adora2a, Gng12, Gnb1, Gnas, Prkacb, Creb1, Rap1a, Map2k2, Braf, Mapk1, Elk1, Pathway genes: Pik3ca, Arhgef7, Cdc42, Map3k4, Map3k1, Map2k7, Jun, Pak1, Map2k6, Mapk11, Atf2, Pard6a, Prkcz, Rps6ka1, Bad, Pdpk1, Akt1, Chuk, Ikbkb, Nfkb1, Nfkb2

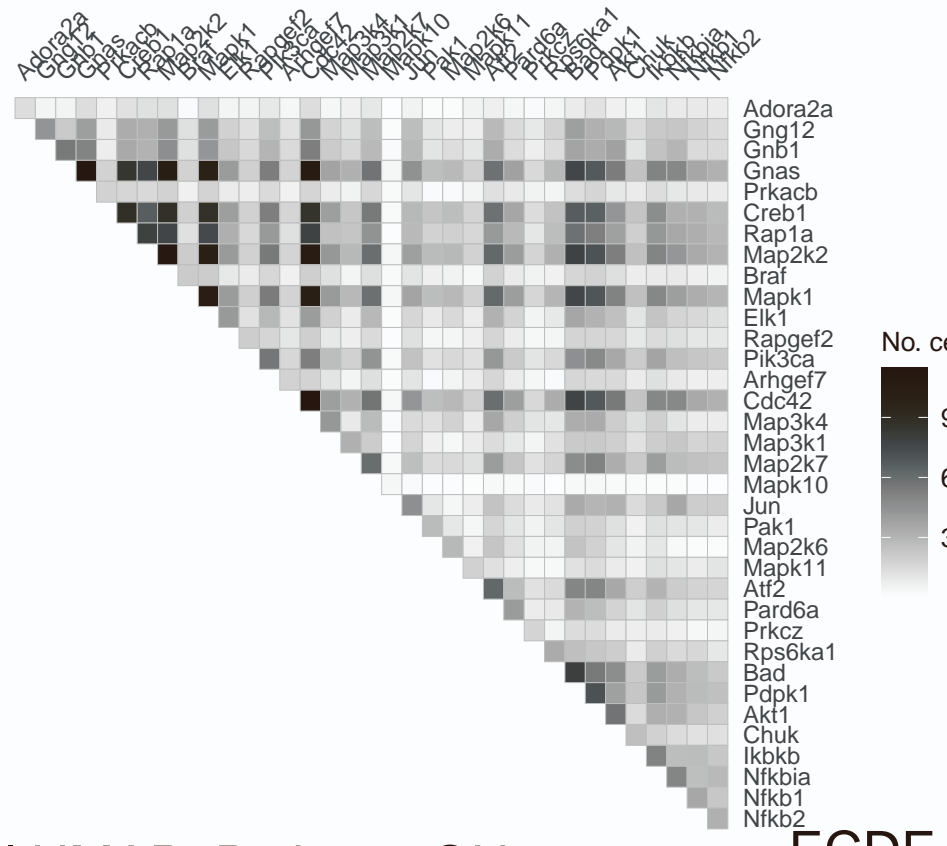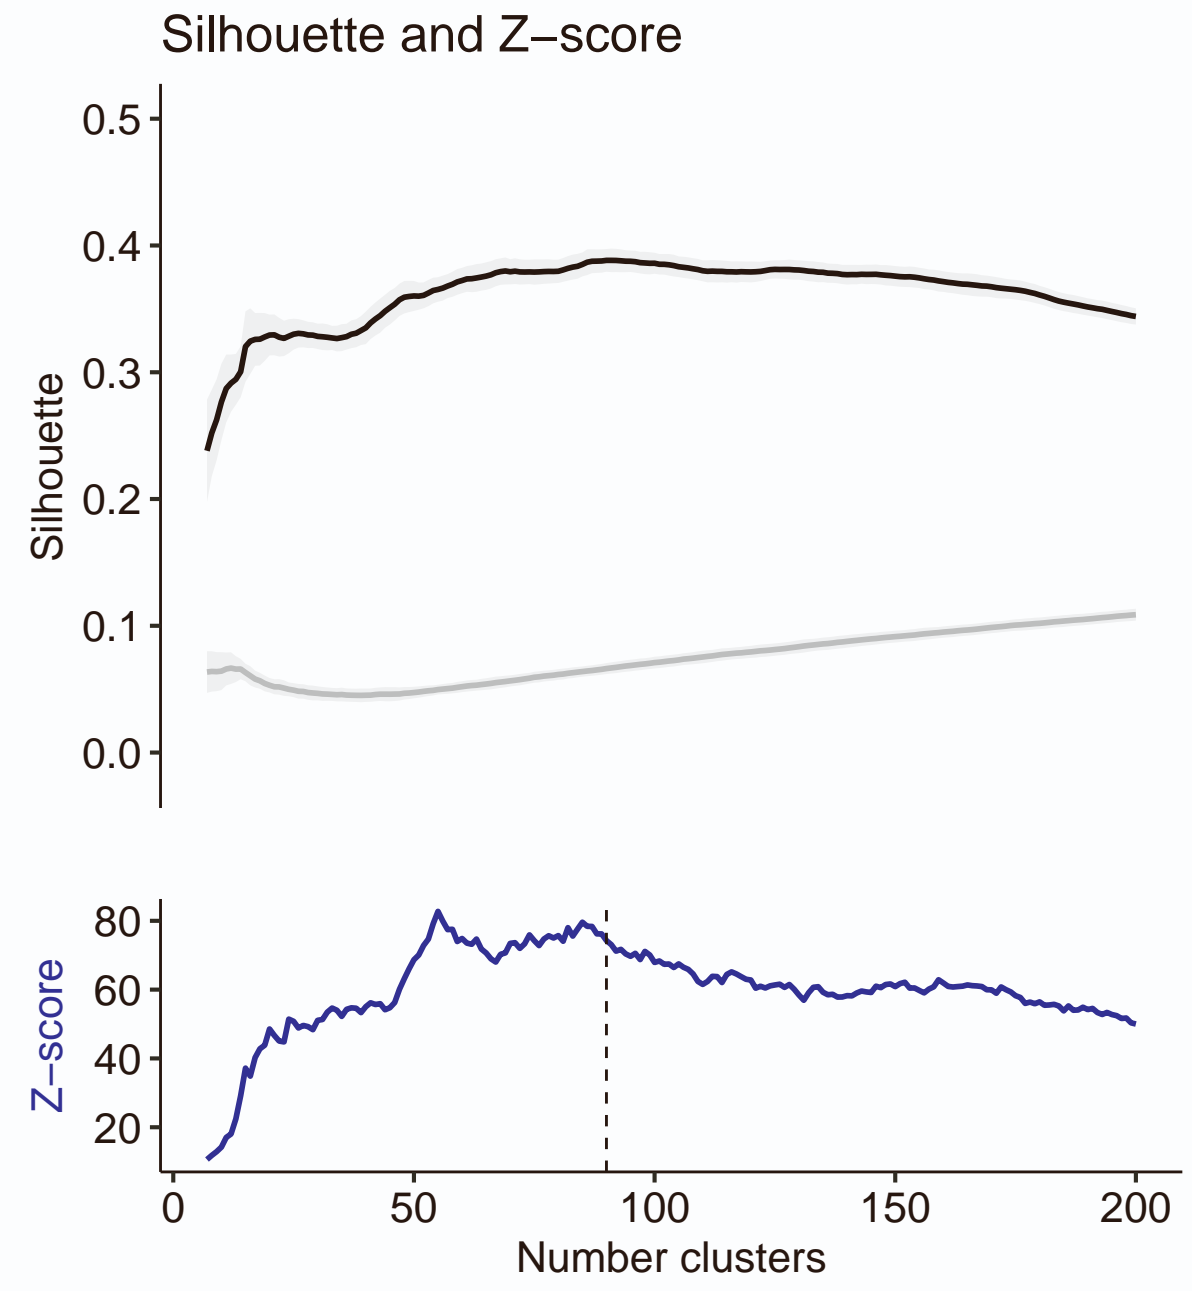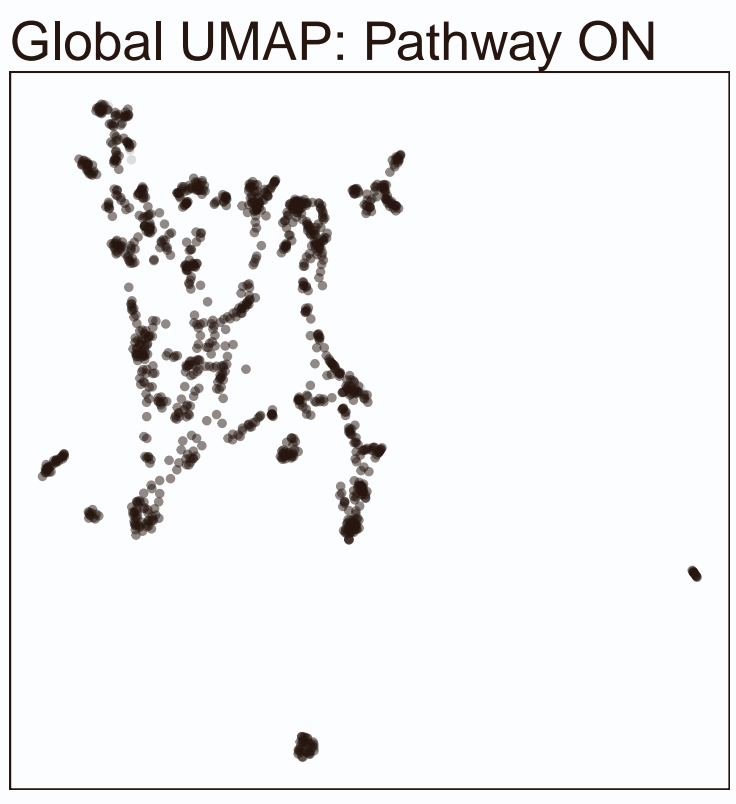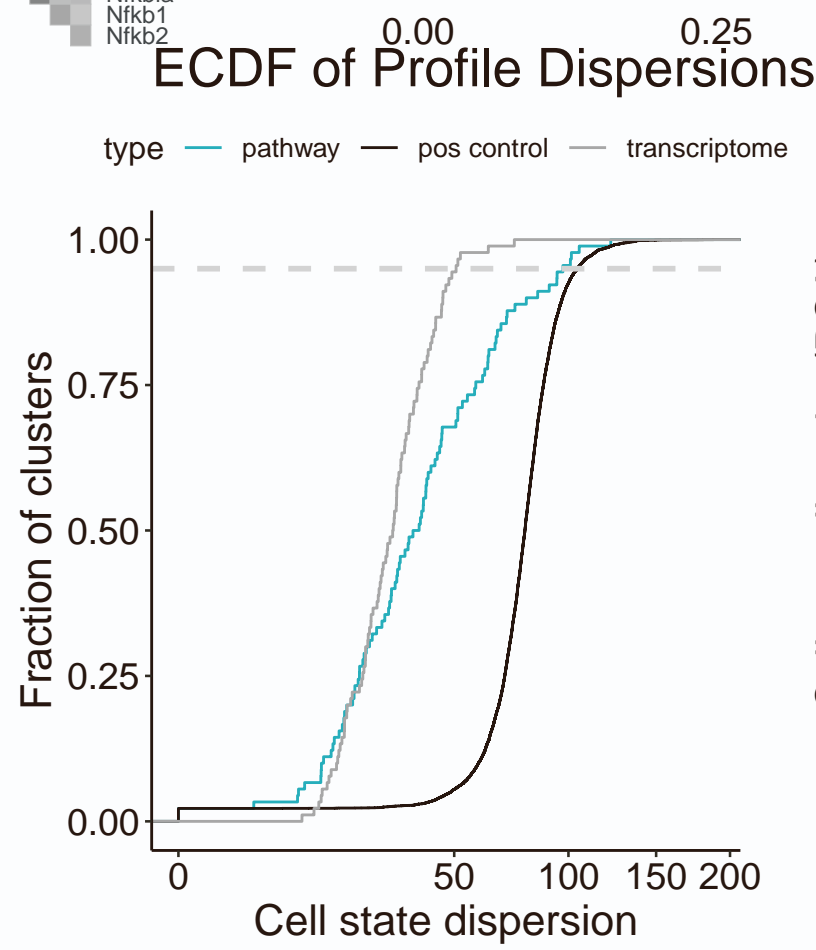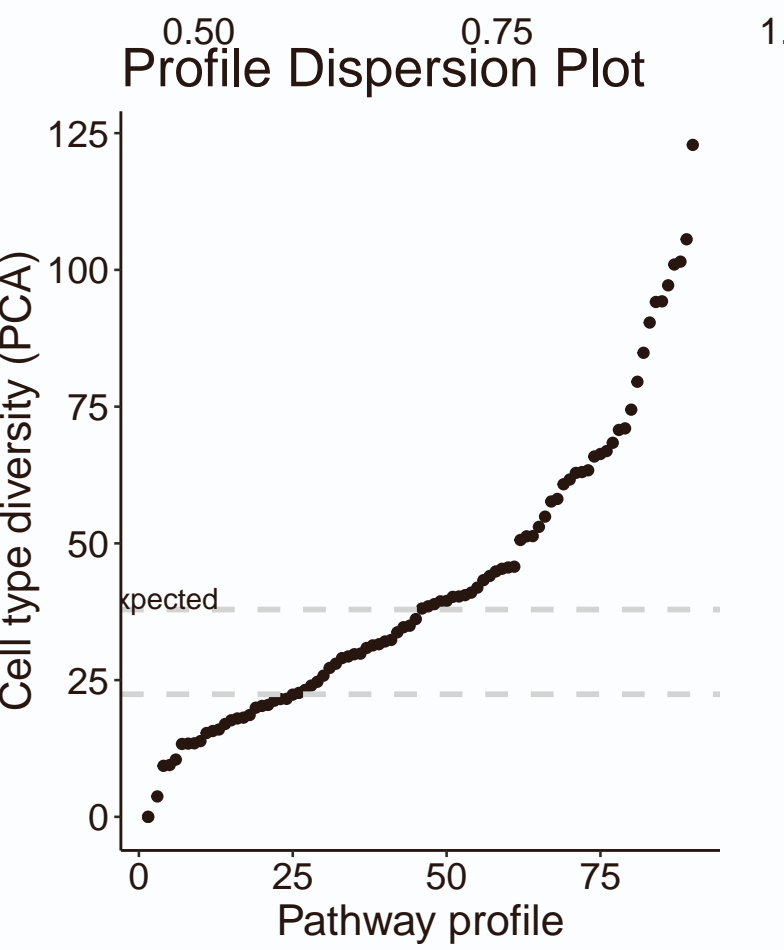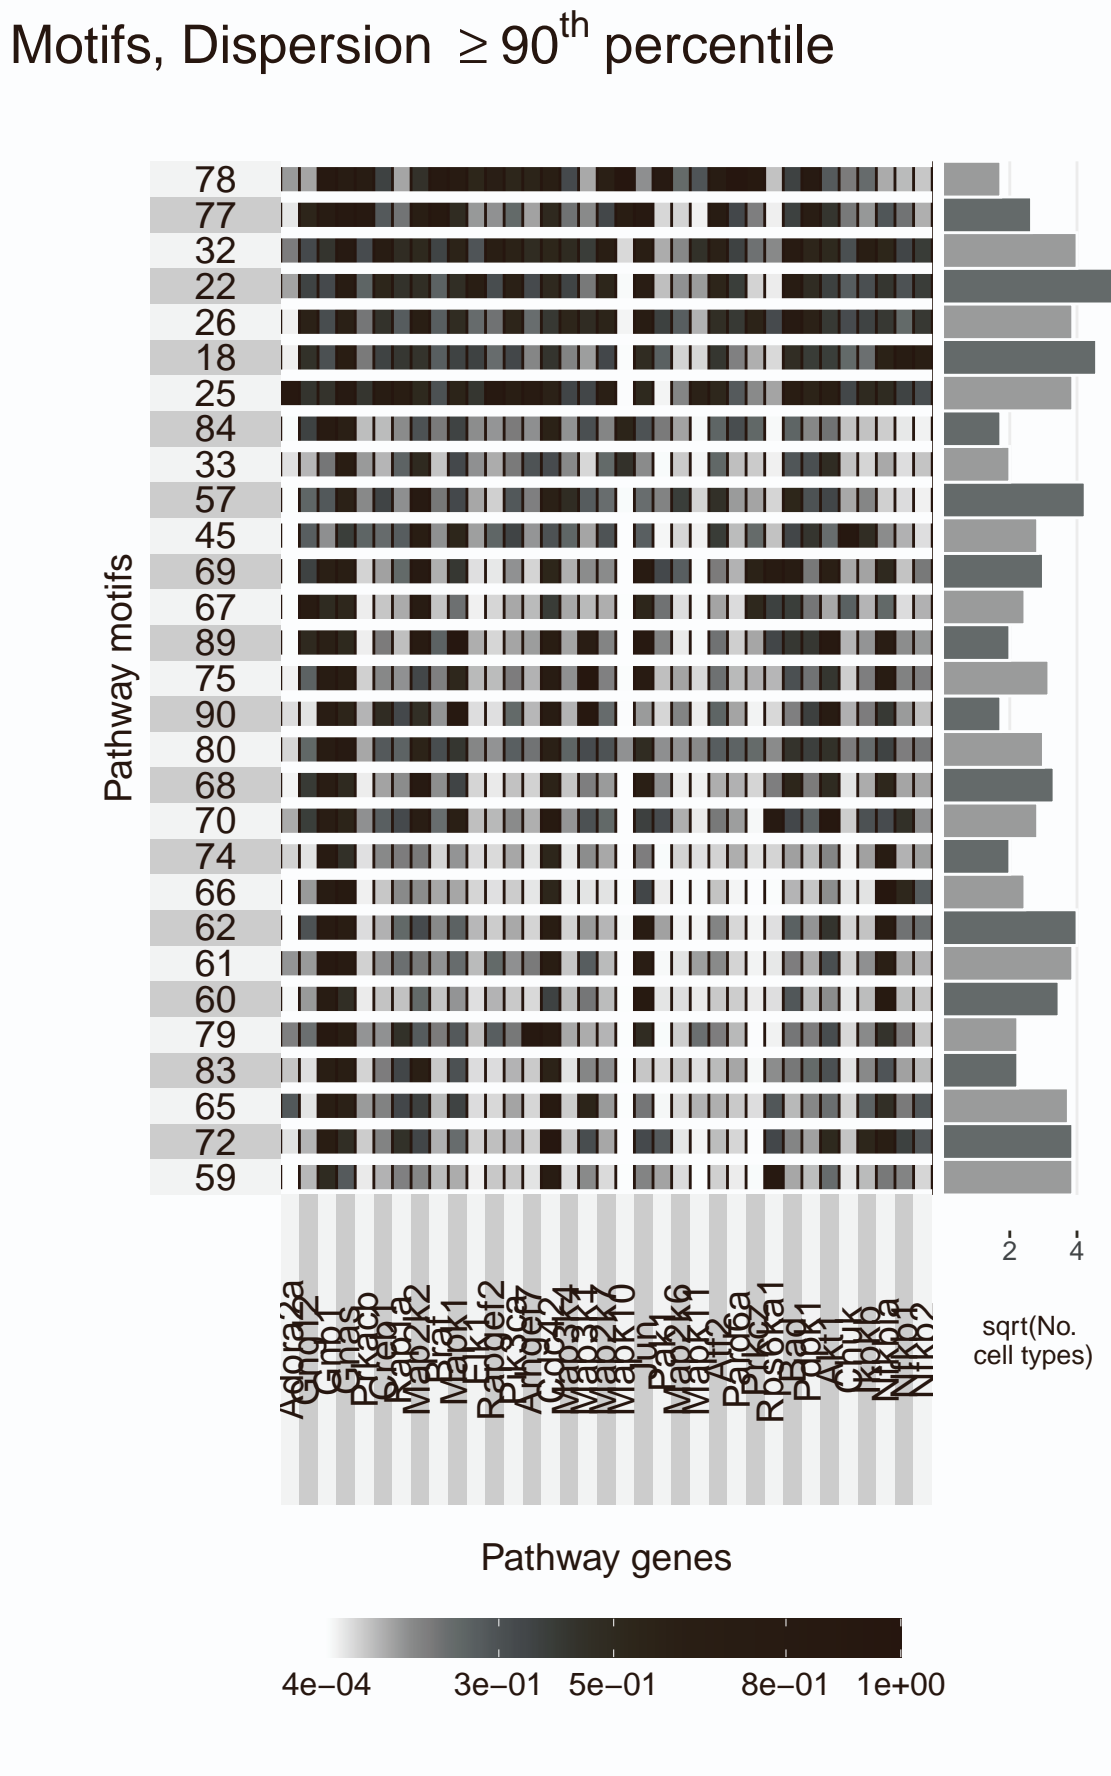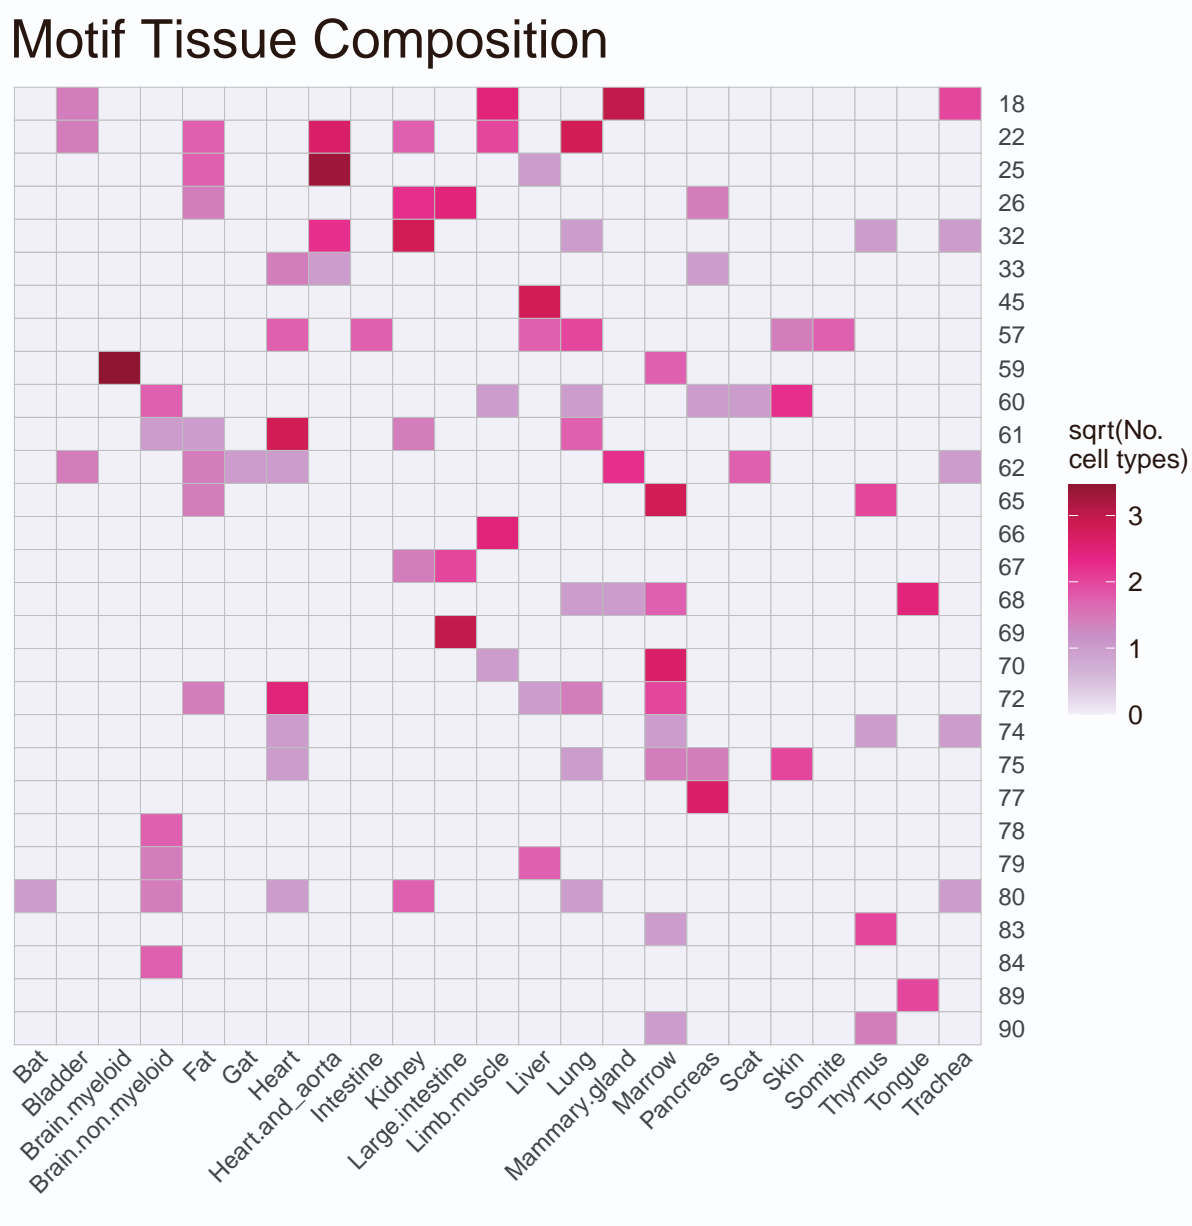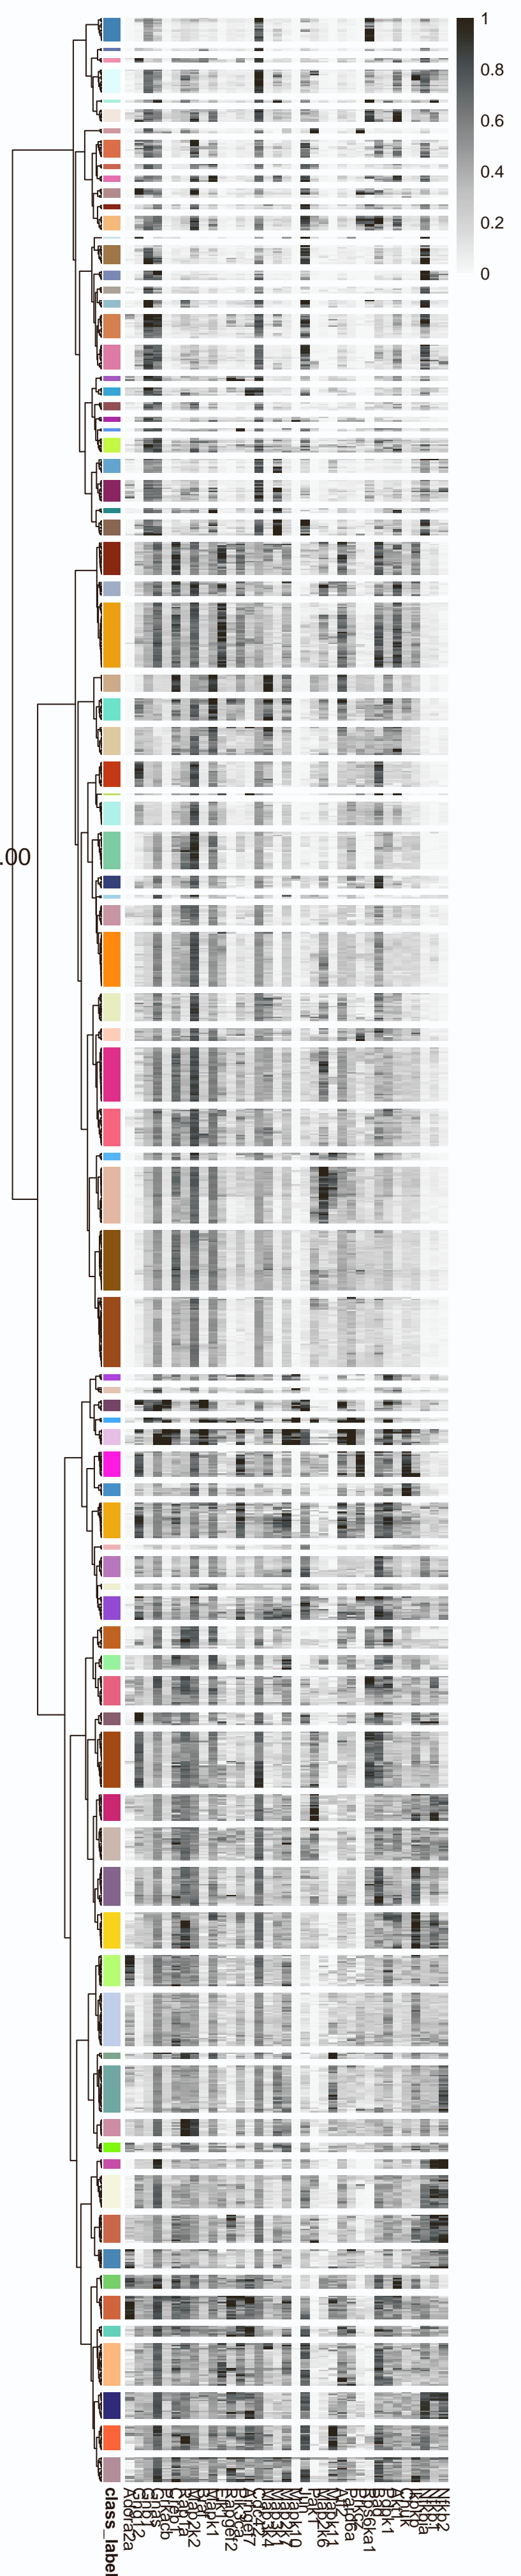

# Cellular Signalling Through Adenosine Receptor A2a and Adenosine (k\_opt =

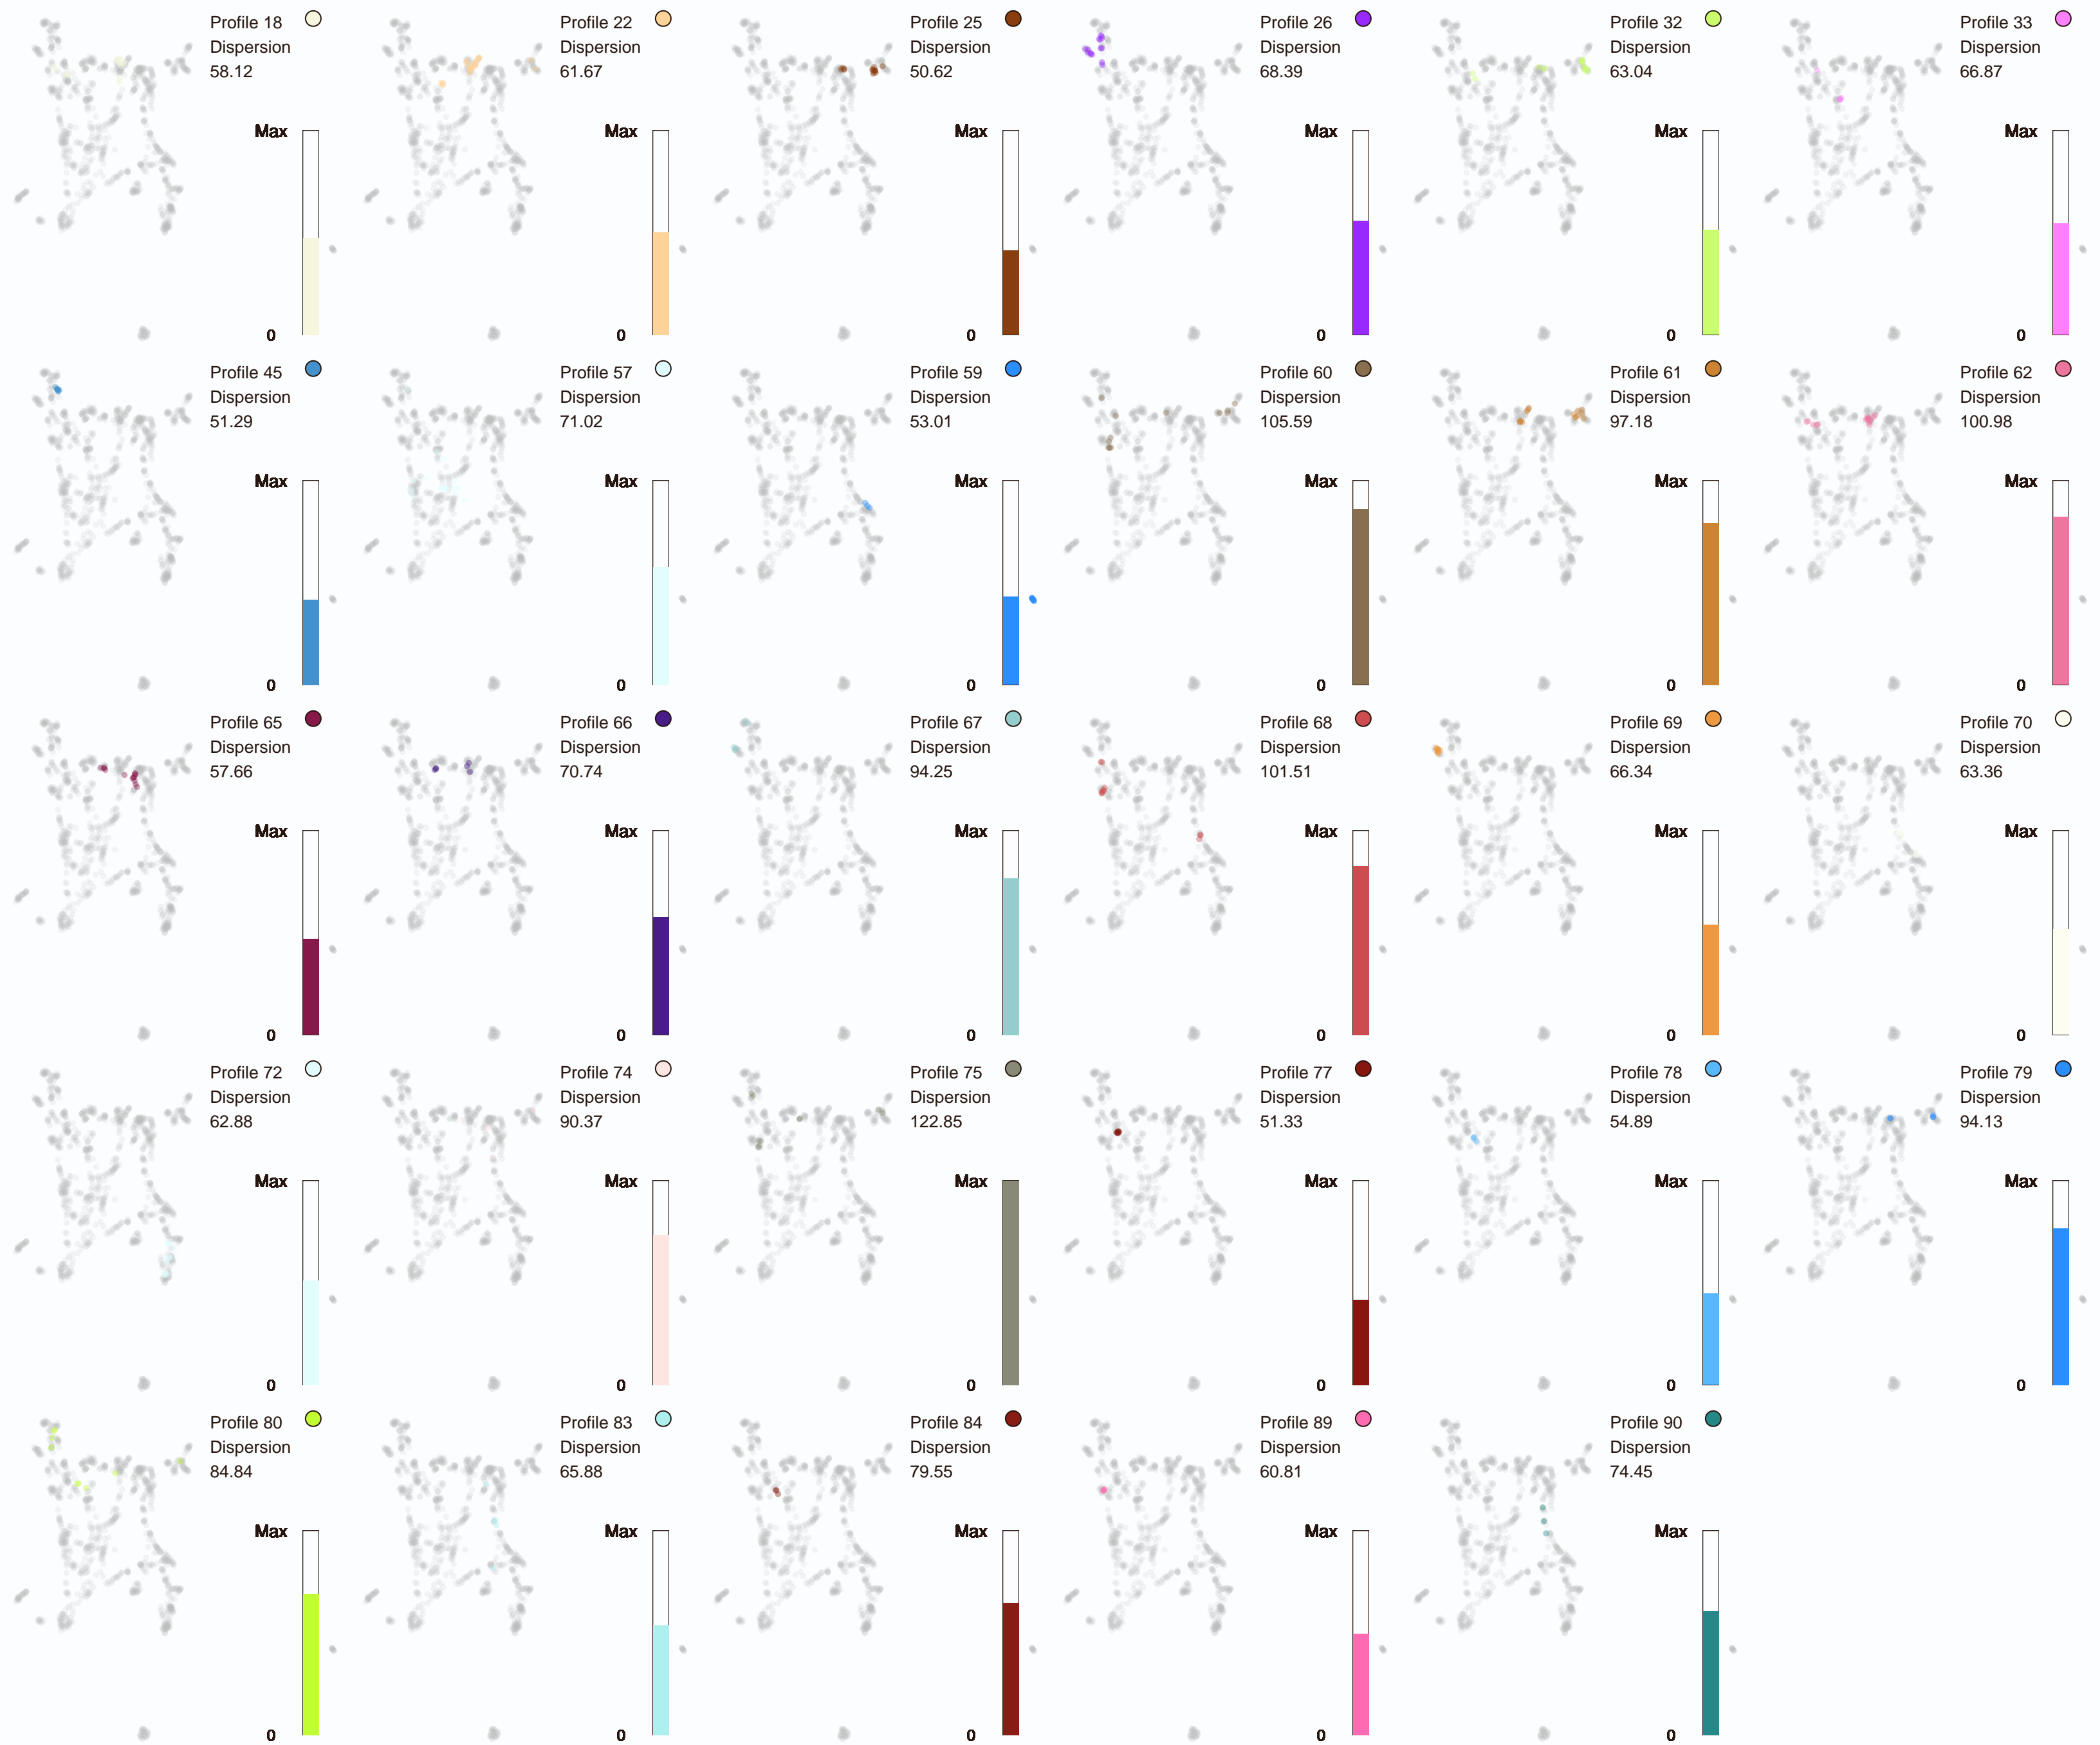

# on Channels and Their Functional Role in Vascular Endothelium (k\_opt = 32)

Adcy10  
Nos3  
Kcnq2

Pathway genes  
Kcnq3  
Trpc3

Prkg2  
Gnb1  
Gnas

## Gene Co-Expression Above Threshold

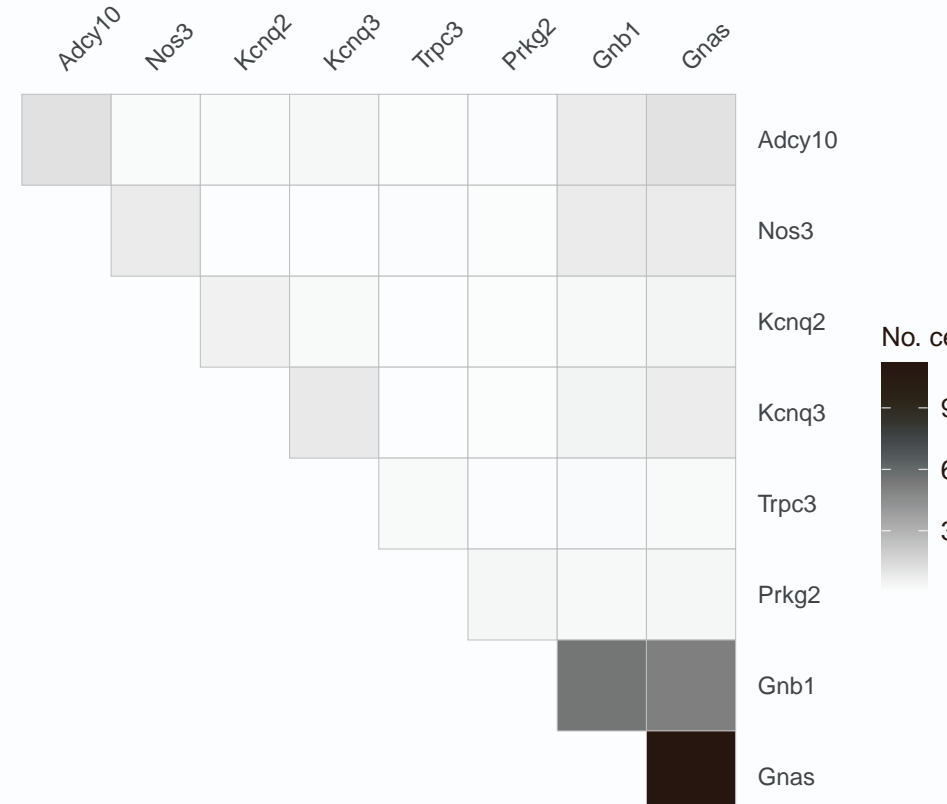

## Silhouette and Z-score

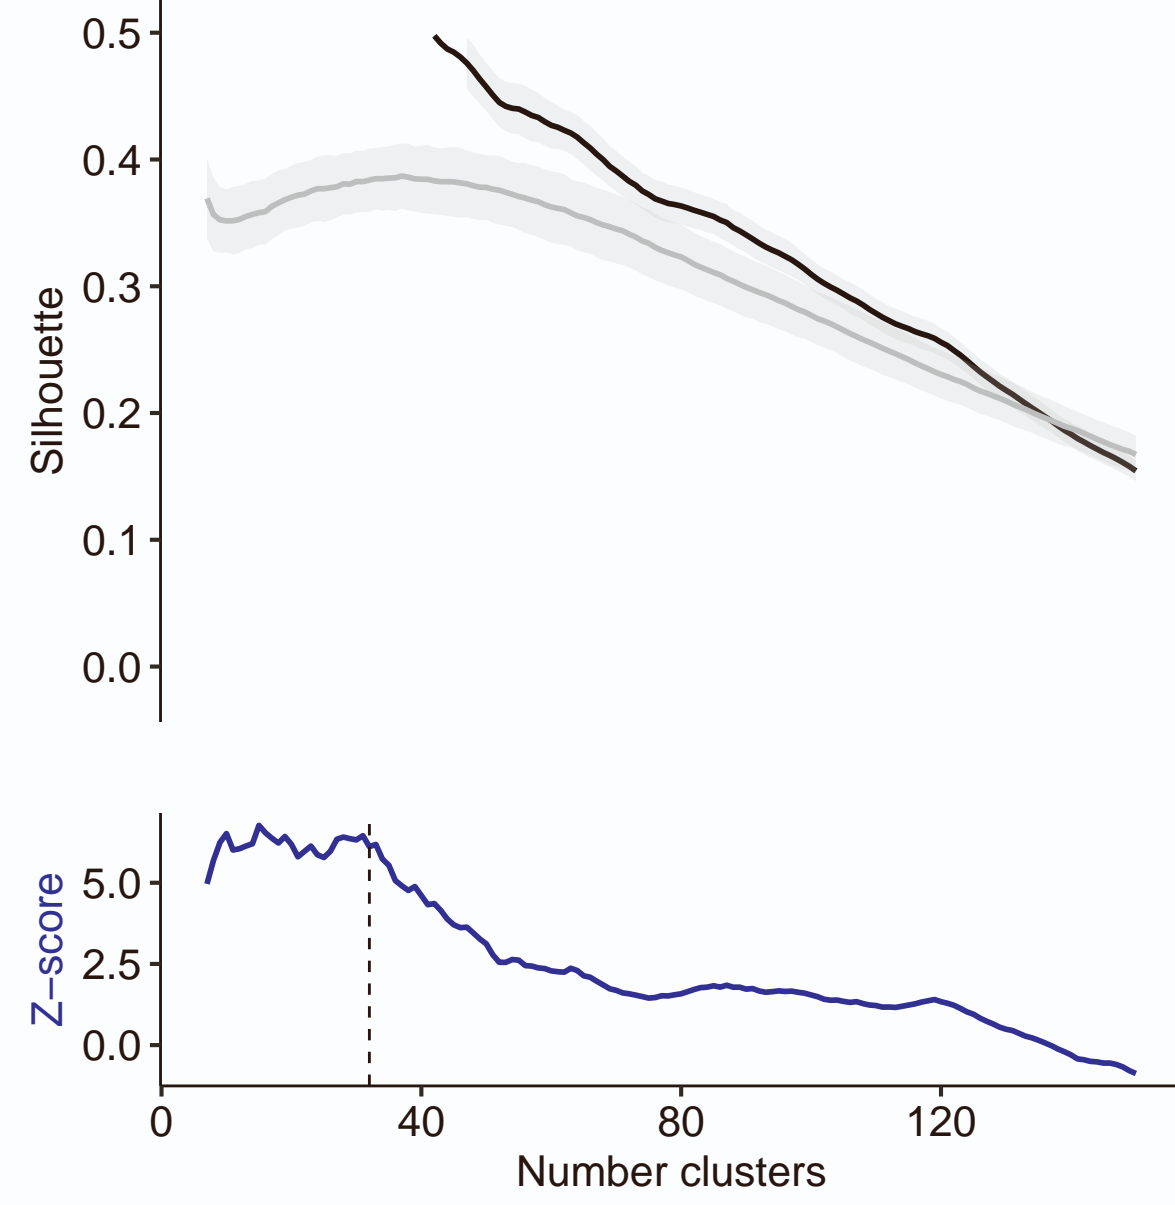

## Global UMAP: Pathway ON

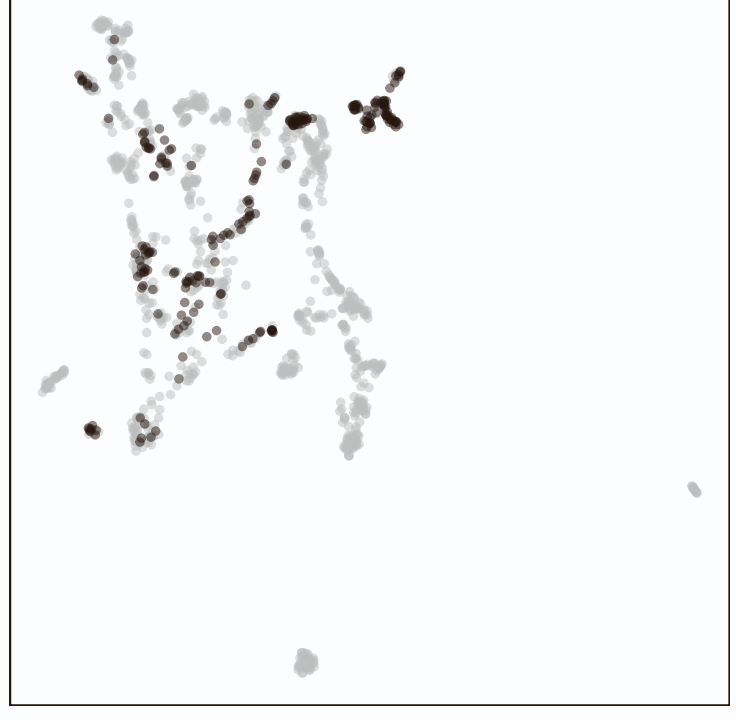

## ECDF of Profile Dispersions

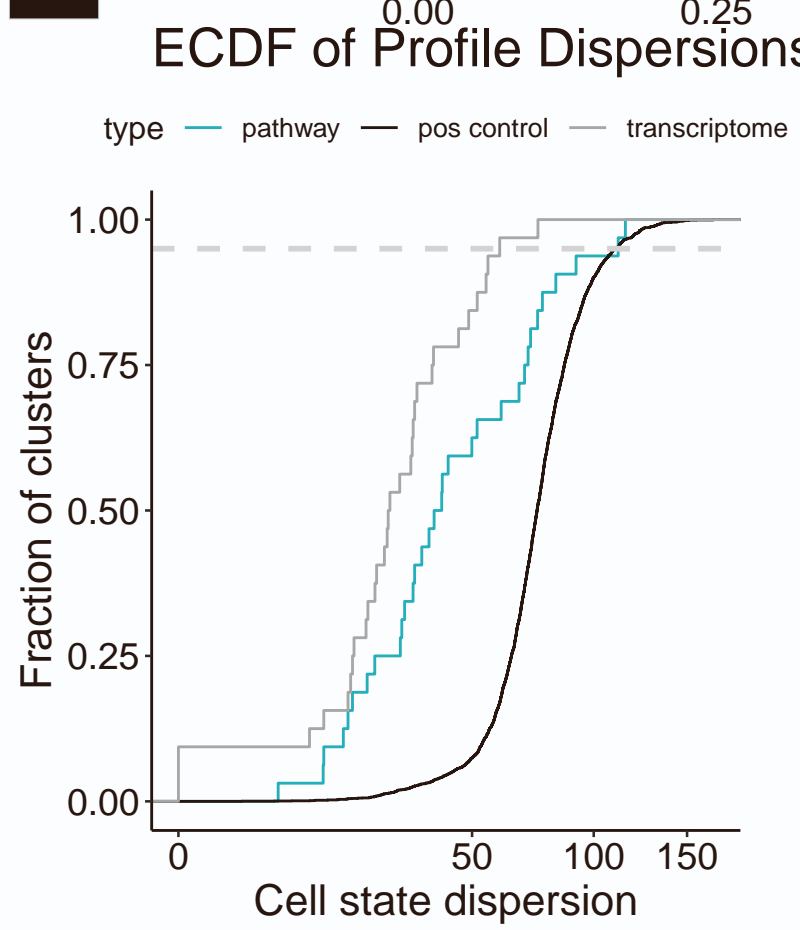

## Profile Dispersion Plot

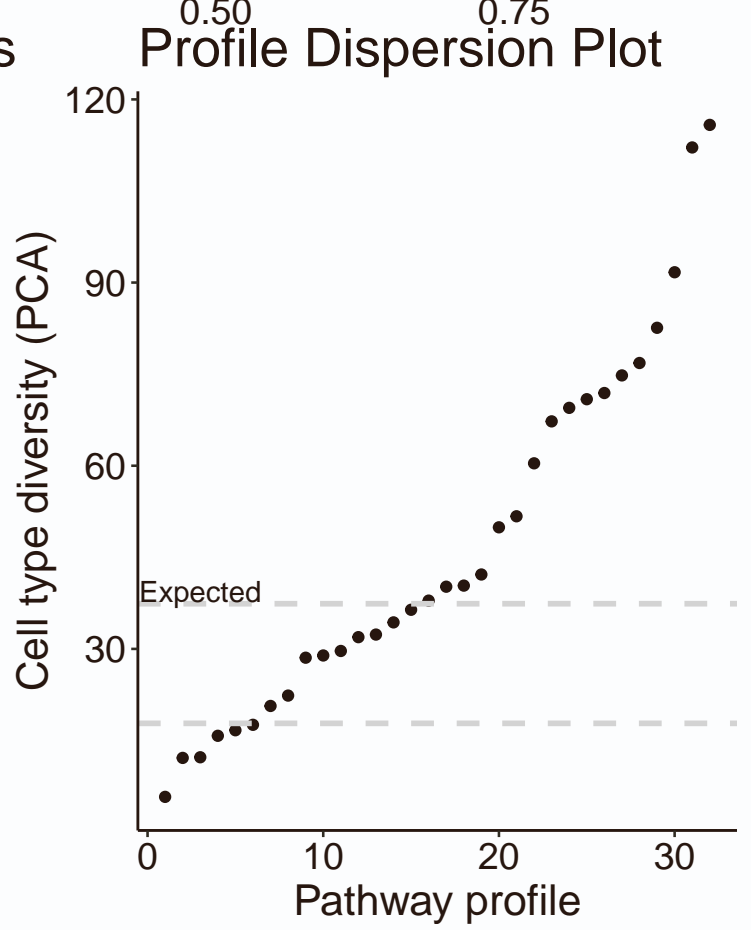

## Motifs, Dispersion $\geq 90^{\text{th}}$ percentile

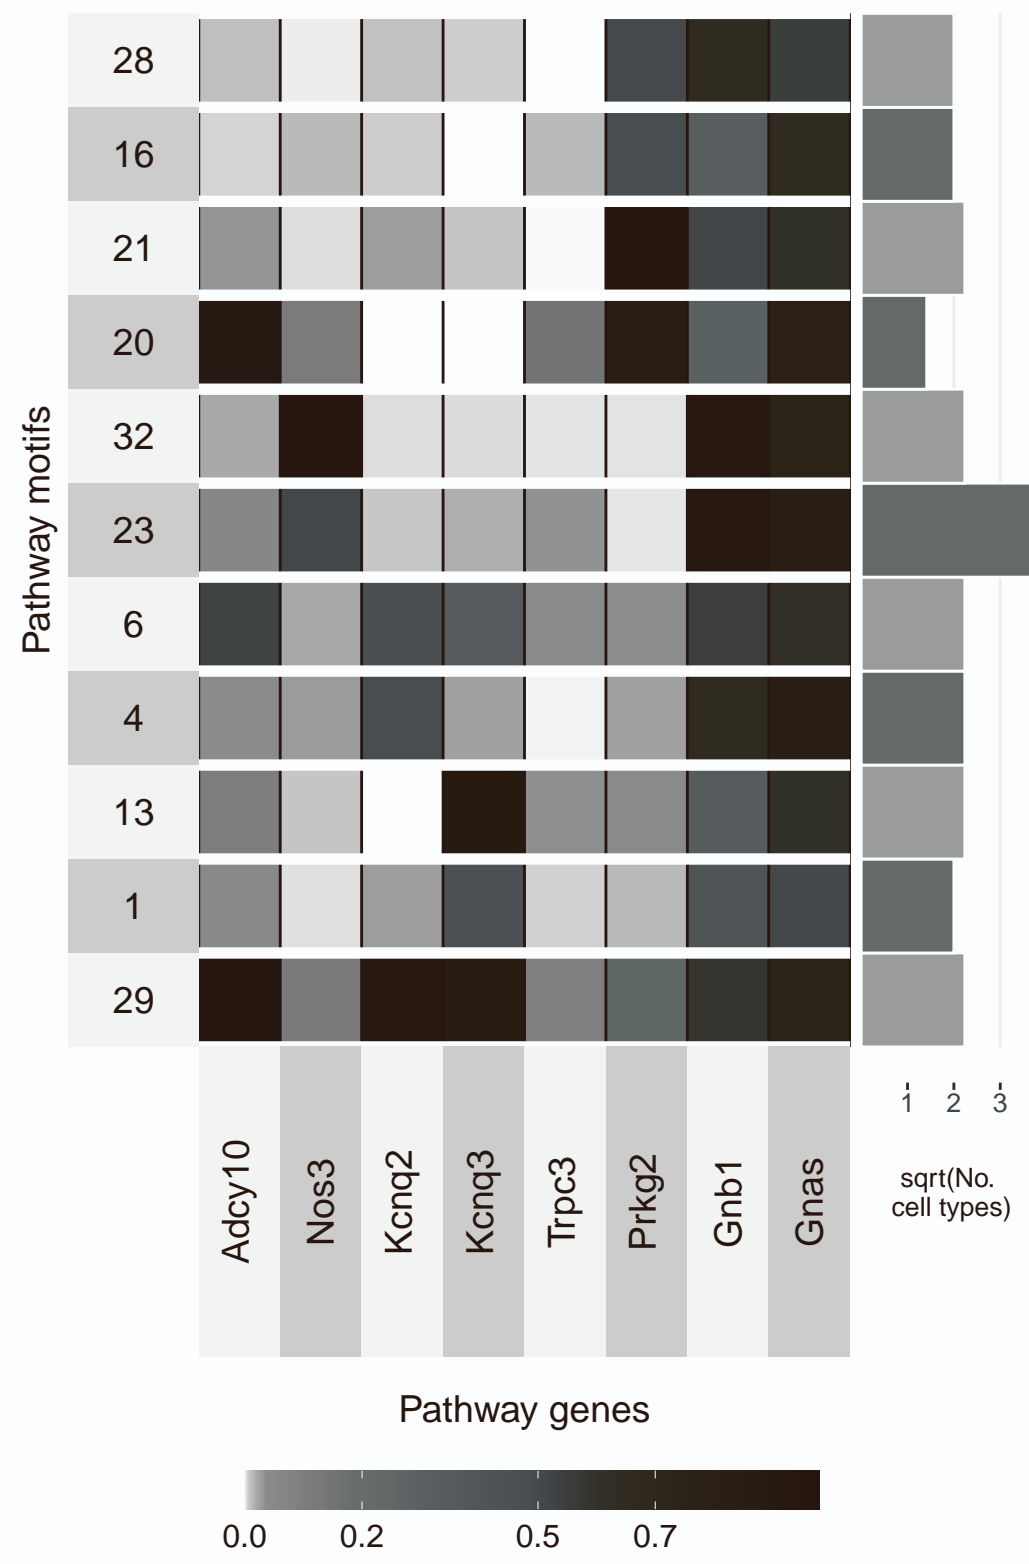

## Motif Tissue Composition

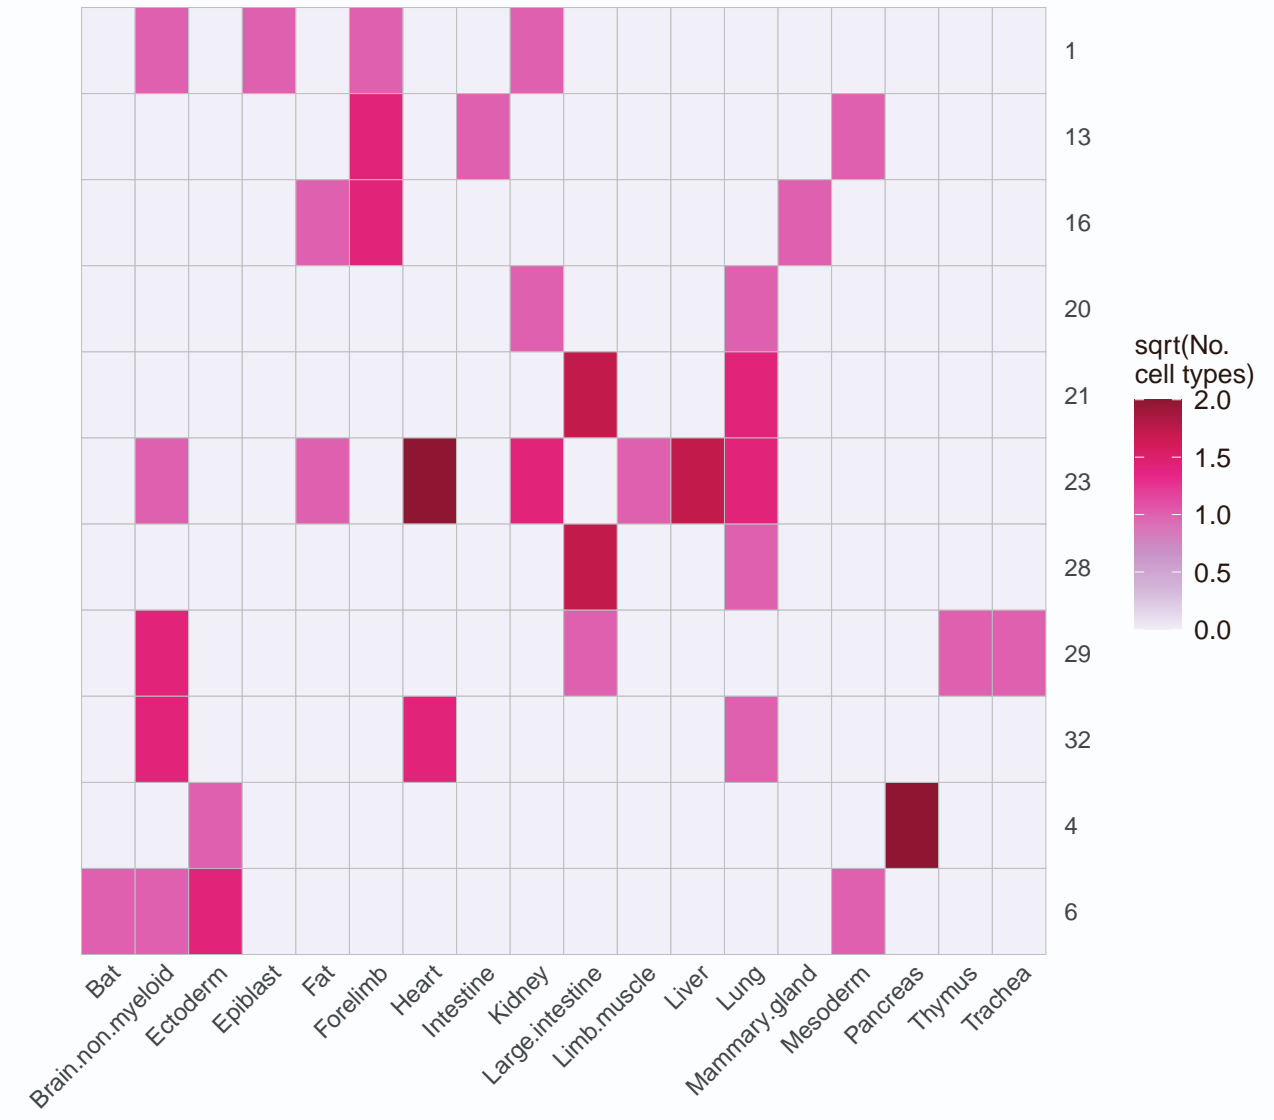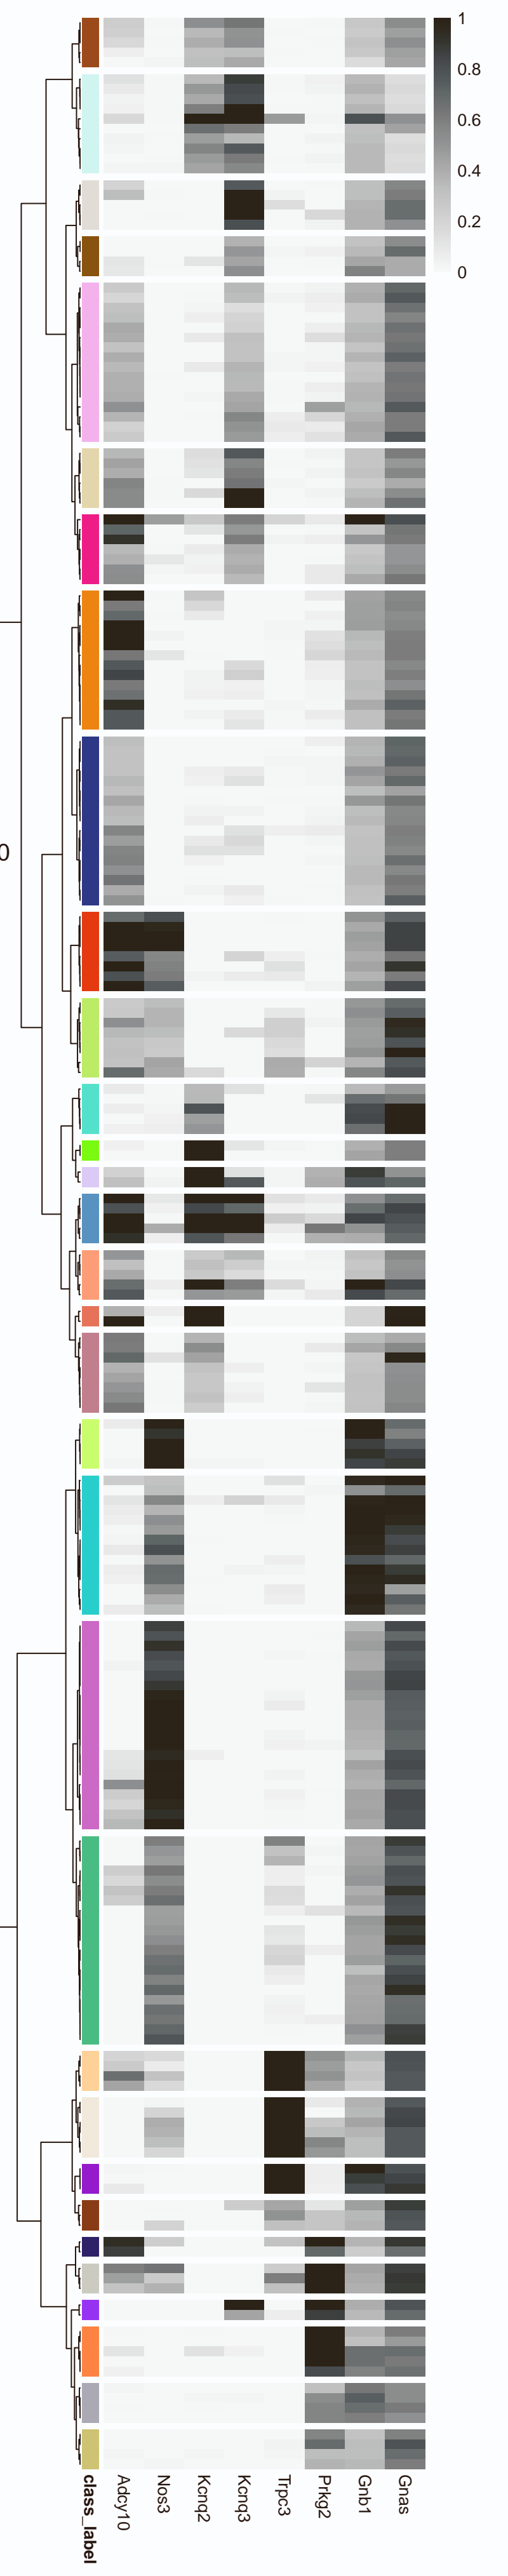

# ion Channels and Their Functional Role in Vascular Endothelium (k\_opt = 32)

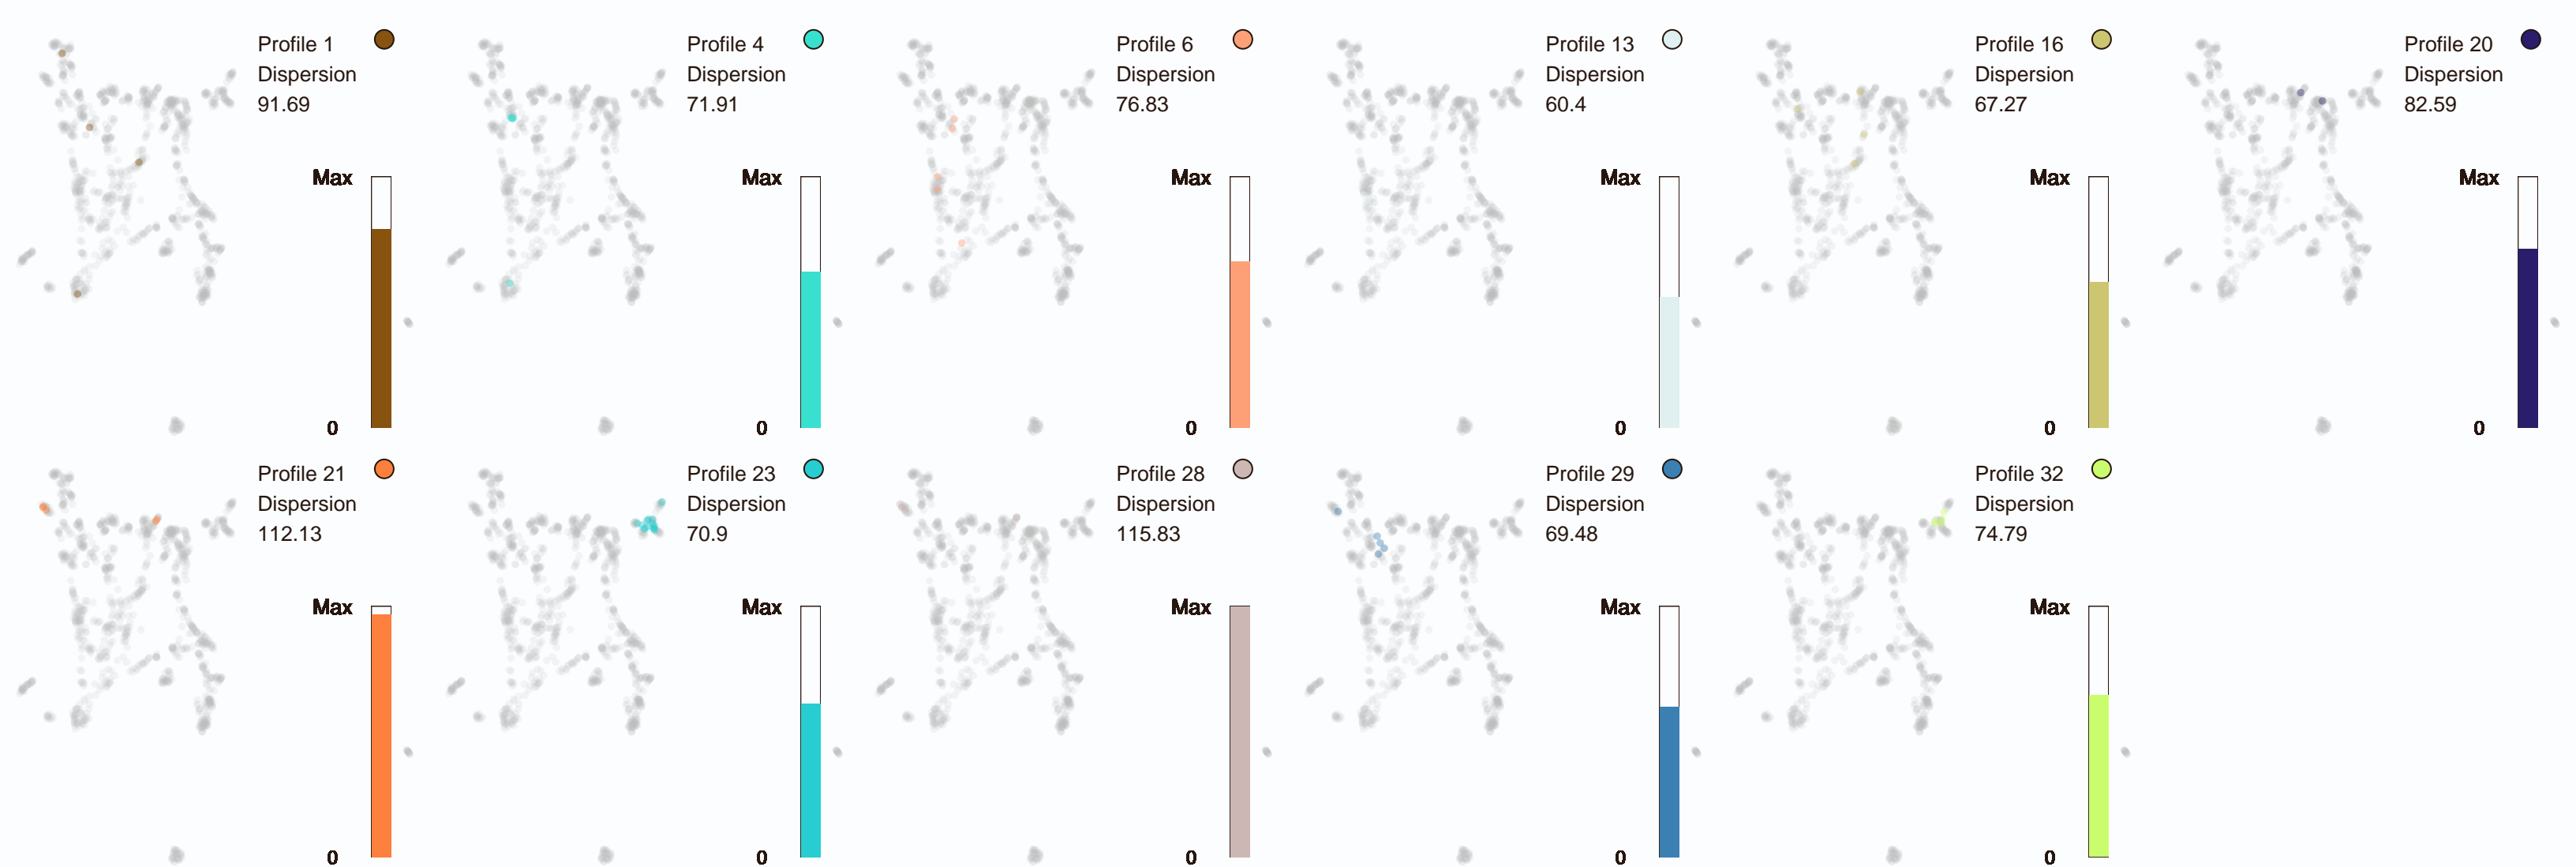

# Leucine Stimulation on Insulin Signaling (k\_opt = 34)

Irs1  
Irsr  
Irs2  
Mtor

Pathway genes  
Slc7a5  
Akt1  
Tsc2

Tsc1  
Rheb  
Rps6kb1  
Eif4e

## Gene Co-Expression Above Threshold

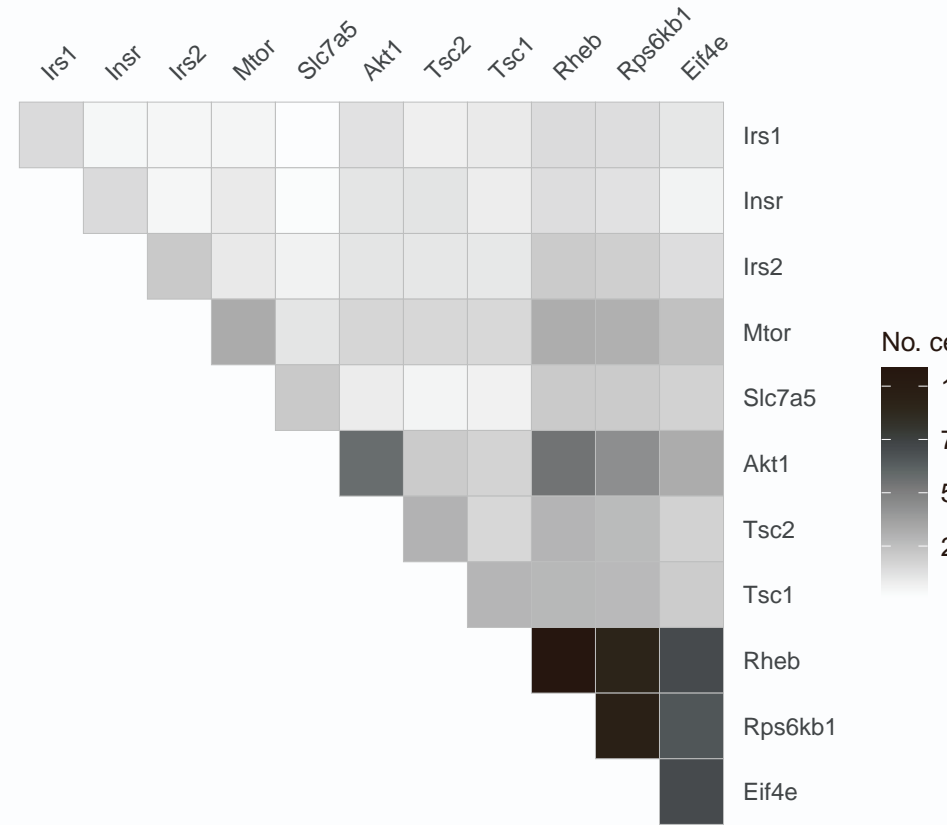

## Silhouette and Z-score

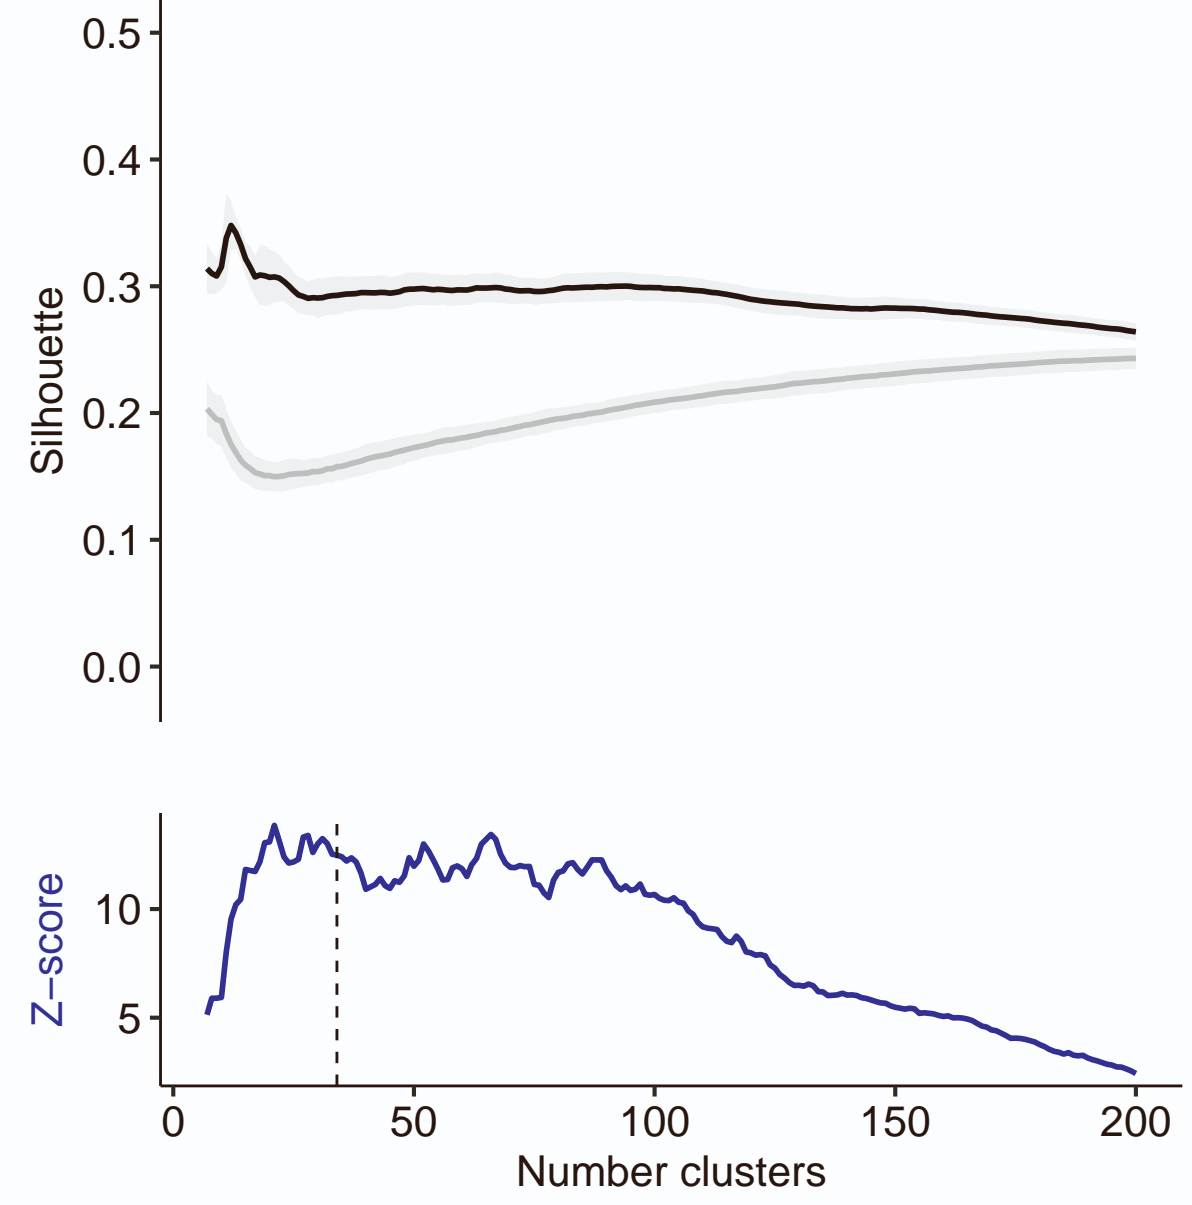

## Global UMAP: Pathway ON

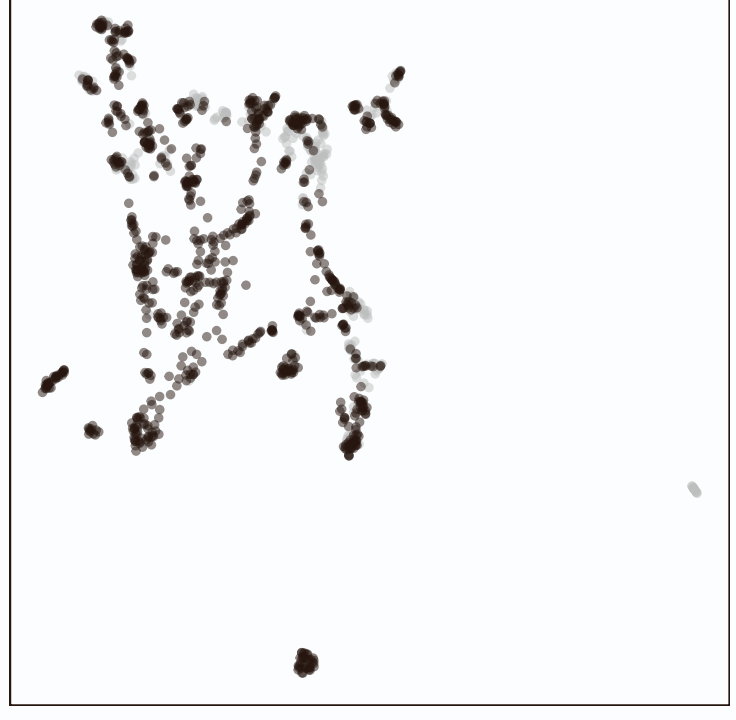

## ECDF of Profile Dispersions

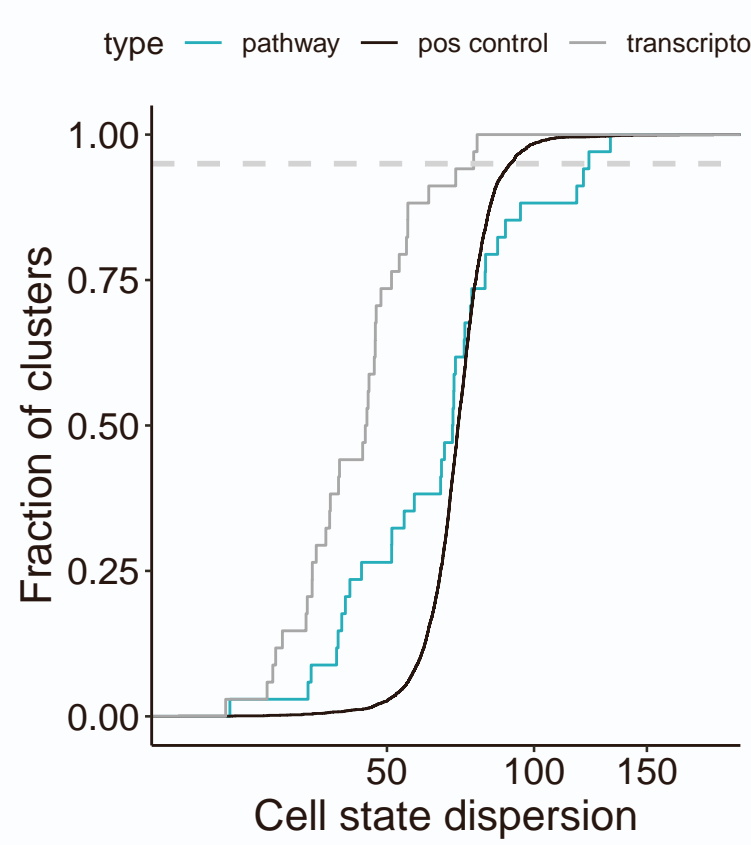

## Profile Dispersion Plot

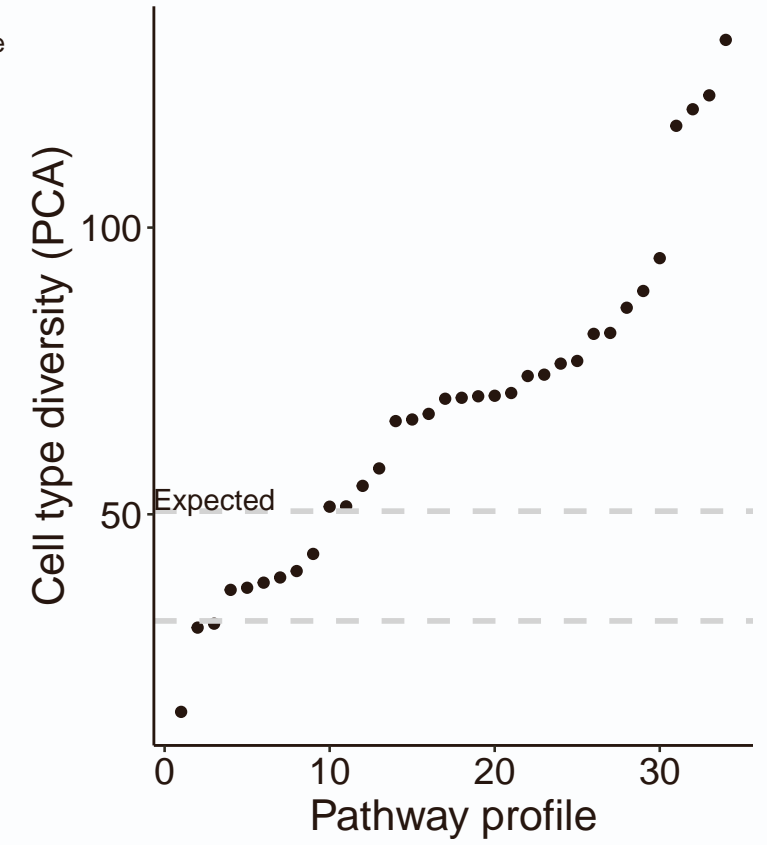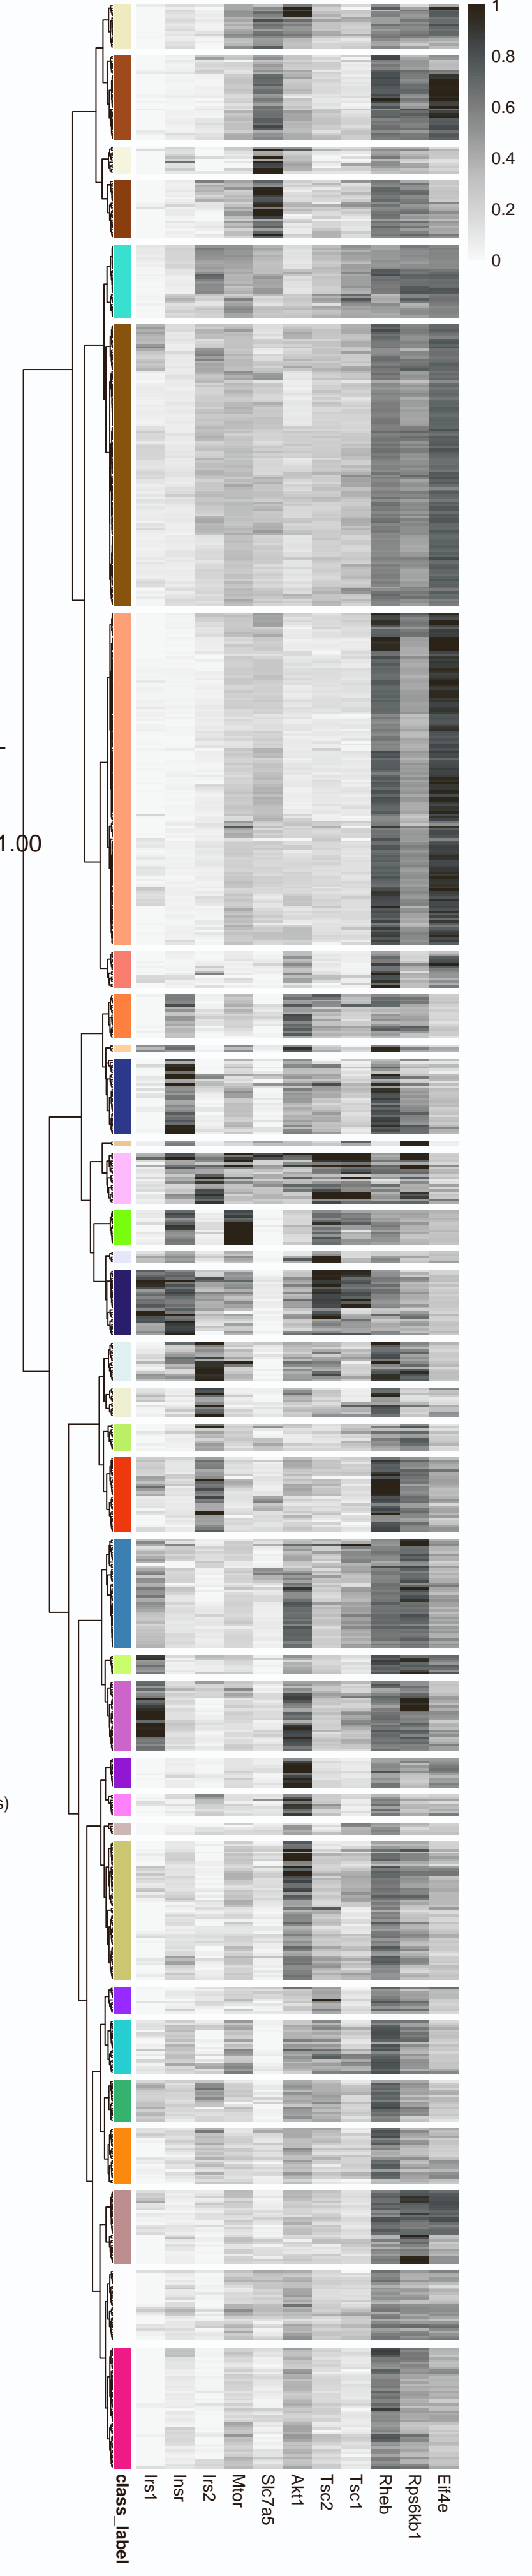

## Motifs, Dispersion $\geq 90^{\text{th}}$ percentile

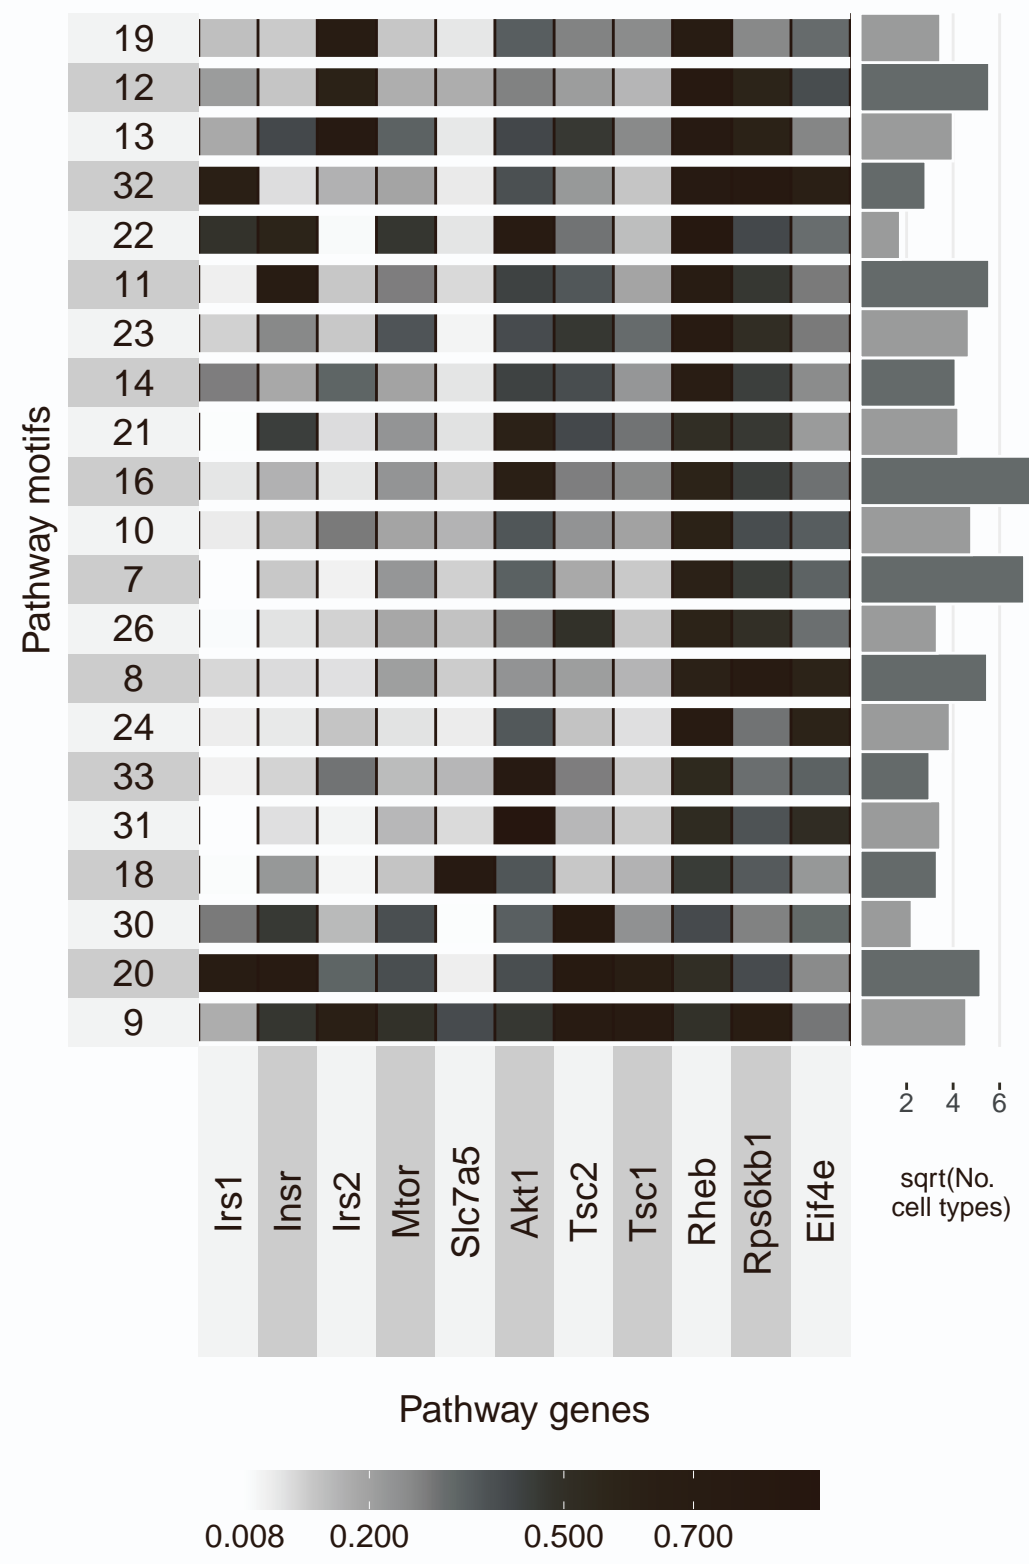

## Motif Tissue Composition

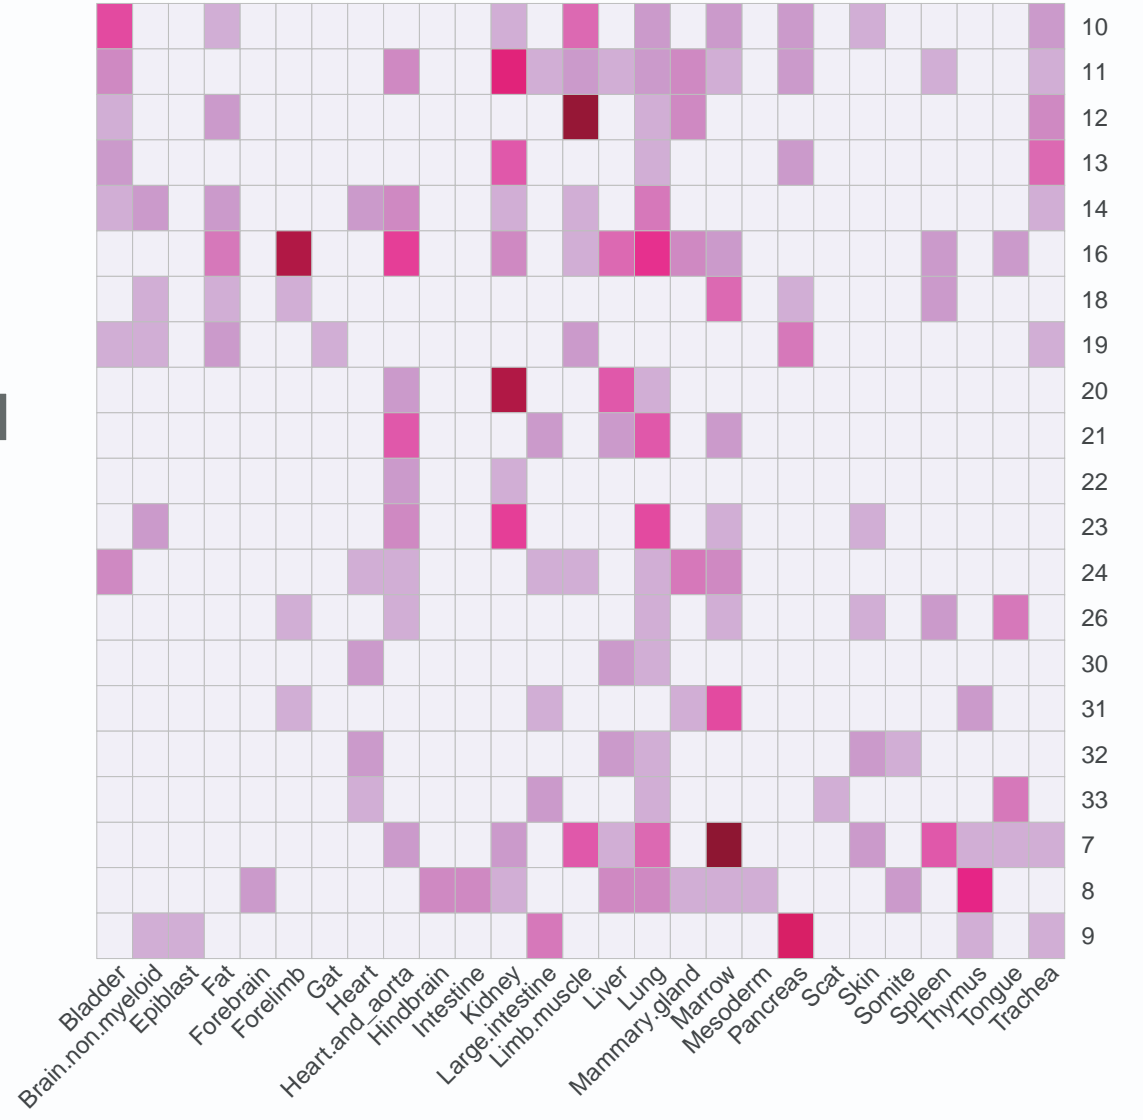

# Leucine Stimulation on Insulin Signaling (k\_opt = 34)

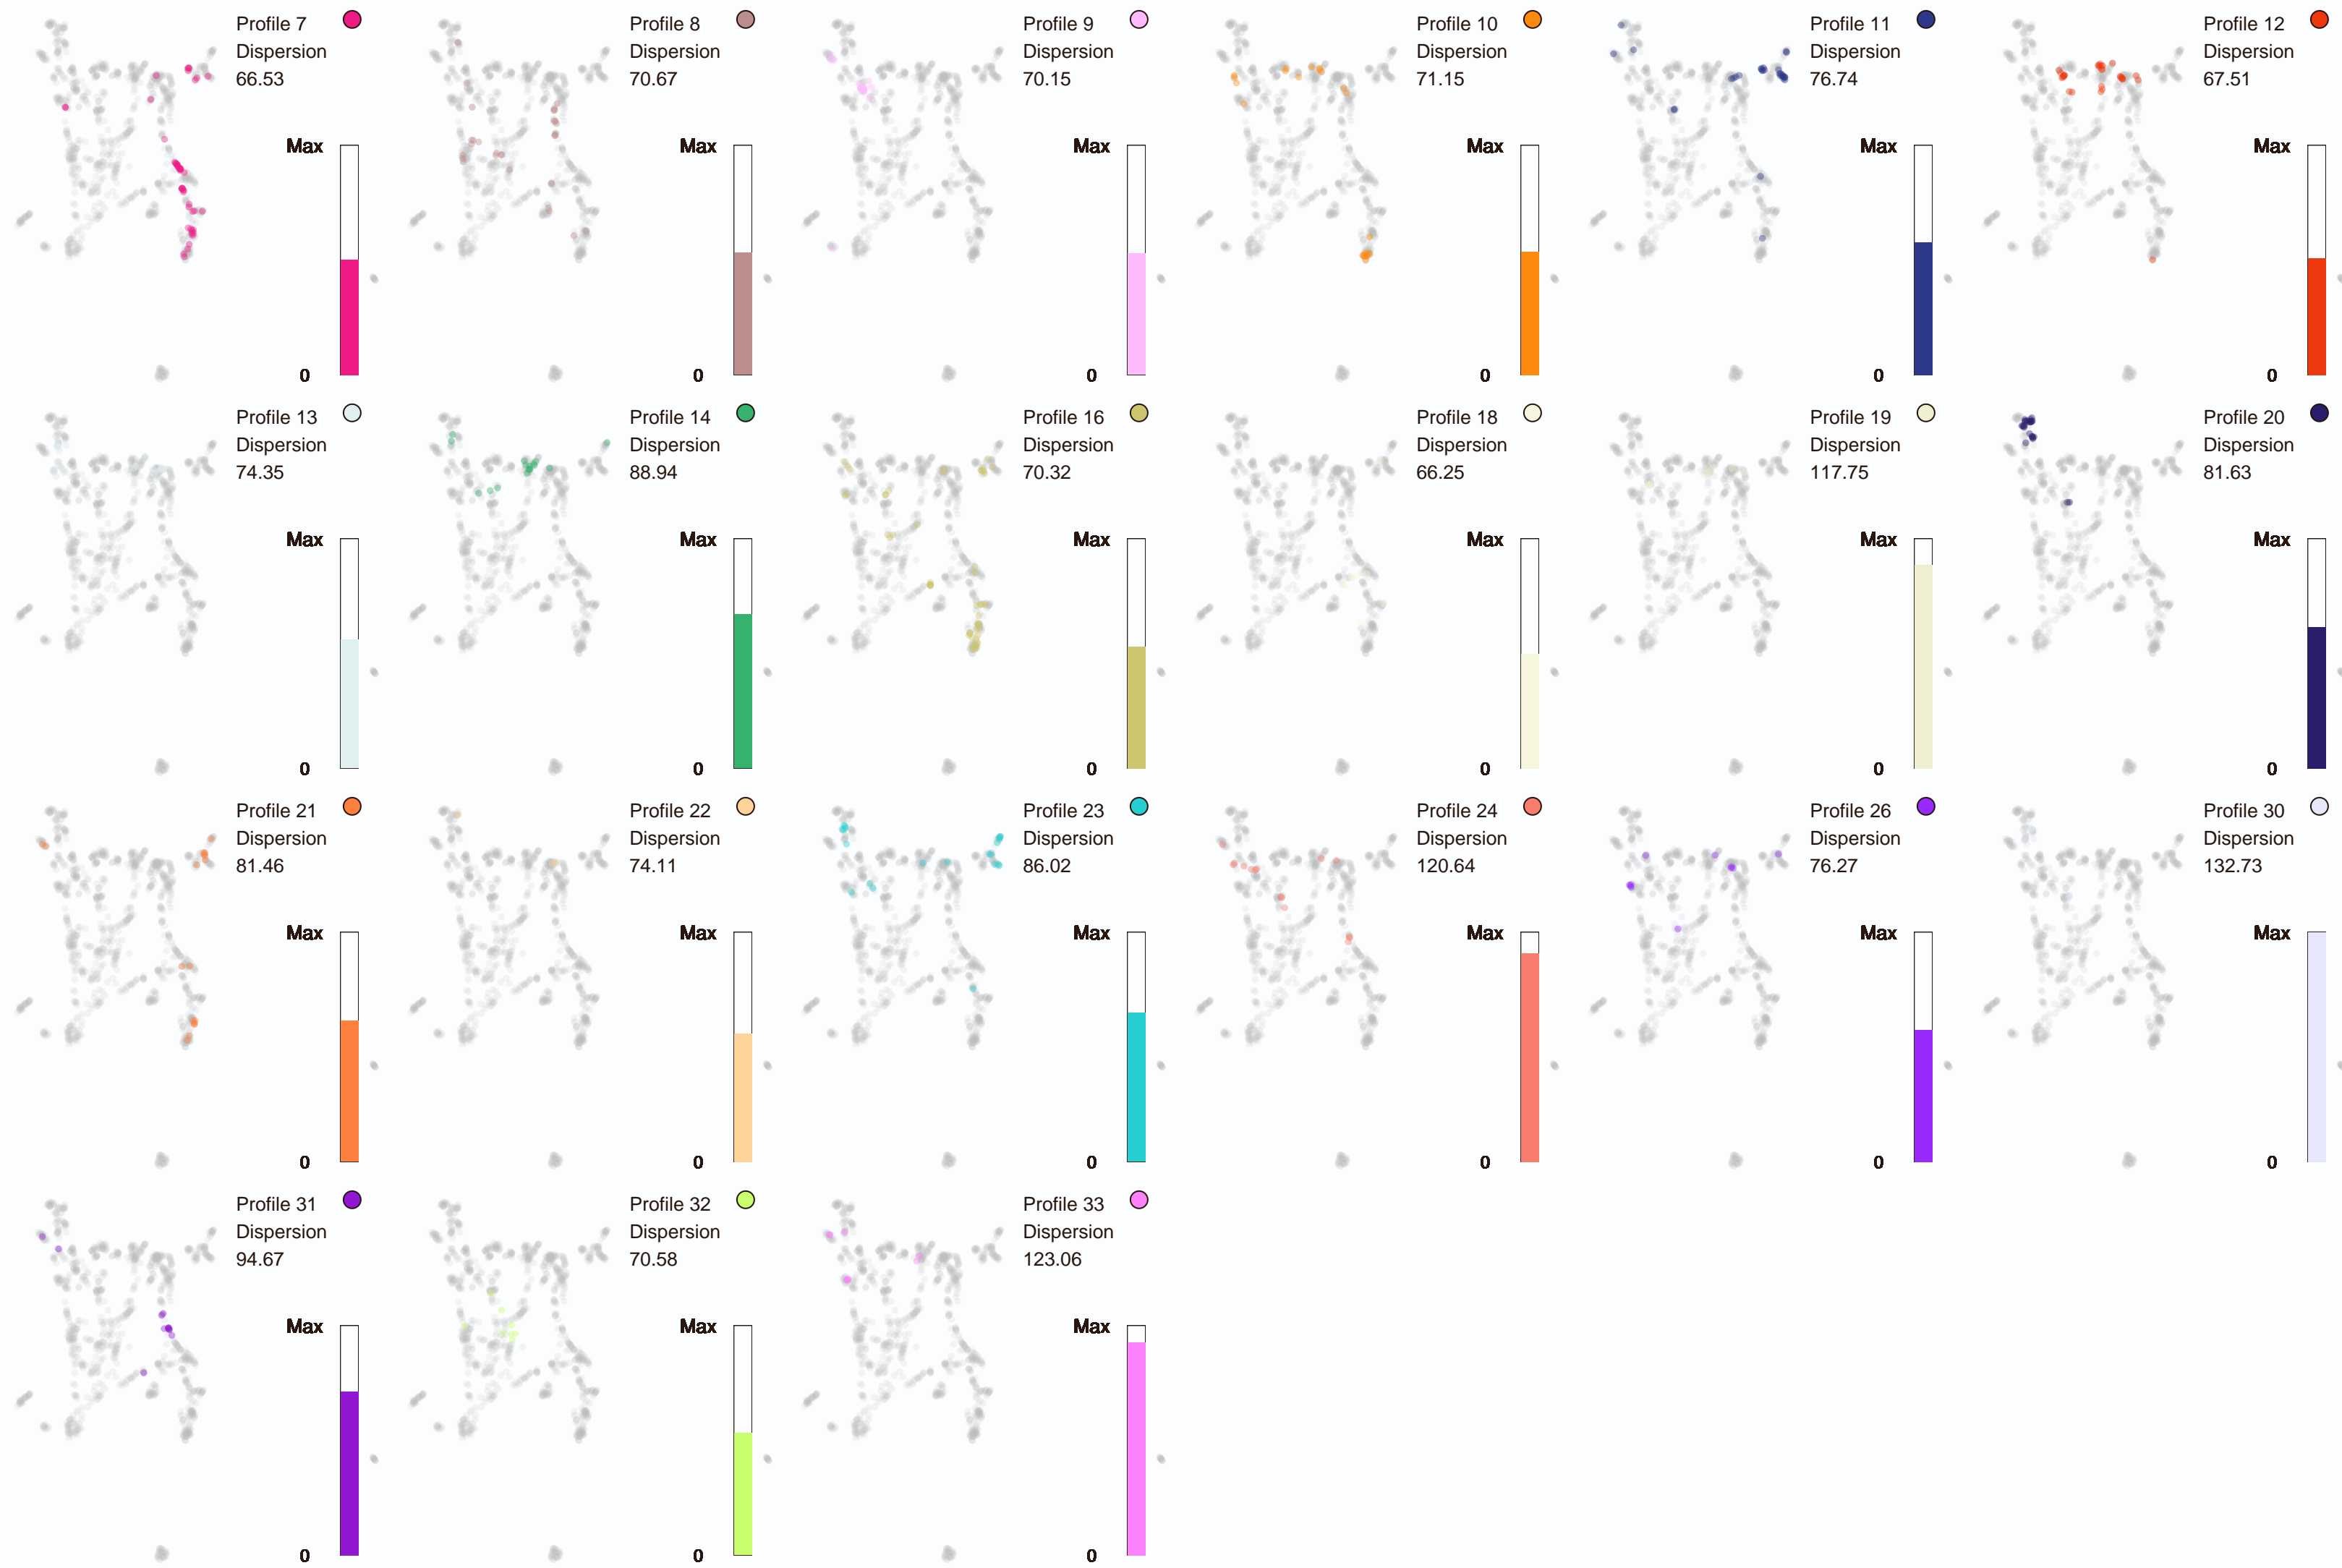





# LPS and Citrate Signaling and Inflammation (k\_opt = 112)

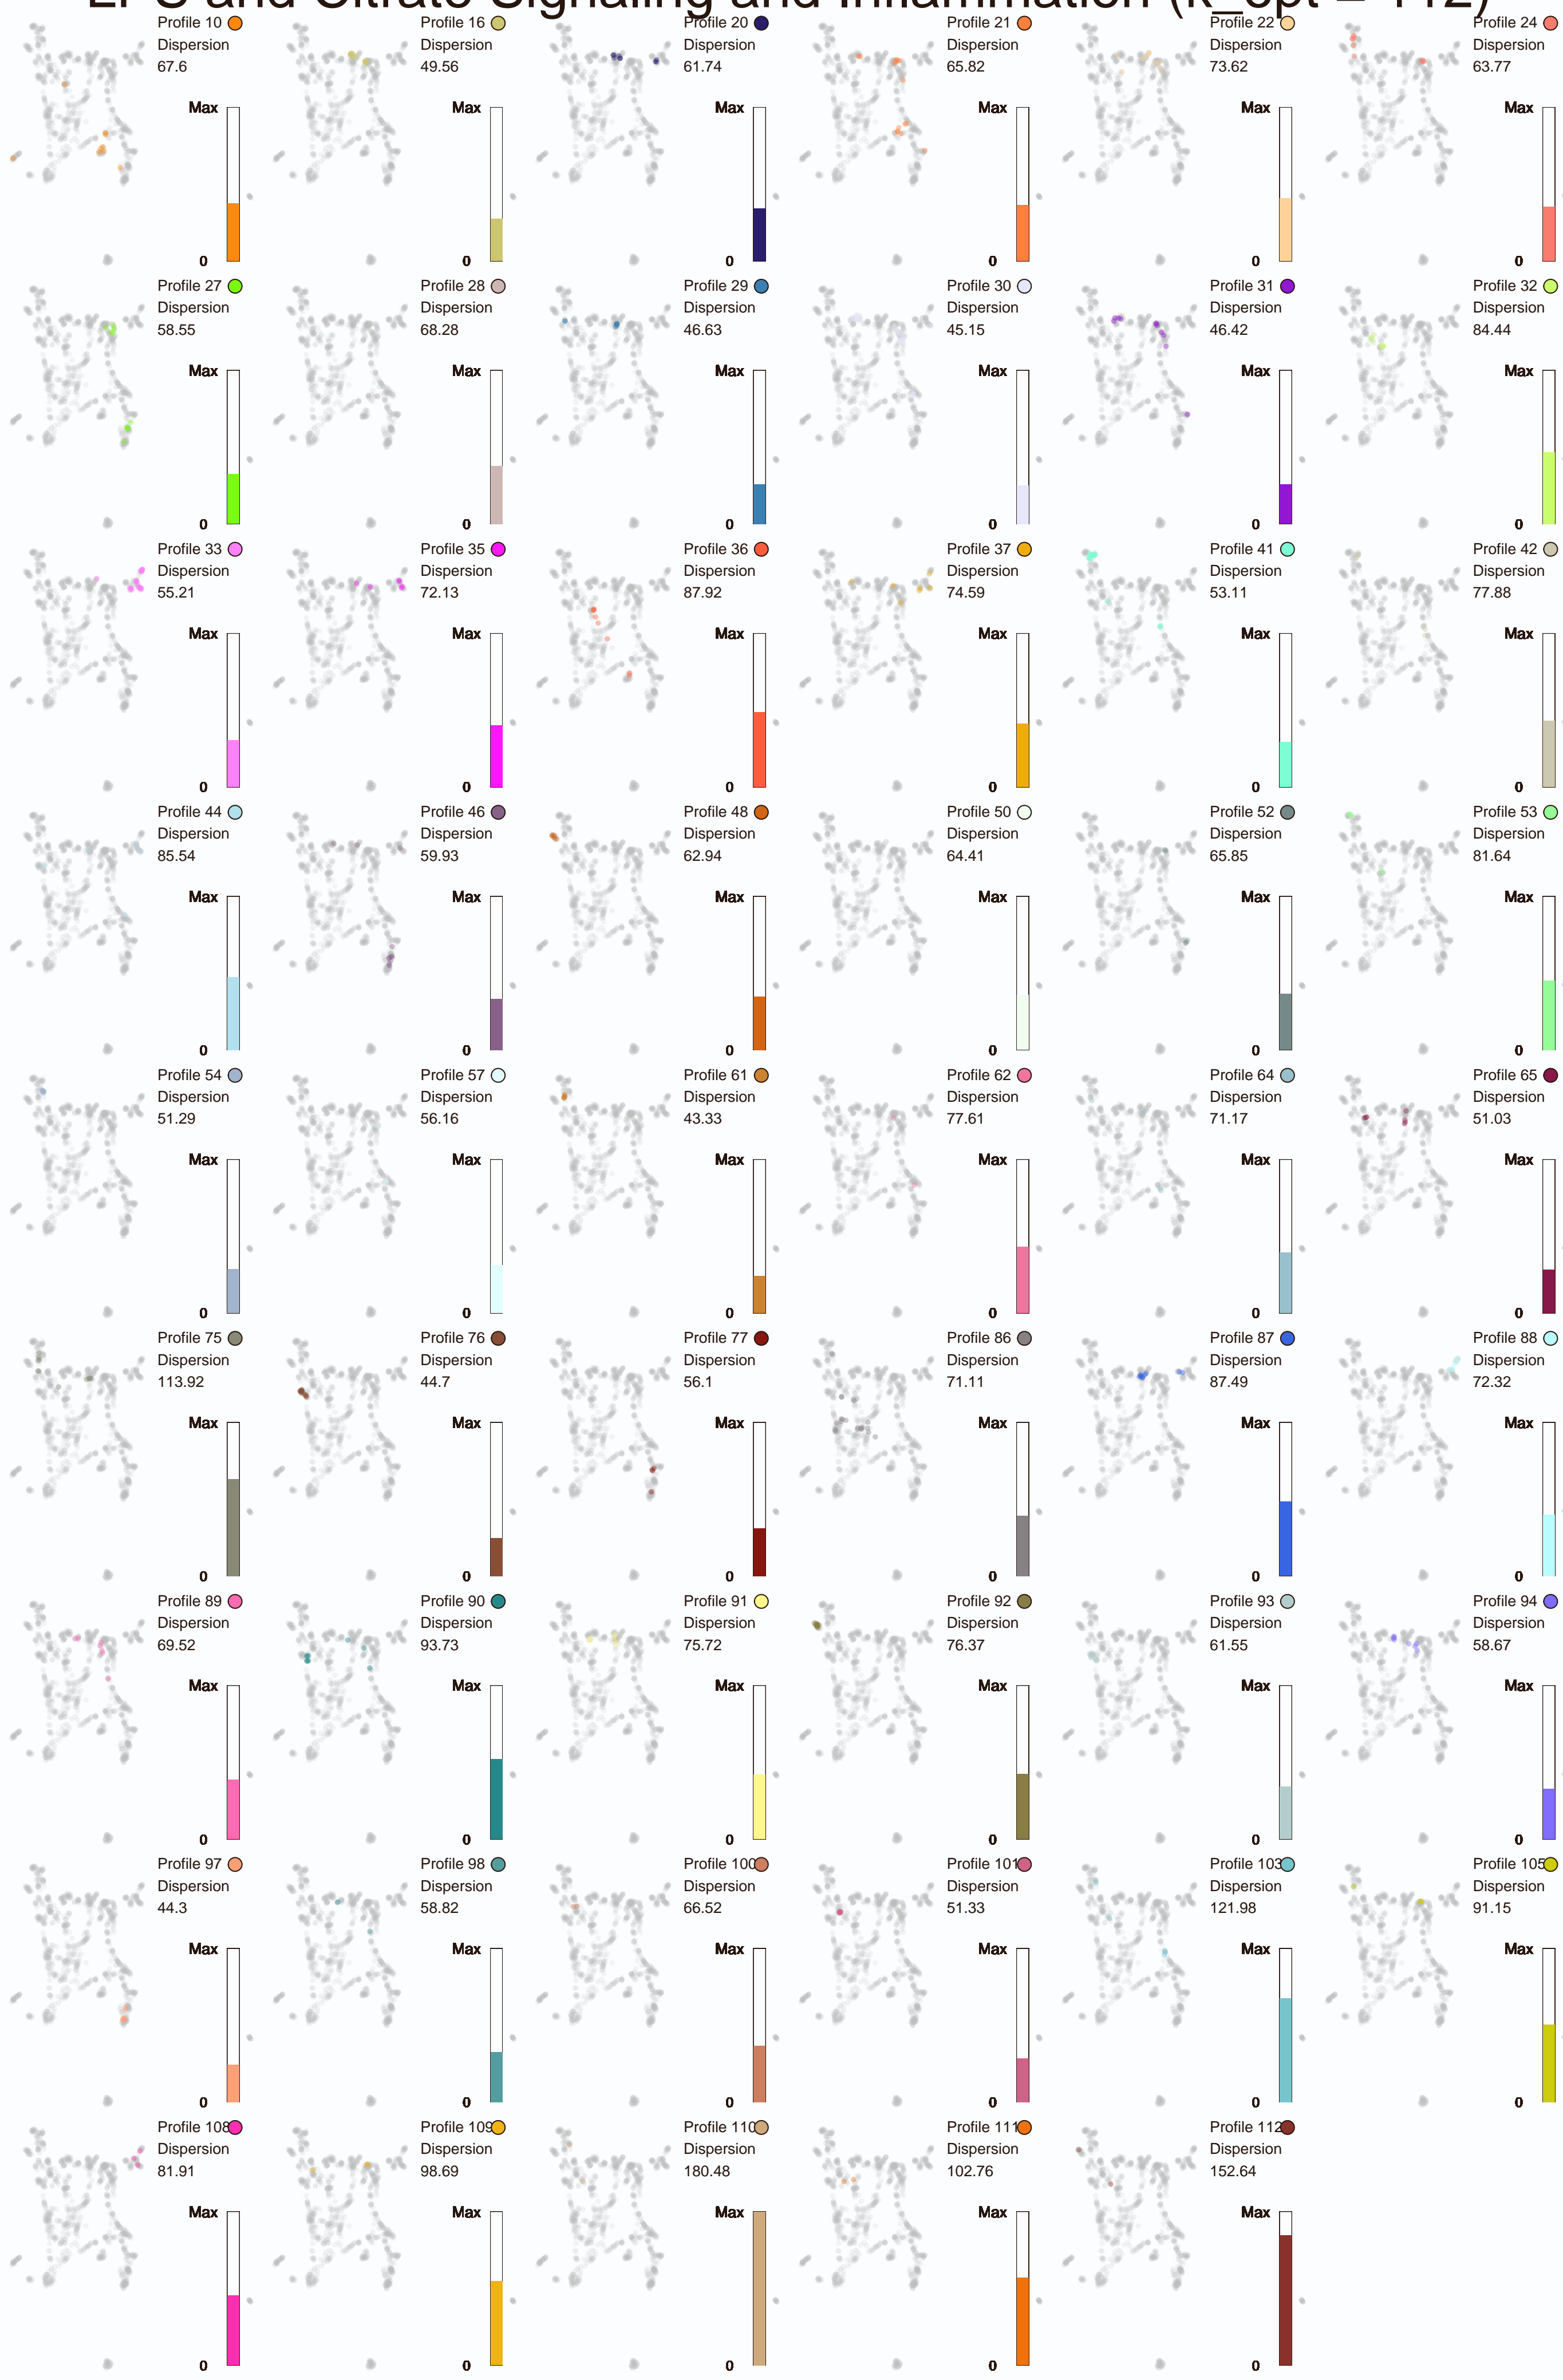

# Lysophosphatidic Acid LPA2 Signalling (k\_opt = 31)

Adcy1  
Plcb1  
Gnb1

Pathway genes  
Gng2  
Lpar2  
Itp1

Akt1  
Srf  
Rock1

## Gene Co-Expression Above Threshold

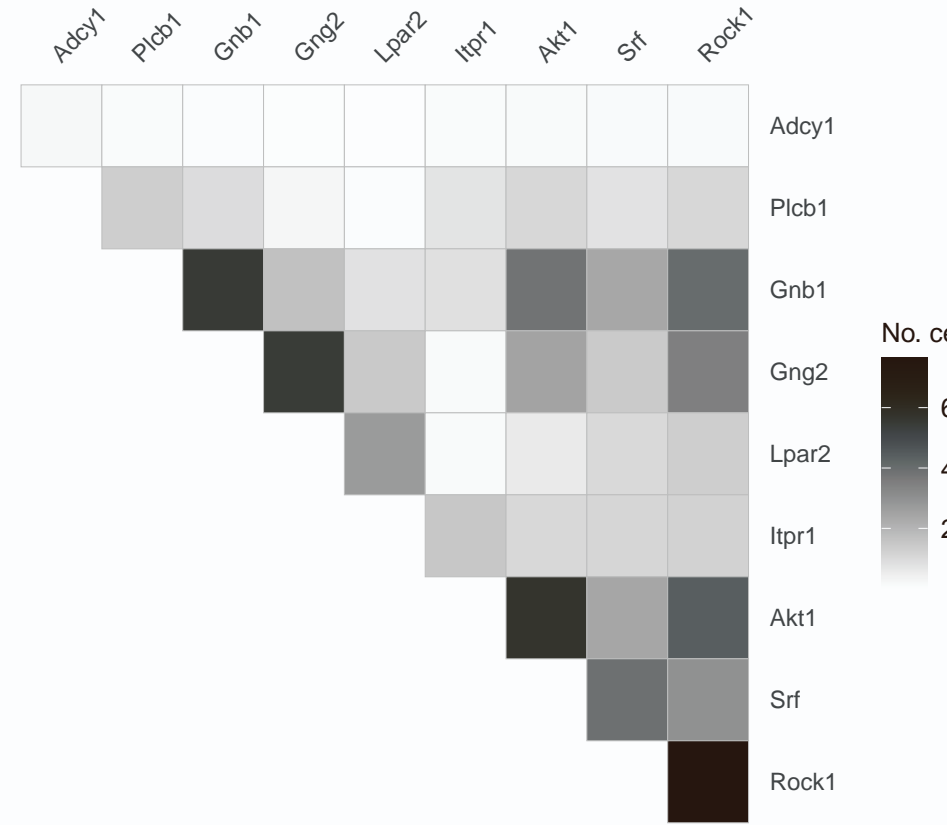

## Silhouette and Z-score

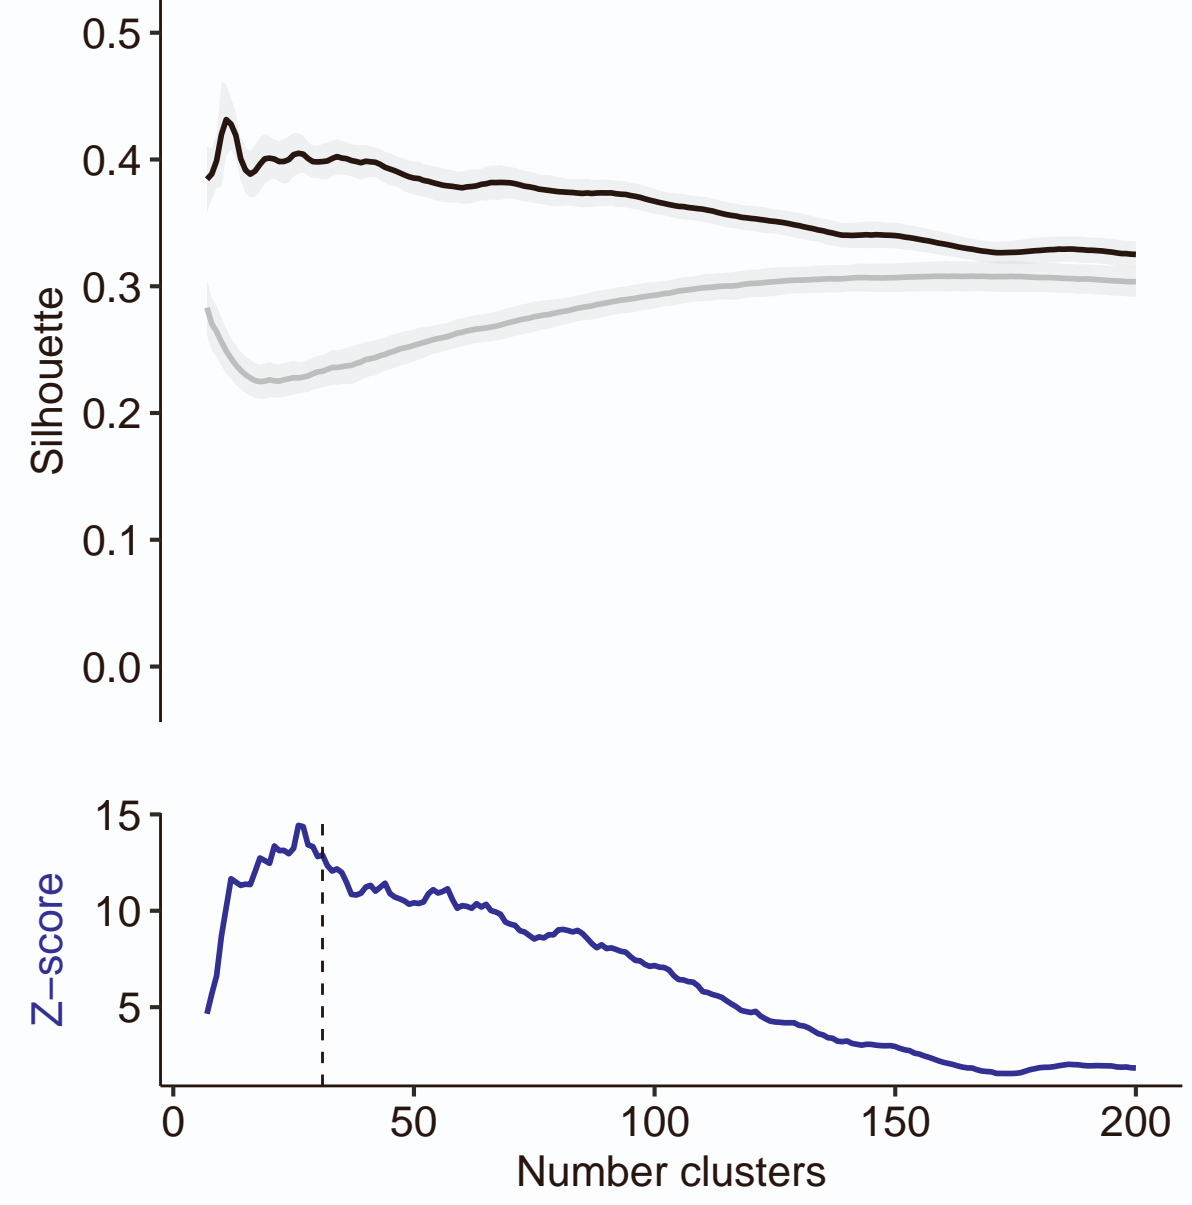

## Global UMAP: Pathway ON

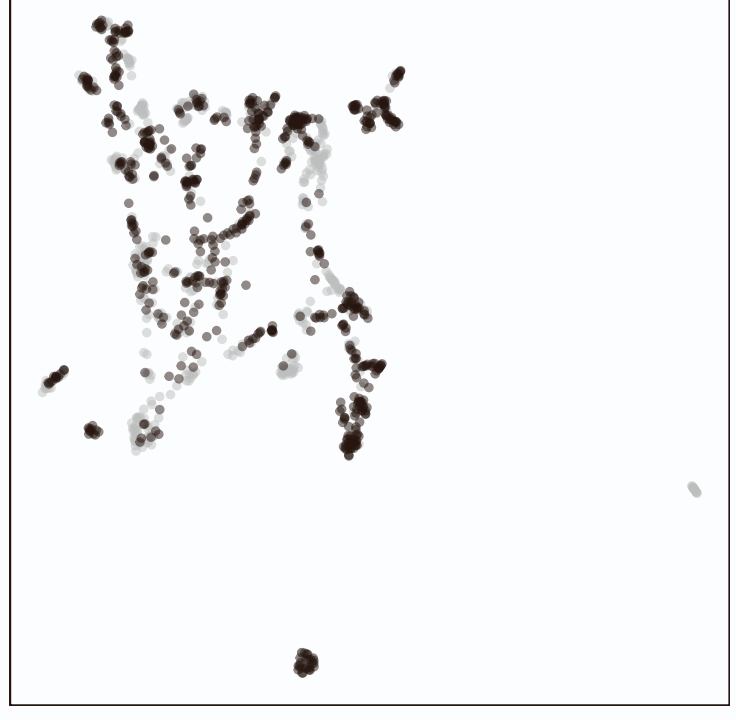

## ECDF of Profile Dispersions

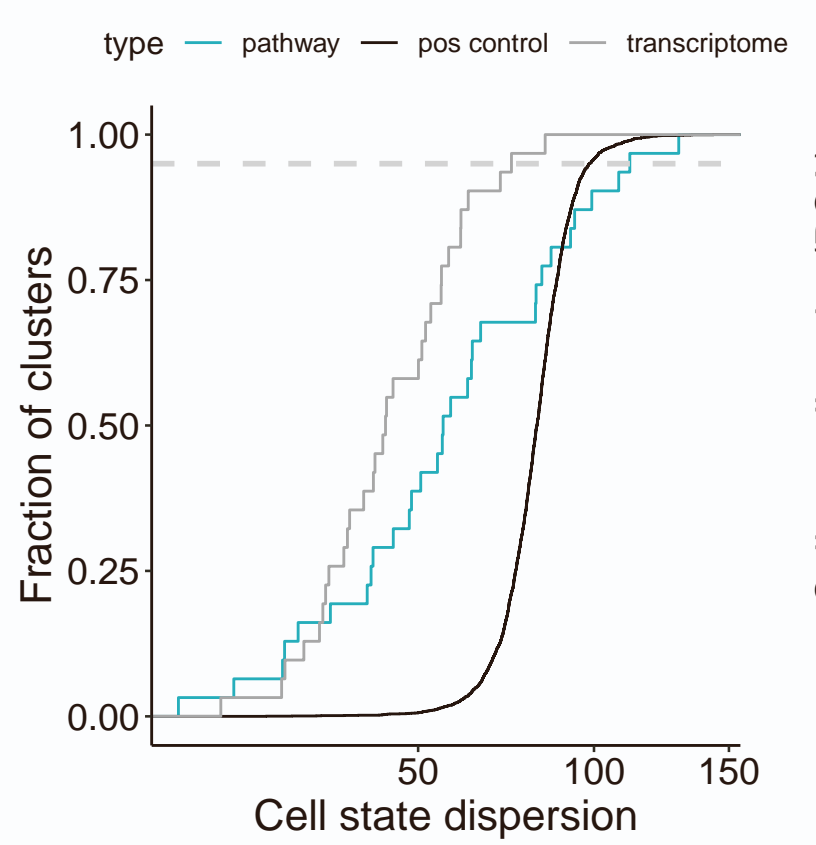

## Profile Dispersion Plot

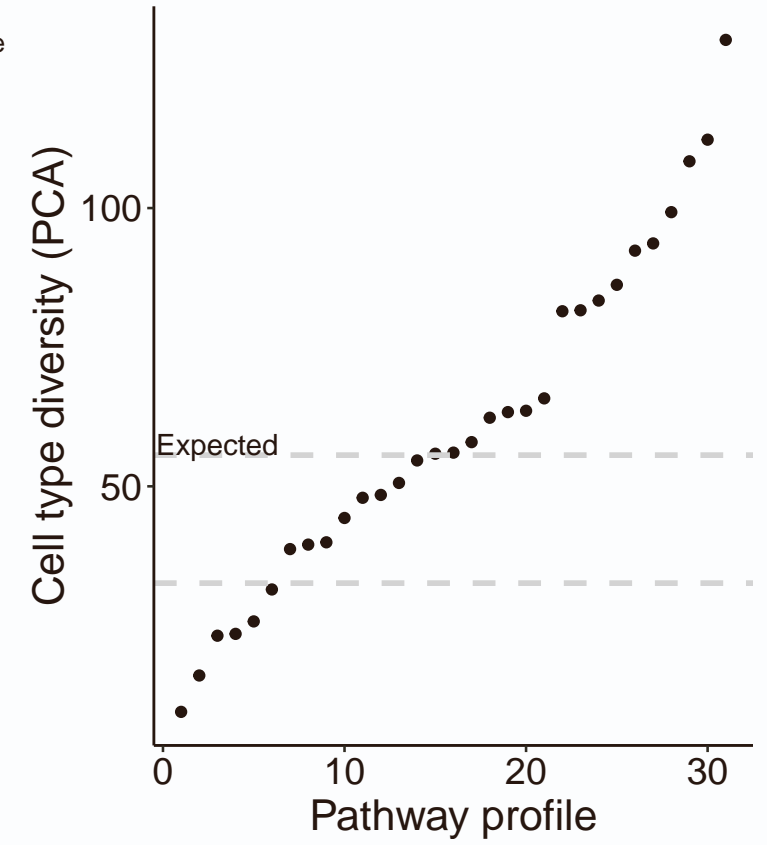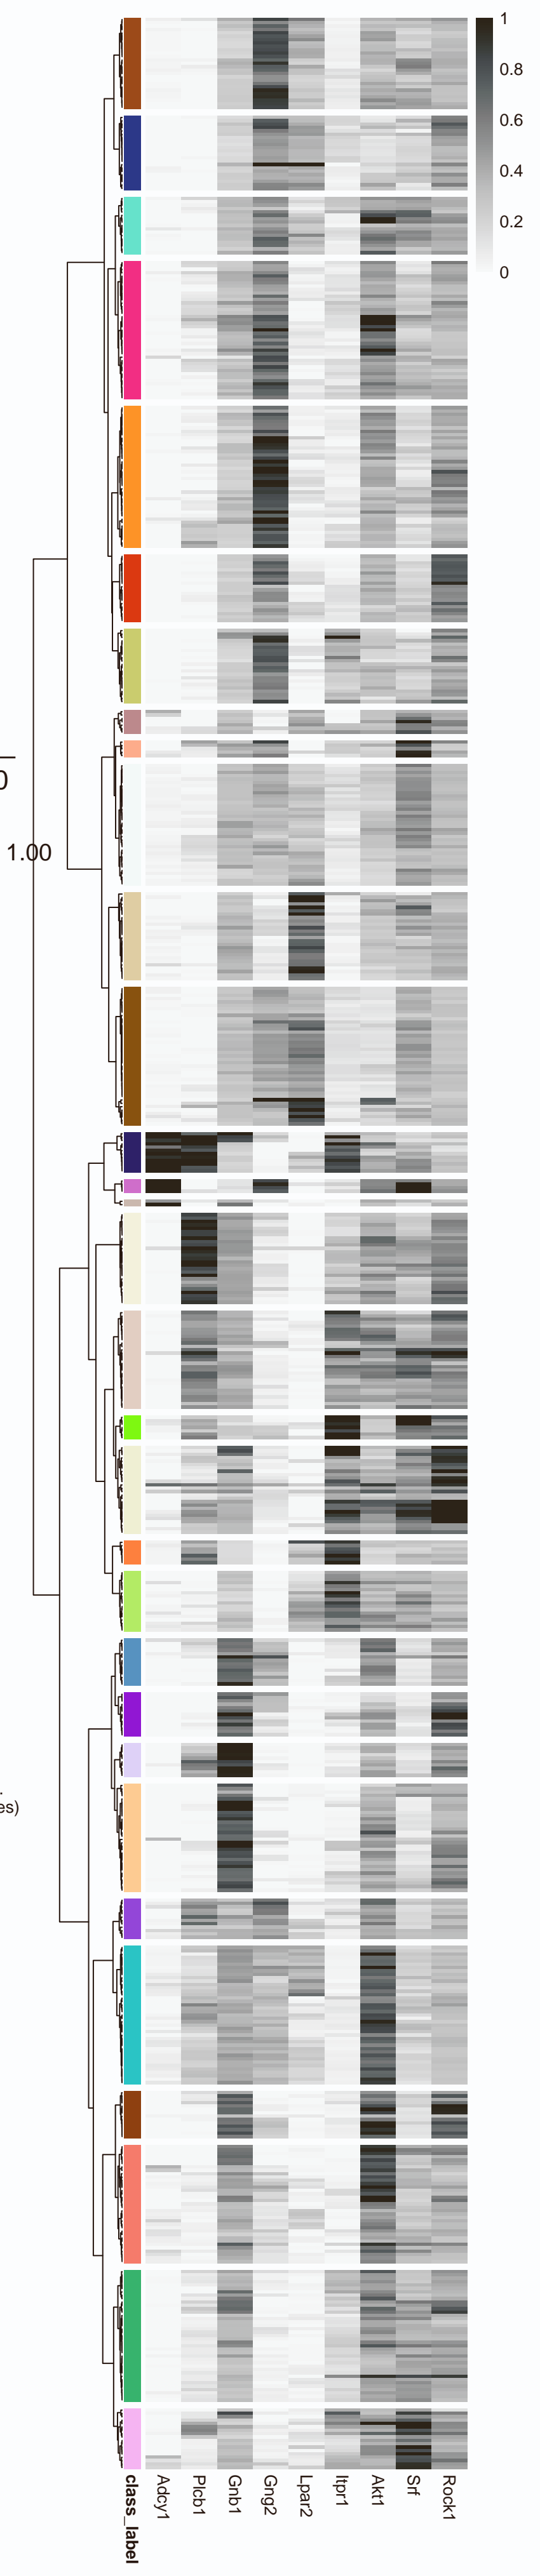

## Motifs, Dispersion $\geq 90^{\text{th}}$ percentile

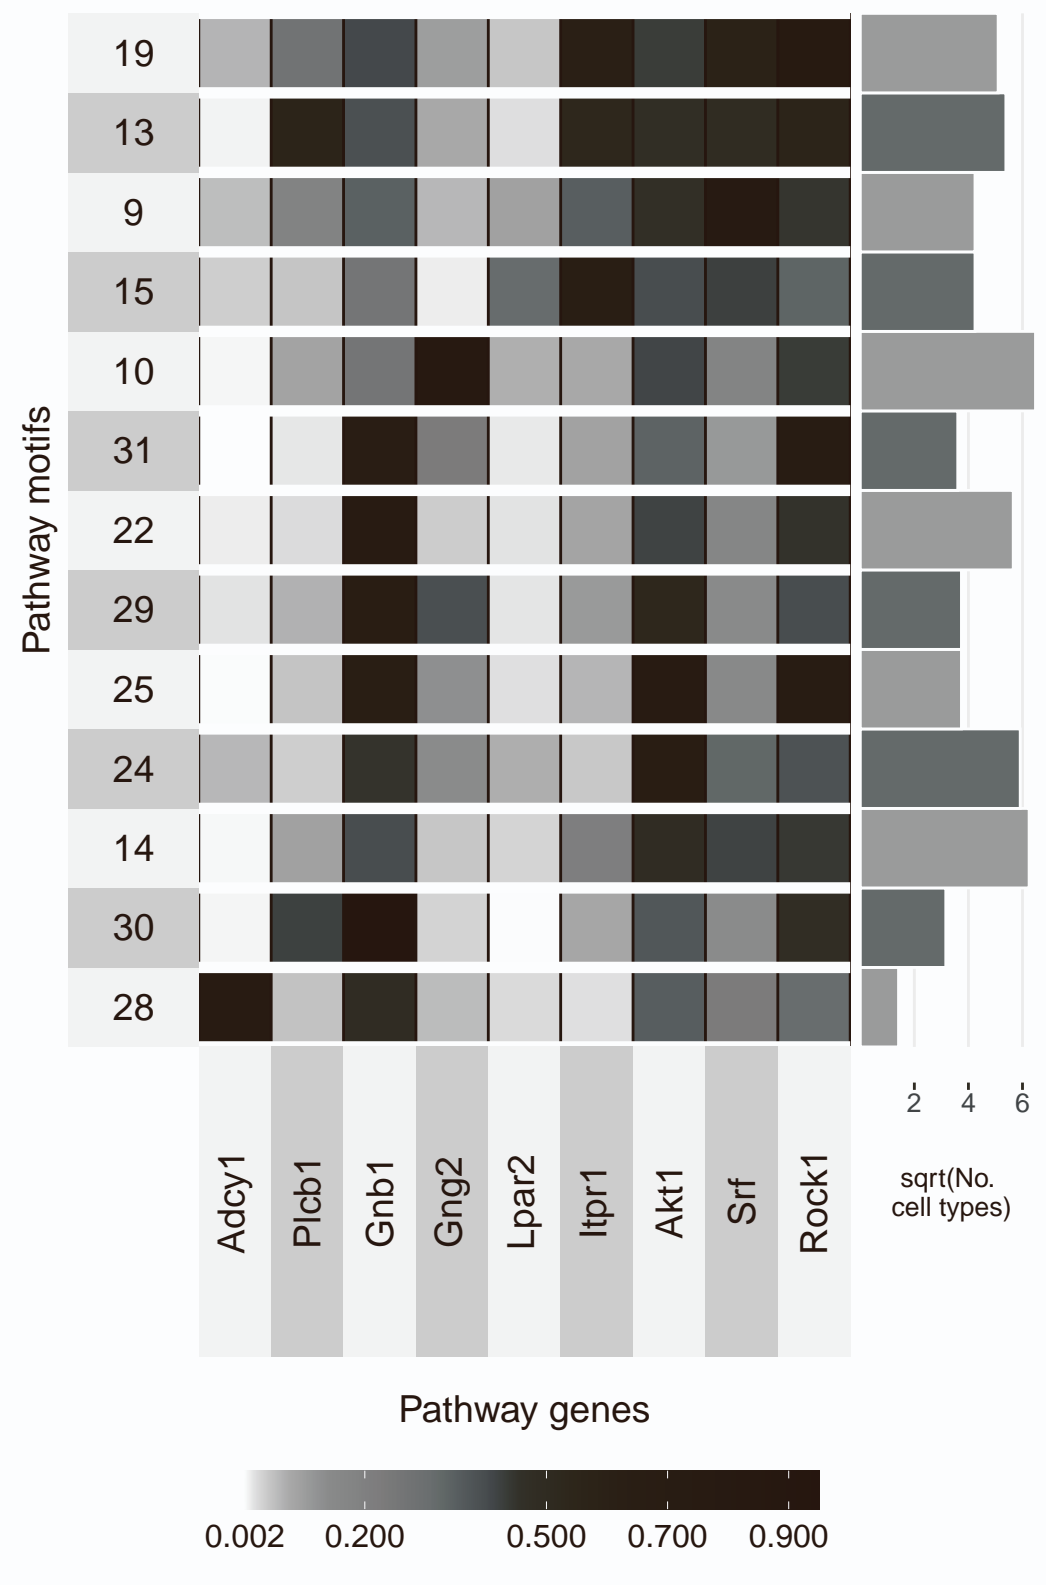

## Motif Tissue Composition

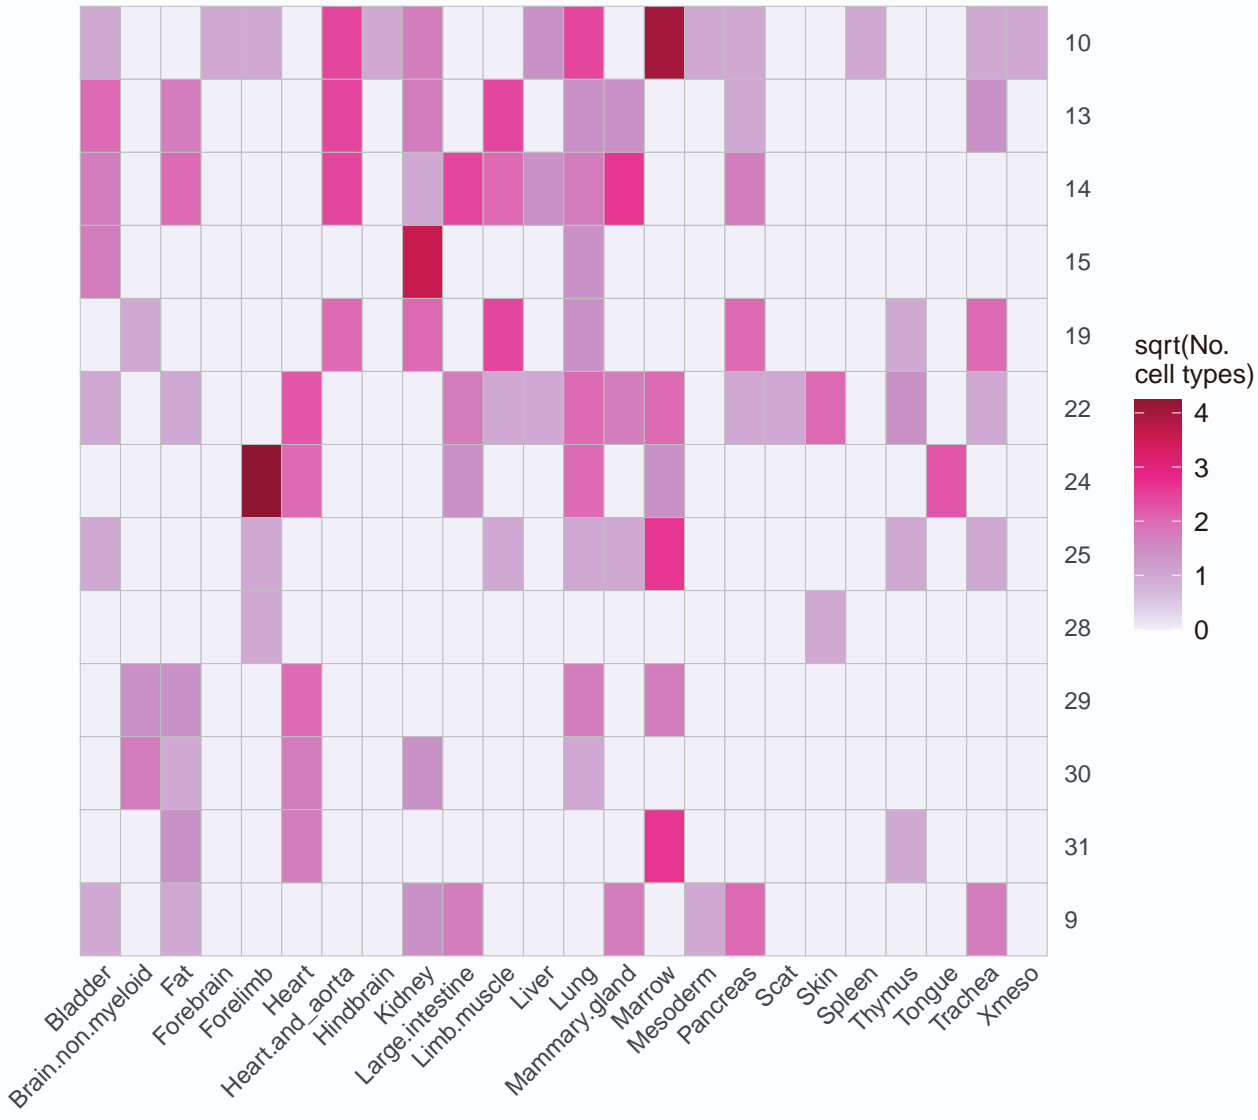

Pathway genes

Adcy1 Plcb1 Gnb1 Gng2 Lpar2 Itp1 Akt1 Srf Rock1

0.002 0.200 0.500 0.700 0.900

# Lysophosphatidic Acid LPA2 Signalling (k\_opt = 31)

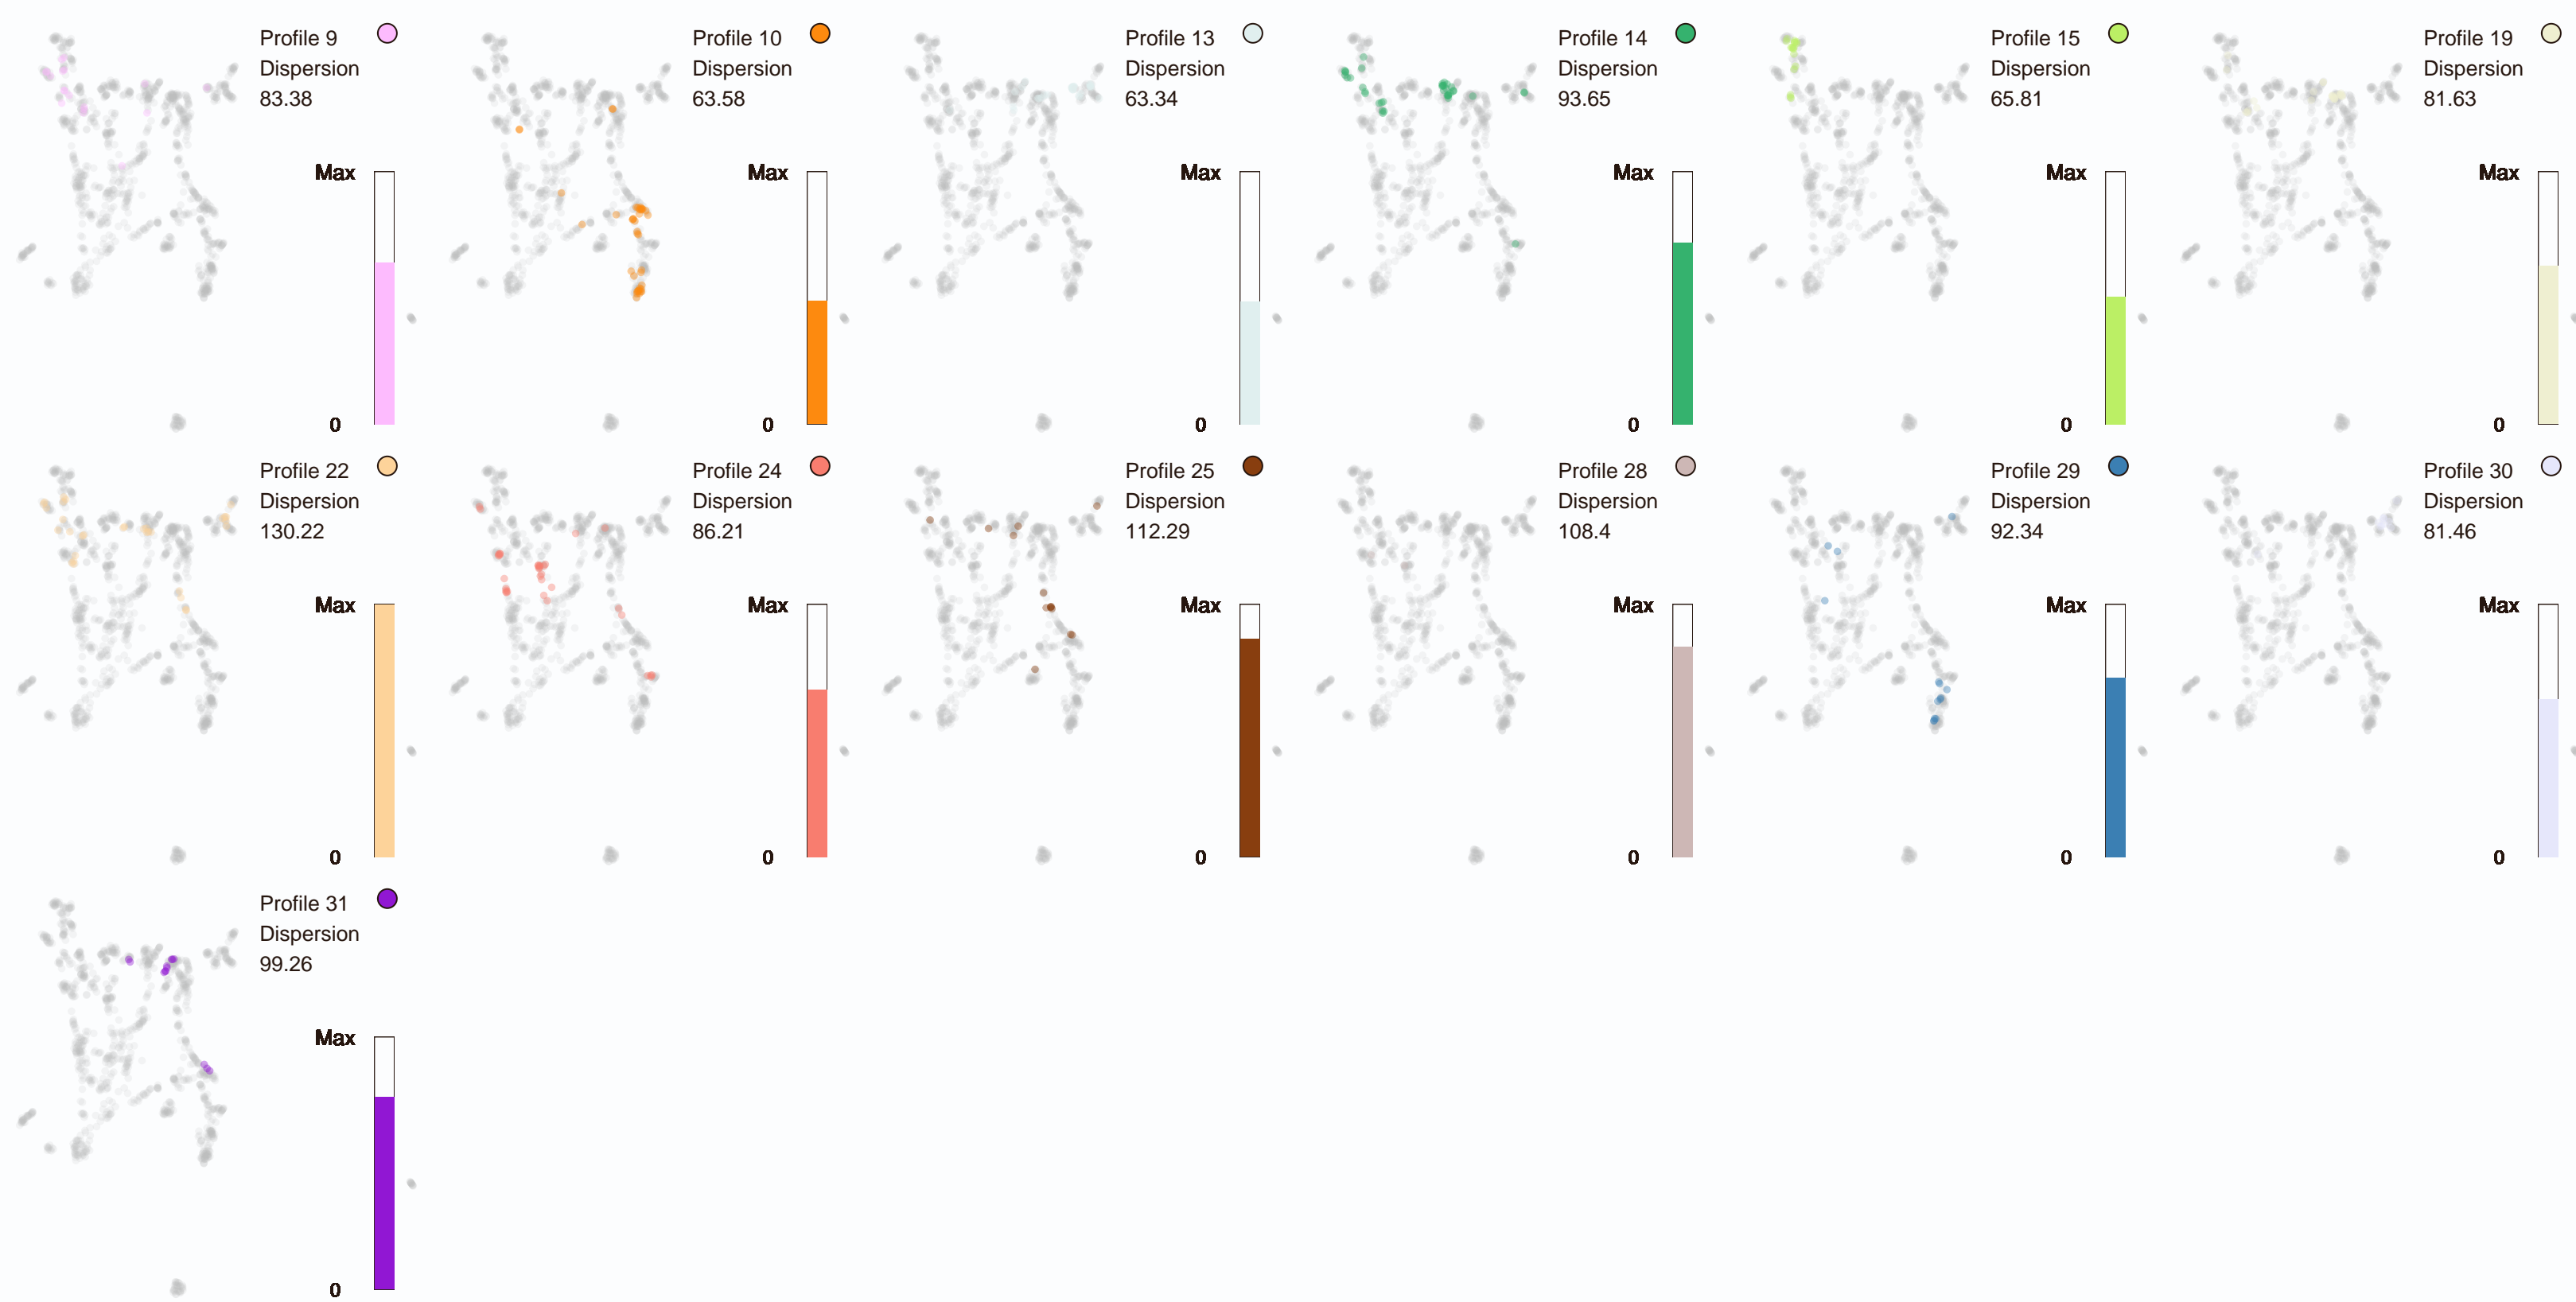

# Mitochondrial Electron Transport Chain (k\_opt = 43)

Gpd2  
 Sdha  
 Sdhb  
 Sdhc  
 Sdhd  
 Gpd1  
 Gapdh  
 Cyts  
 Uqcrc1  
 Slc25a4  
 Slc37a2

## Gene Co-Expression Above Threshold

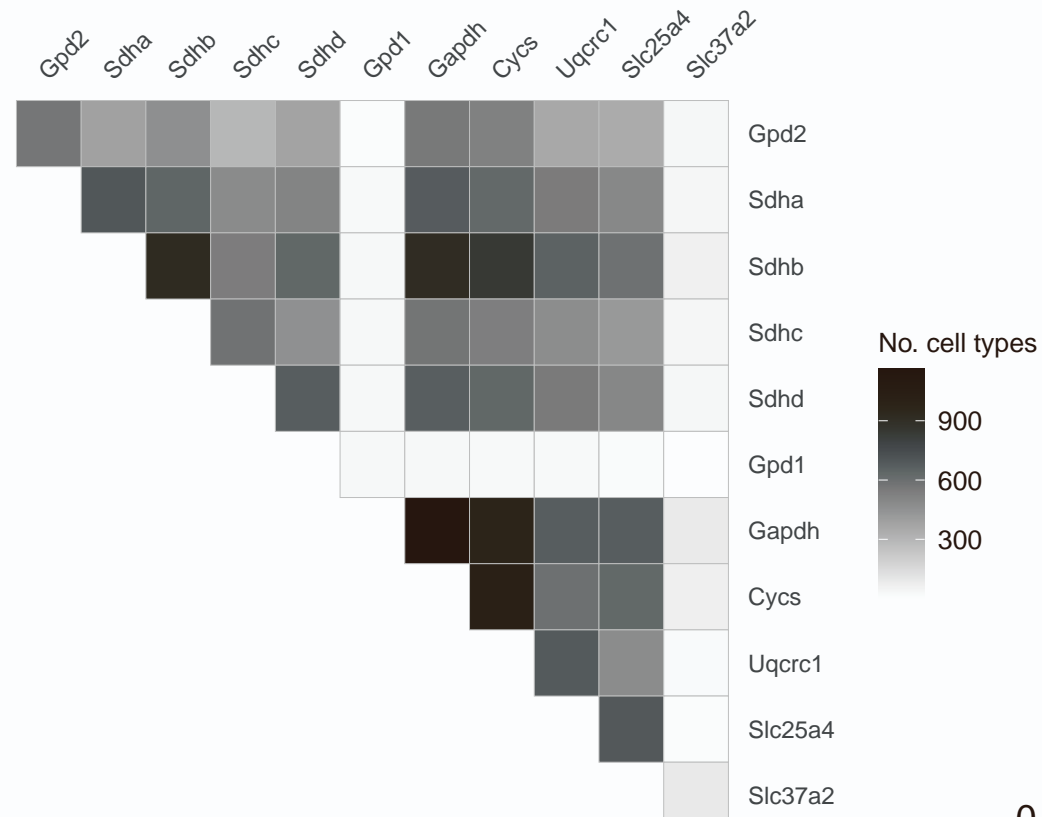

## Silhouette and Z-score

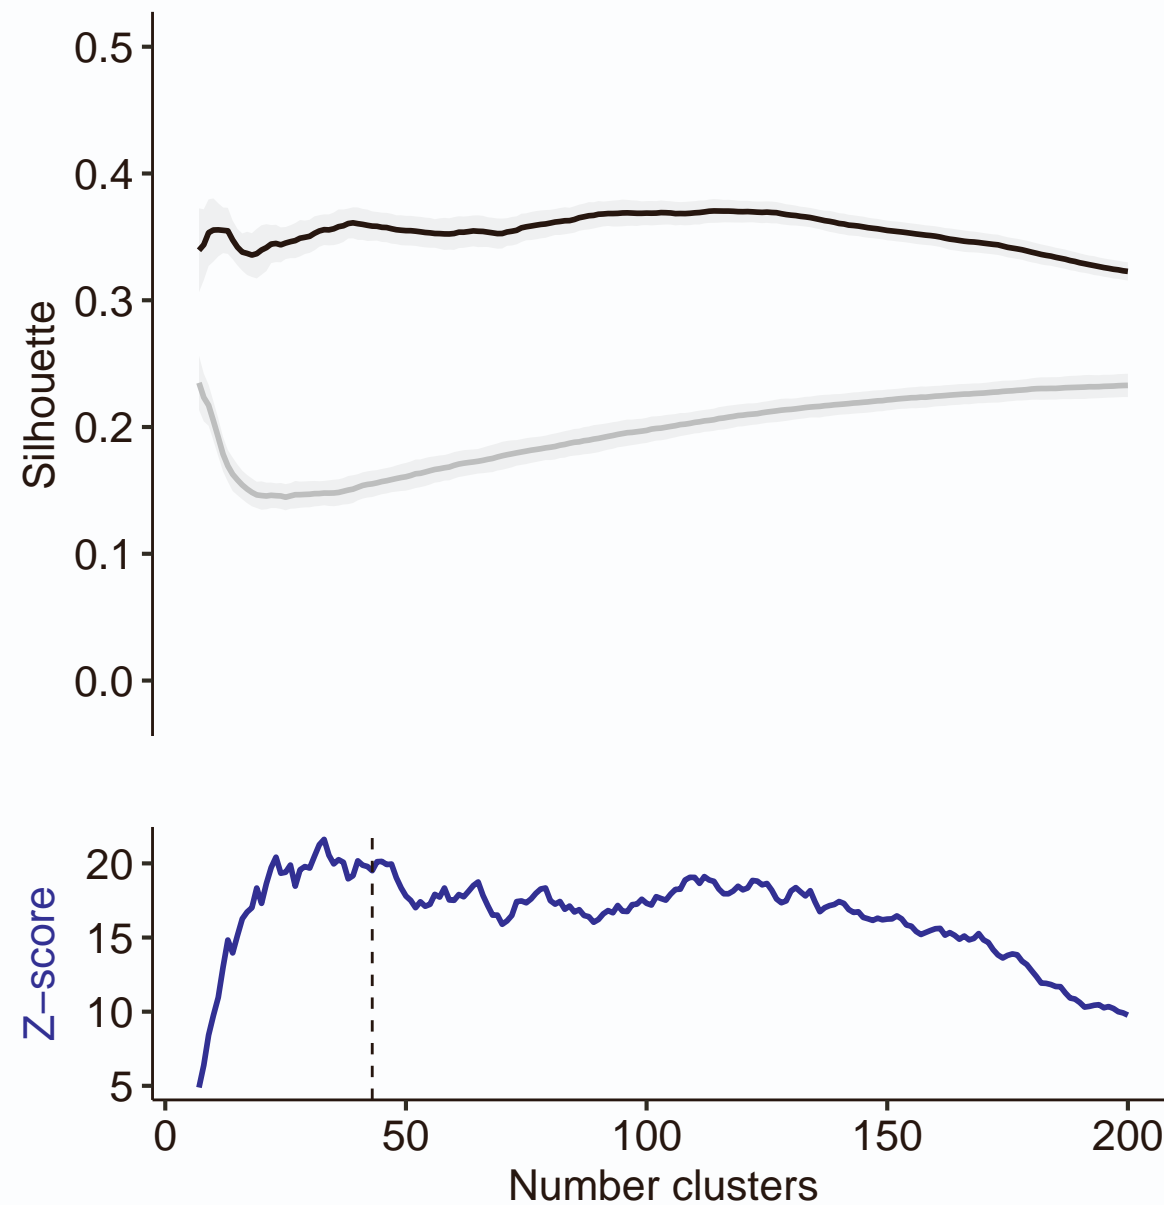

## Global UMAP: Pathway ON

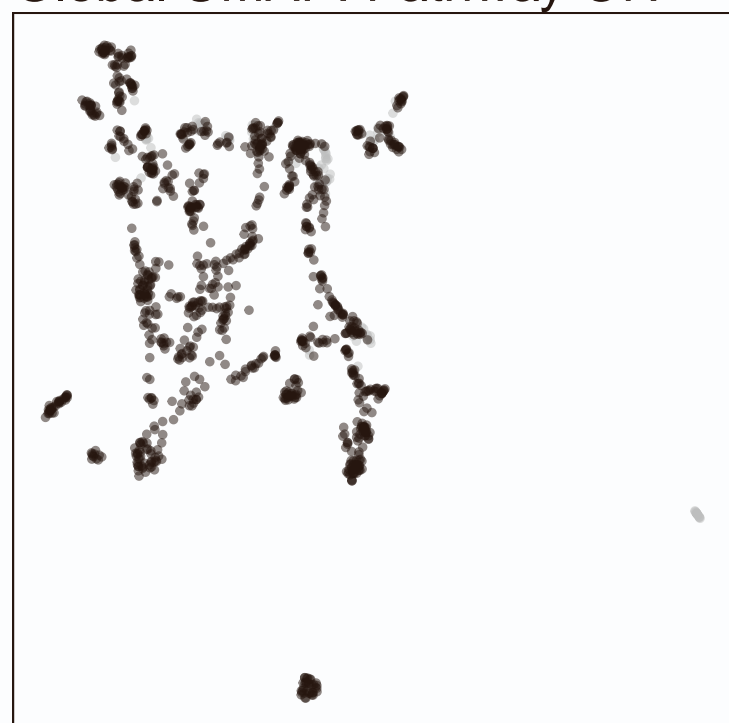

## ECDF of Profile Dispersions

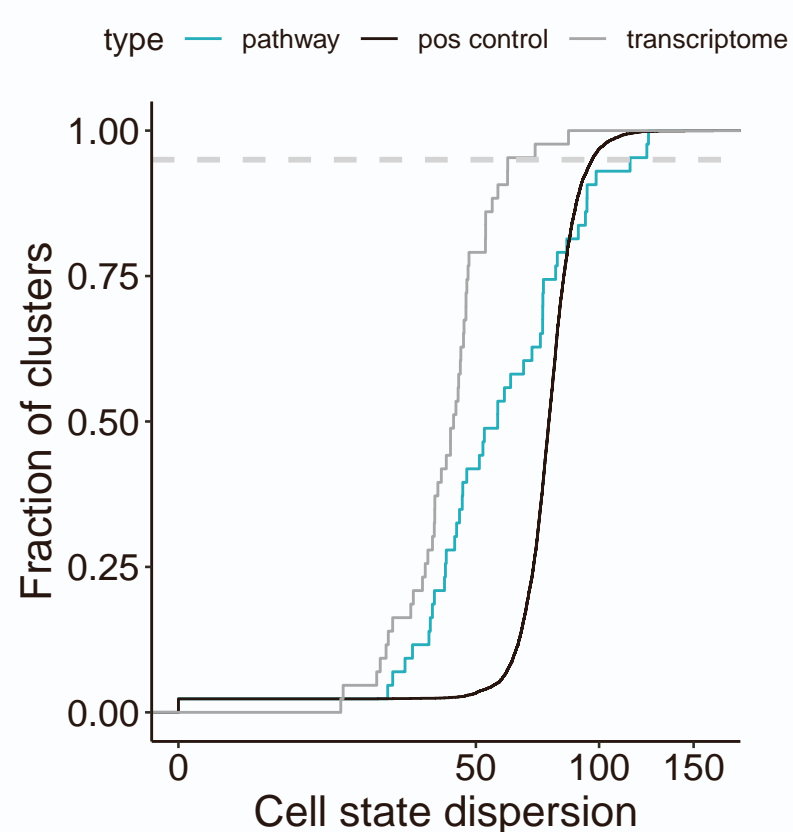

## Profile Dispersion Plot

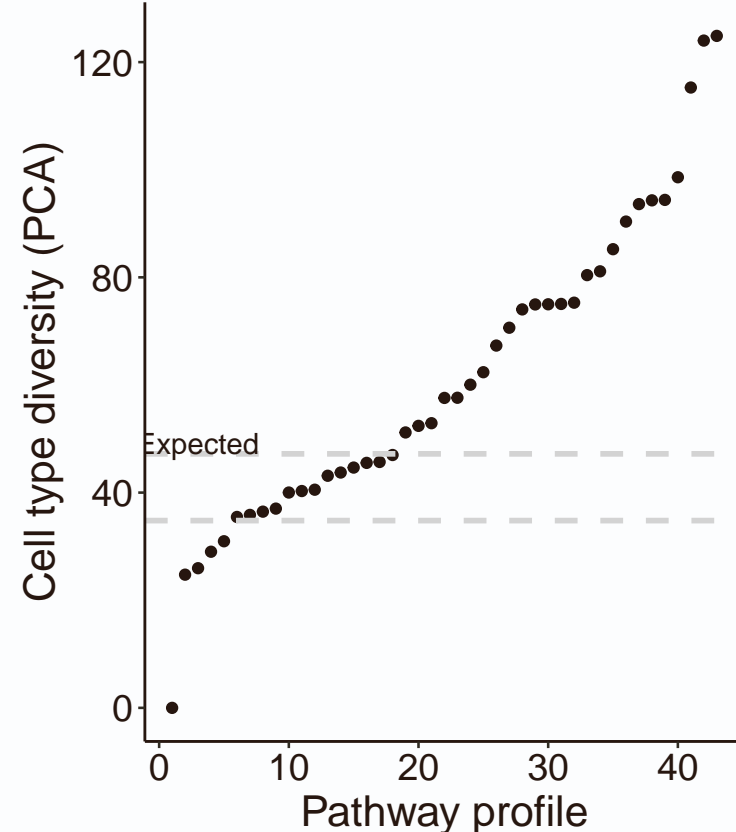

## Motifs, Dispersion $\geq 90^{\text{th}}$ percentile

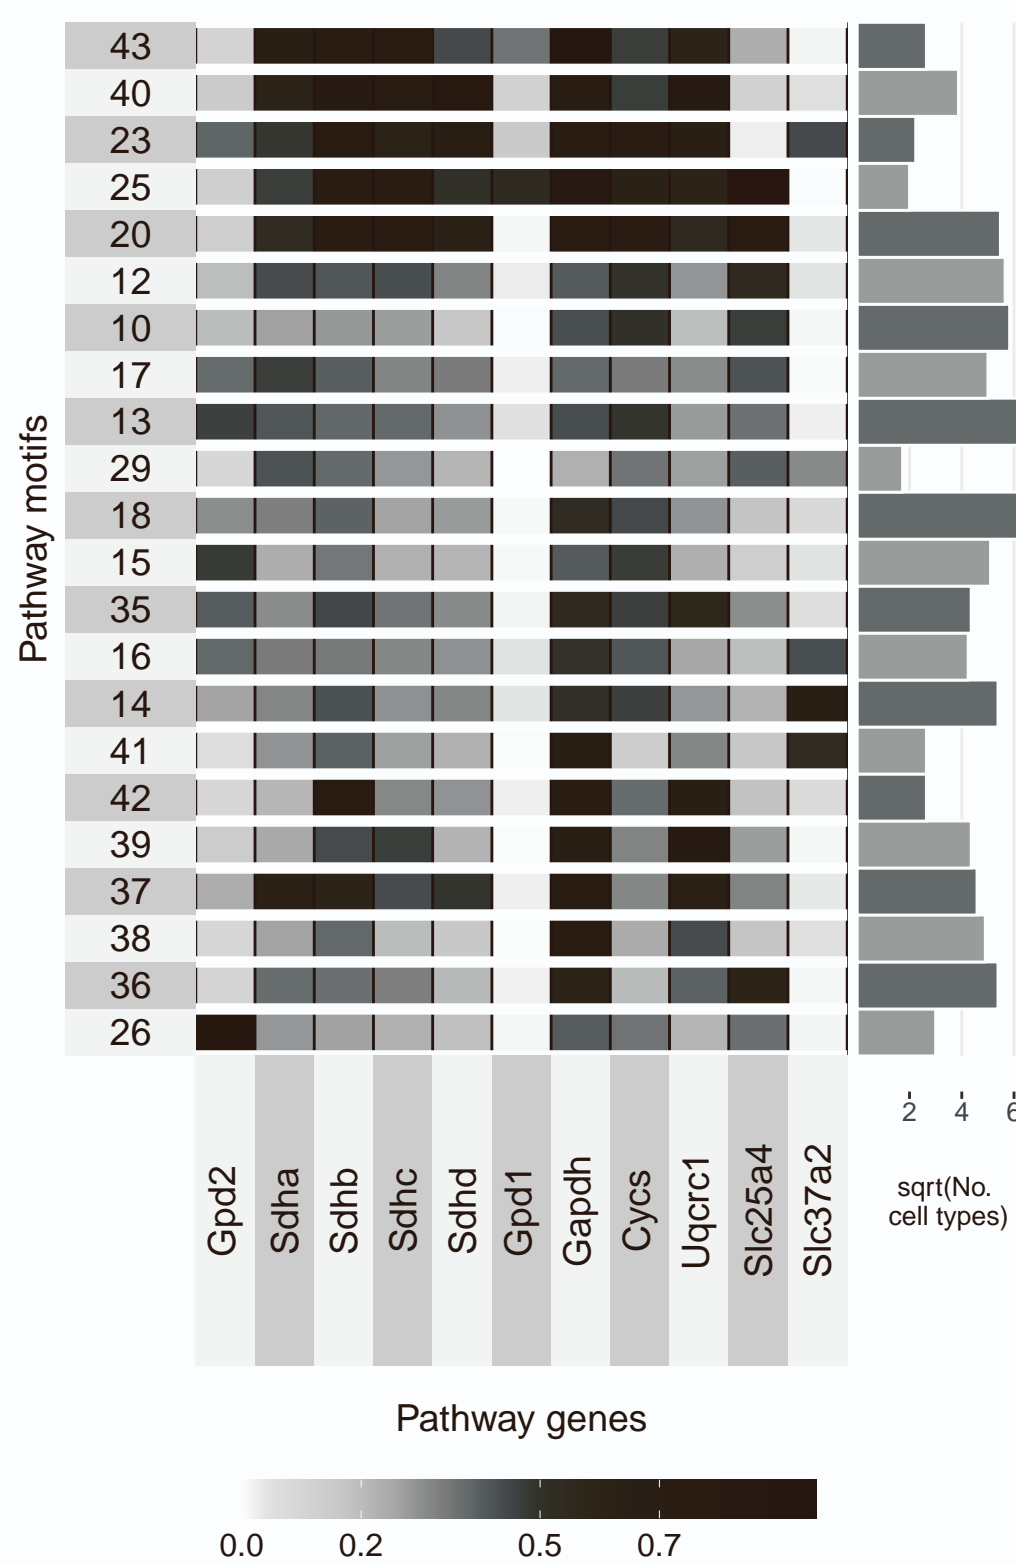

## Motif Tissue Composition

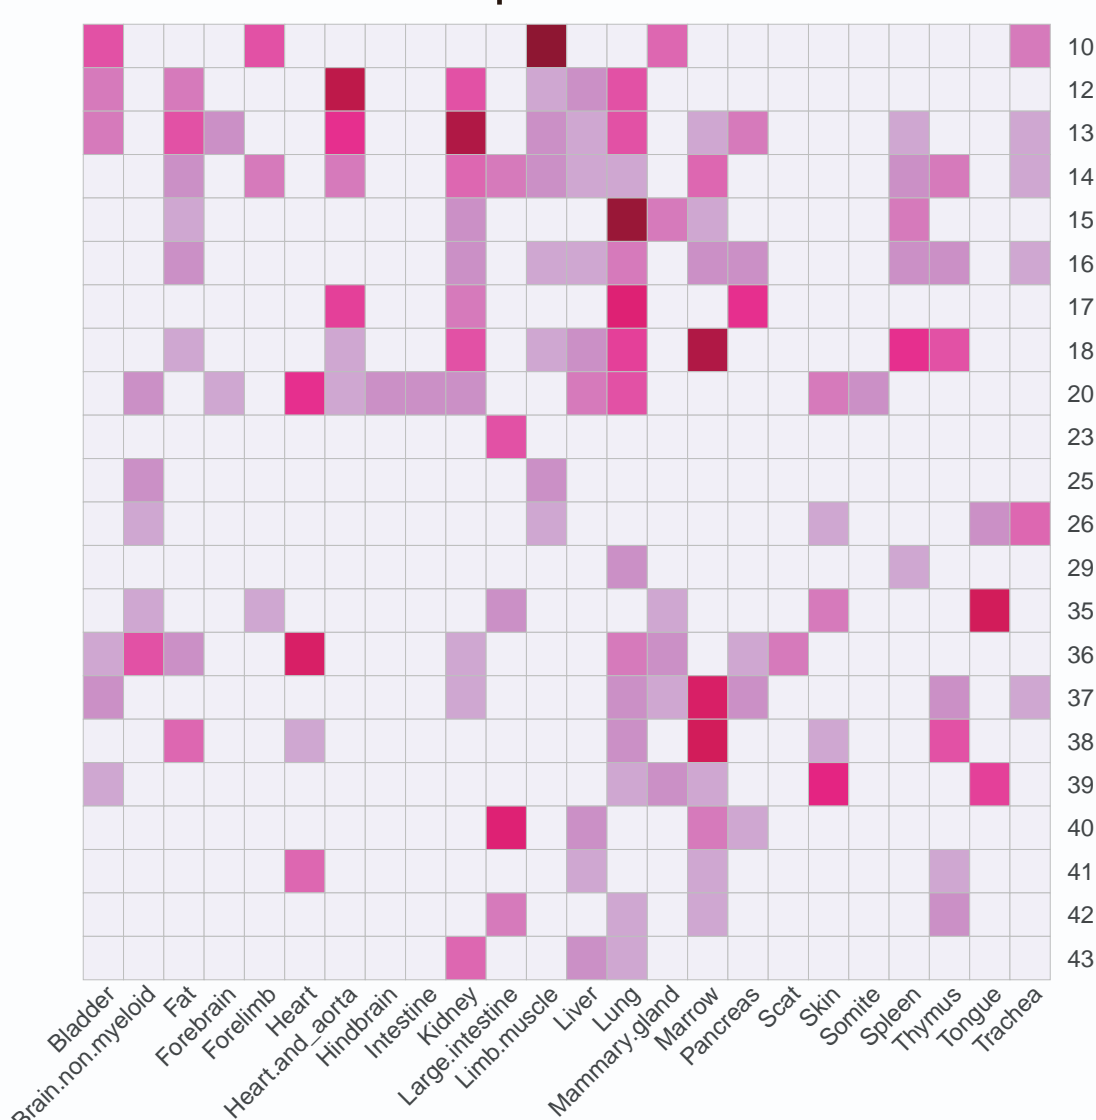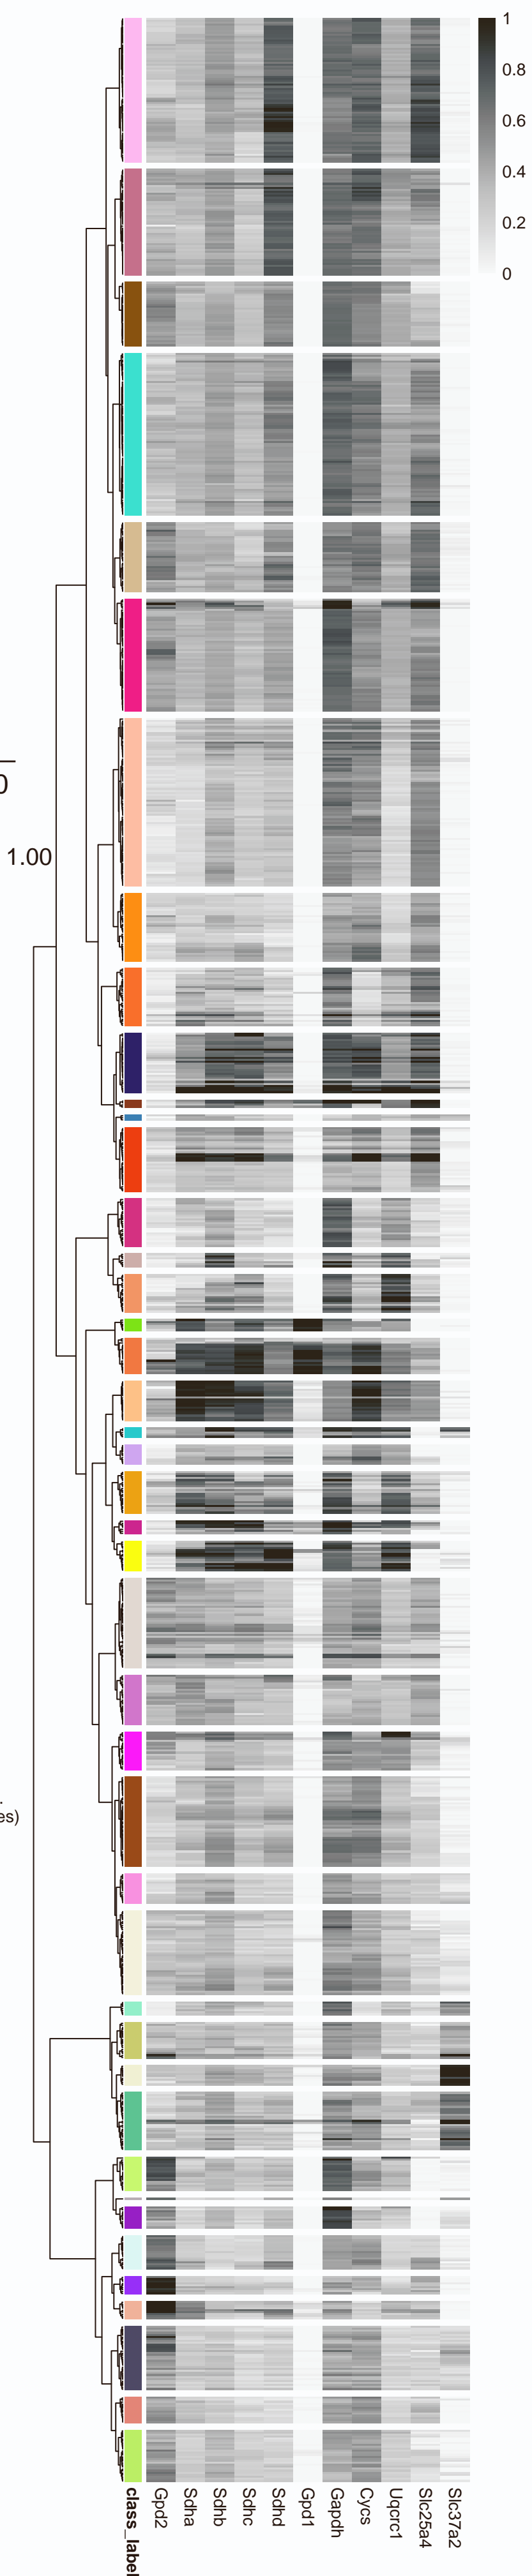

# Mitochondrial Electron Transport Chain (k\_opt = 43)

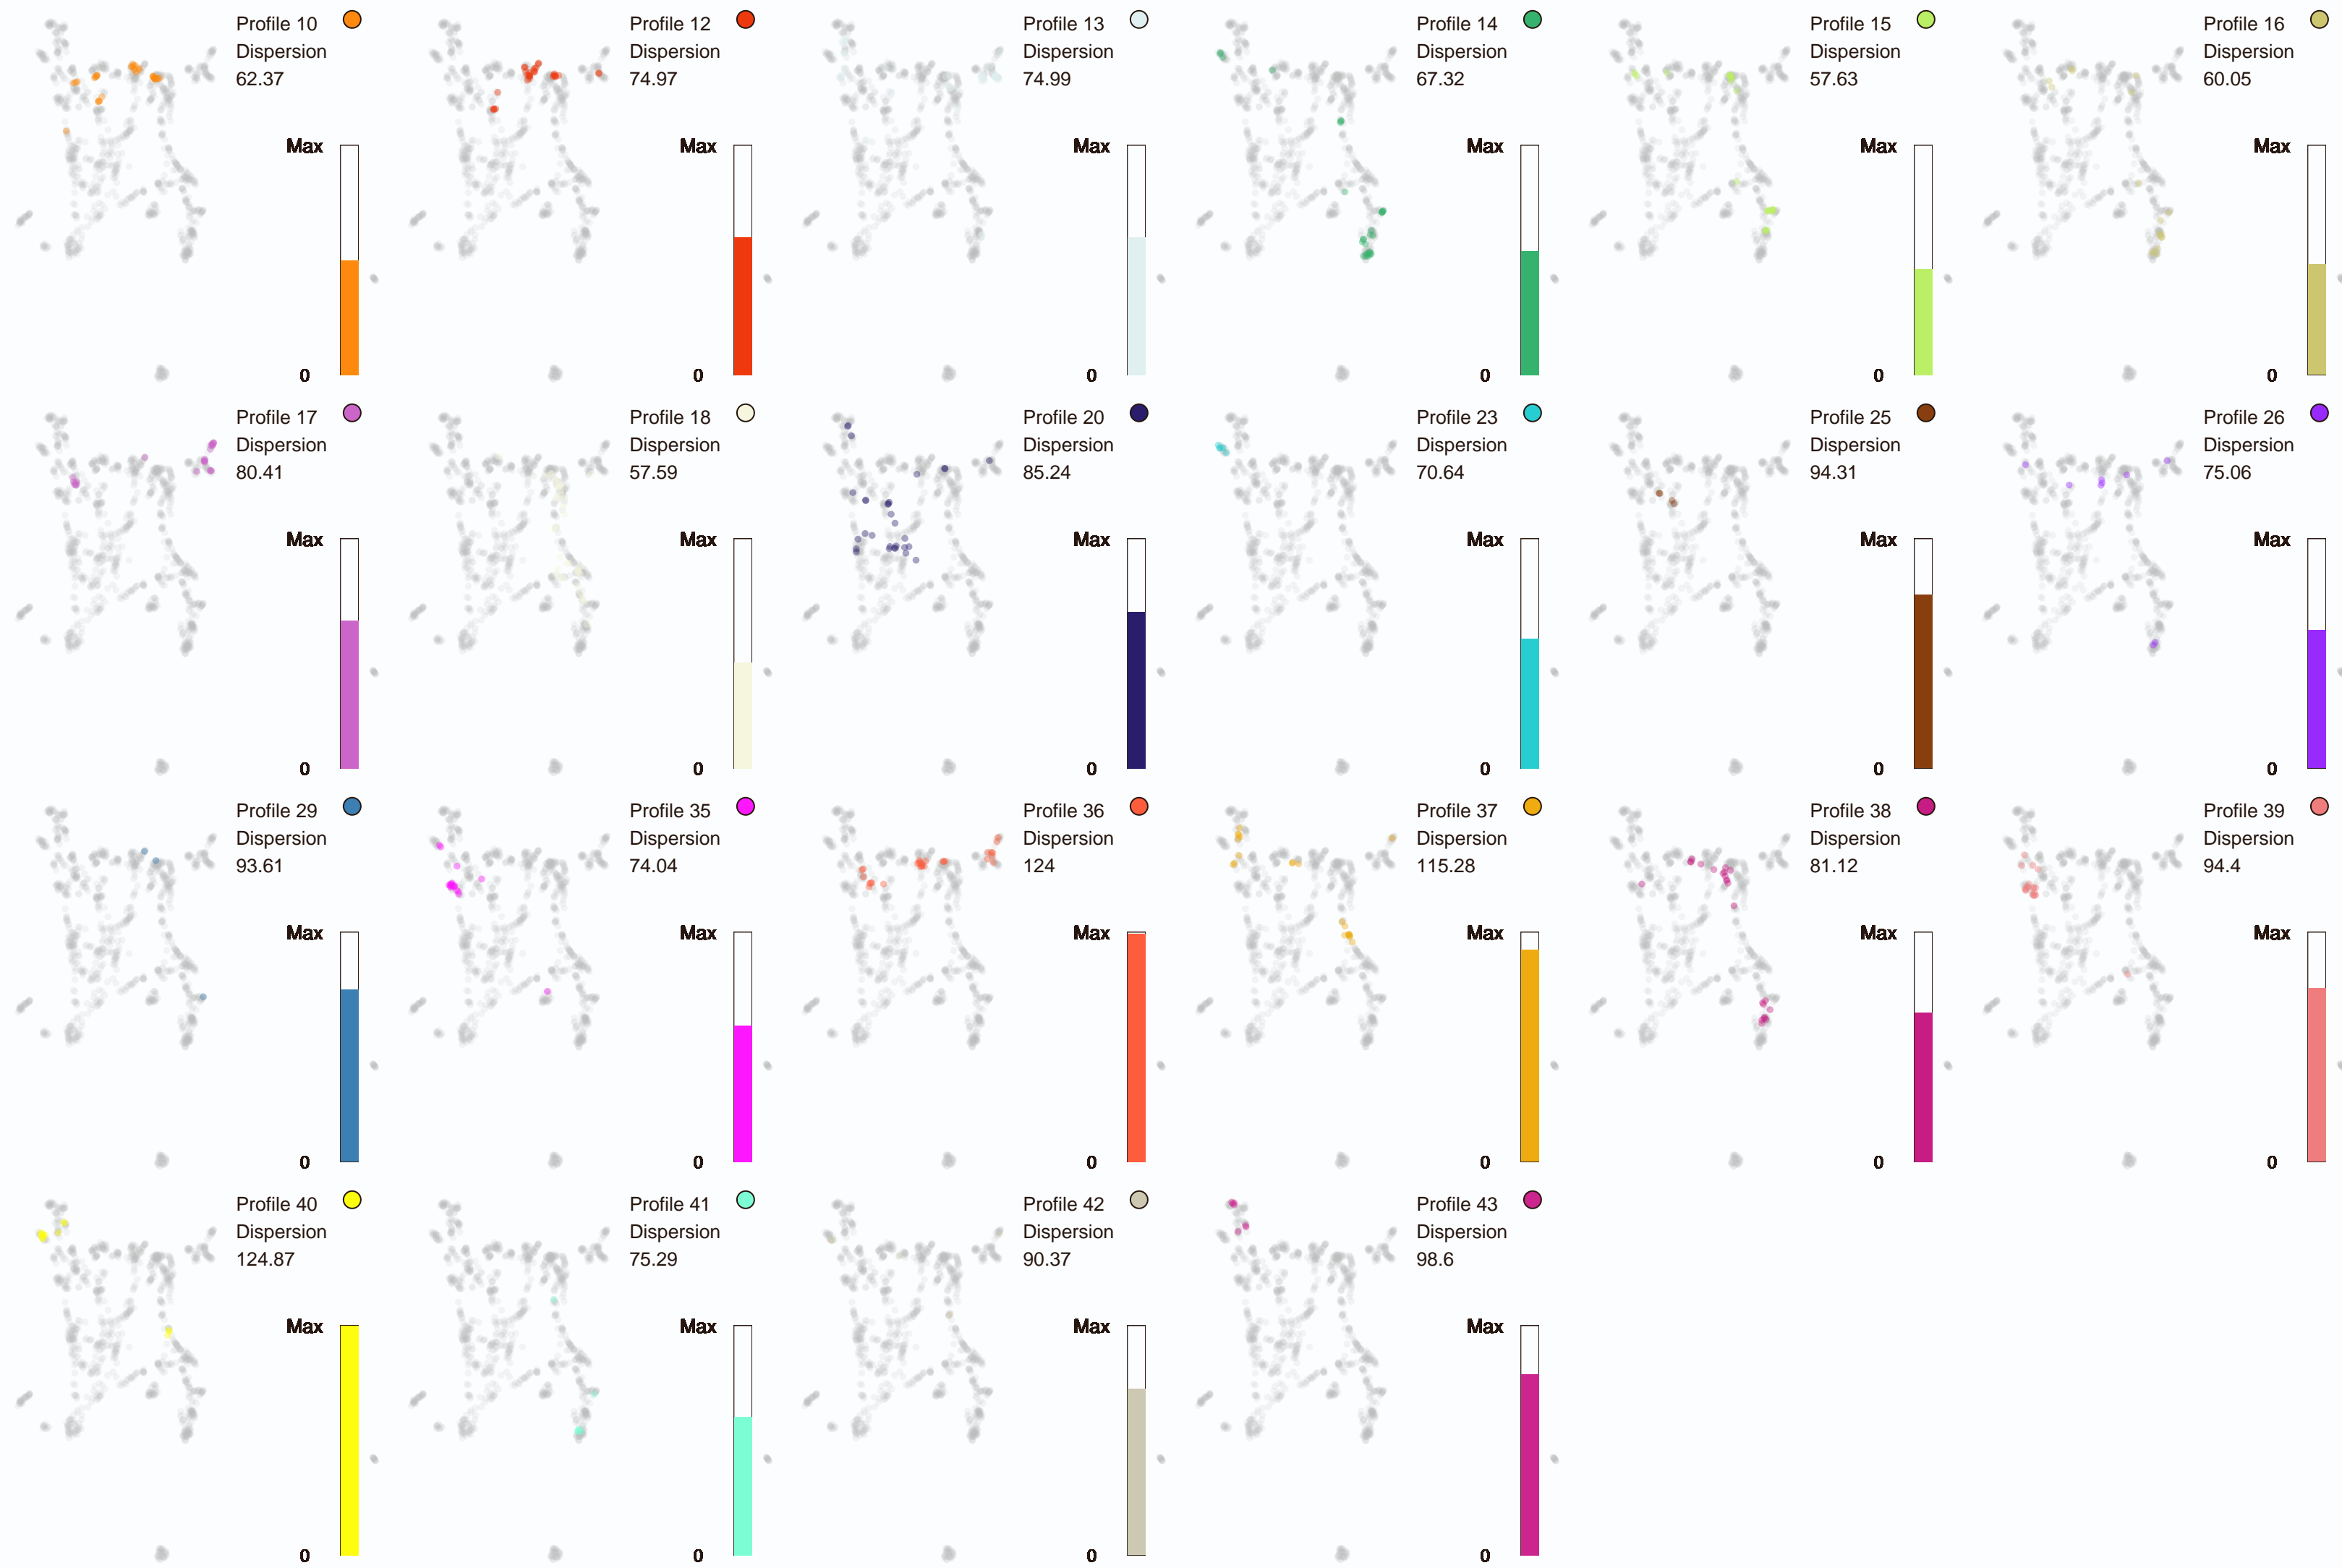

# NF- $\kappa$ B Signaling Pathway (k\_opt = 113)

Rela  
Nfkb1  
Map3k1  
Map3k14  
Chuk  
Irak1  
Myd88  
Traf6

Pathway genes  
Tnfrsf1a  
Tnfrsf1b  
Fadd  
Tradd  
Ripk1  
Tab1  
Map3k7

Ikbkb  
Ikbkg  
Nfkbia  
Ubc  
Ncoa3  
Camkk1  
Camkk2

## Gene Co-Expression Above Threshold

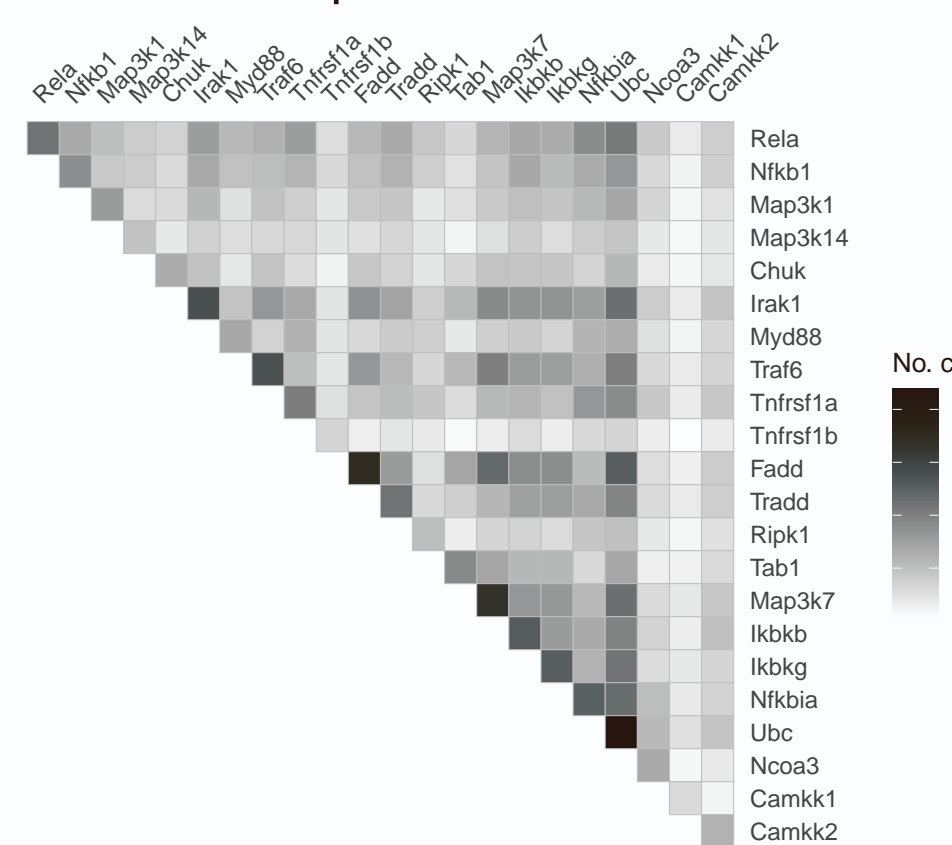

## Silhouette and Z-score

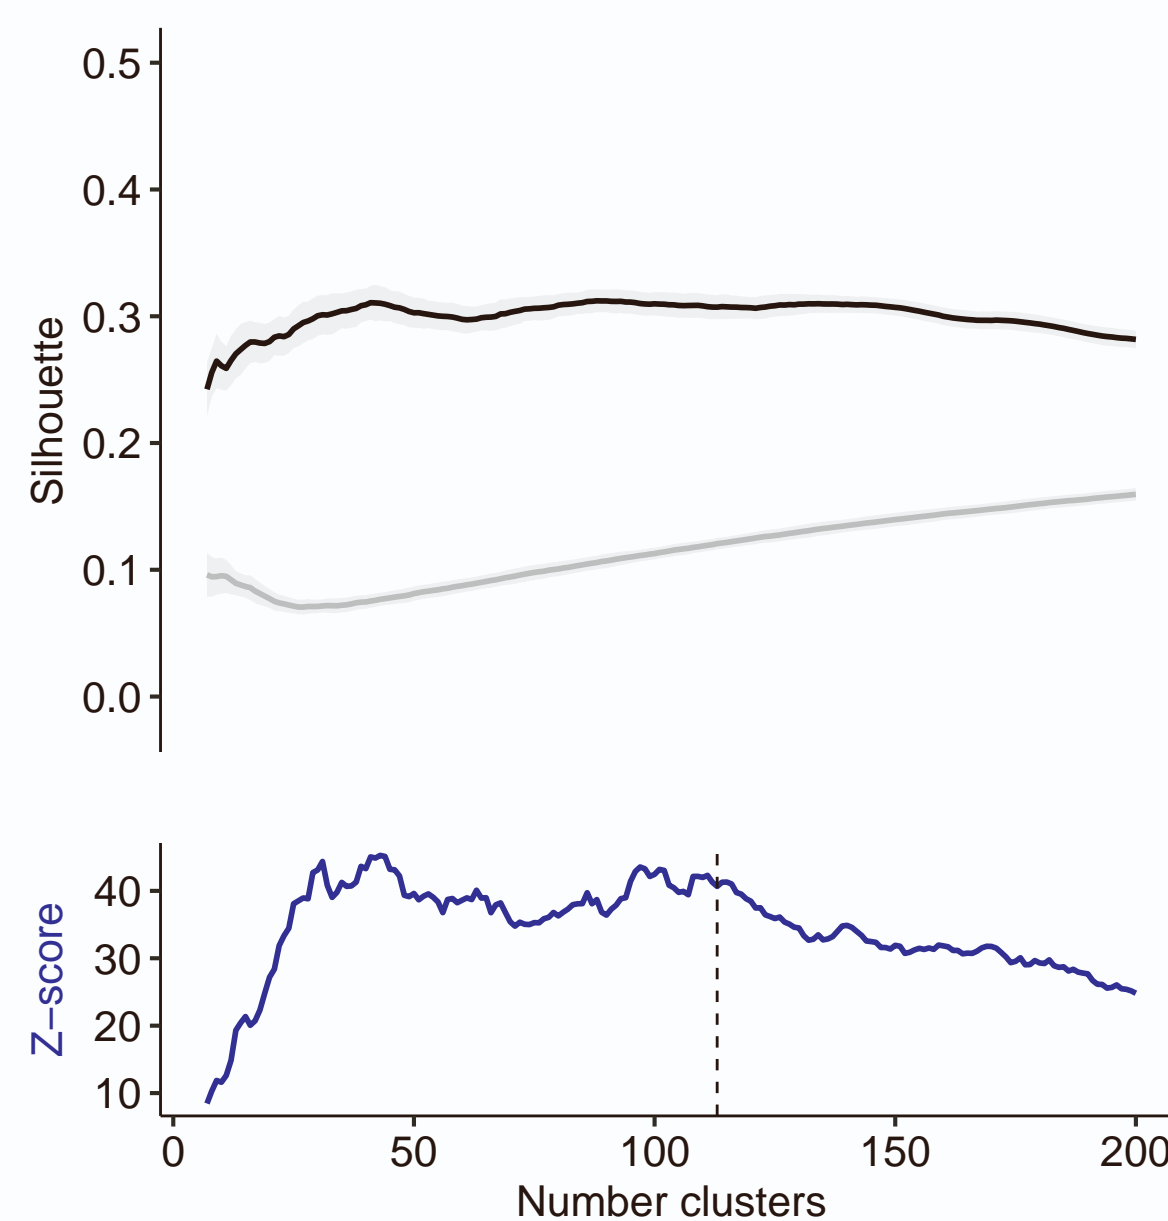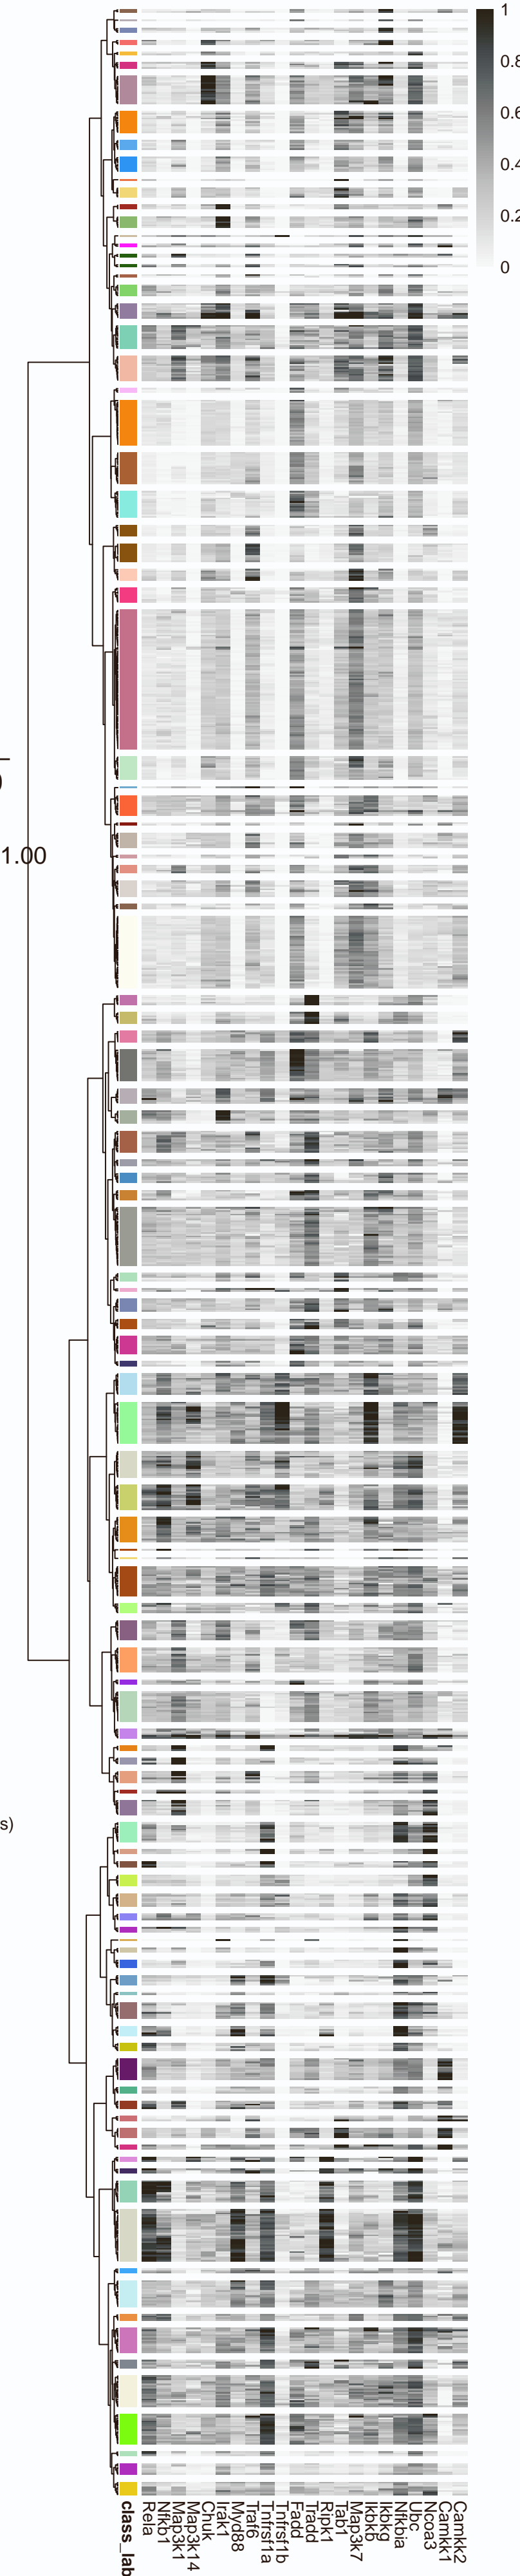

## Global UMAP: Pathway ON

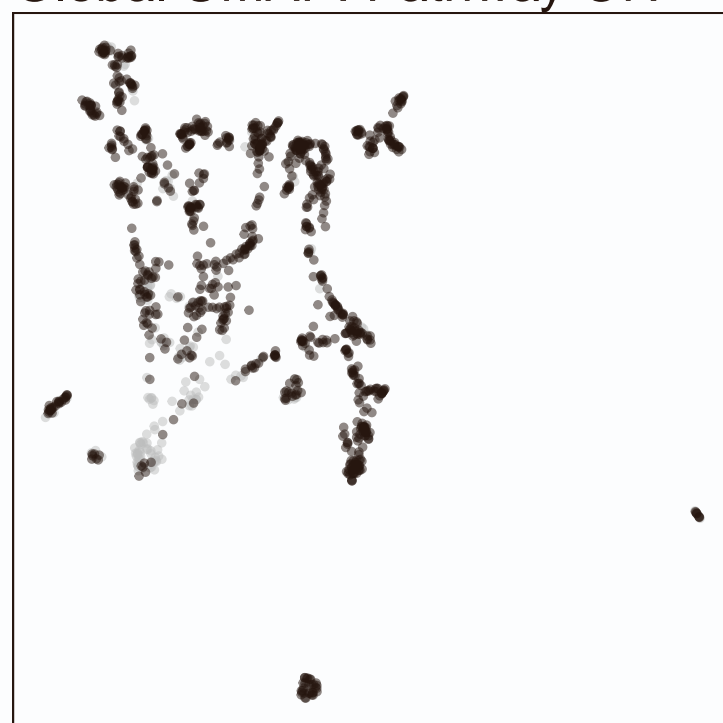

## ECDF of Profile Dispersions

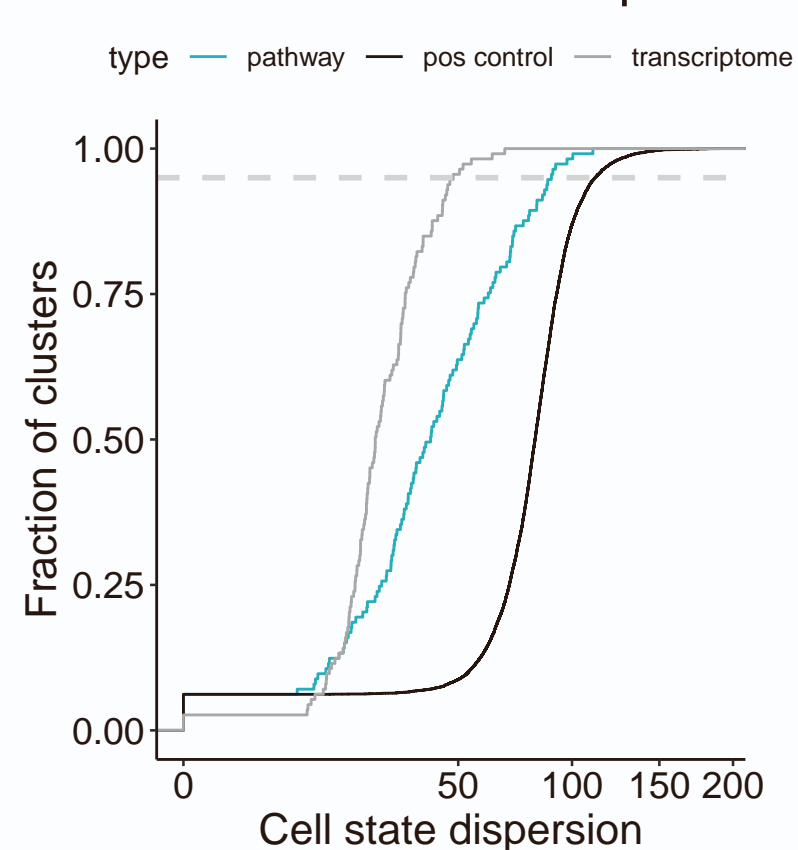

## Profile Dispersion Plot

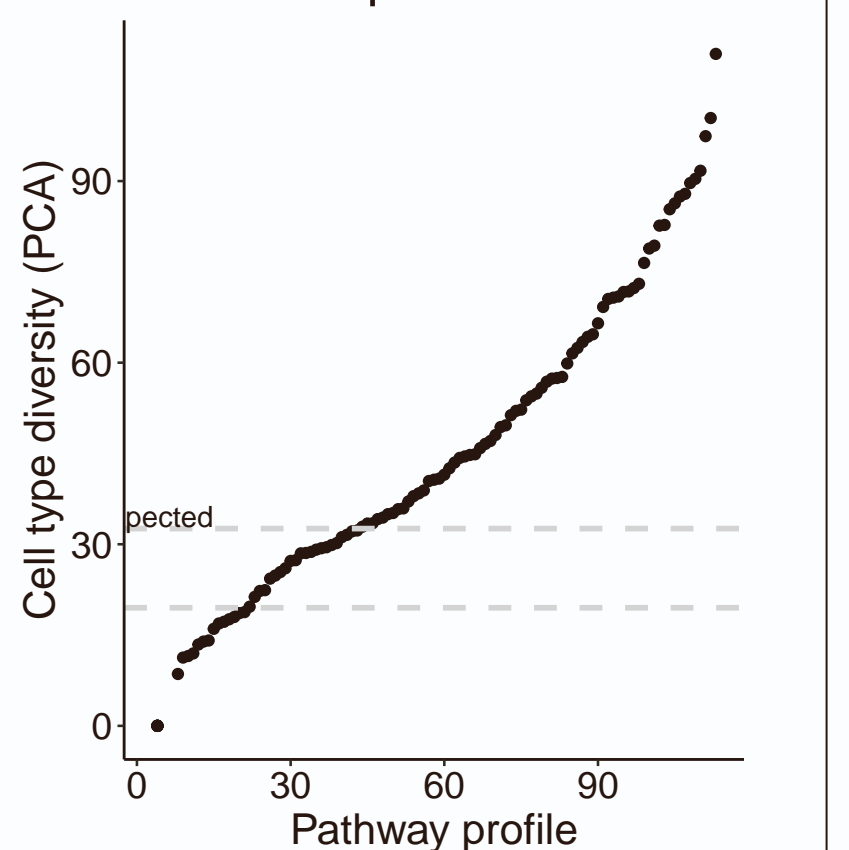

## Motifs, Dispersion $\geq 90^{\text{th}}$ percentile

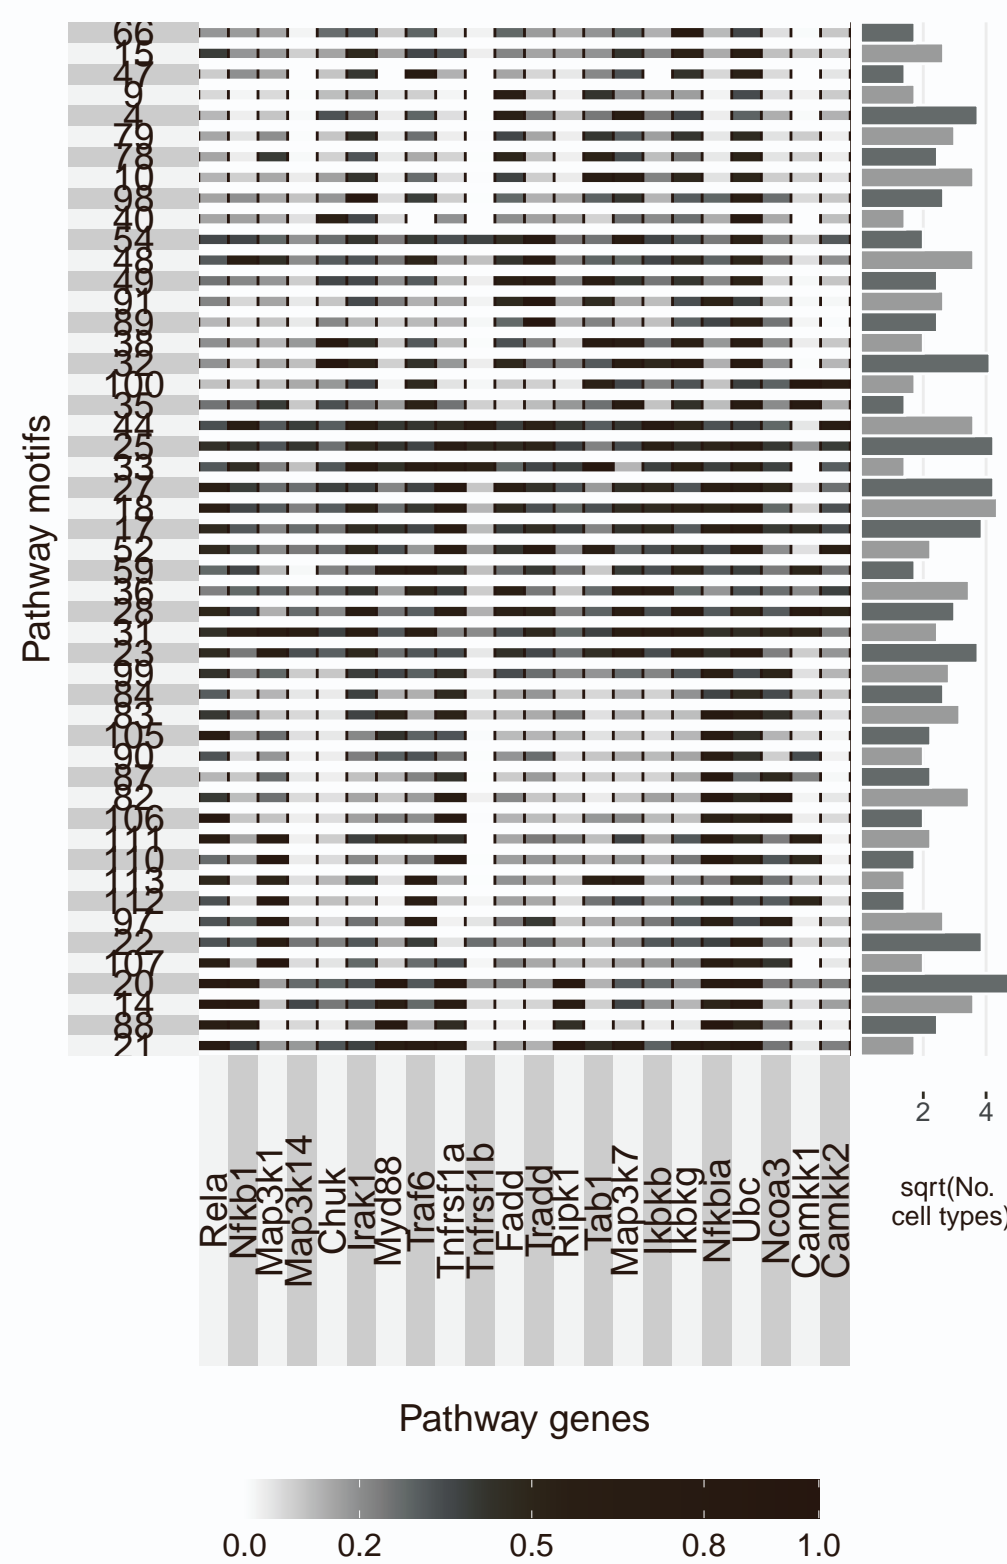

## Motif Tissue Composition

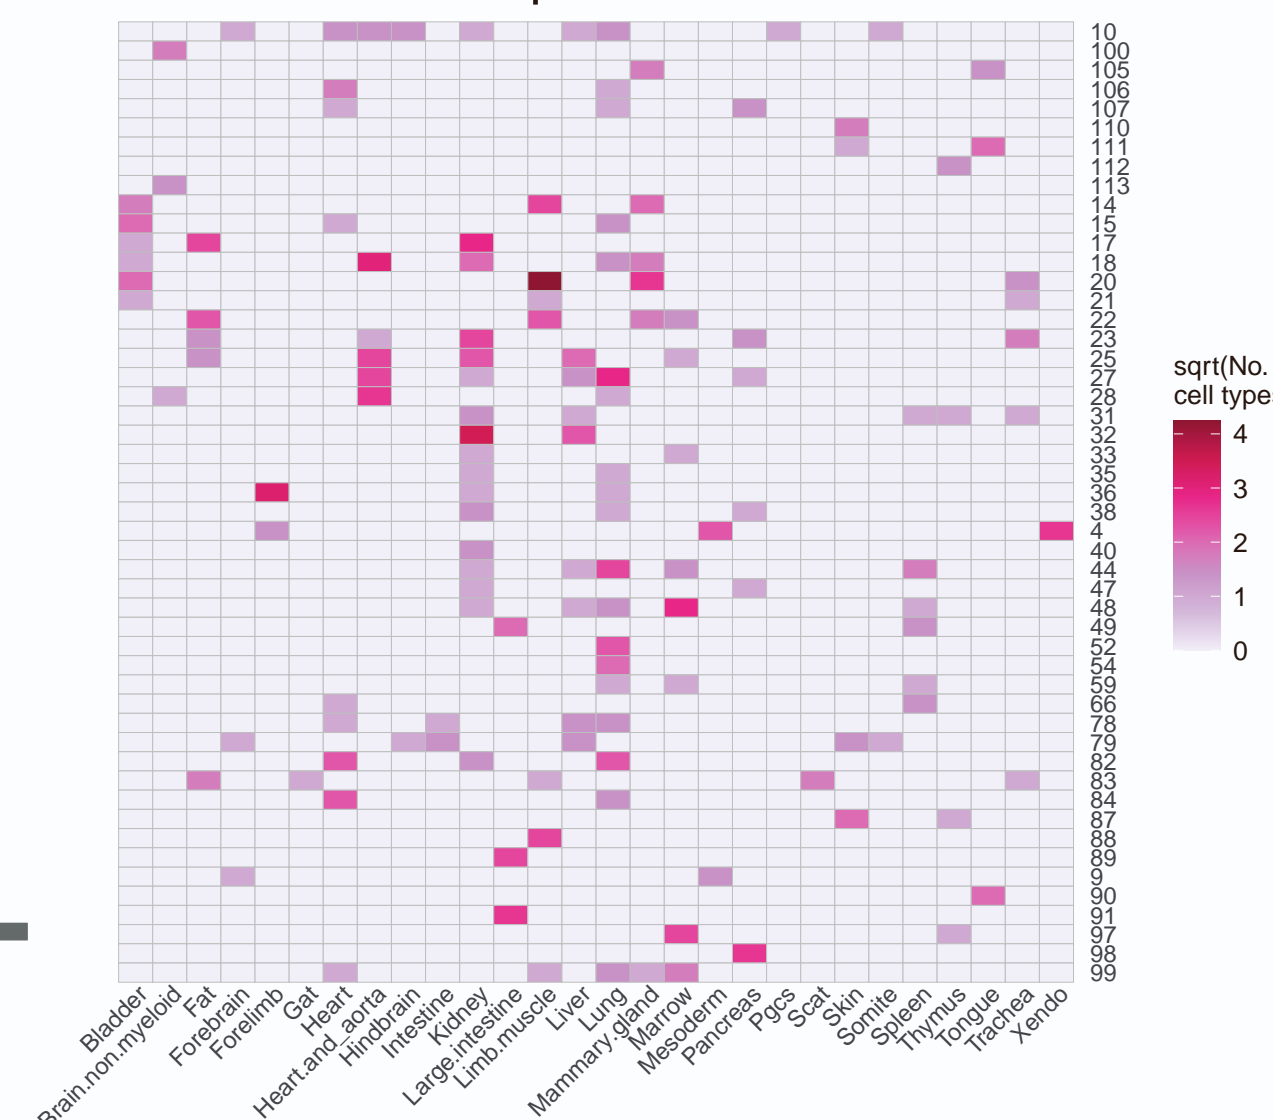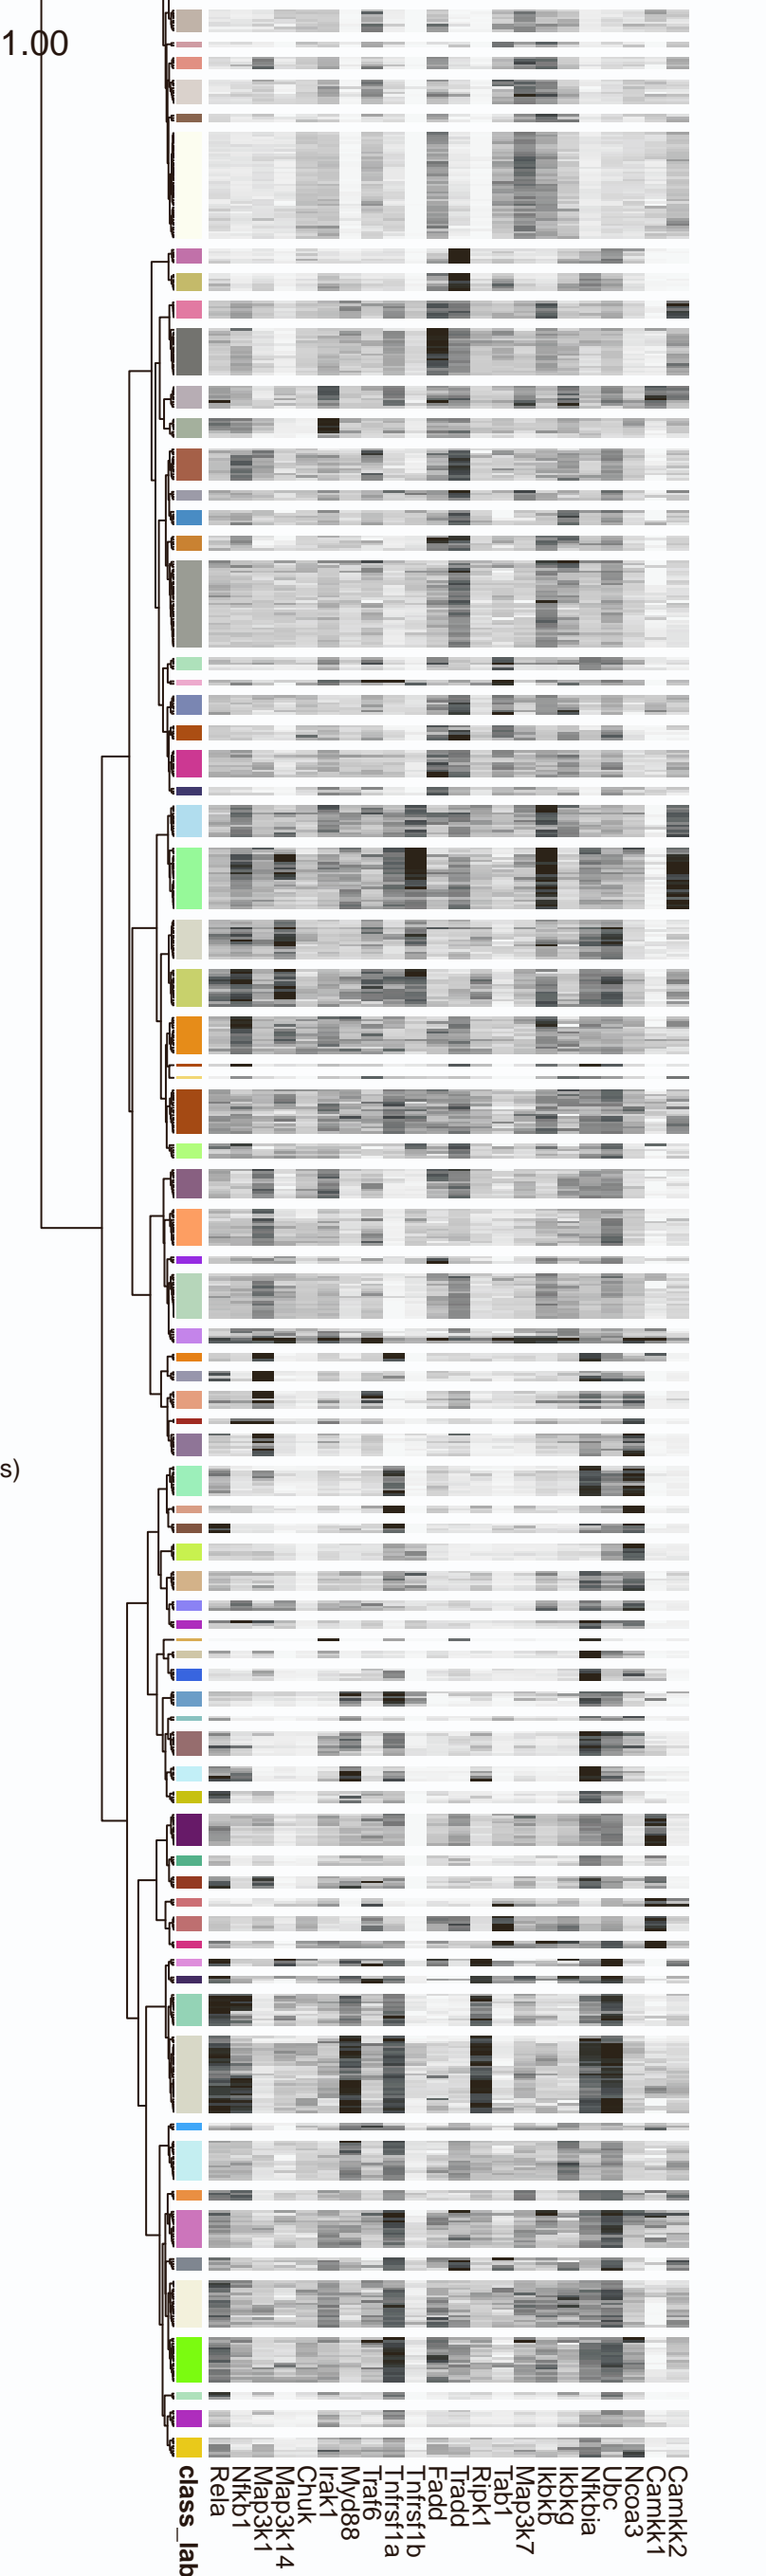

# NF- $\kappa$ B Signaling Pathway ( $k_{opt} = 113$ )

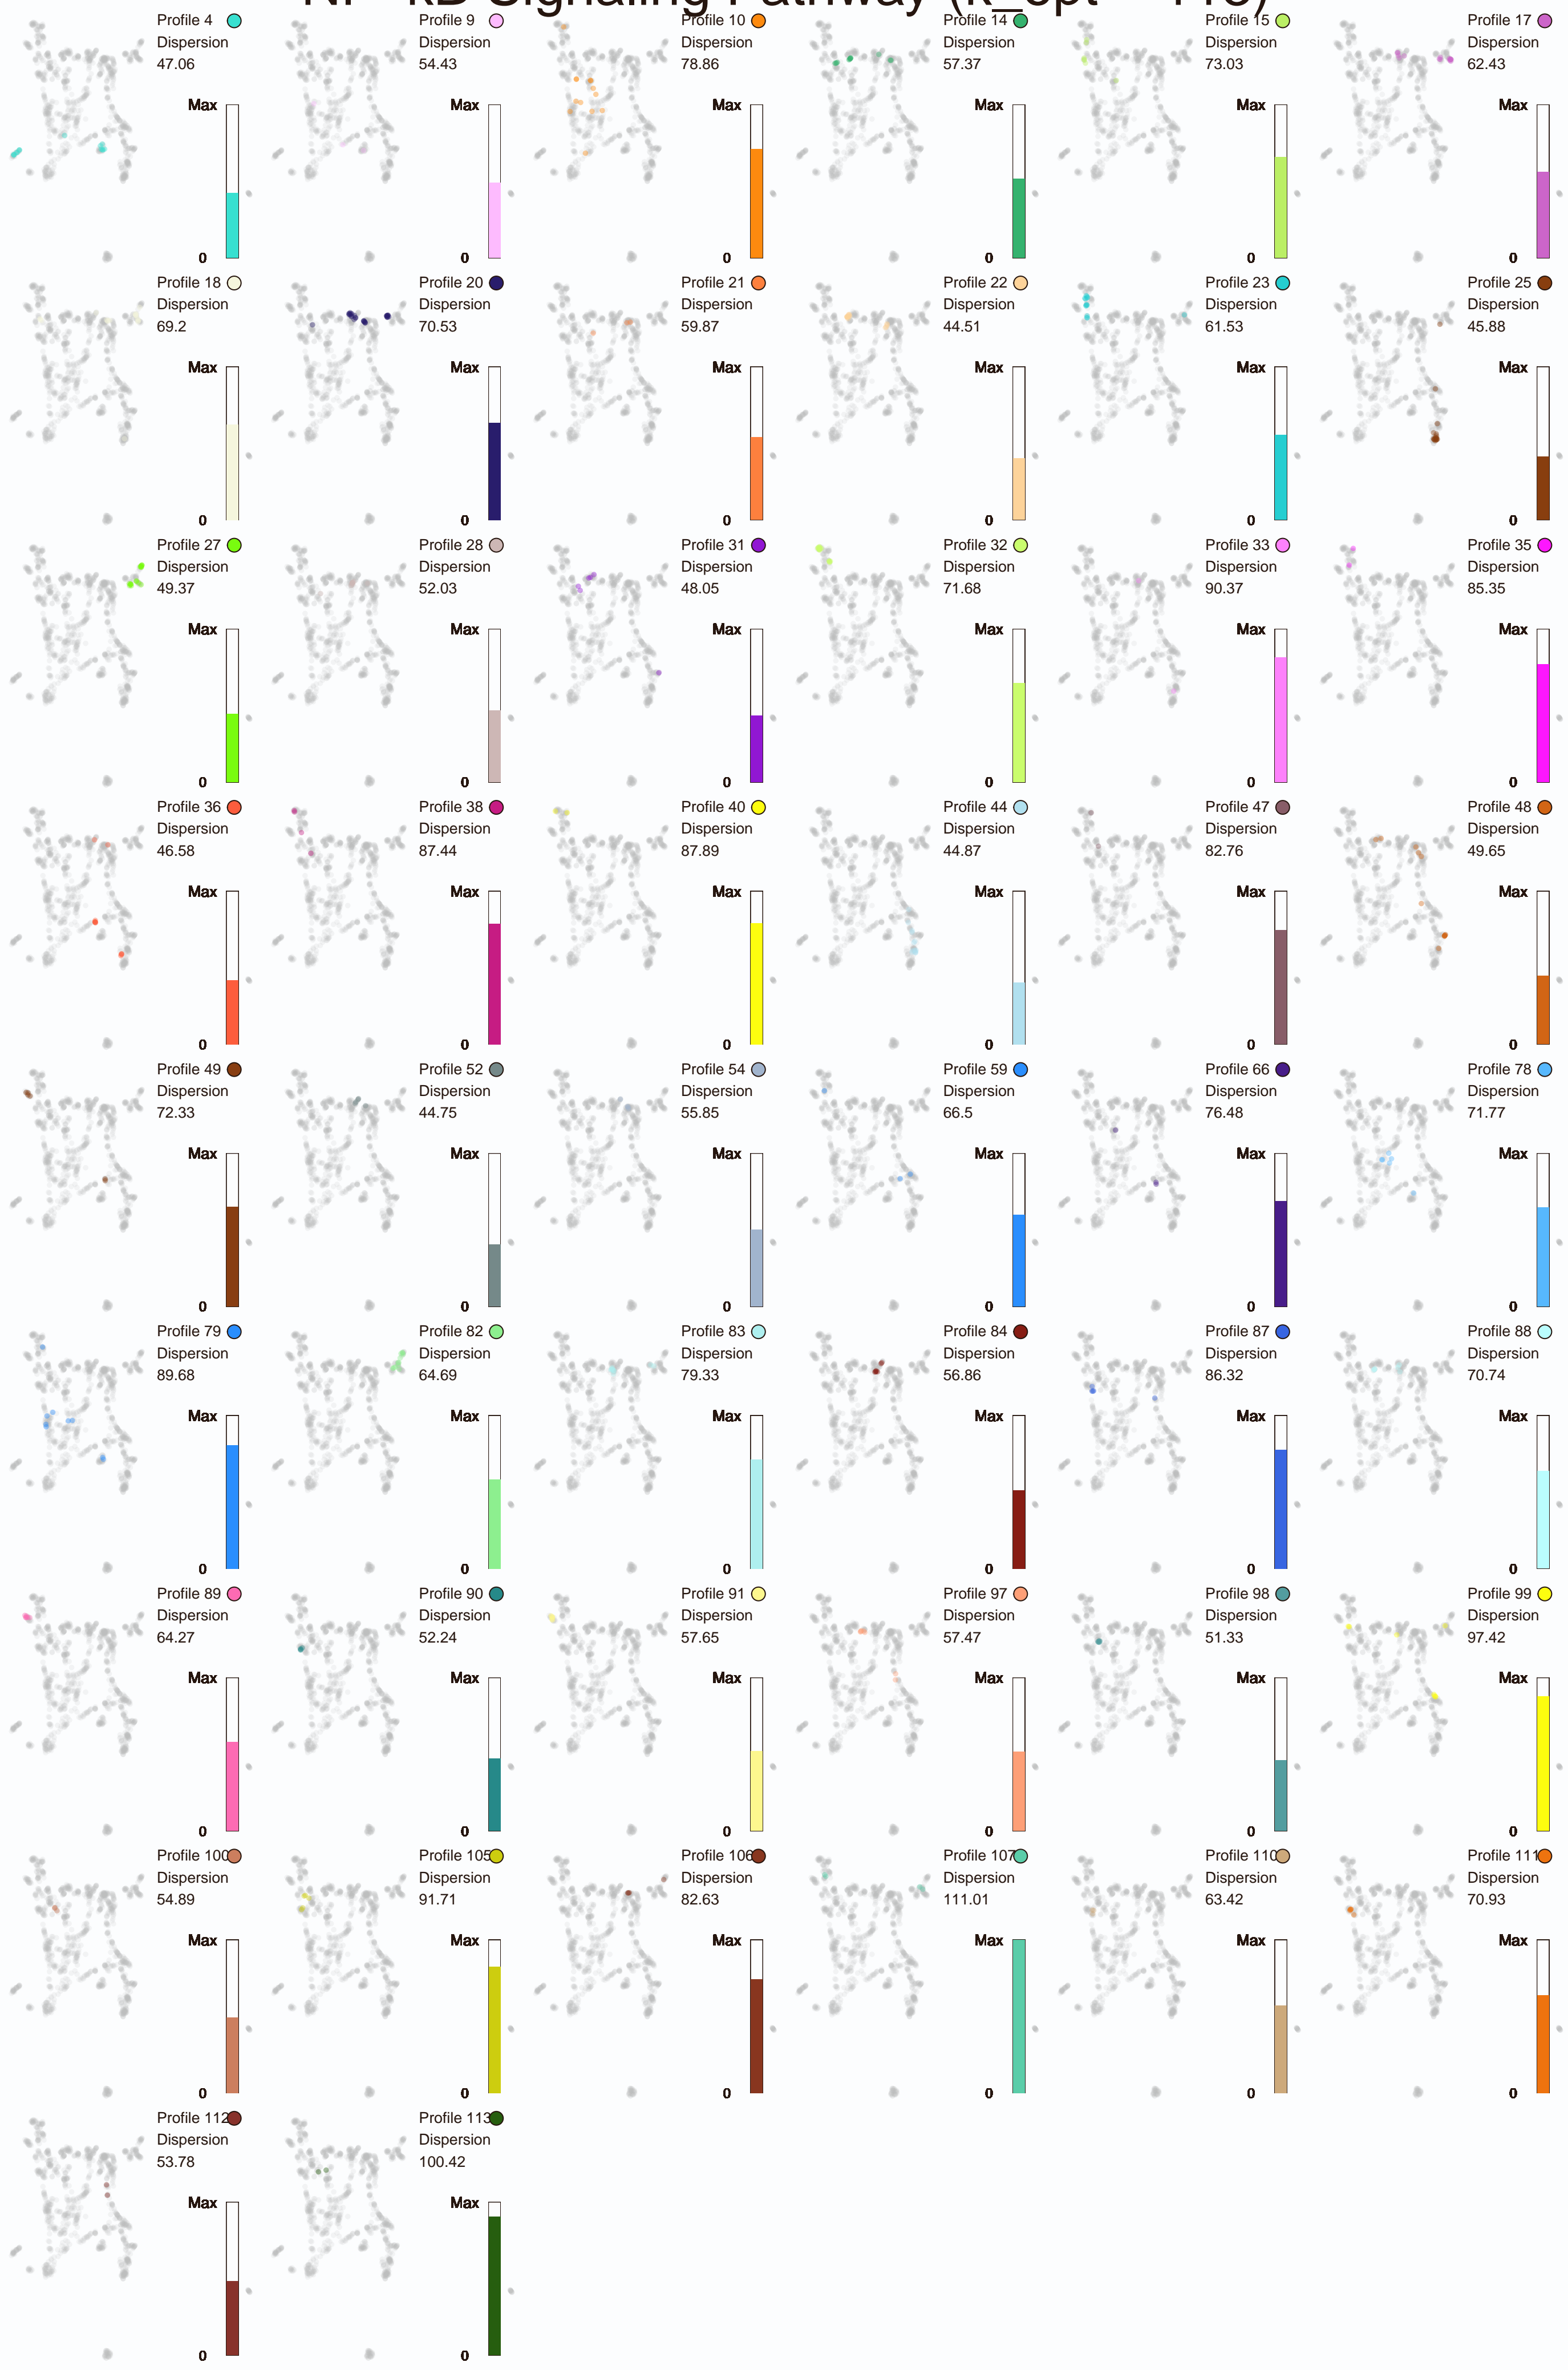

# Nitric Oxide Signaling Pathway (k\_opt = 28)

Grin1  
Grin2a  
Dlg4

Pathway genes  
Nos1  
Calm3

Ppp3ca  
Prkca  
Prkacb

## Gene Co-Expression Above Threshold

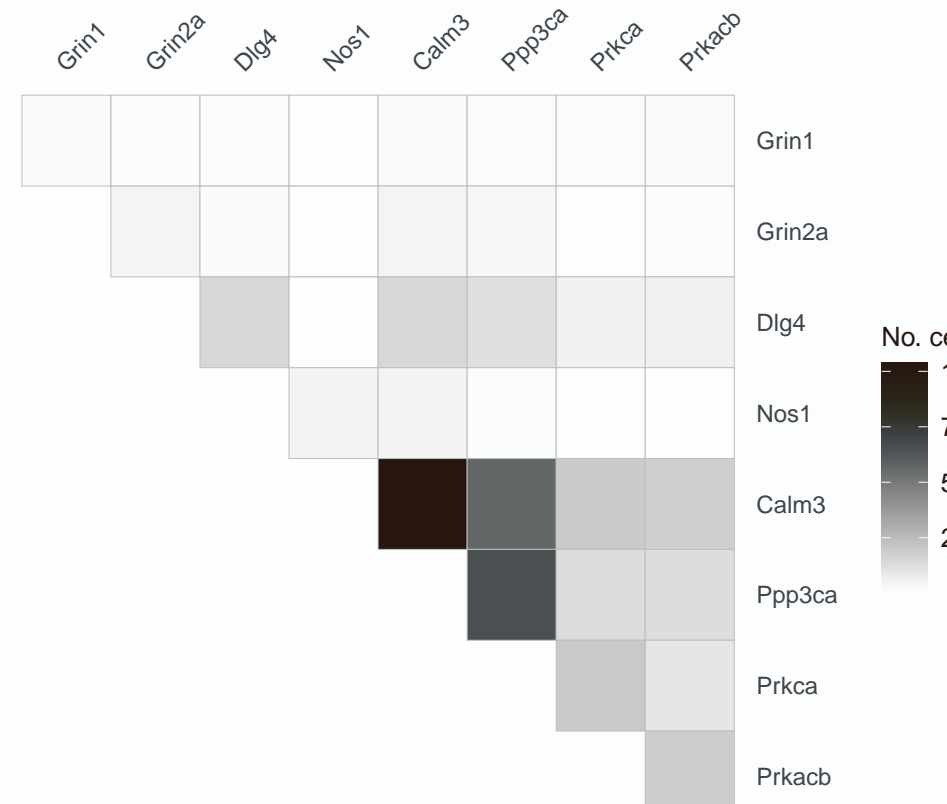

## Silhouette and Z-score

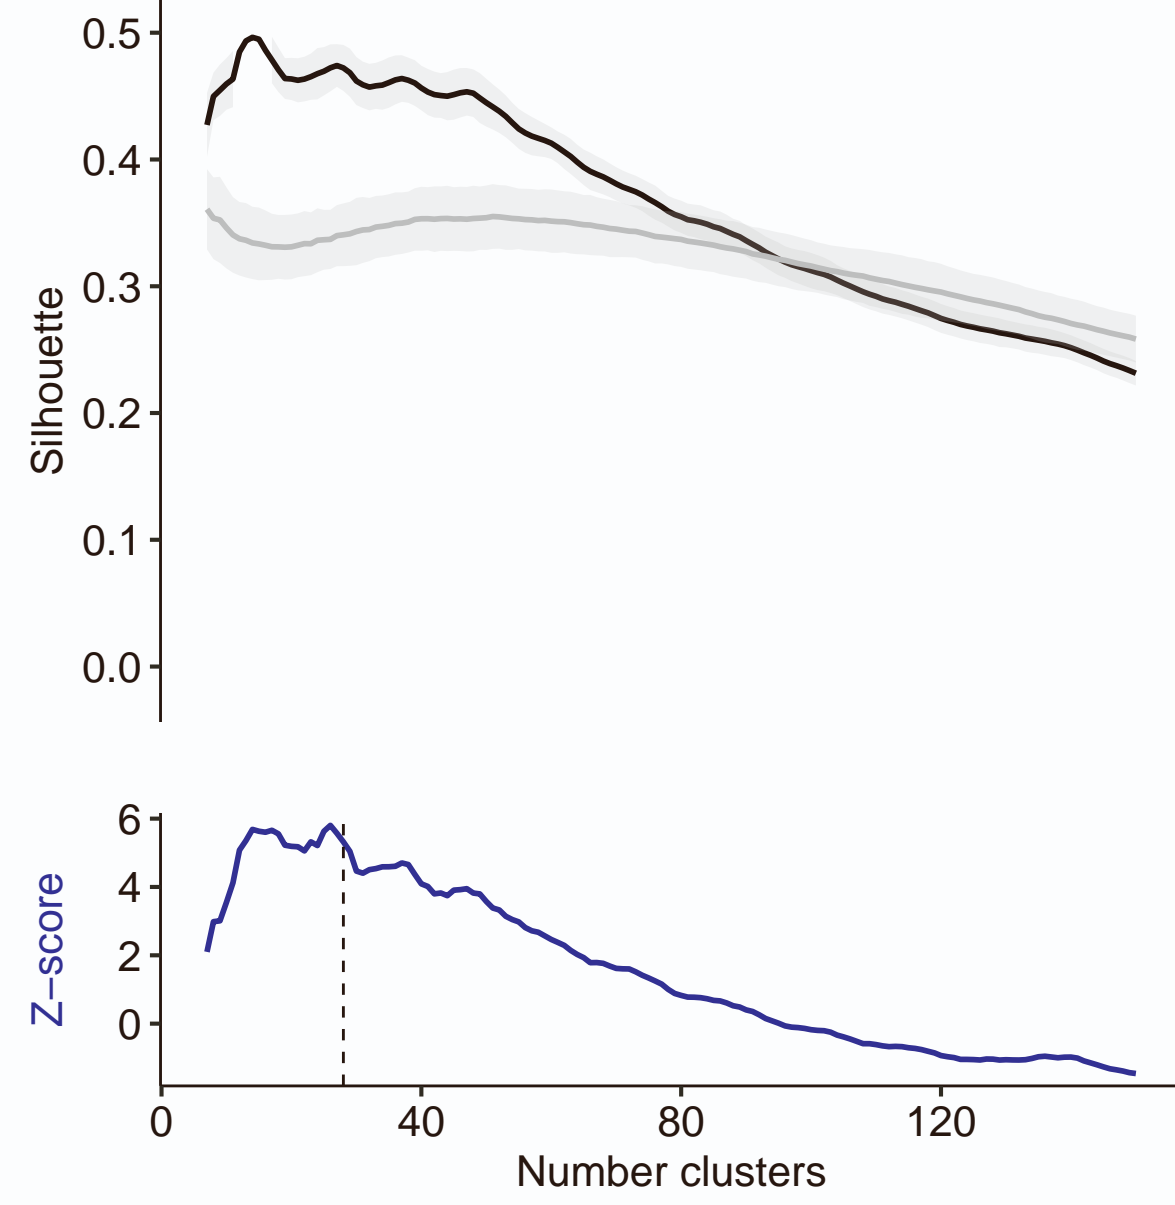

## Global UMAP: Pathway ON

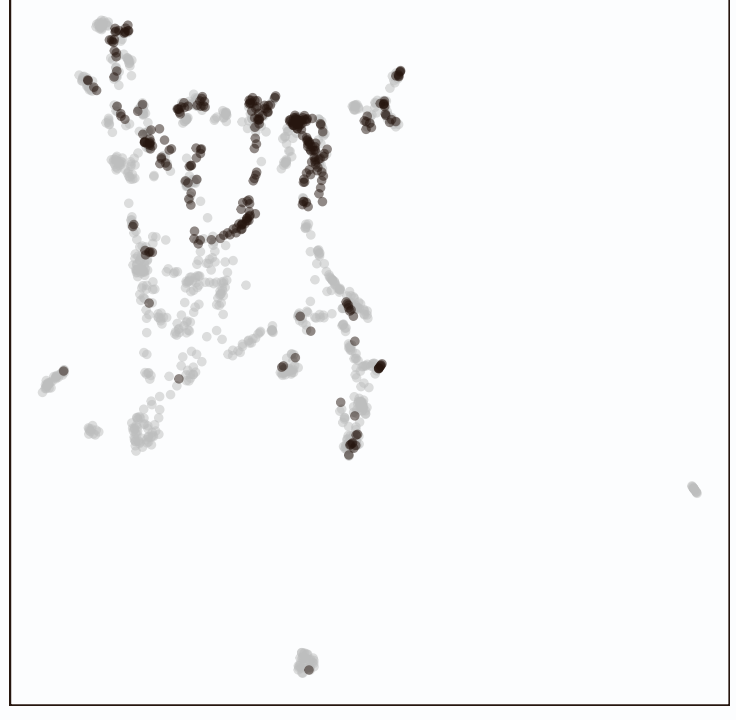

## ECDF of Profile Dispersions

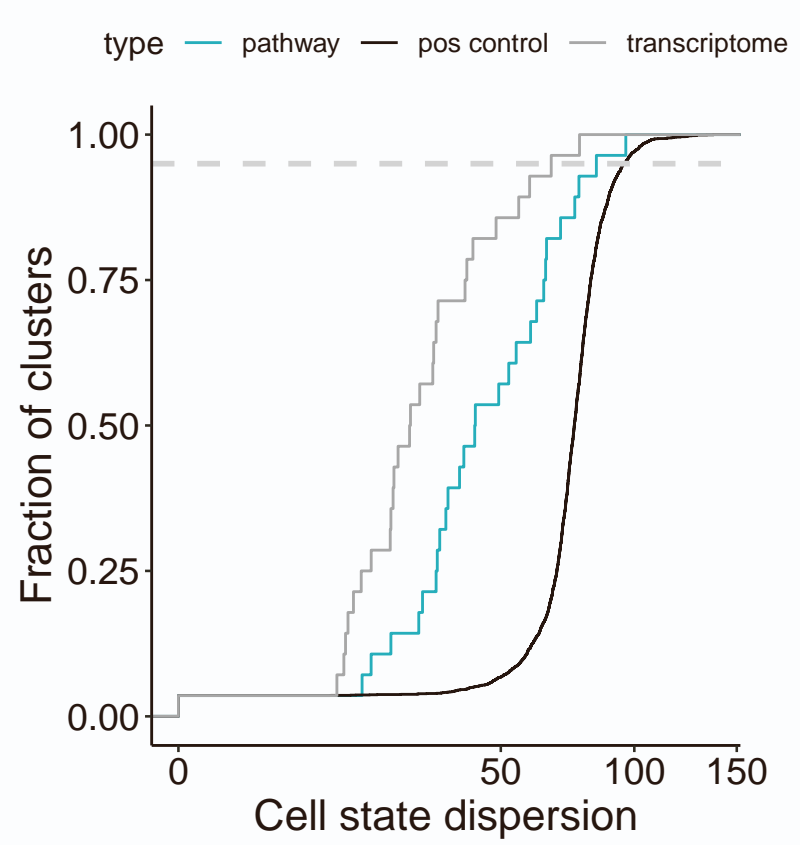

## Profile Dispersion Plot

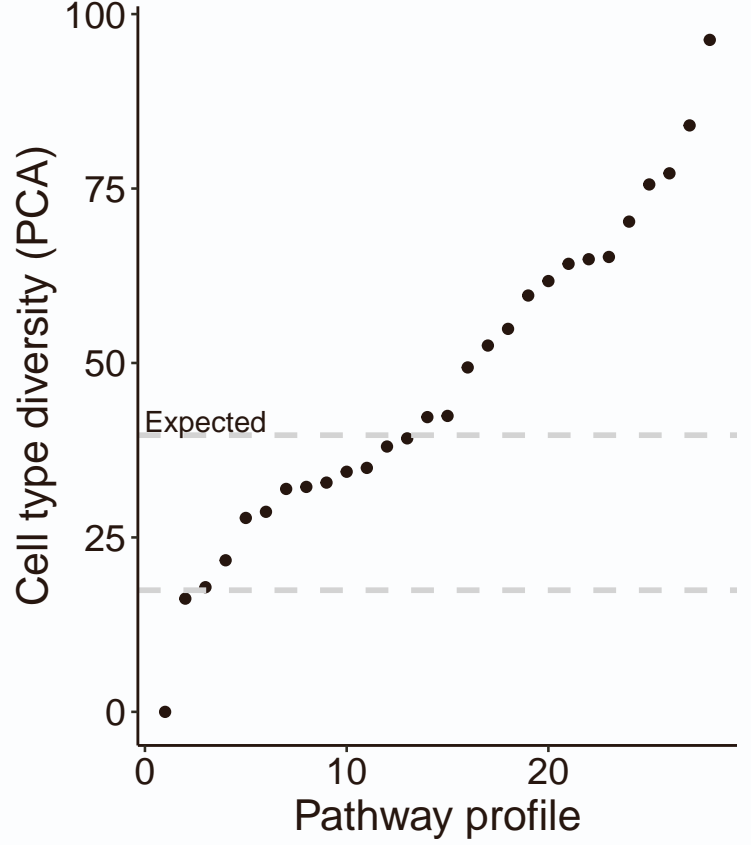

## Motifs, Dispersion $\geq 90^{\text{th}}$ percentile

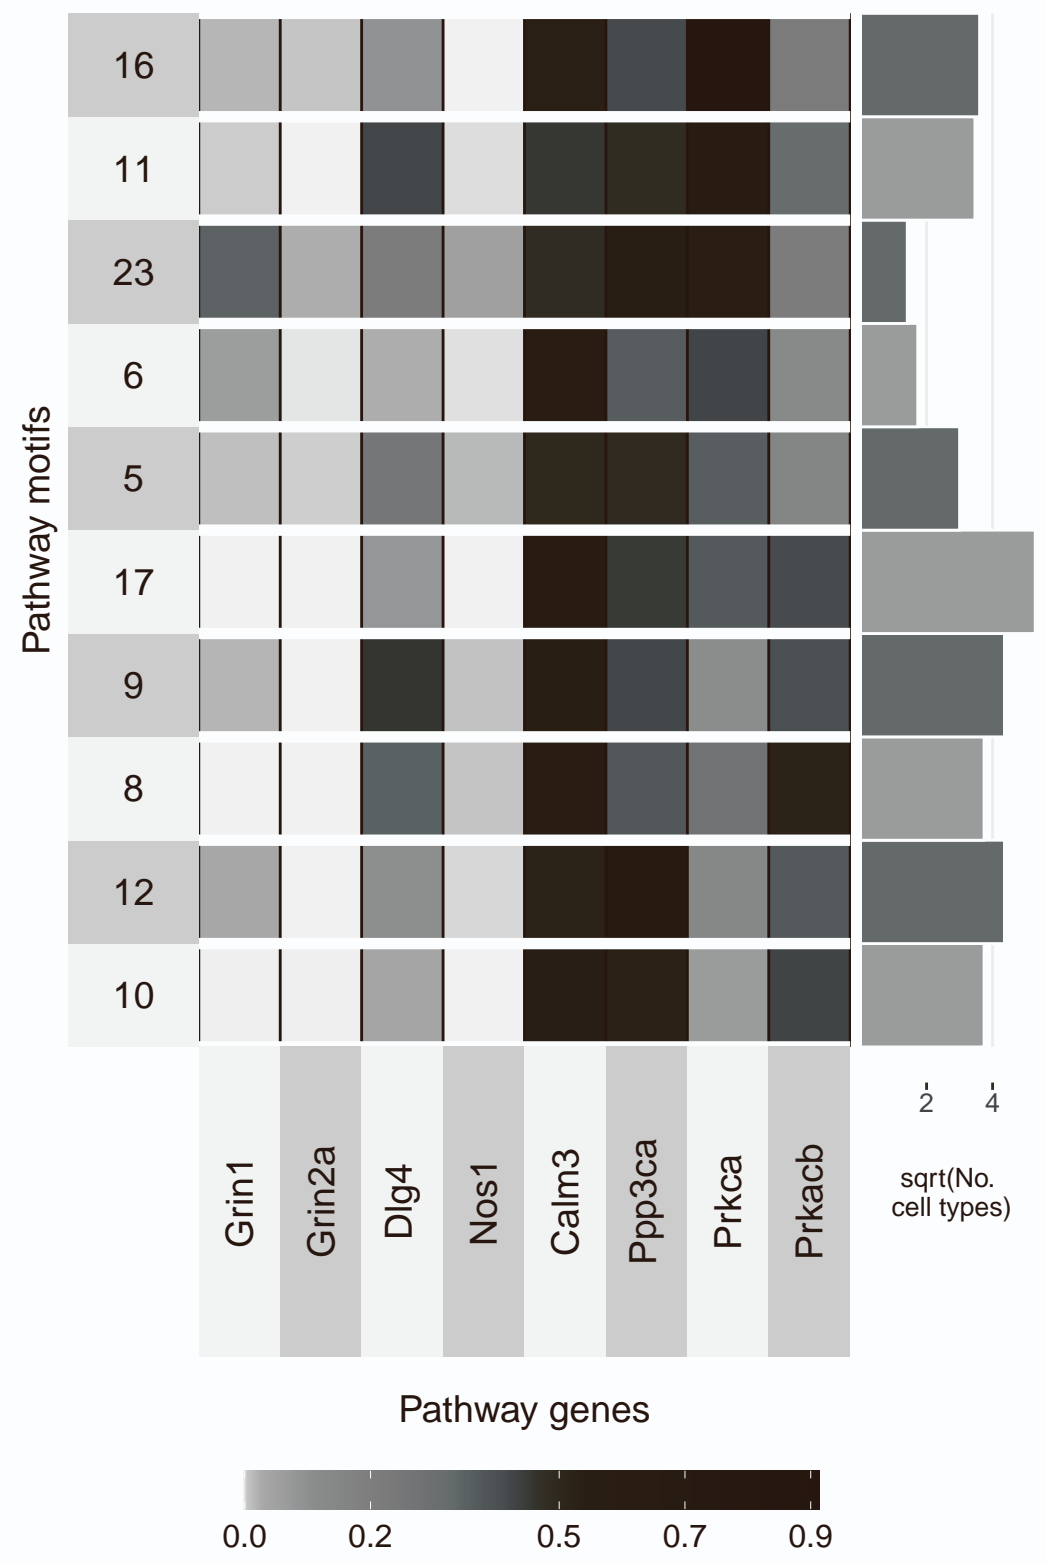

## Motif Tissue Composition

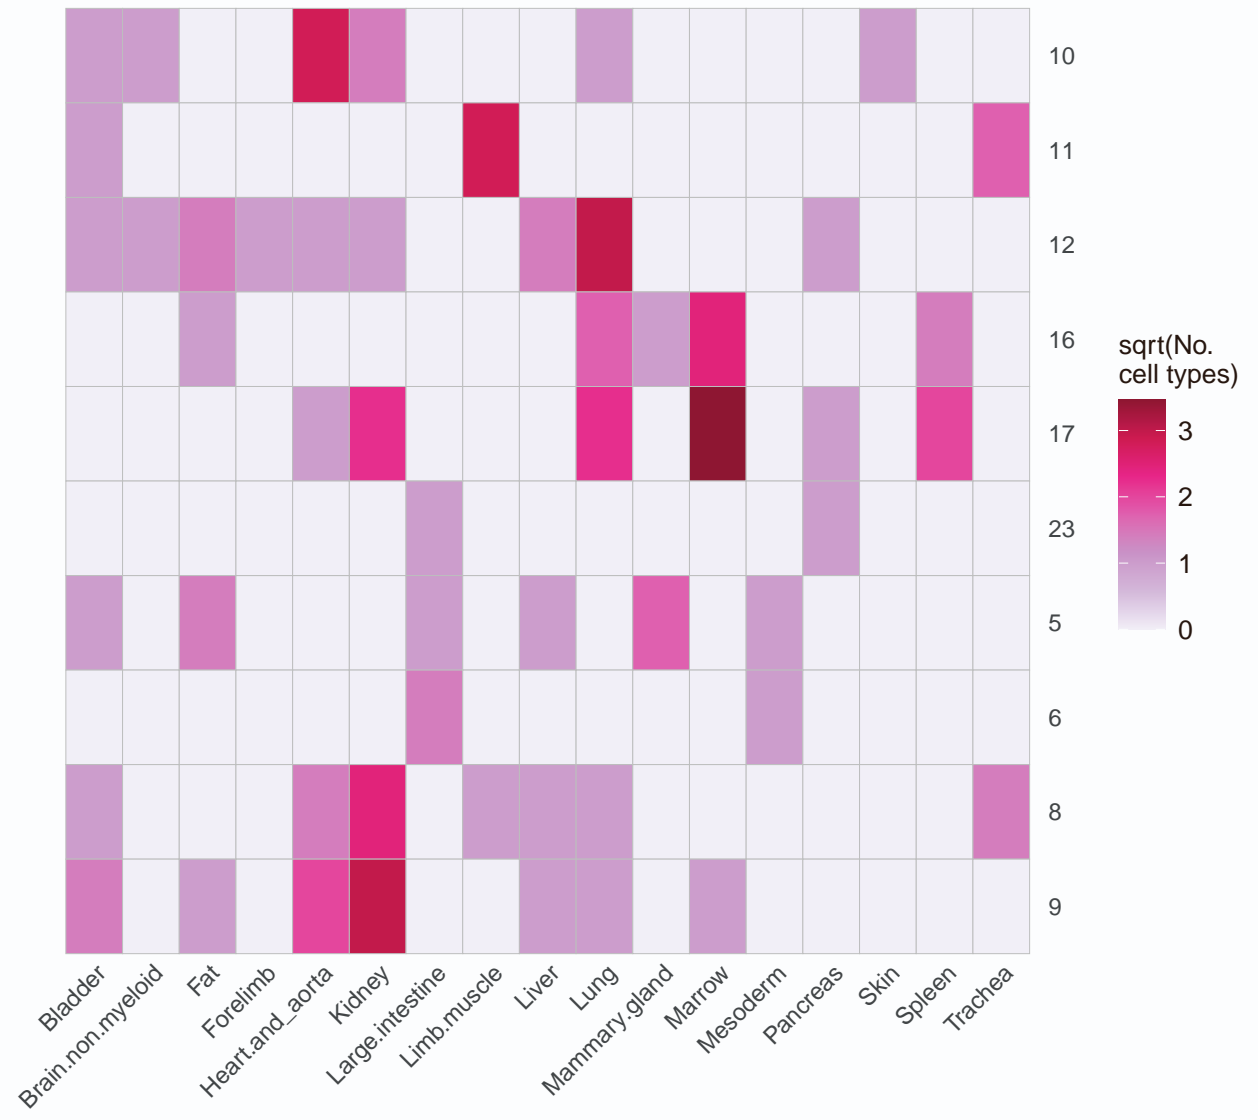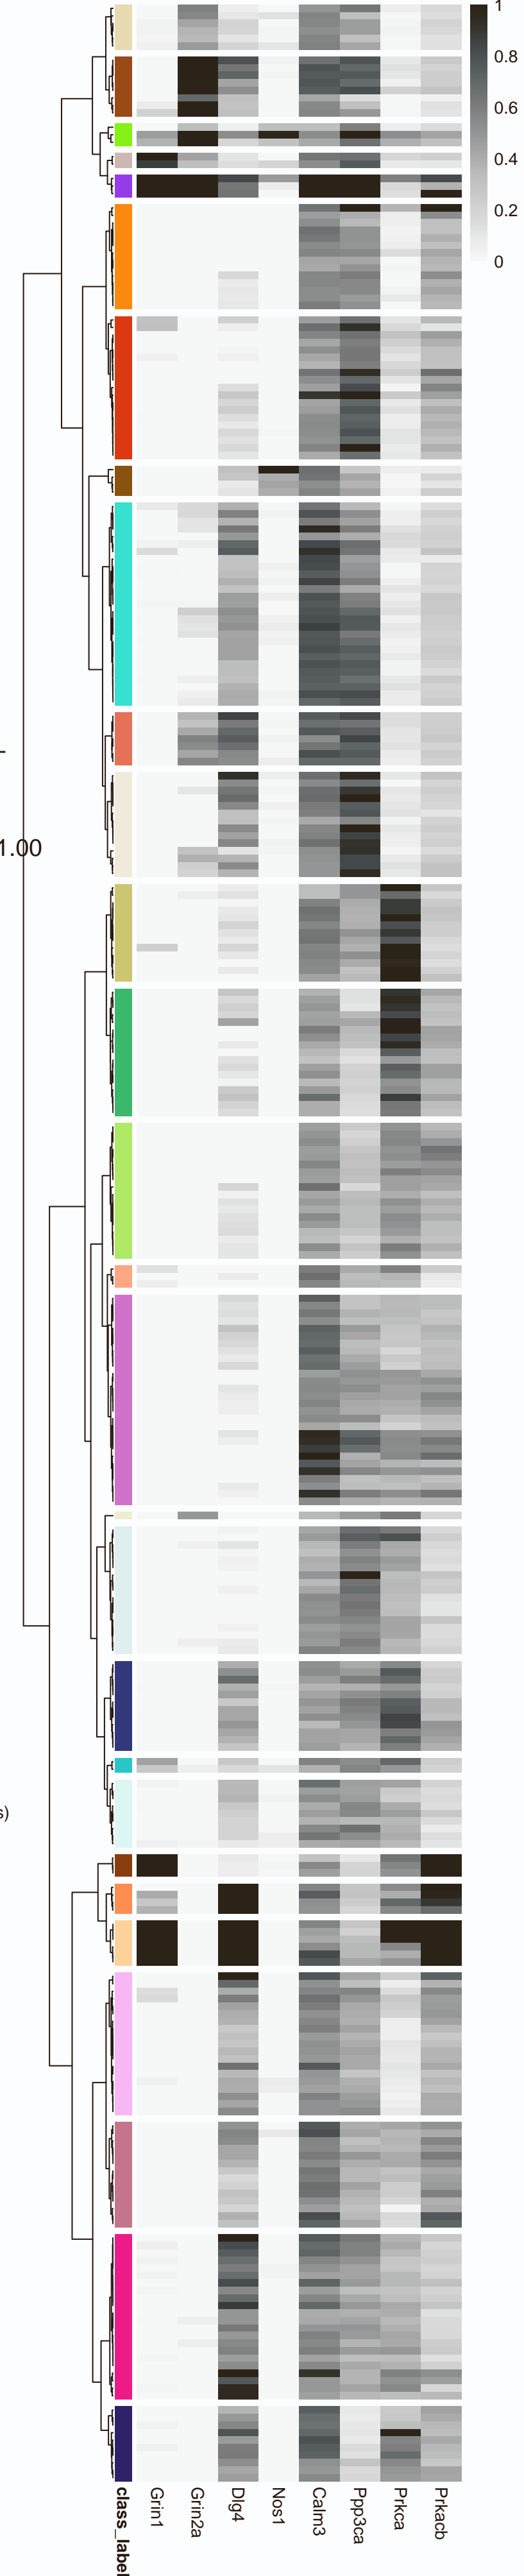



# Nitric Oxide Signaling Pathway (k\_opt = 28)

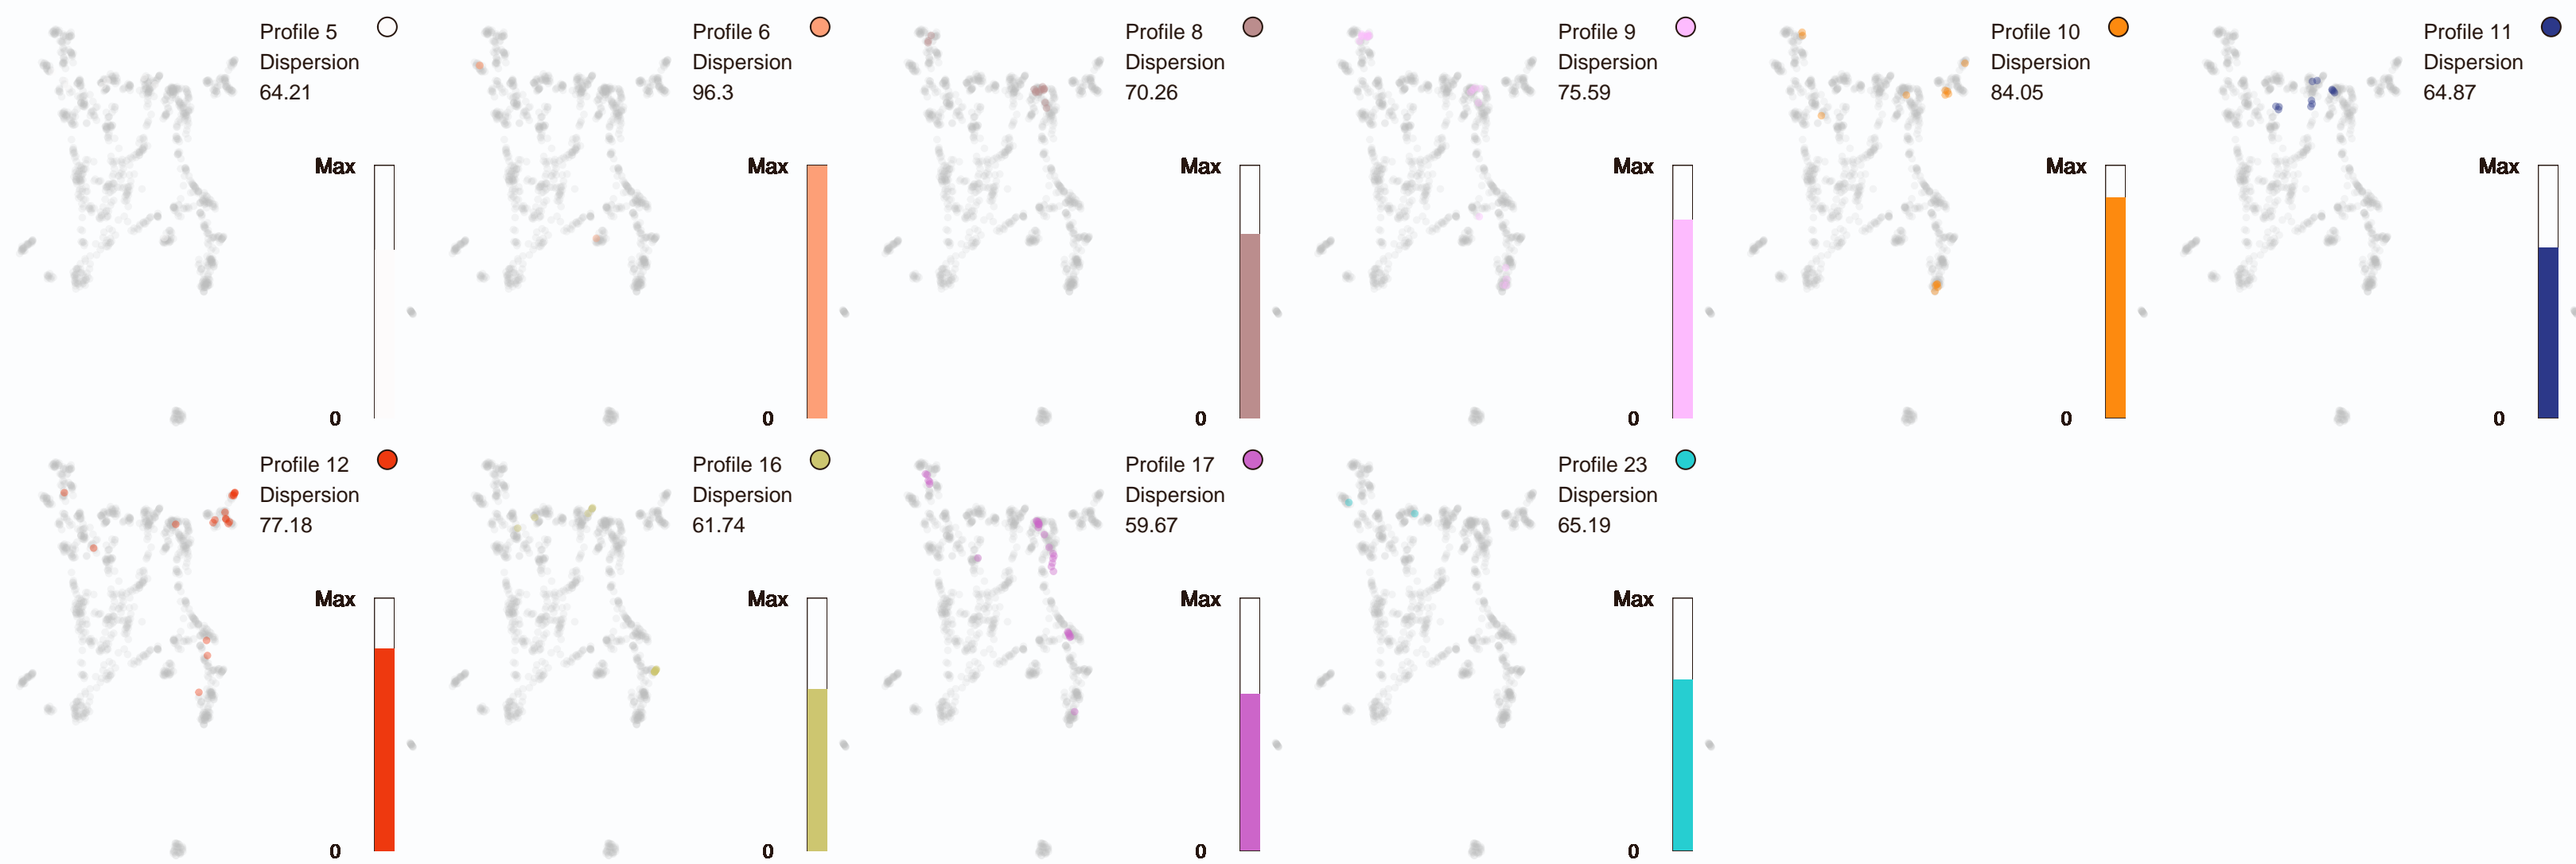

# Notch receptors, Dll ligands and Fringe proteins (k\_opt = 30)

Pathway genes

- Dll1
- Dll3
- Dll4
- Jag1
- Jag2
- Notch1
- Notch2
- Notch3
- Notch4
- Mfng
- Rfng
- Lfng

## Gene Co-Expression Above Threshold

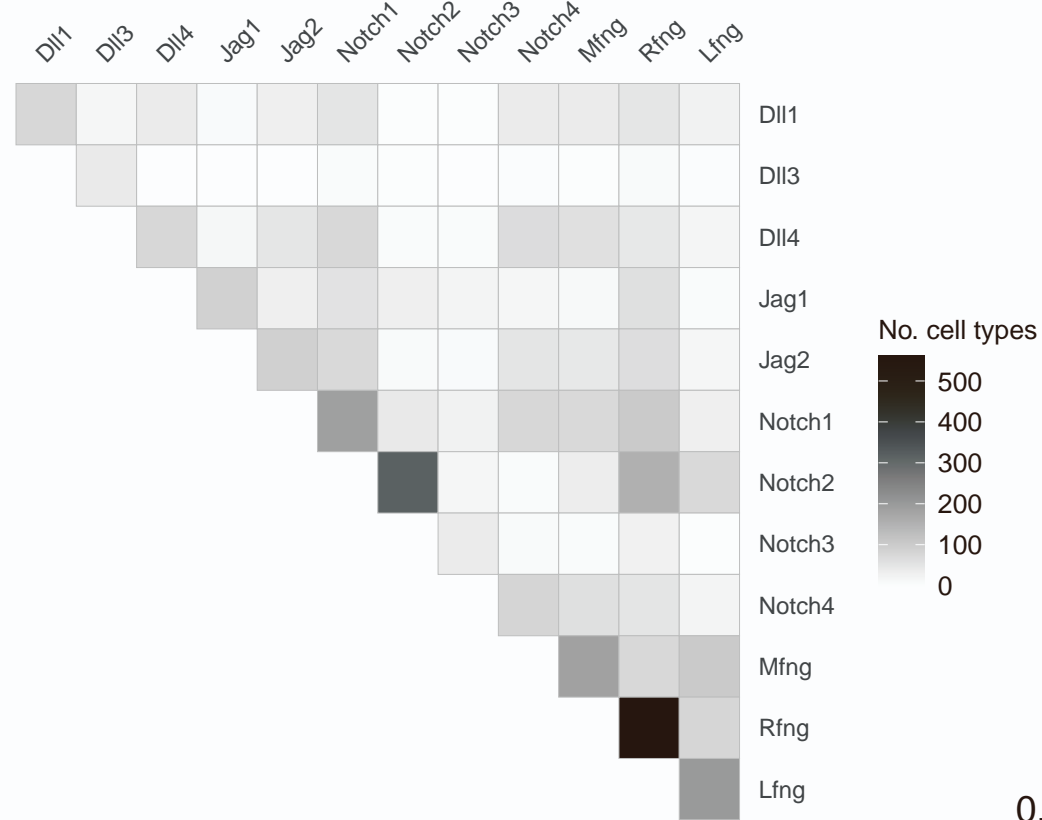

## Silhouette and Z-score

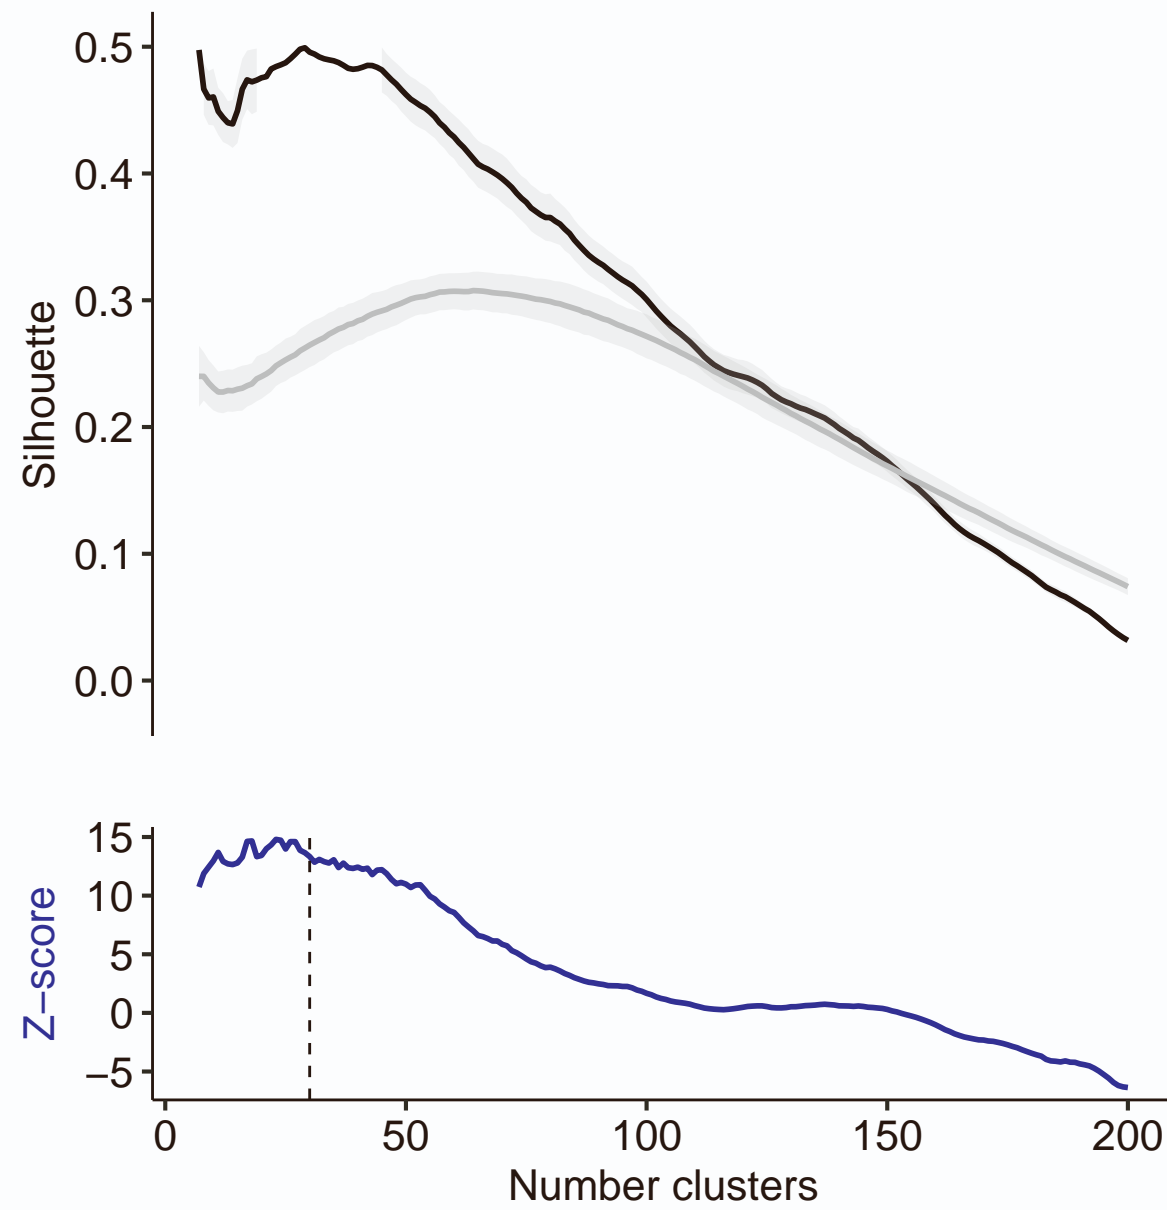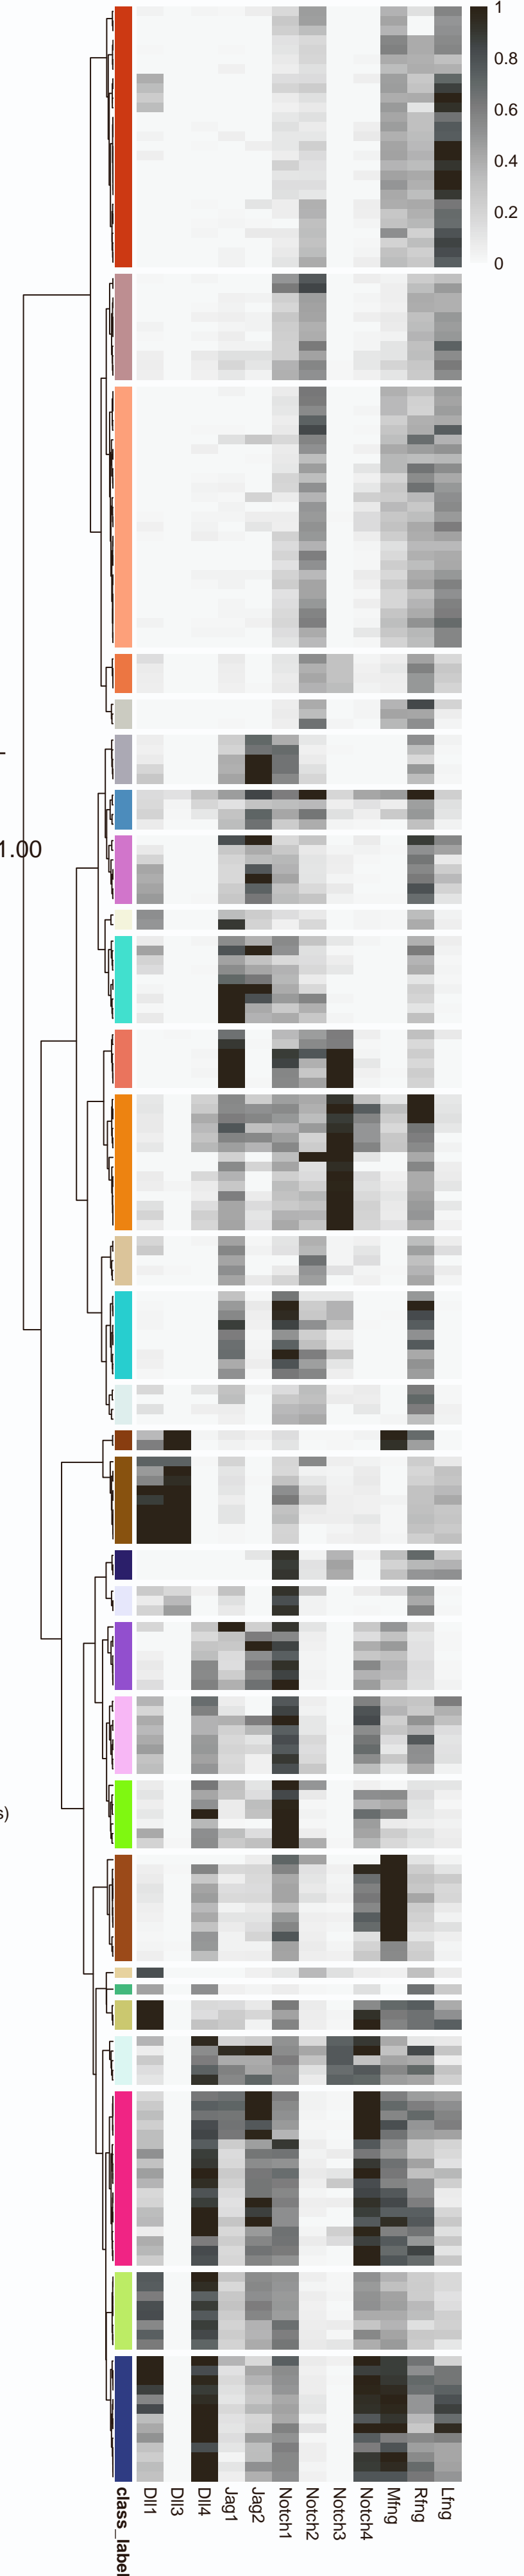

## Global UMAP: Pathway ON

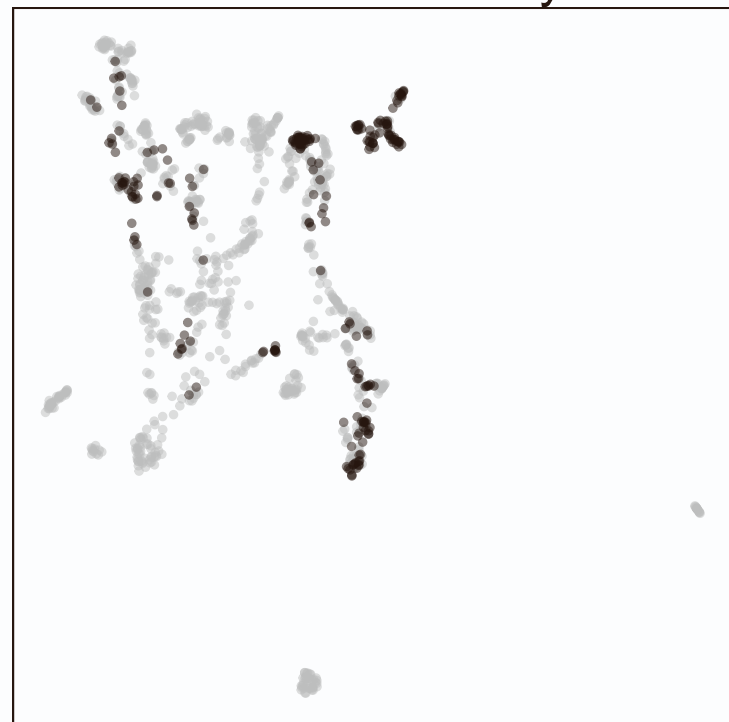

## ECDF of Profile Dispersions

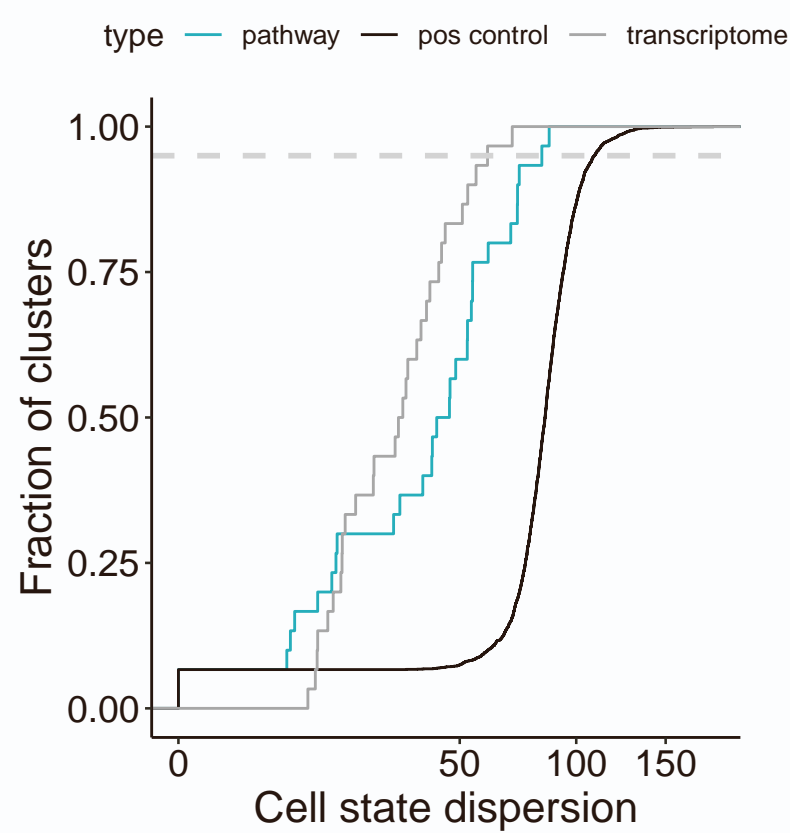

## Profile Dispersion Plot

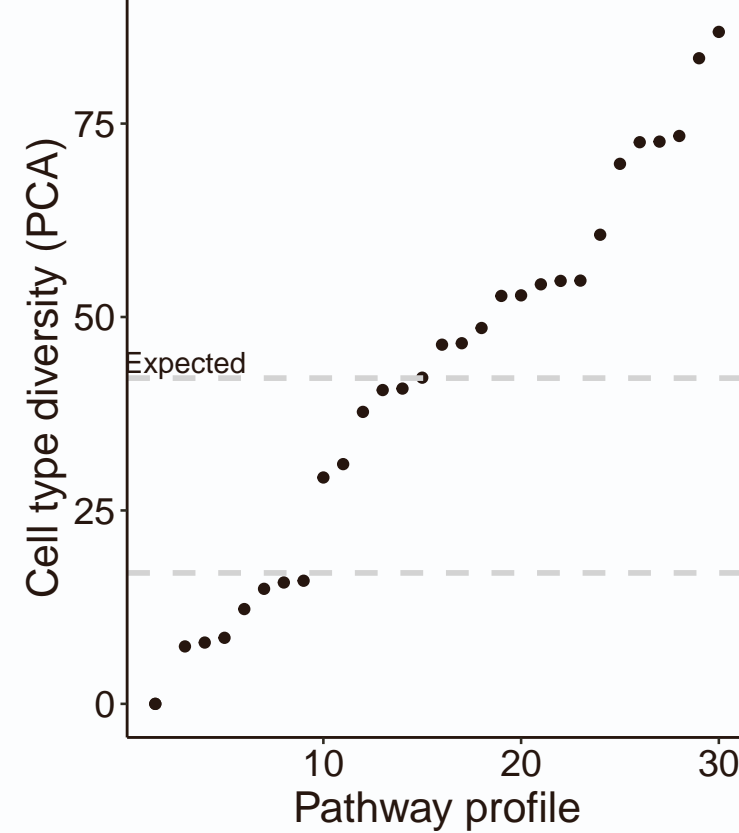

## Motifs, Dispersion $\geq 90^{\text{th}}$ percentile

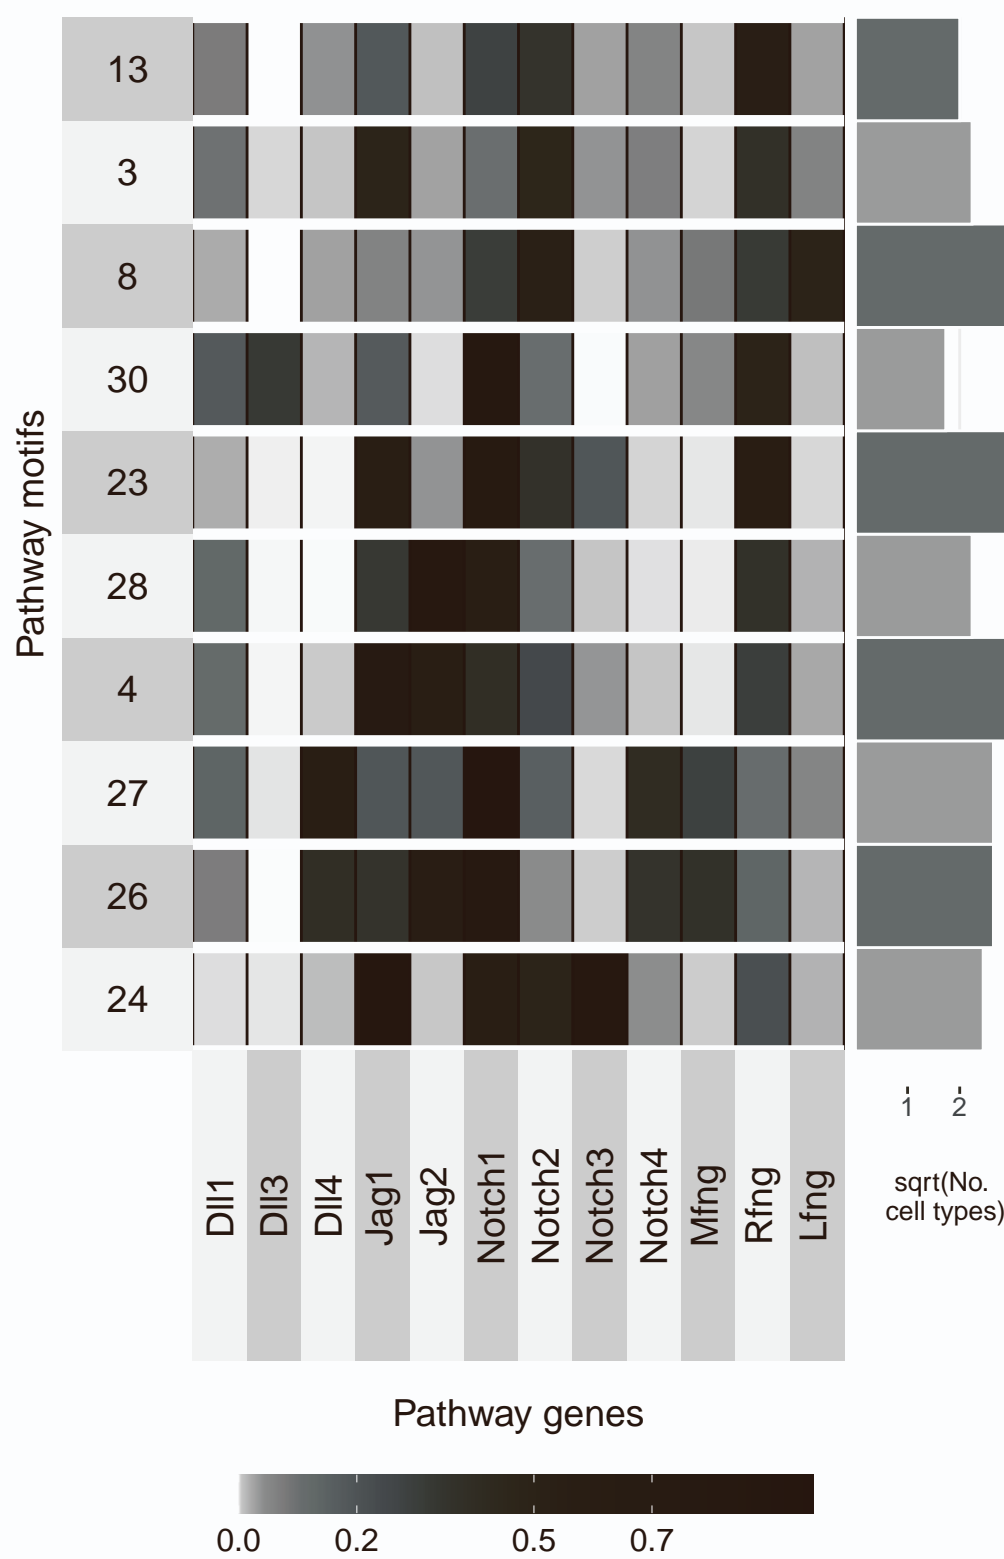

## Motif Tissue Composition

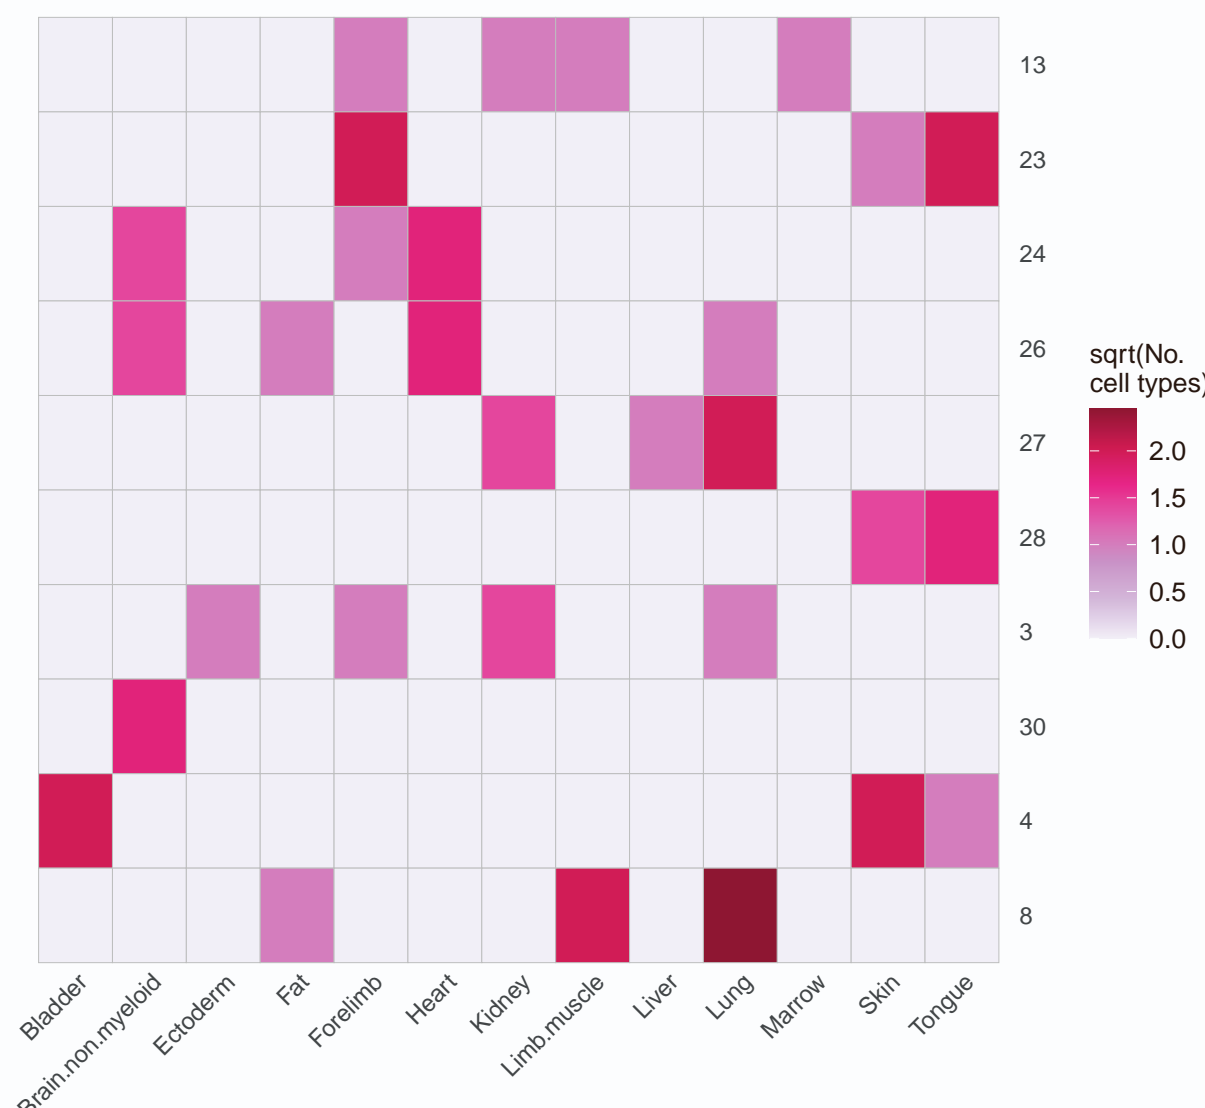

# Notch receptors, Dll ligands and Fringe proteins (k\_opt = 30)

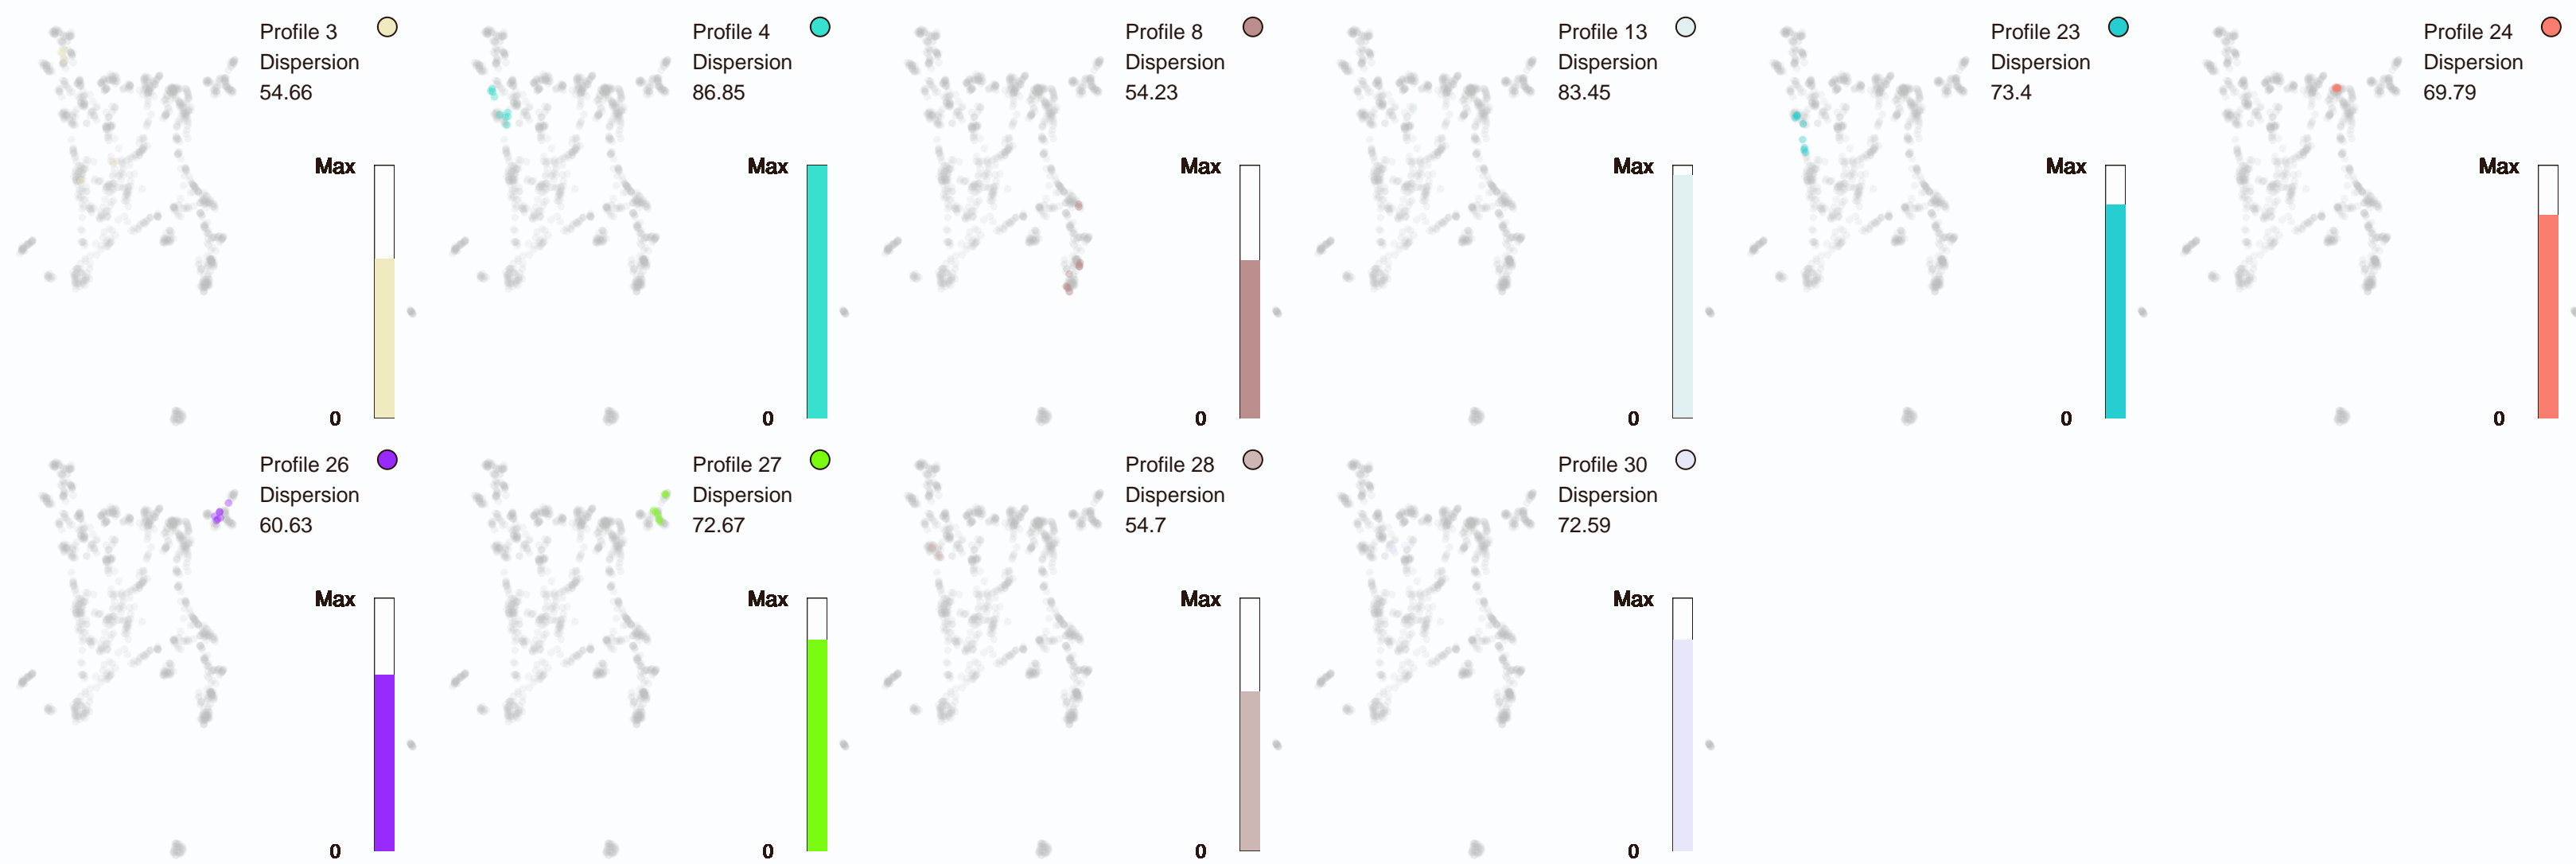

# Ras Signaling Pathway (k\_opt = 83)

Pathway genes

|        |       |        |
|--------|-------|--------|
| Pik3ca | Bad   | Chuk   |
| Ralgsd | Apaf1 | Bcl2l1 |
| Rala   | Casp9 | Pld1   |
| Ralbp1 | Cyts  | Raf1   |
| Cdc42  | Foxo4 | Map2k1 |
| Rac1   | Smad3 | Mapk3  |
| Akt1   | Smad4 | Elk1   |
| Vav3   |       |        |

## Gene Co-Expression Above Threshold

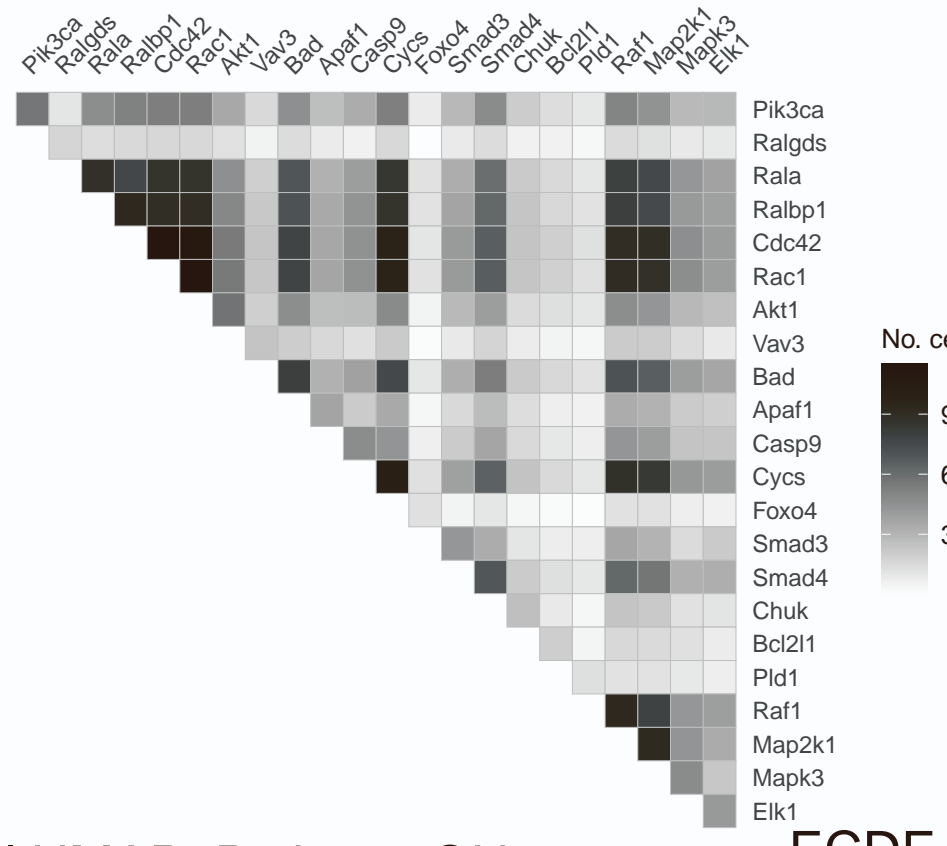

## Silhouette and Z-score

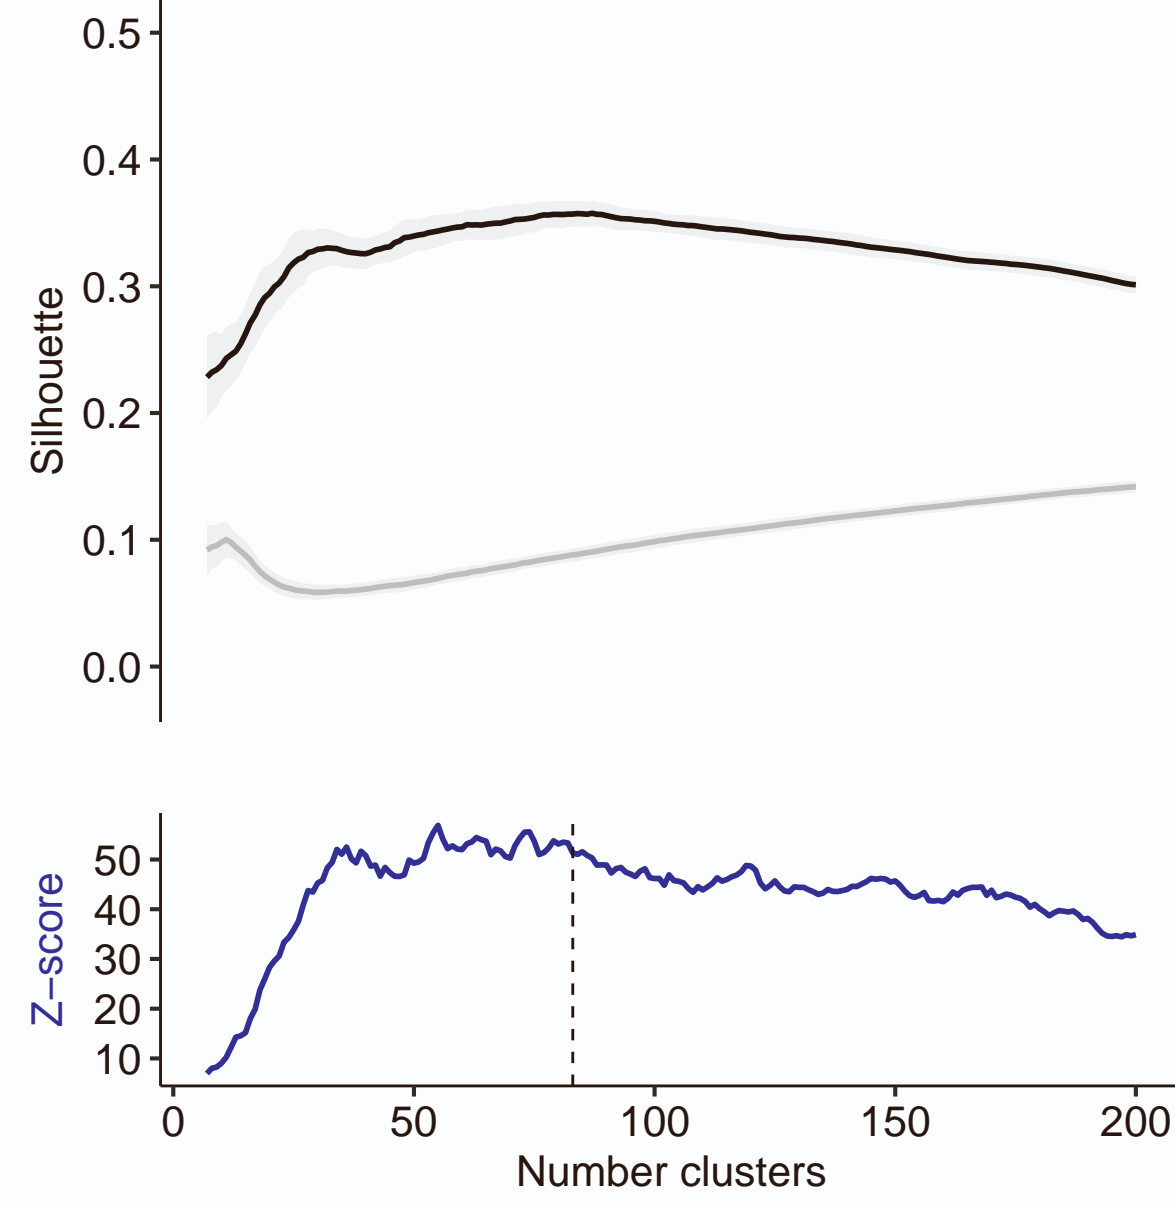

## Global UMAP: Pathway ON

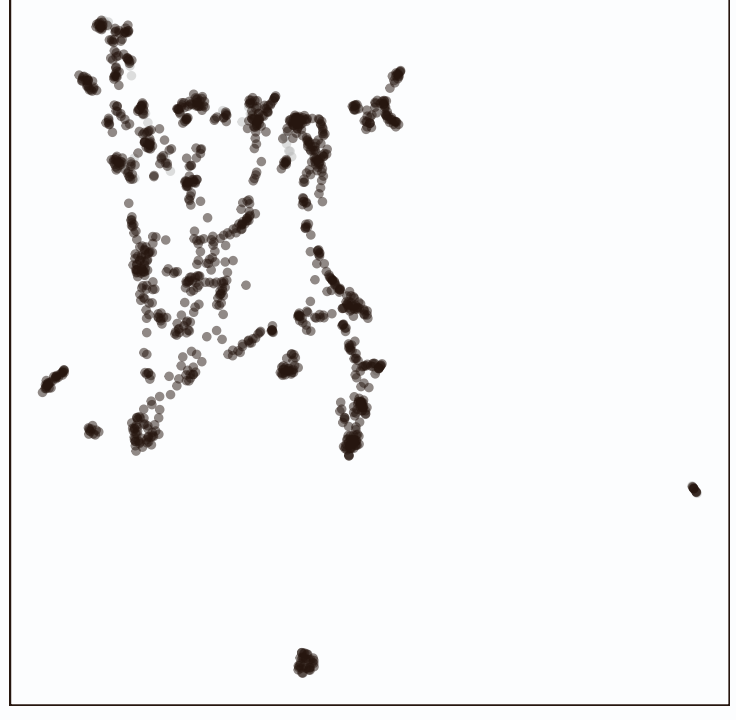

## ECDF of Profile Dispersions

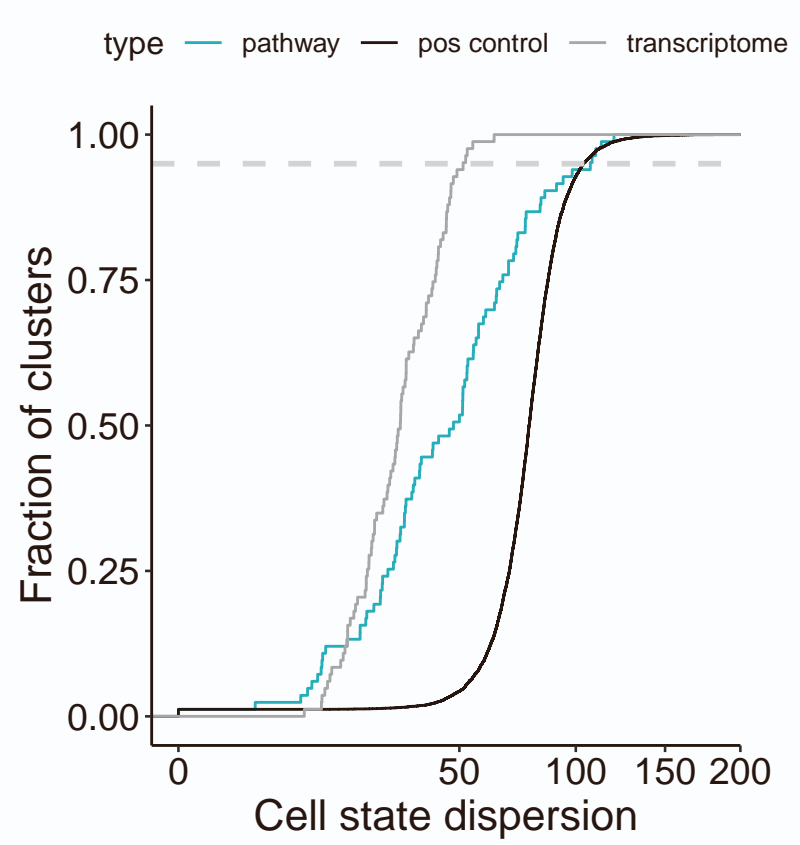

## Profile Dispersion Plot

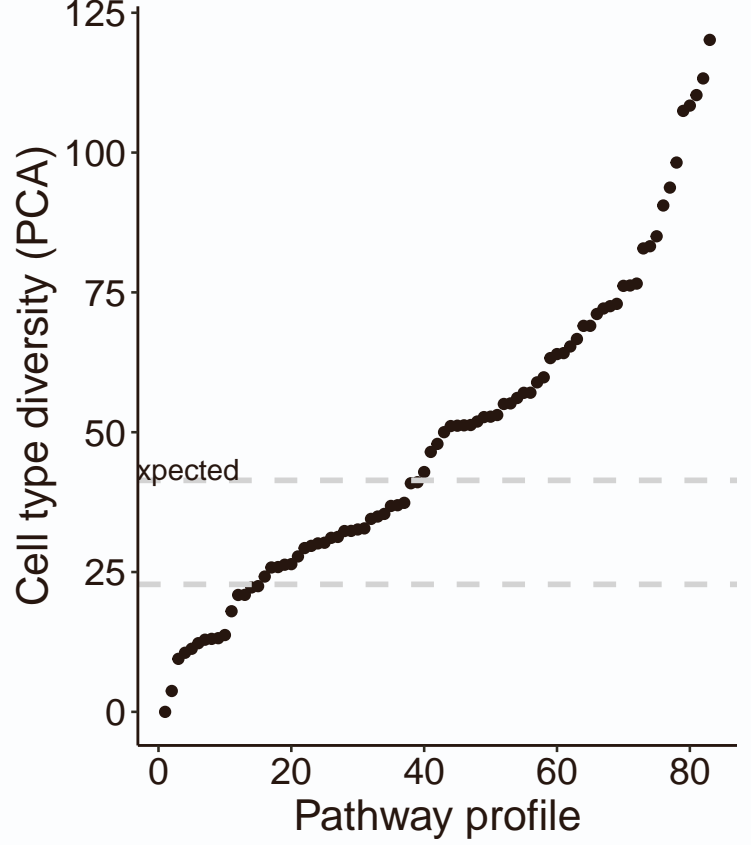

## Motifs, Dispersion $\geq 90^{\text{th}}$ percentile

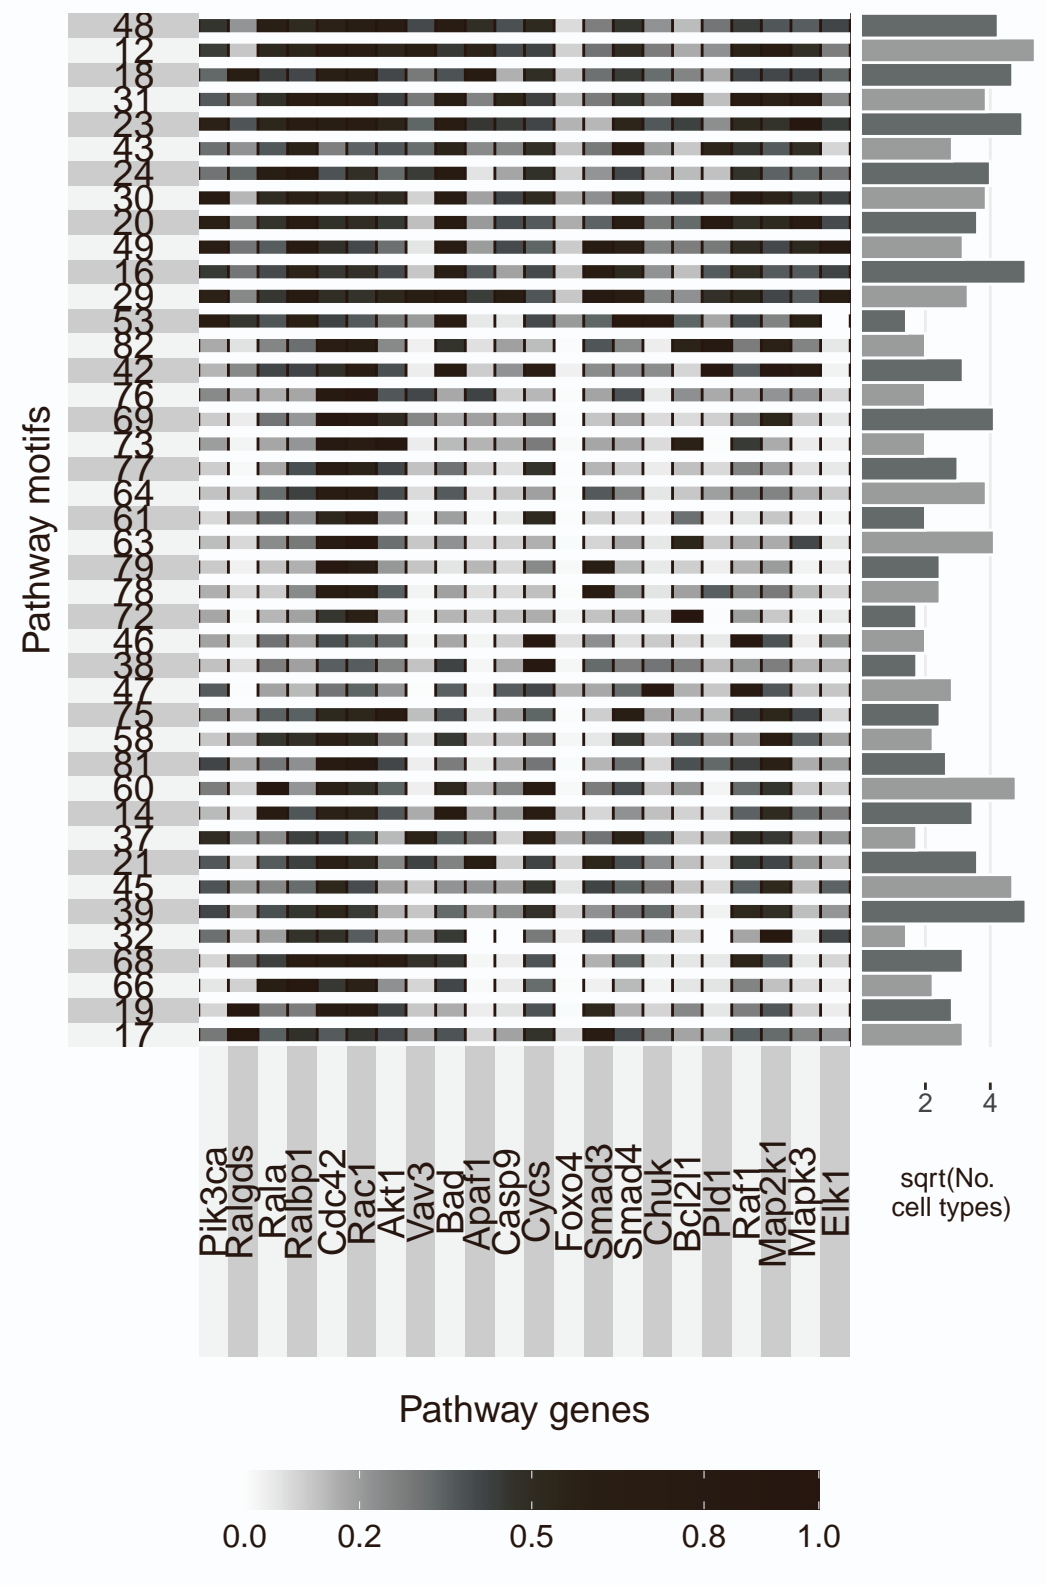

## Motif Tissue Composition

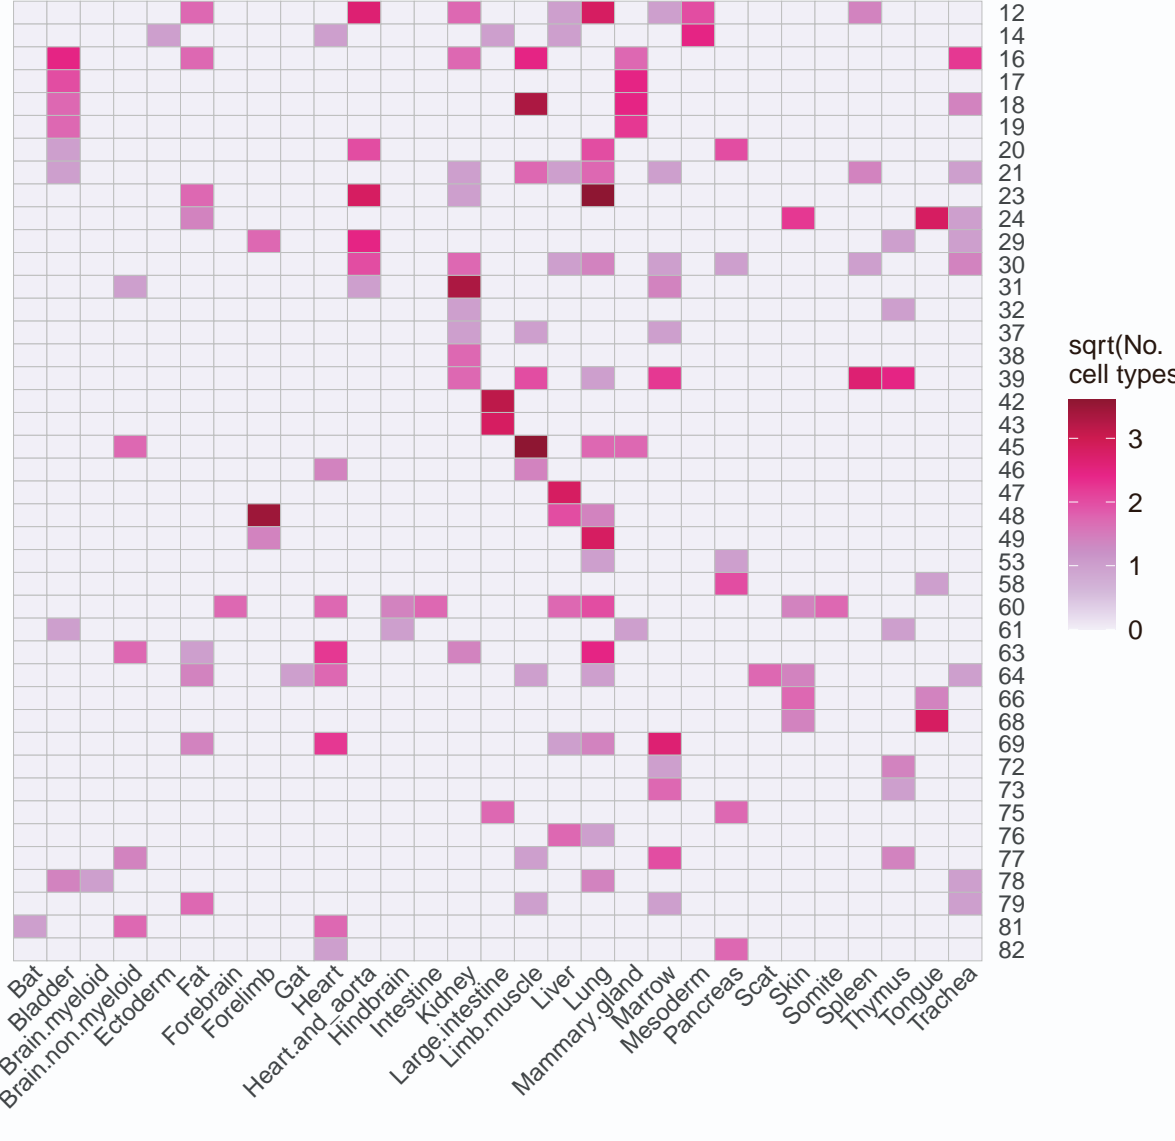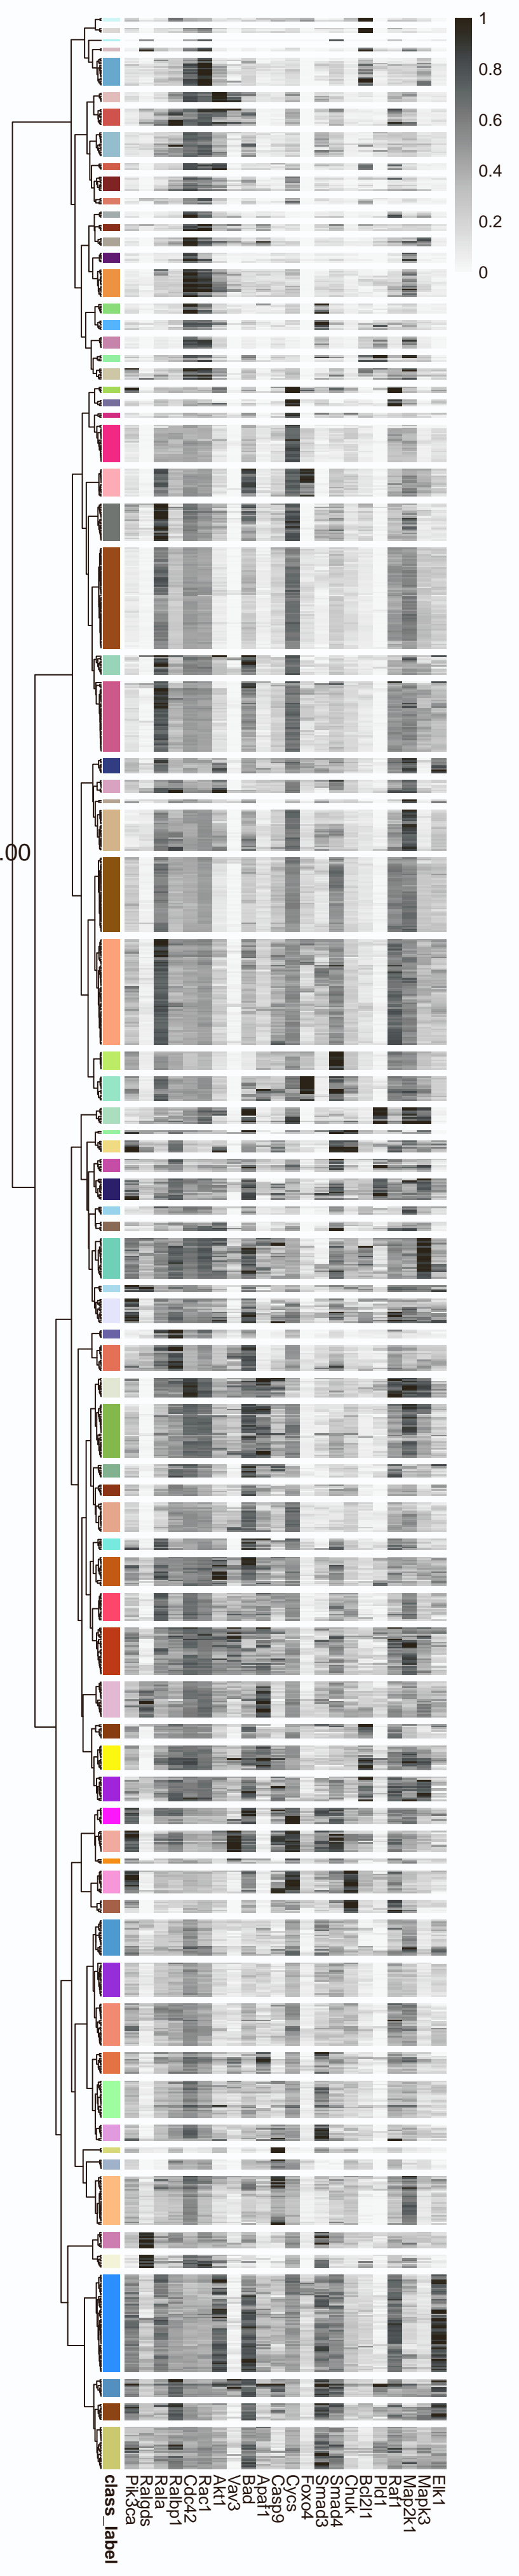

# Ras Signaling Pathway (k\_opt = 83)

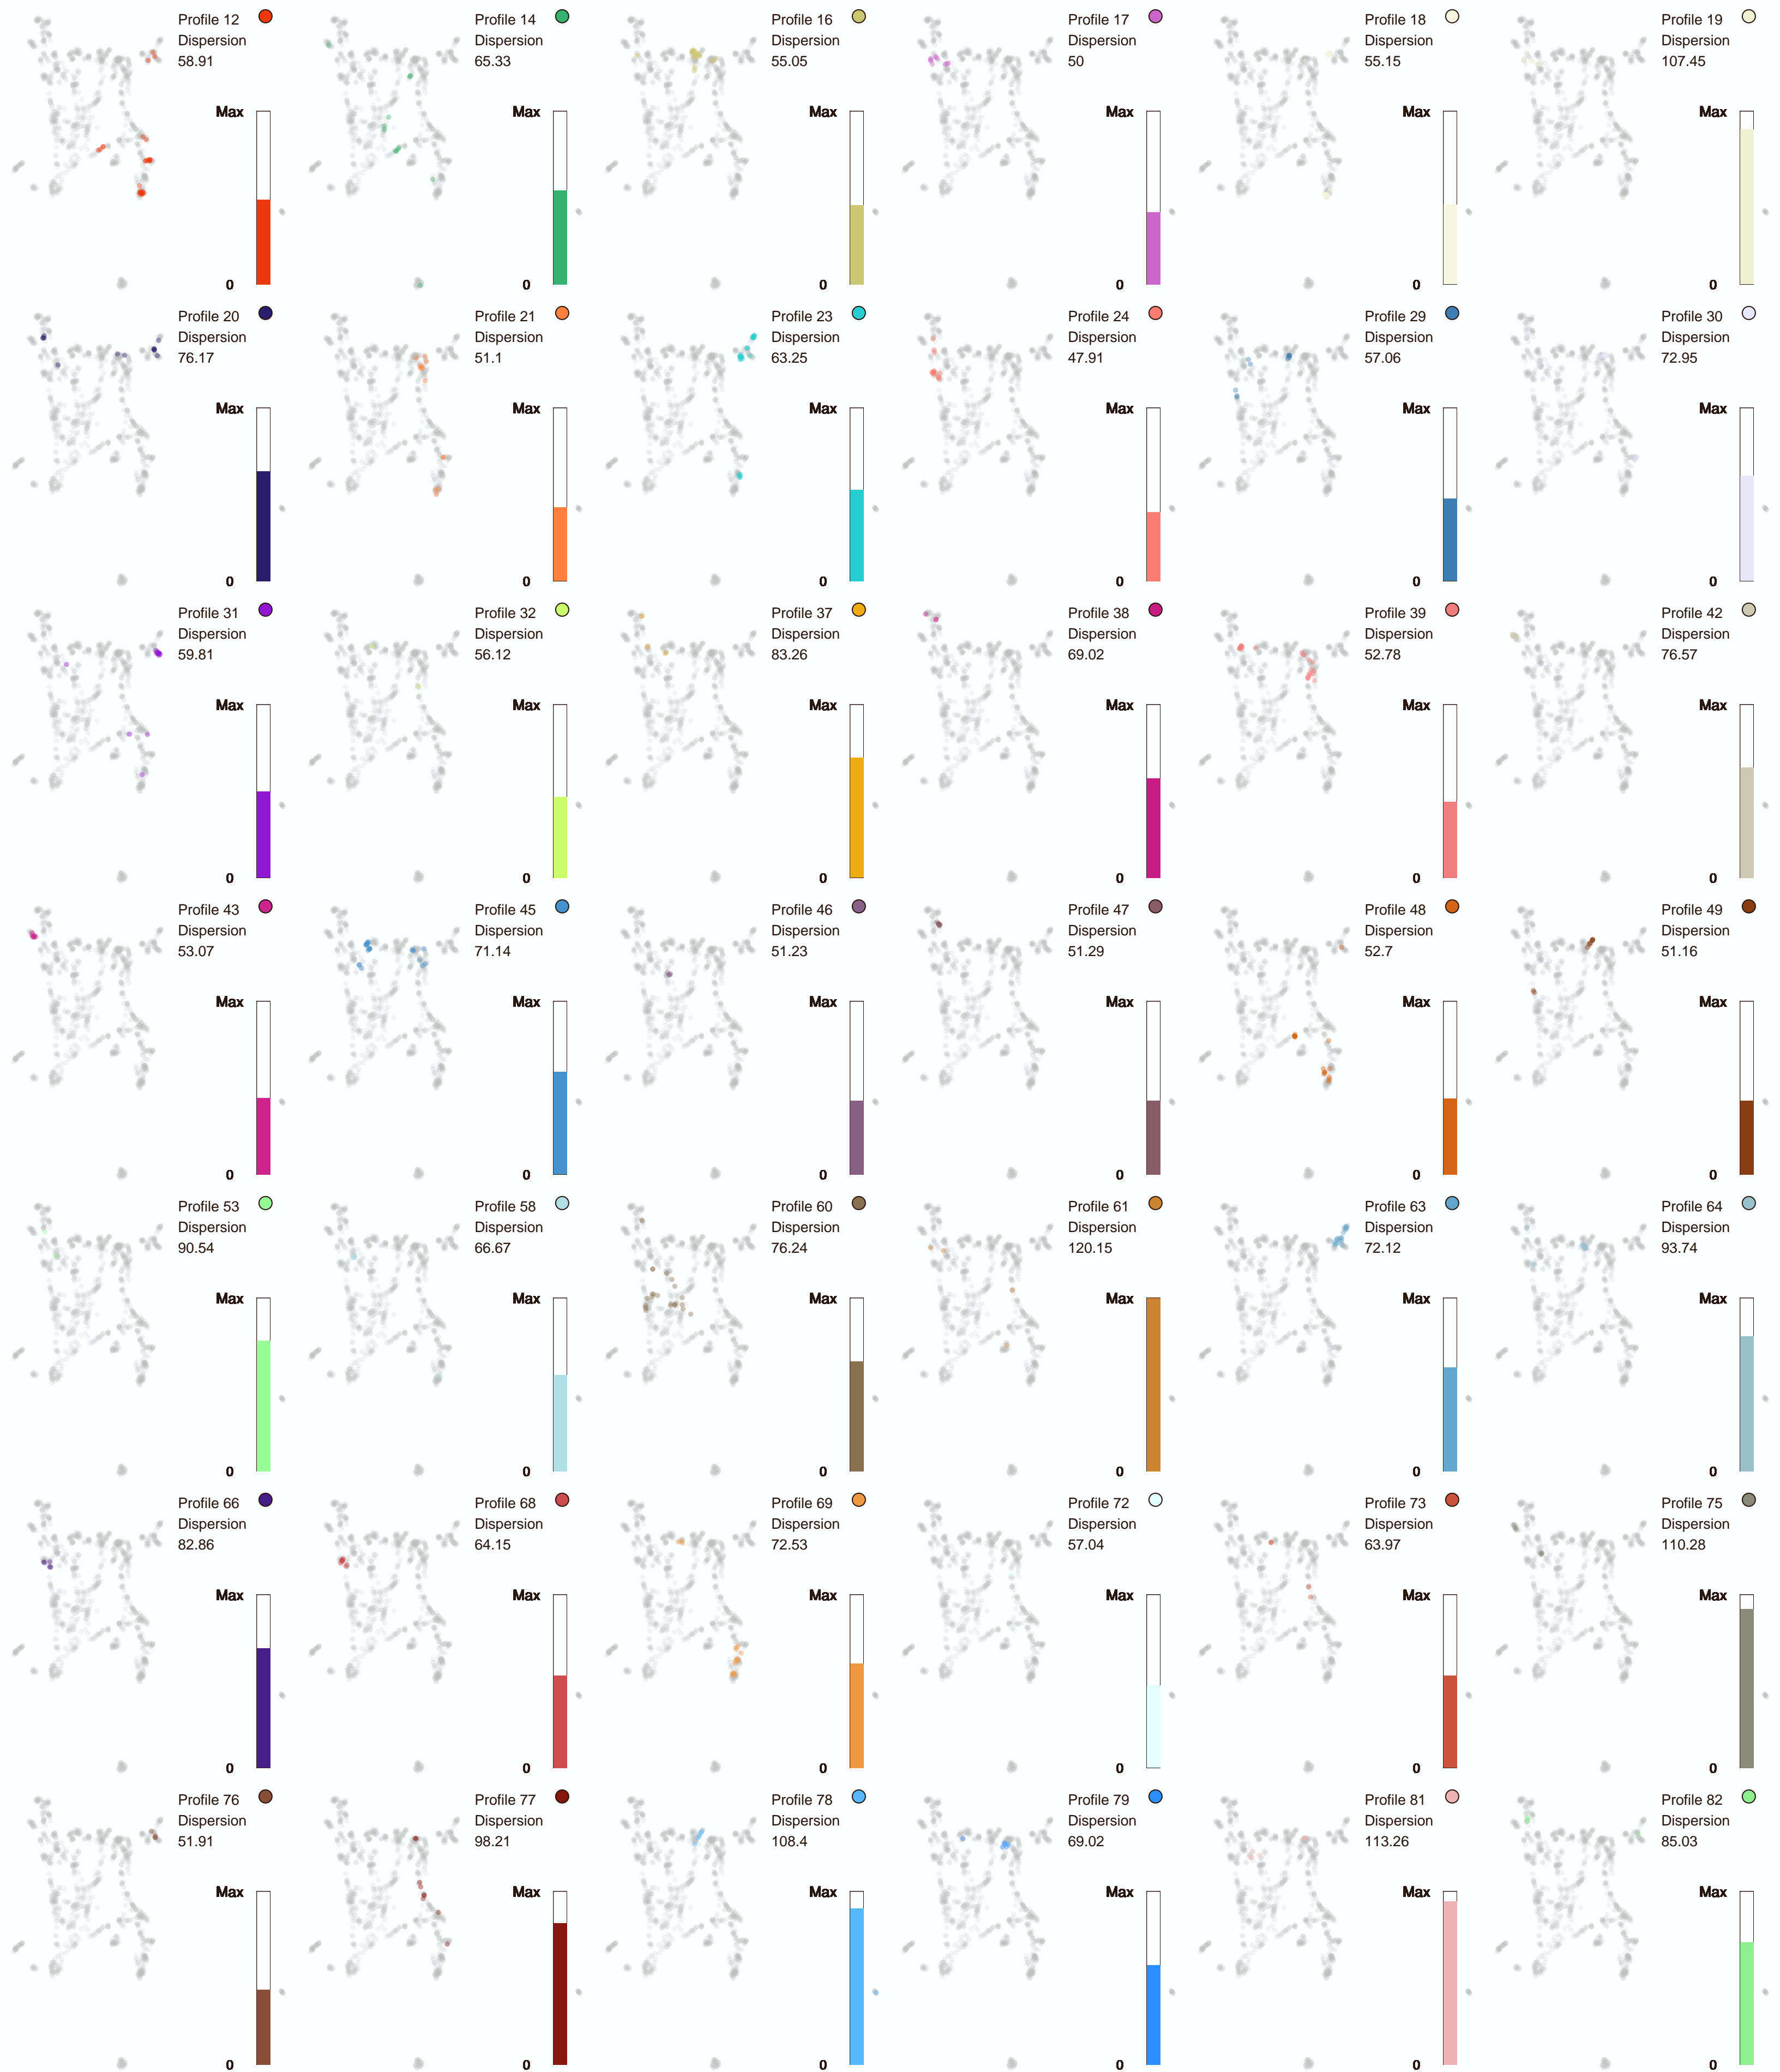

# RNA-splicing by SR protein family (k\_opt = 19)

Srsf1  
Srsf10  
Srsf11  
Srsf12

Pathway genes  
Srsf2  
Srsf3  
Srsf4

Srsf5  
Srsf6  
Srsf7  
Srsf9

## Gene Co-Expression Above Threshold

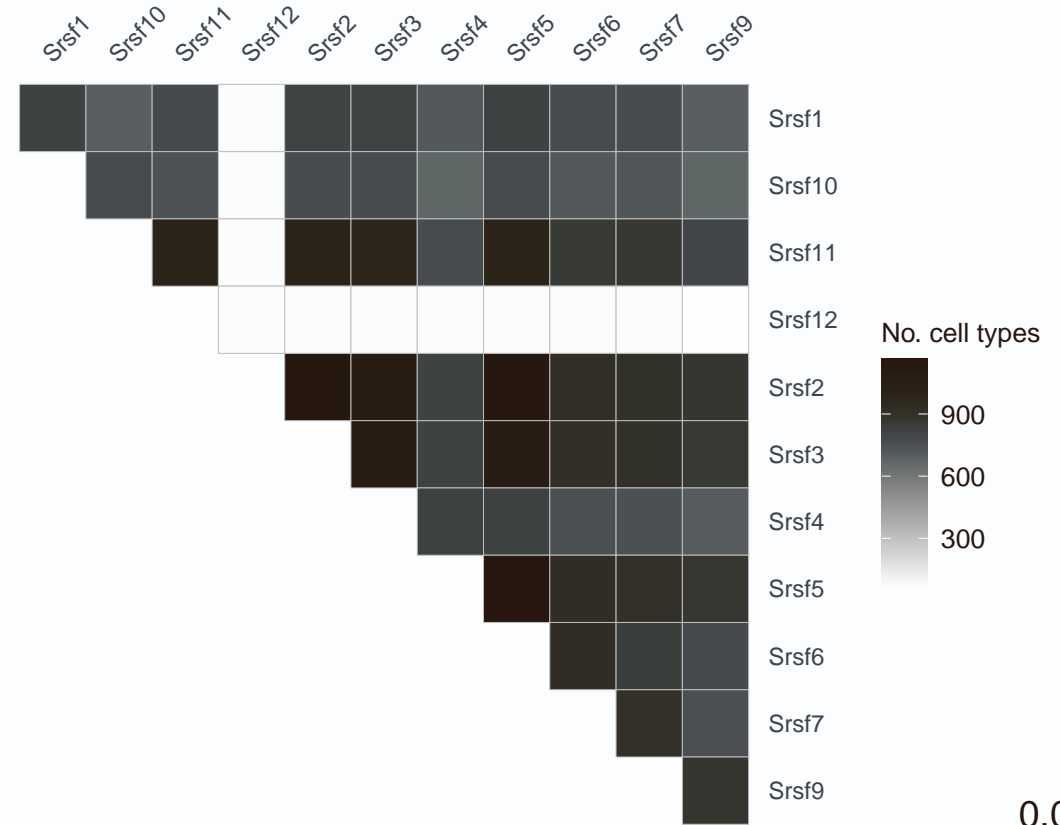

## Silhouette and Z-score

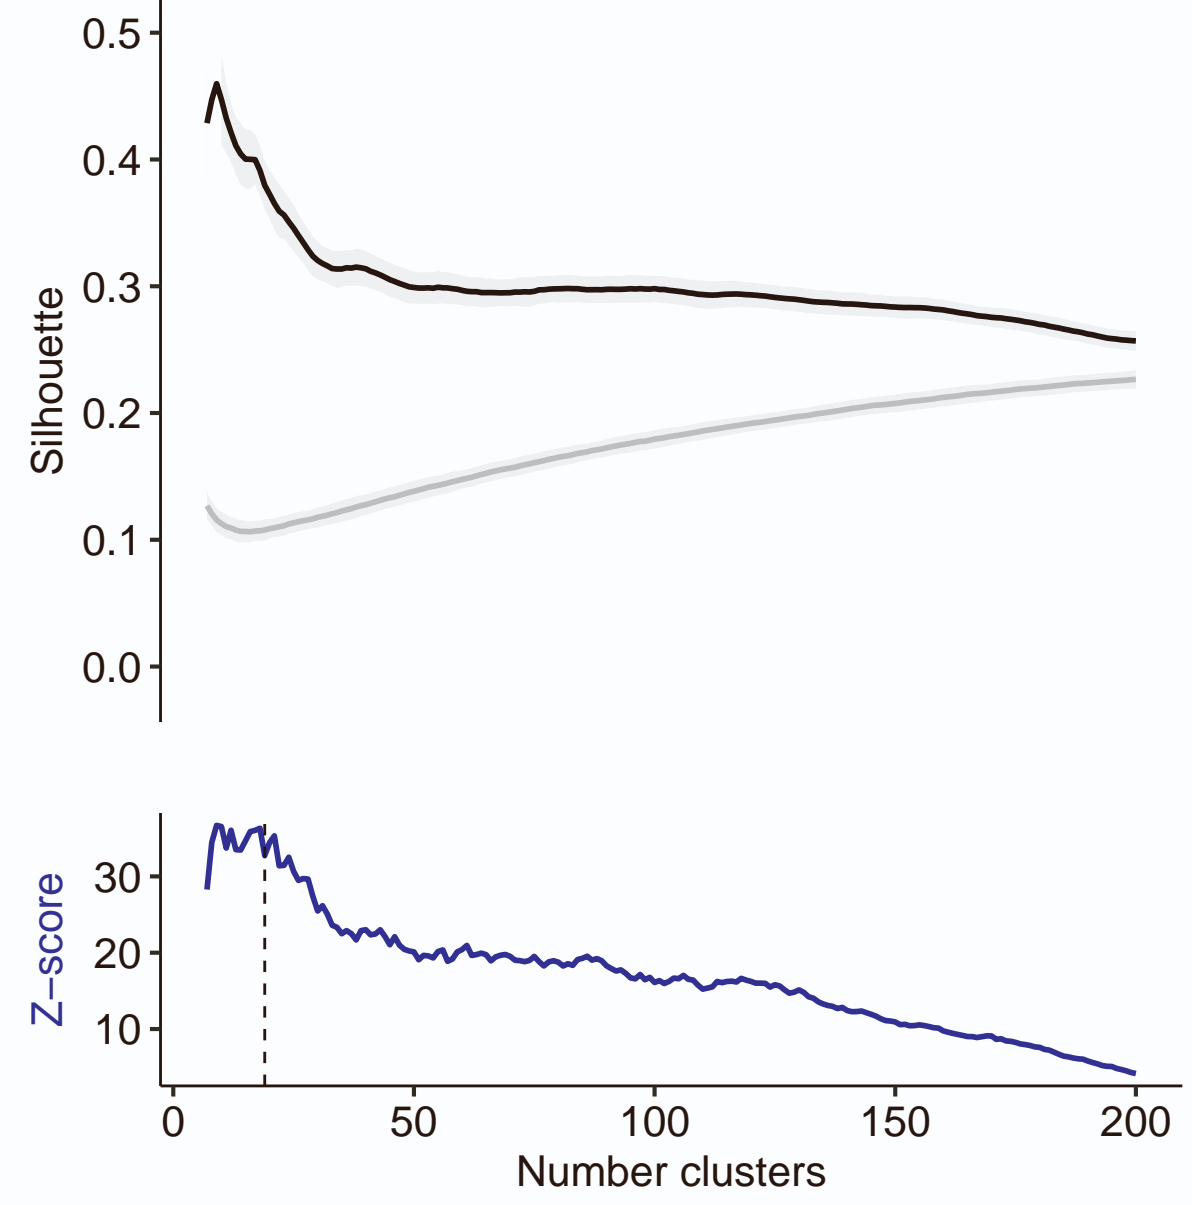

## Global UMAP: Pathway ON

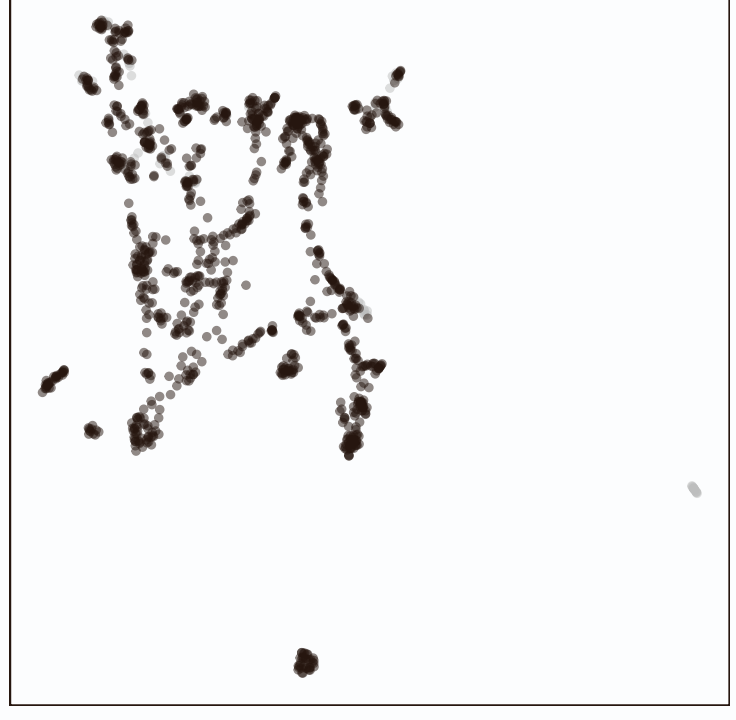

## ECDF of Profile Dispersions

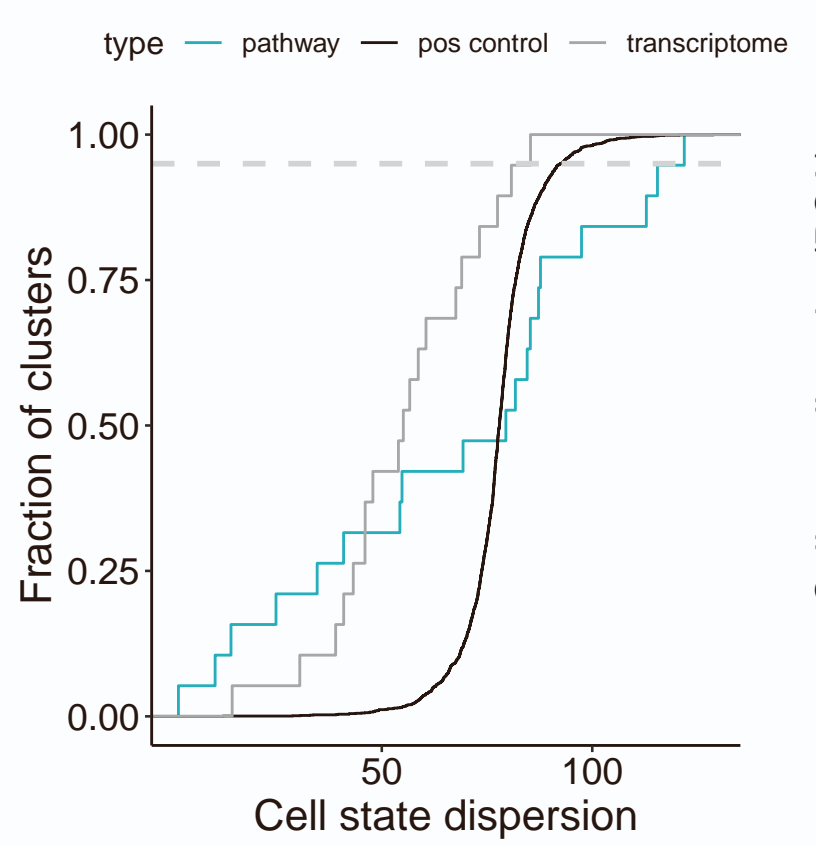

## Profile Dispersion Plot

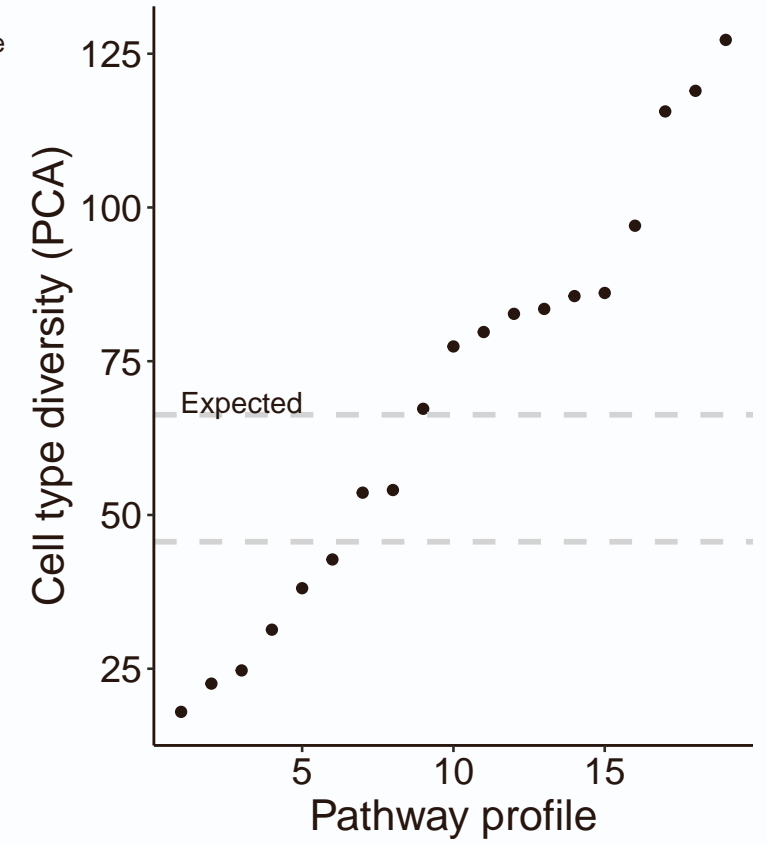

## Motifs, Dispersion $\geq 90^{\text{th}}$ percentile

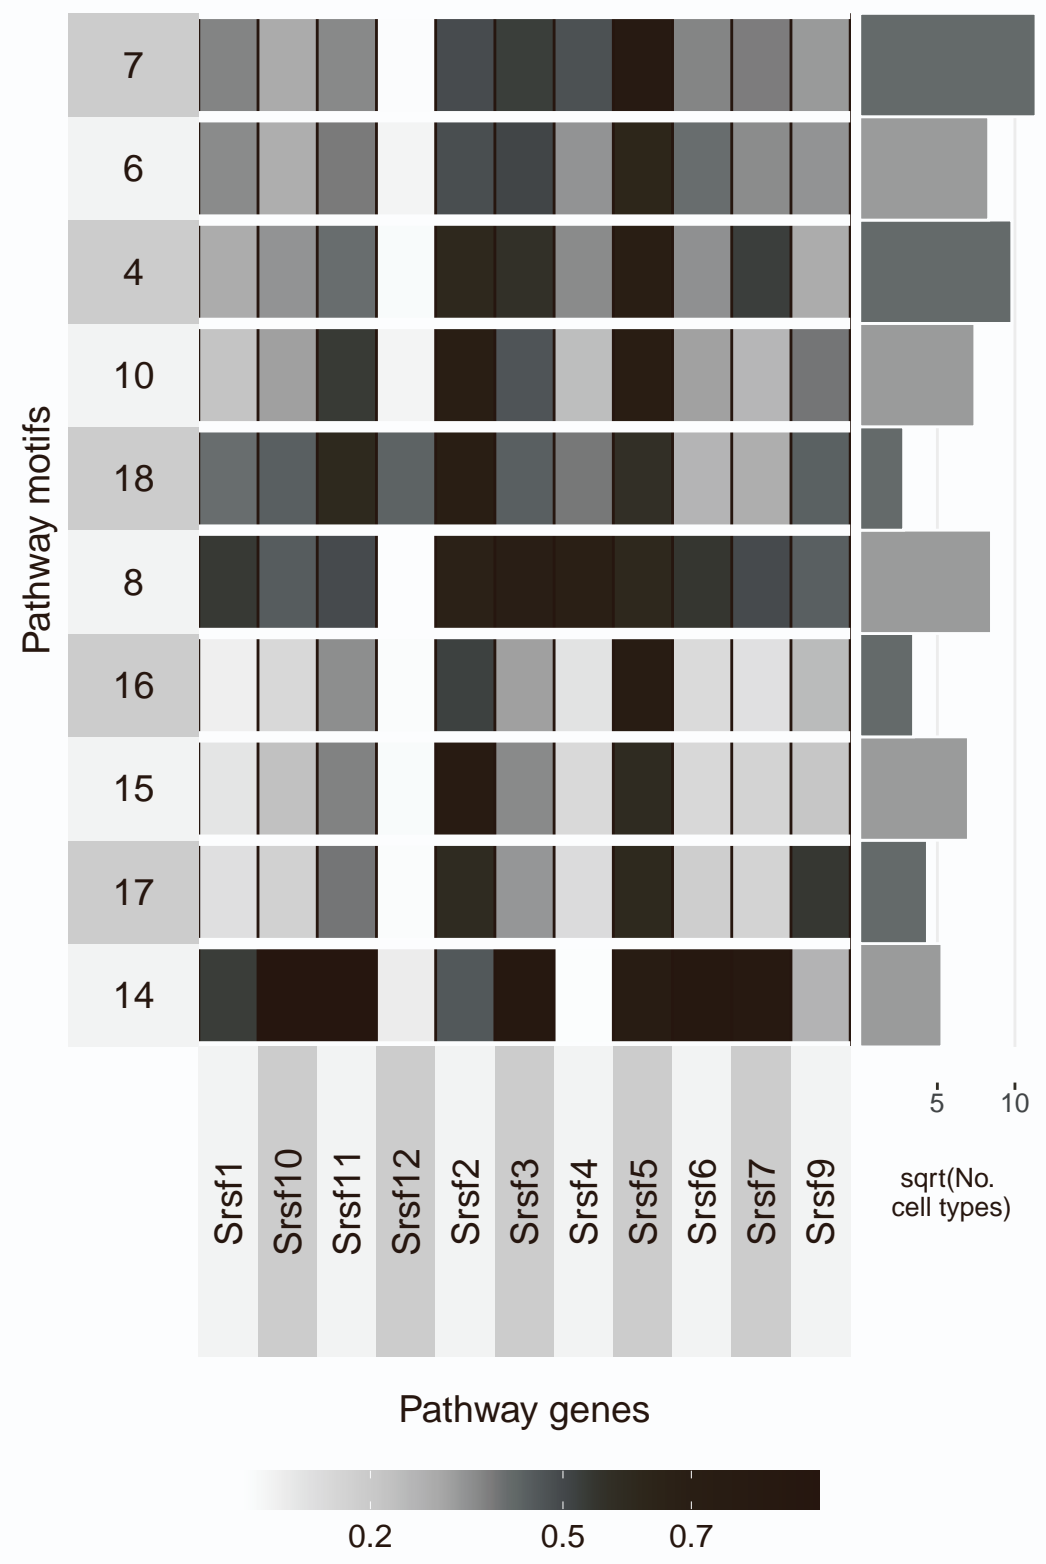

## Motif Tissue Composition

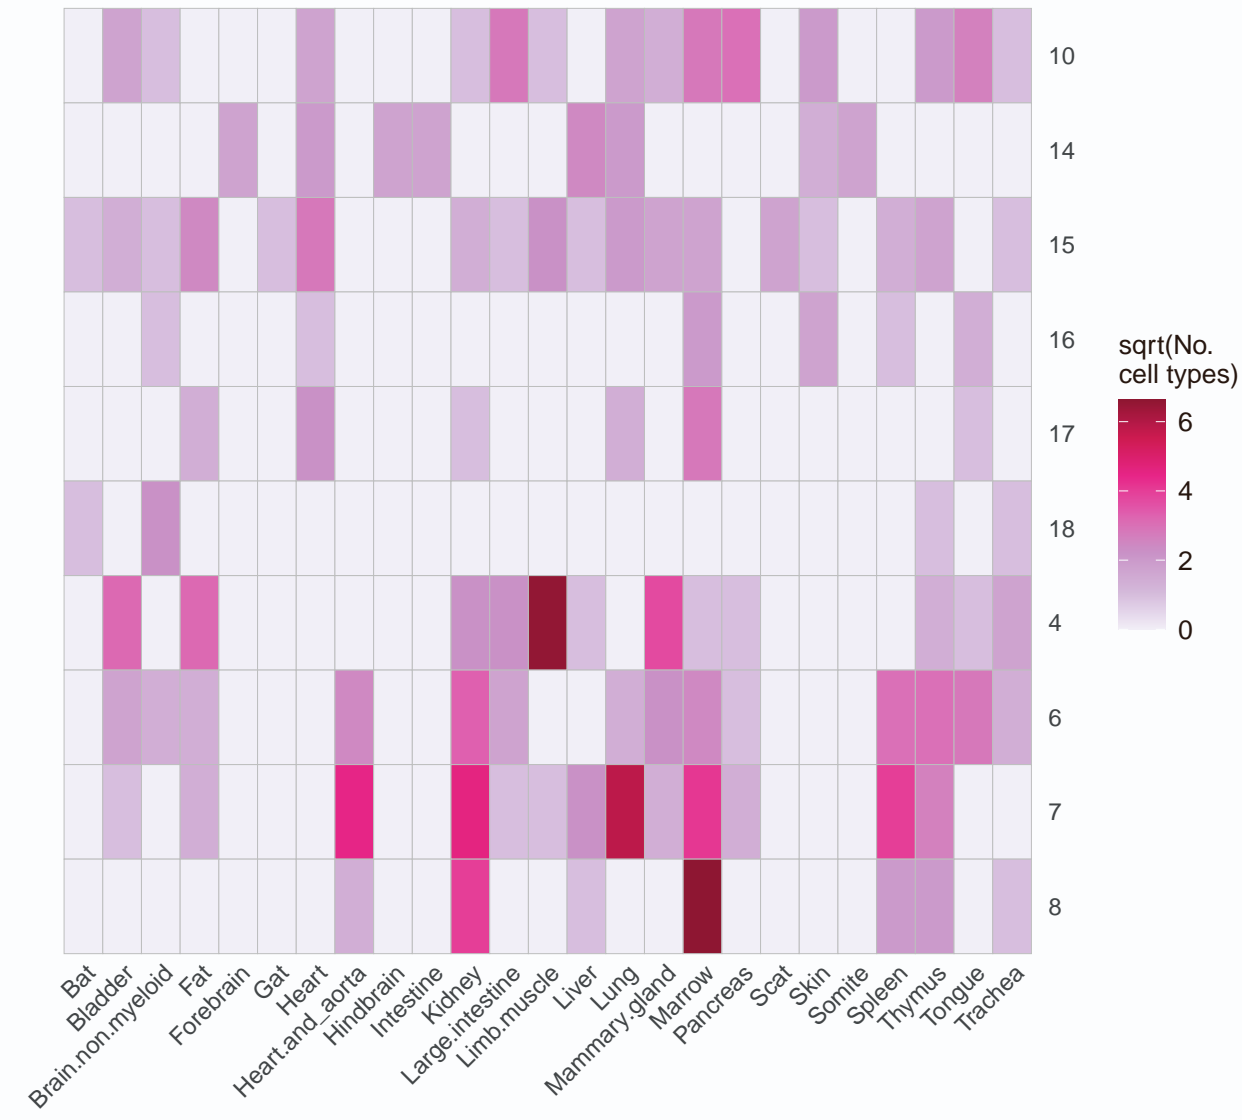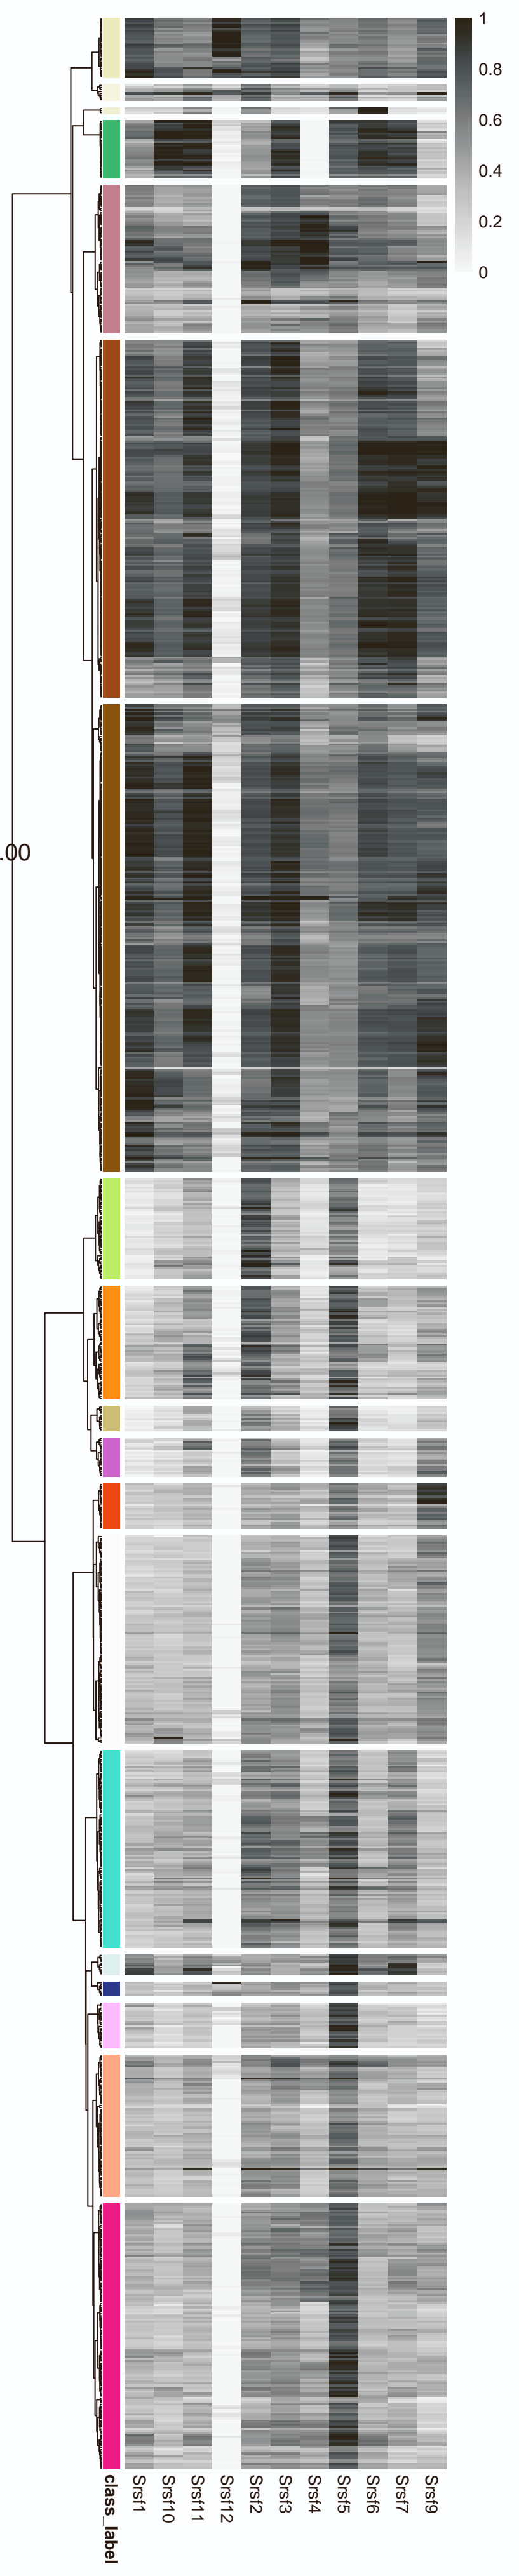

# RNA-splicing by SR protein family (k\_opt = 19)

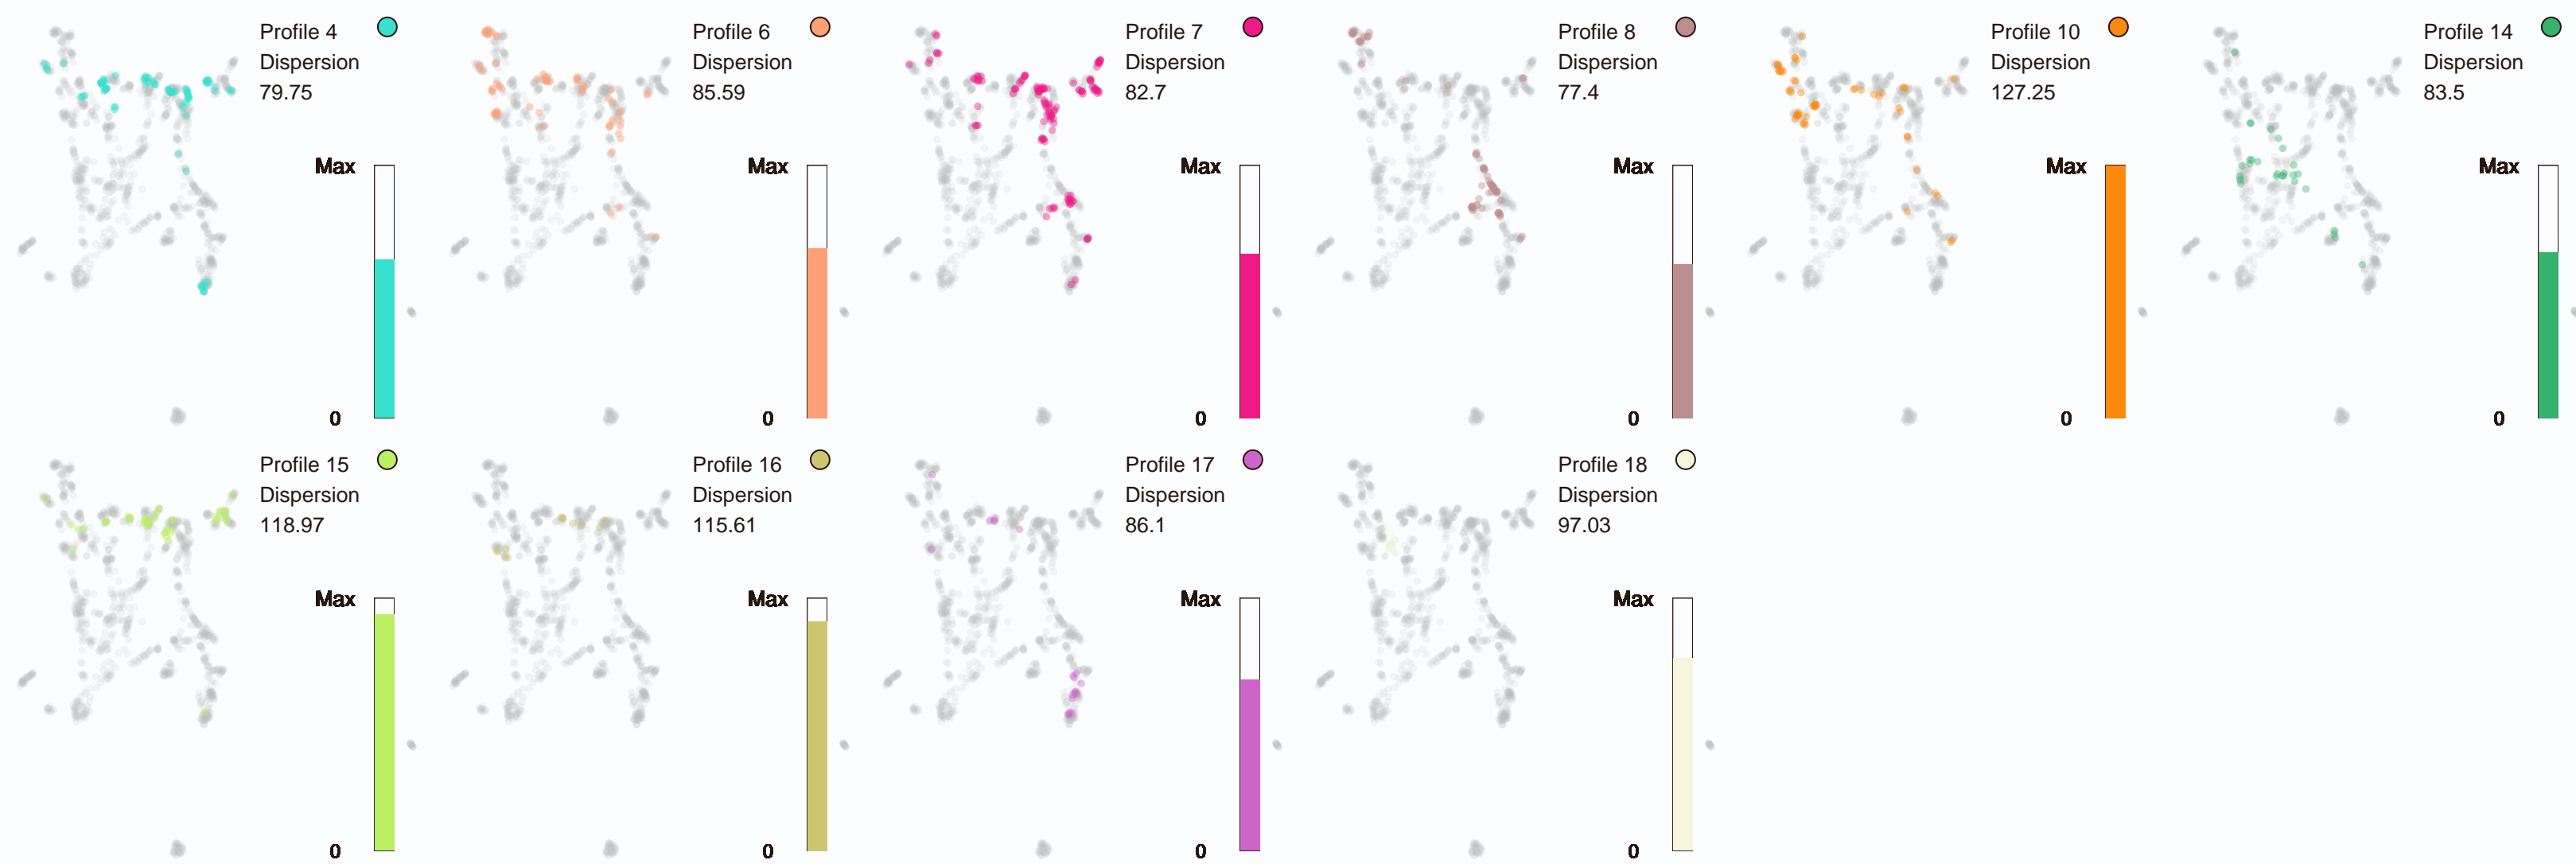

# Tgf-beta family receptors (k\_opt = 25)

Bmpr1a  
 Bmpr1b  
 Acvr1  
 Acvr1c  
 Acvr1b  
 Tgfb1  
 Acvr1c  
 Acvr2a  
 Acvr2b  
 Bmpr2  
 Tgfb2  
 Acvr2a  
 Acvr2b  
 Bmpr2  
 Tgfb2

## Gene Co-Expression Above Threshold

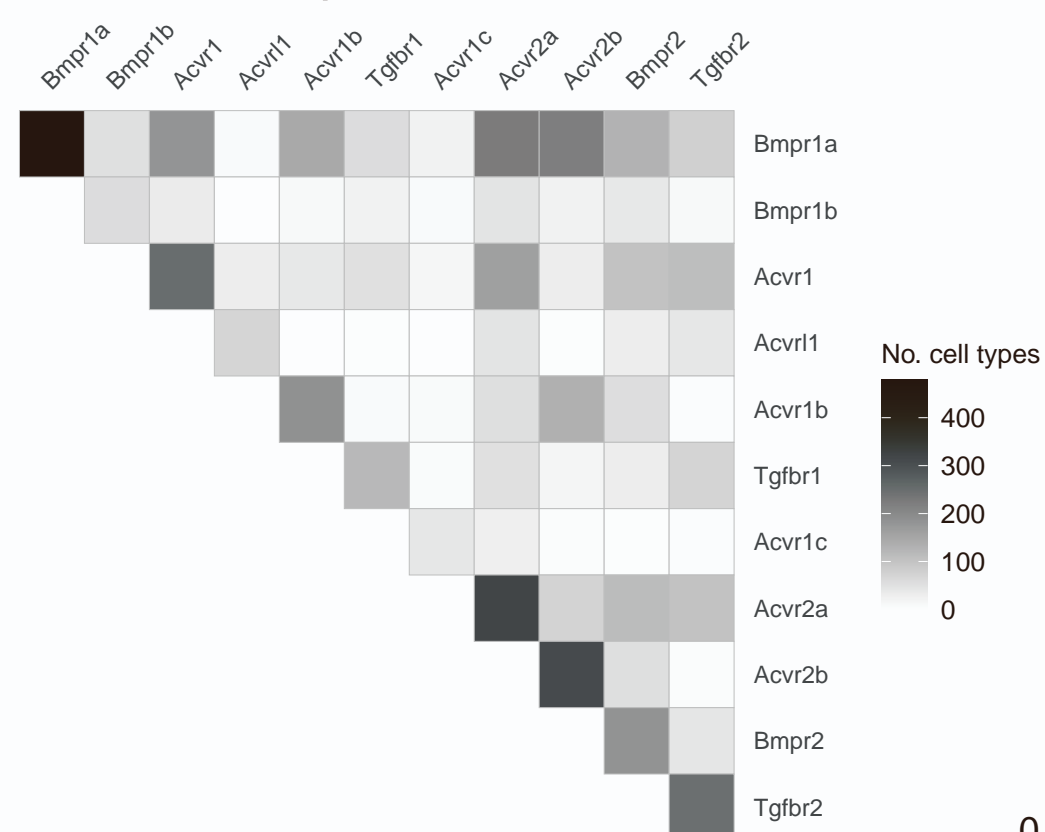

## Silhouette and Z-score

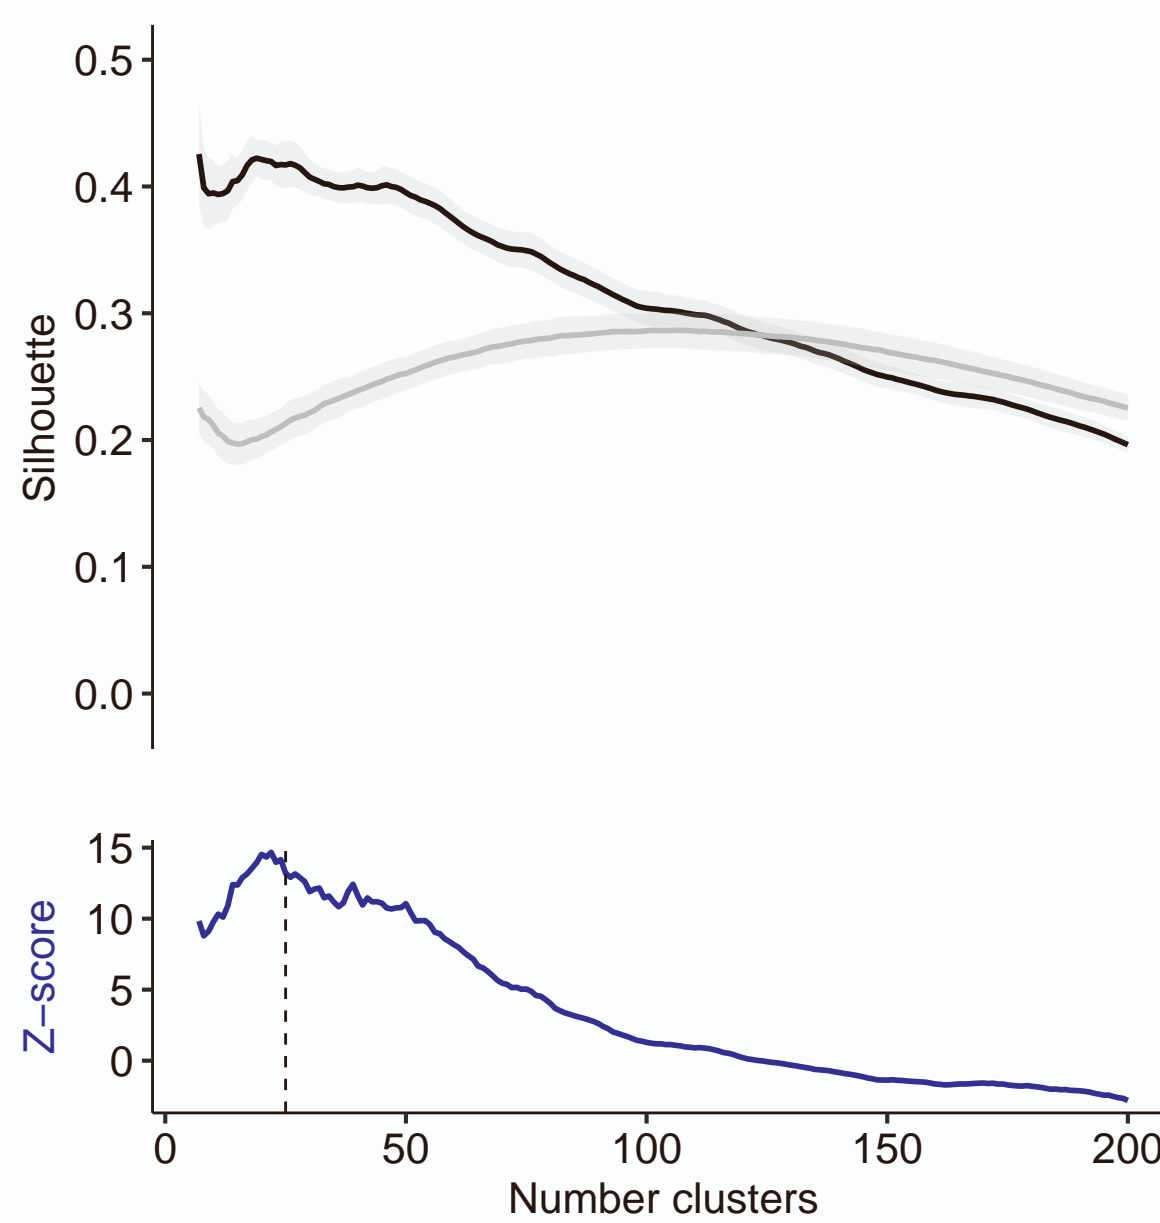

## Global UMAP: Pathway ON

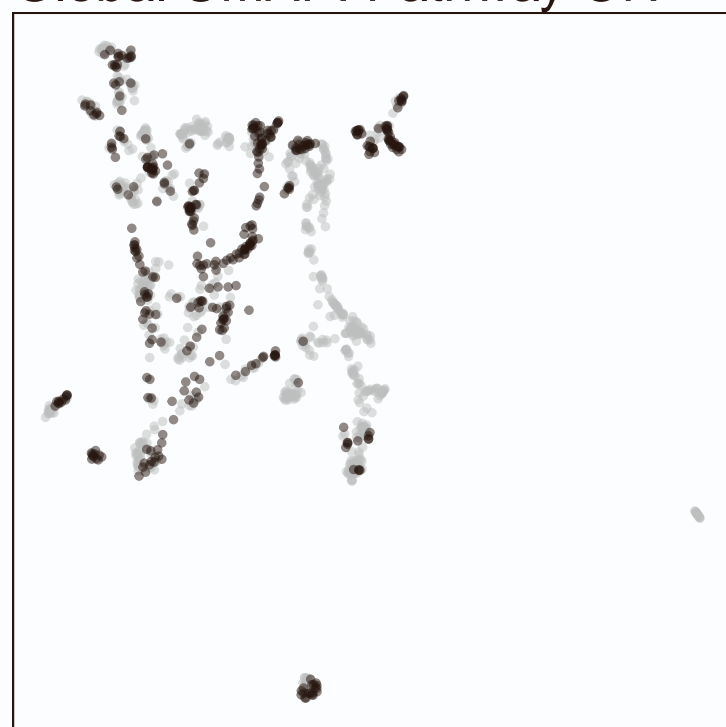

## ECDF of Profile Dispersions

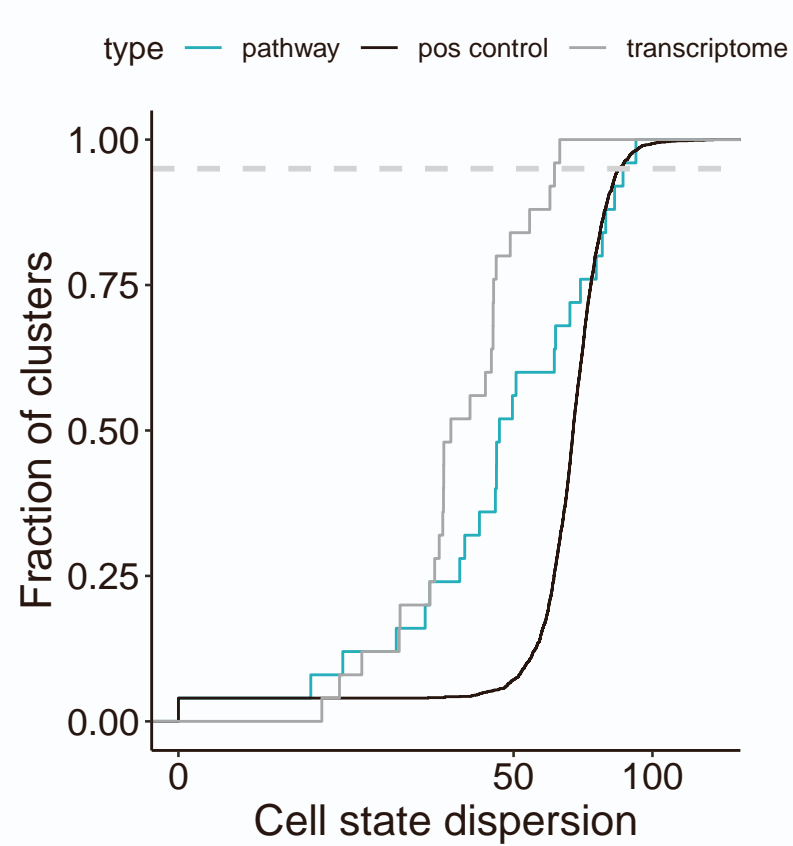

## Profile Dispersion Plot

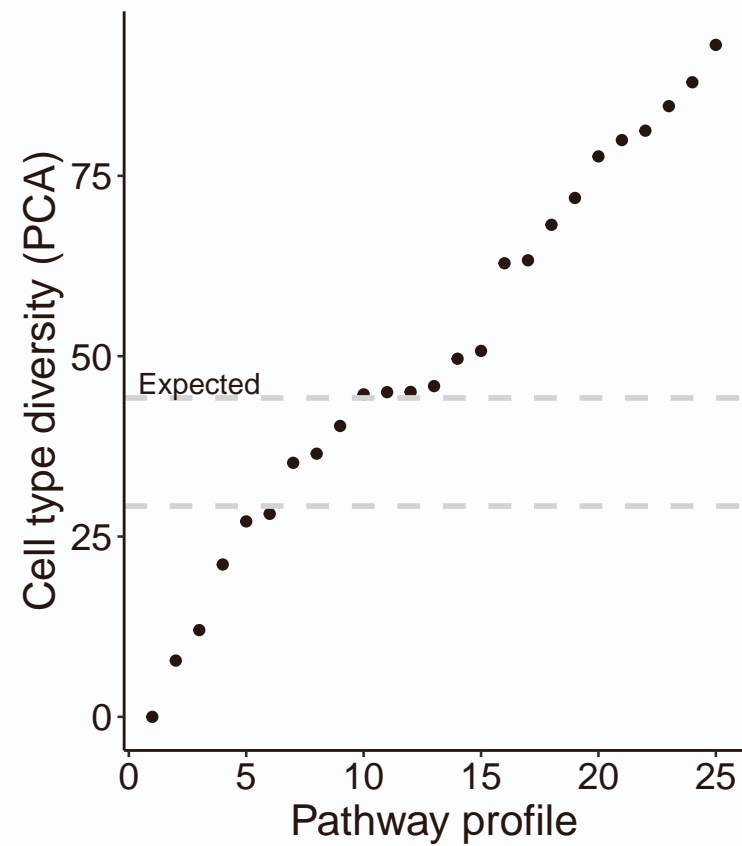

## Motifs, Dispersion $\geq 90^{\text{th}}$ percentile

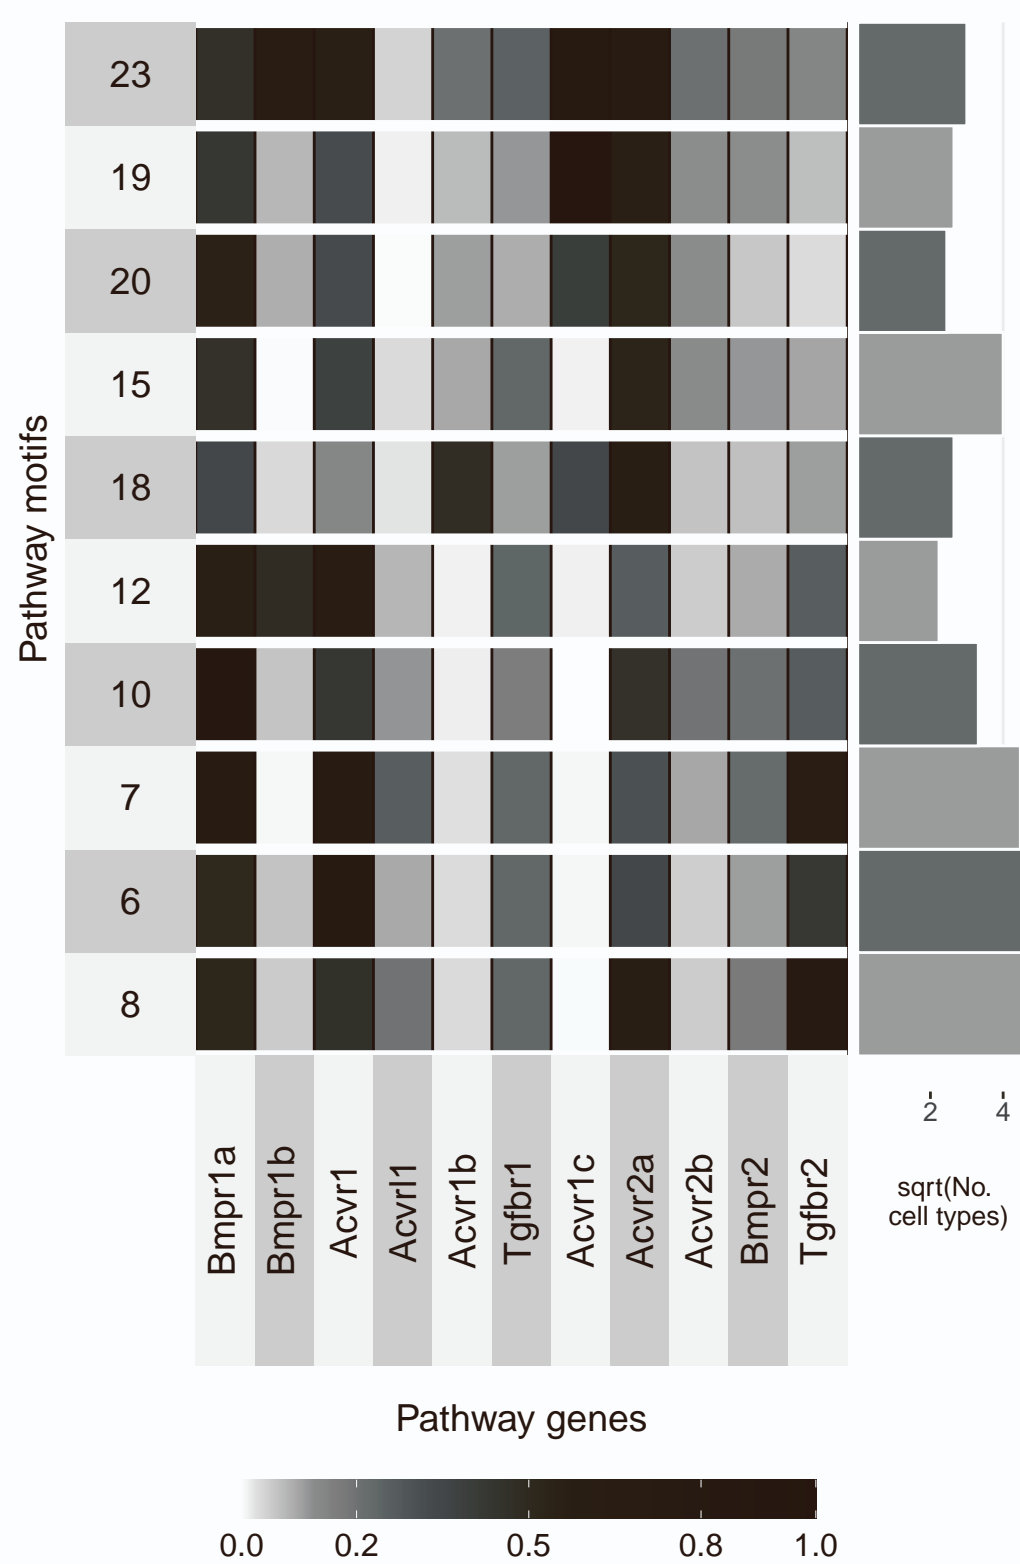

## Motif Tissue Composition

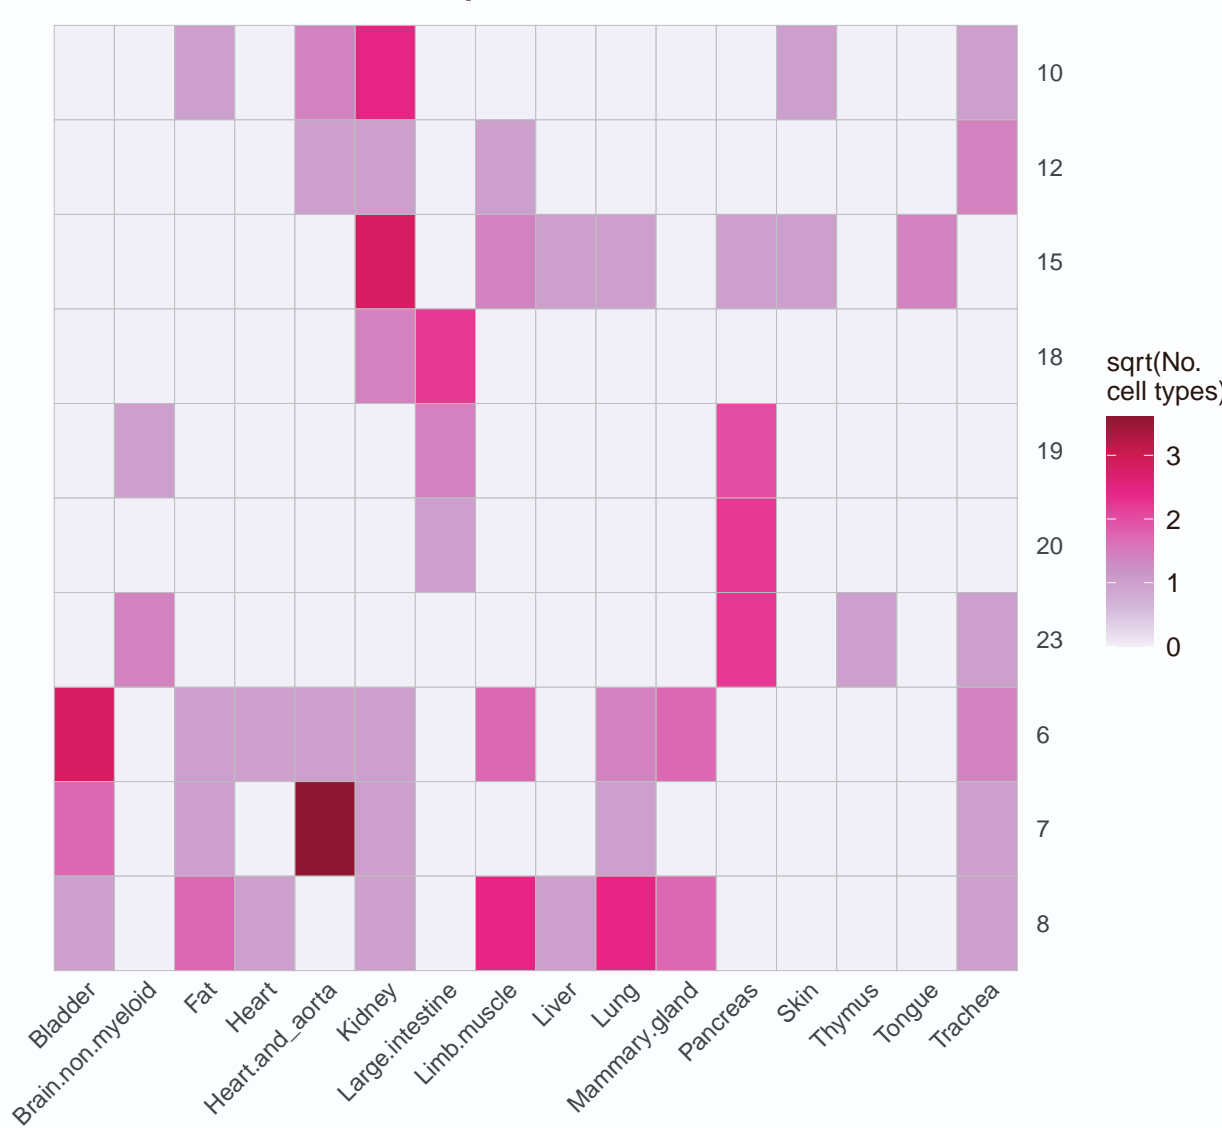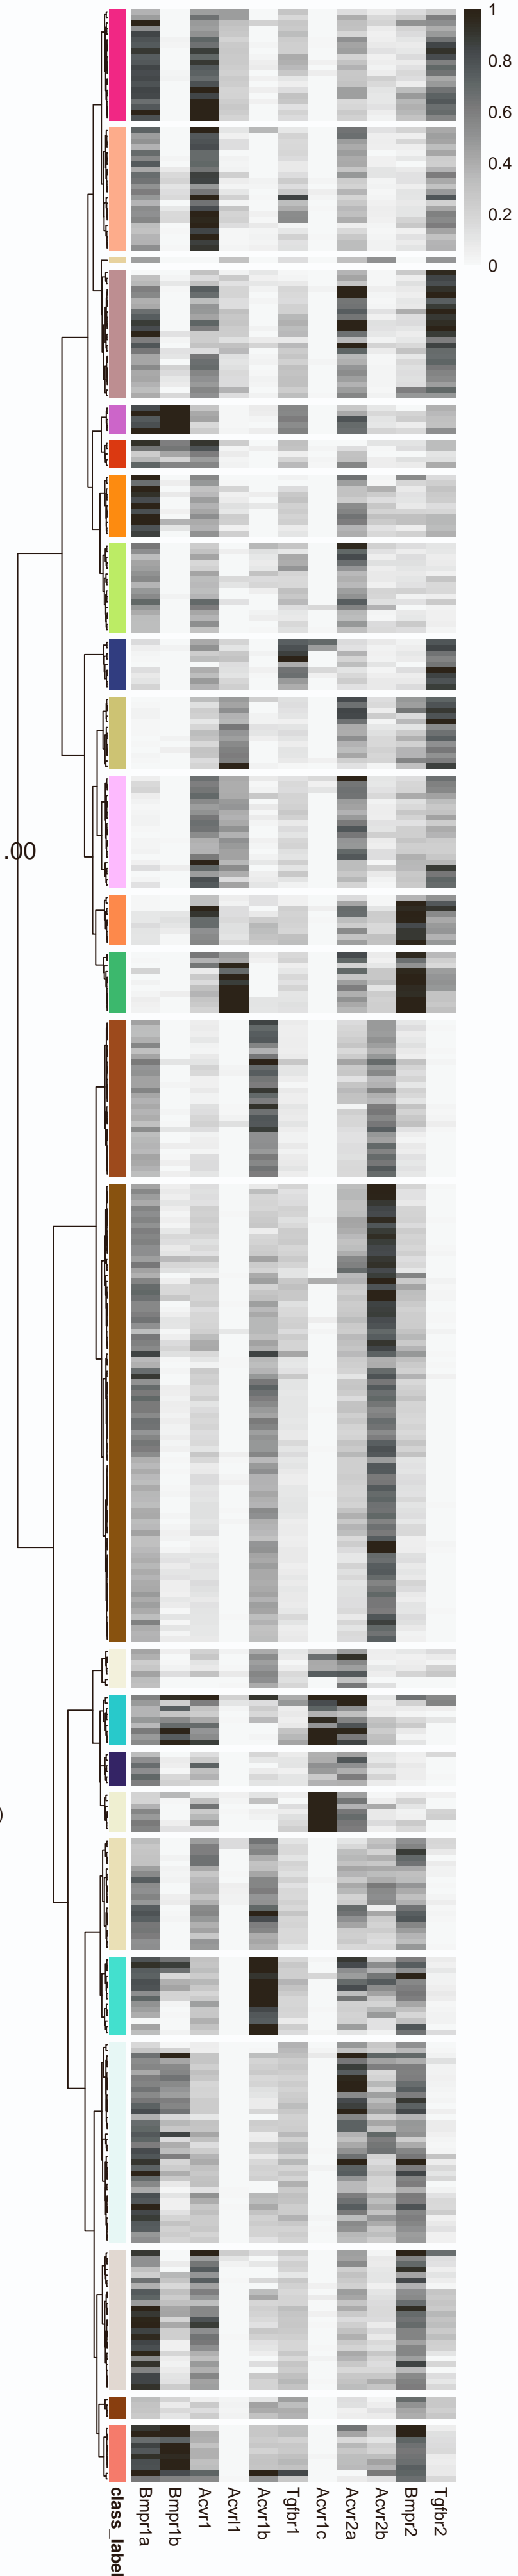



# Tgf-beta family receptors (k\_opt = 25)

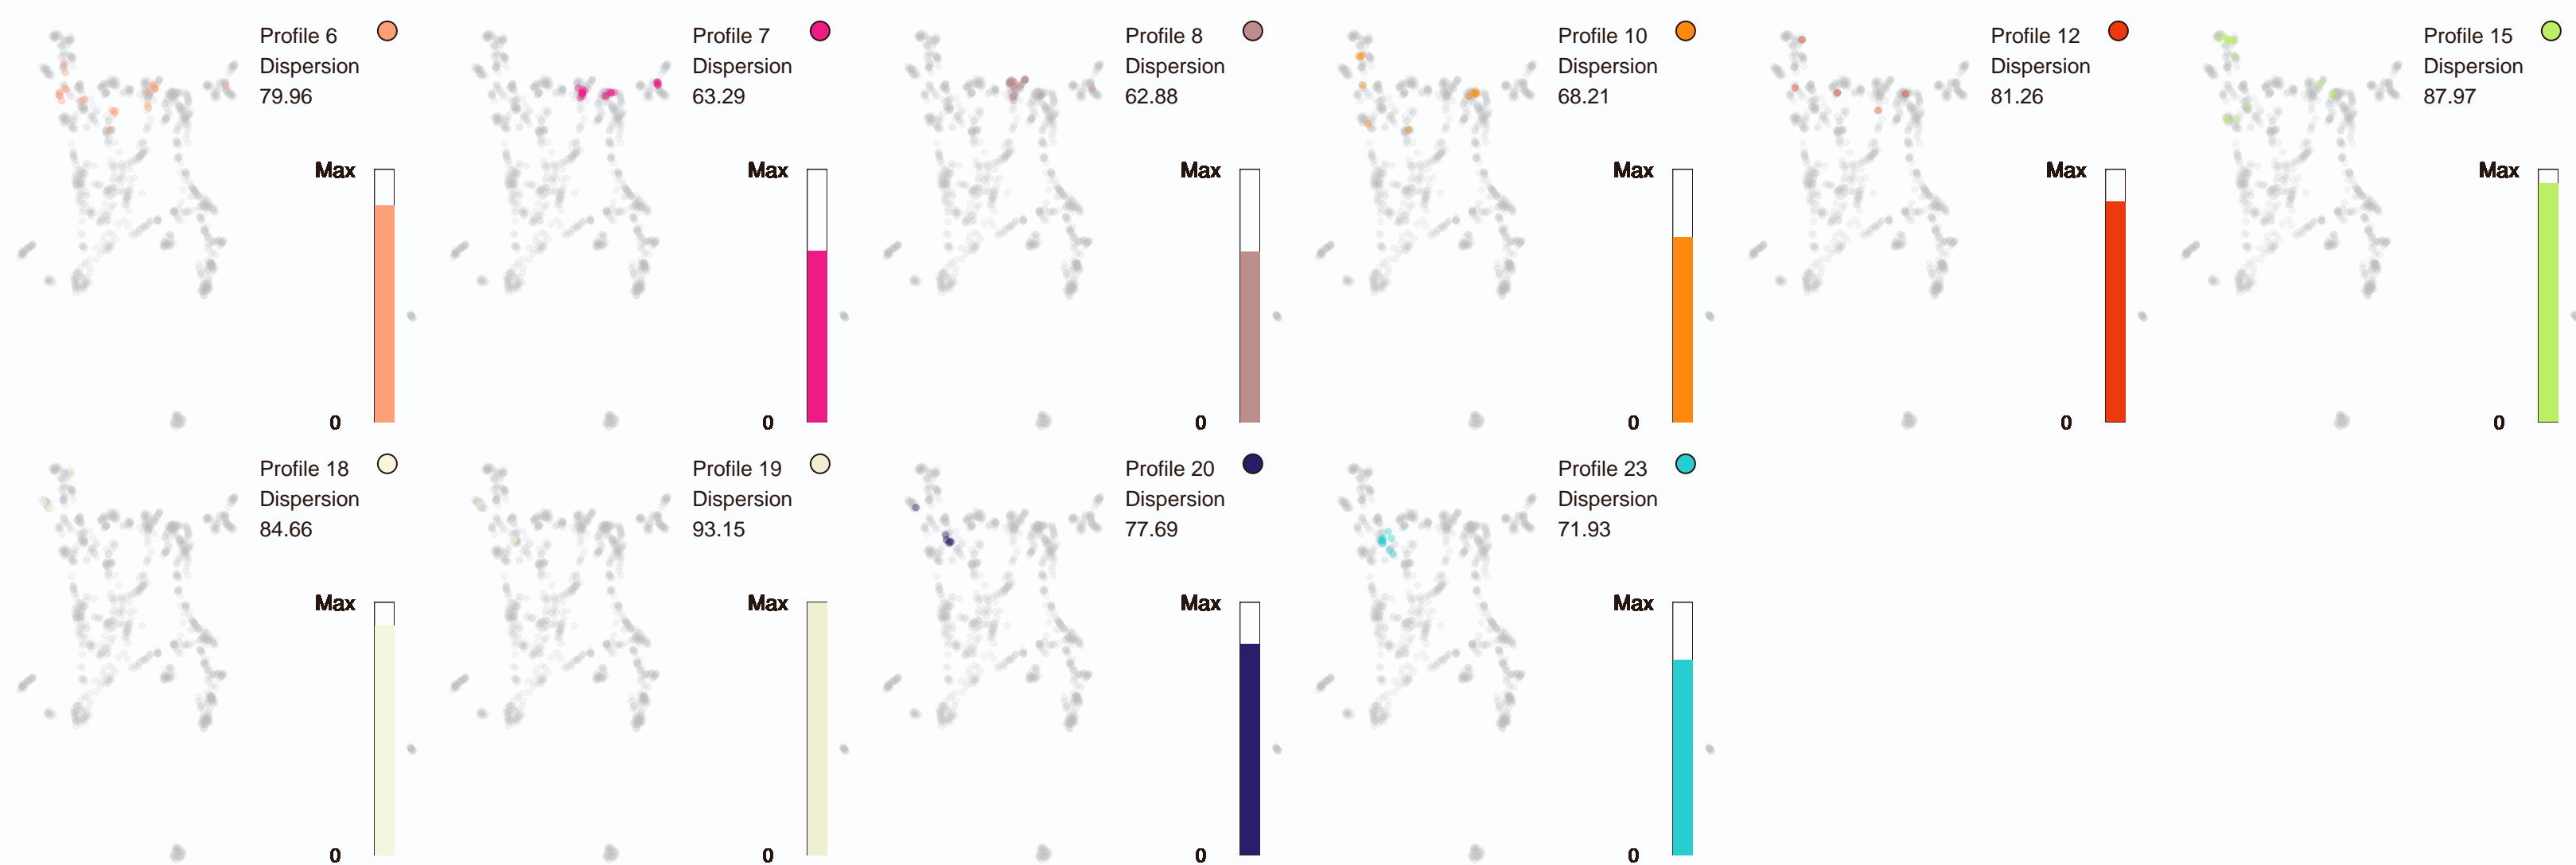

Supplement: mmc1.pdf [file mmc1.pdf]
